# Supplementary material
Source: Research Square preprint supplement (doi:10.21203/rs.3.rs-9233976/v1)
Supplement: Supplementary file 1 [file 0f3792655485474de1546daf.xlsx]

## Sheet: ESM_8
Article title: De novo genome assembly and annotation of the Uzbek autochthonous grapevine cultivar Parkent (Vitis vinifera L.)
Journal: Plant Molecular Biology Reporter
Authors: Ilkhom B. Salakhutdinov, Dmitriy A. Mirzabaev, Venera S. Kamburova, Dilshod E. Usmonov, Farhod S. Radjapov, Shukhrat E. Shermatov, Zabardast T. Buriev, Ibrokhim Y. Abdurakhmonov.
Affiliation: Center of Genomics and Bioinformatics of the Academy of Sciences of the Republic of Uzbekistan
Corresponding author: Dmitriy A. Mirzabaev, email: dmitriy08m@gmail.com.
Online Resource 8. This table provides a comprehensive mapping of Gene Ontology (GO) terms to the predicted protein-coding genes of V. vinifera cv. Parkent.
Category ID	Mapped ID
GO:0000003	PARKENT|GeneID=OUR12_006425-T1|Product=hypothetical protein|Dbxref=InterPro:IPR017930;InterPro:IPR010561;PFAM:PF06584;InterPro:IPR033471;PFAM:PF00249;InterPro:IPR017884;InterPro:IPR001005;InterPro:IPR009057,PARKENT|GeneID=OUR12_021098-T1|Product=hypothetical protein|Dbxref=InterPro:IPR017930;InterPro:IPR010561;PFAM:PF06584;InterPro:IPR033471;PFAM:PF00249;InterPro:IPR017884;InterPro:IPR001005;Inte…
GO:0000009	PARKENT|GeneID=OUR12_007911-T1|Product=hypothetical protein|Dbxref=InterPro:IPR007315
GO:0000012	PARKENT|GeneID=OUR12_012216-T1|Product=hypothetical protein|Dbxref=InterPro:IPR043472;PFAM:PF11969;InterPro:IPR036265;InterPro:IPR019808;PFAM:PF01230;PFAM:PF16278;InterPro:IPR032566,PARKENT|GeneID=OUR12_012217-T1|Product=hypothetical protein|Dbxref=InterPro:IPR027417;PFAM:PF13671;InterPro:IPR043472
GO:0000014	PARKENT|GeneID=OUR12_002582-T1|Product=DNA repair endonuclease uvh1|Dbxref=InterPro:IPR047520;PFAM:PF02732;InterPro:IPR010994;InterPro:IPR011335;InterPro:IPR006166
GO:0000015	PARKENT|GeneID=OUR12_008504-T1|Product=Beta-enolase|Dbxref=PFAM:PF00113;InterPro:IPR036849;PFAM:PF03952;InterPro:IPR000941;InterPro:IPR020810;InterPro:IPR020811;InterPro:IPR029017;InterPro:IPR020809,PARKENT|GeneID=OUR12_009100-T1|Product=hypothetical protein|Dbxref=InterPro:IPR036849;InterPro:IPR036419;PFAM:PF03952;InterPro:IPR000941;InterPro:IPR020810;InterPro:IPR020811;InterPro:IPR029017,PARKEN…
GO:0000026	PARKENT|GeneID=OUR12_017341-T1|Product=Mannosyltransferase aptg1|Dbxref=InterPro:IPR005599,PARKENT|GeneID=OUR12_017342-T1|Product=Mannosyltransferase aptg1|Dbxref=InterPro:IPR005599,PARKENT|GeneID=OUR12_029124-T1|Product=mannosyltransferase|Dbxref=InterPro:IPR005599;PFAM:PF03901
GO:0000027	PARKENT|GeneID=OUR12_003393-T1|Product=hypothetical protein|Dbxref=InterPro:IPR005485,PARKENT|GeneID=OUR12_004240-T1|Product=hypothetical protein|Dbxref=InterPro:IPR035566;InterPro:IPR005813;PFAM:PF00453,PARKENT|GeneID=OUR12_004311-T1|Product=hypothetical protein|Dbxref=InterPro:IPR025607;PFAM:PF14204;InterPro:IPR005485,PARKENT|GeneID=OUR12_007721-T1|Product=60S ribosomal protein L5|Dbxref=InterP…
GO:0000028	PARKENT|GeneID=OUR12_000077-T1|Product=Protein component of the small (40S) ribosomal subunit|Dbxref=InterPro:IPR001266;InterPro:IPR036390;InterPro:IPR018277;PFAM:PF01090;InterPro:IPR036388,PARKENT|GeneID=OUR12_000137-T1|Product=hypothetical protein|Dbxref=InterPro:IPR027417;InterPro:IPR006073;InterPro:IPR005662;InterPro:IPR005225;InterPro:IPR004044;PFAM:PF01926;InterPro:IPR030388;InterPro:IPR009…
GO:0000030	PARKENT|GeneID=OUR12_007911-T1|Product=hypothetical protein|Dbxref=InterPro:IPR007315,PARKENT|GeneID=OUR12_009786-T1|Product=dolichyl-P-Man:Man(5)GlcNAc(2)-PP-dolichol alpha-1,3-mannosyltransferase|Dbxref=InterPro:IPR007873;PFAM:PF05208,PARKENT|GeneID=OUR12_014243-T1|Product=hypothetical protein|Dbxref=PFAM:PF06728;PFAM:PF05007;InterPro:IPR007704,PARKENT|GeneID=OUR12_017341-T1|Product=Mannosyltra…
GO:0000033	PARKENT|GeneID=OUR12_029104-T1|Product=hypothetical protein|Dbxref=InterPro:IPR001296;InterPro:IPR028098;PFAM:PF13692;PFAM:PF13439;InterPro:IPR027054;PFAM:PF00534
GO:0000035	PARKENT|GeneID=OUR12_013118-T1|Product=hypothetical protein|Dbxref=InterPro:IPR036736;InterPro:IPR009081;PFAM:PF00550;InterPro:IPR003231,PARKENT|GeneID=OUR12_015264-T1|Product=hypothetical protein|Dbxref=InterPro:IPR036736;InterPro:IPR009081;PFAM:PF00550;InterPro:IPR003231
GO:0000036	PARKENT|GeneID=OUR12_000469-T1|Product=hypothetical protein|Dbxref=InterPro:IPR045023;InterPro:IPR029069;PFAM:PF20791;InterPro:IPR049427,PARKENT|GeneID=OUR12_000470-T1|Product=hypothetical protein|Dbxref=PFAM:PF01643;InterPro:IPR045023;InterPro:IPR002864;InterPro:IPR029069,PARKENT|GeneID=OUR12_001735-T1|Product=citrate synthase|Dbxref=InterPro:IPR036736;InterPro:IPR020806;InterPro:IPR009081;Inter…
GO:0000045	PARKENT|GeneID=OUR12_002831-T1|Product=autophagy protein 5|Dbxref=InterPro:IPR042527;InterPro:IPR007239;InterPro:IPR048940;InterPro:IPR048939;PFAM:PF20638;PFAM:PF20637;InterPro:IPR042526;PFAM:PF04106;InterPro:IPR048318,PARKENT|GeneID=OUR12_003724-T1|Product=hypothetical protein|Dbxref=InterPro:IPR026854;InterPro:IPR026849,PARKENT|GeneID=OUR12_003725-T1|Product=hypothetical protein|Dbxref=InterPro…
GO:0000049	PARKENT|GeneID=OUR12_000650-T1|Product=hypothetical protein|Dbxref=InterPro:IPR028564;InterPro:IPR038459;InterPro:IPR007356,PARKENT|GeneID=OUR12_003479-T1|Product=Glutamate--tRNA ligase, chloroplastic/mitochondrial|Dbxref=InterPro:IPR033910;InterPro:IPR045462;InterPro:IPR001412;InterPro:IPR000924;InterPro:IPR049940;InterPro:IPR014729;PFAM:PF19269;InterPro:IPR004527;InterPro:IPR020058;InterPro:IPR…
GO:0000050	PARKENT|GeneID=OUR12_025414-T1|Product=hypothetical protein|Dbxref=InterPro:IPR018223;InterPro:IPR048268;InterPro:IPR048267;InterPro:IPR001518;InterPro:IPR014729;PFAM:PF00764;InterPro:IPR023434;InterPro:IPR024074;PFAM:PF20979
GO:0000053	PARKENT|GeneID=OUR12_025414-T1|Product=hypothetical protein|Dbxref=InterPro:IPR018223;InterPro:IPR048268;InterPro:IPR048267;InterPro:IPR001518;InterPro:IPR014729;PFAM:PF00764;InterPro:IPR023434;InterPro:IPR024074;PFAM:PF20979
GO:0000054	PARKENT|GeneID=OUR12_003106-T1|Product=ABC transporter E member 2|Dbxref=InterPro:IPR027417;InterPro:IPR003439;InterPro:IPR017900;PFAM:PF04068;PFAM:PF00037;PFAM:PF12837;InterPro:IPR007209;InterPro:IPR017896;InterPro:IPR034348;InterPro:IPR017871;PFAM:PF00005;InterPro:IPR003593;InterPro:IPR013283,PARKENT|GeneID=OUR12_004835-T1|Product=GTP-binding nuclear protein Ran-2|Dbxref=InterPro:IPR027417;Inte…
GO:0000055	PARKENT|GeneID=OUR12_005237-T1|Product=hypothetical protein|Dbxref=InterPro:IPR007064;PFAM:PF04981;InterPro:IPR048898;InterPro:IPR039768;PFAM:PF21193;InterPro:IPR048899;PFAM:PF21192,PARKENT|GeneID=OUR12_010592-T1|Product=AAA ATPase midasin|Dbxref=InterPro:IPR040848;InterPro:IPR027417;PFAM:PF17867,PARKENT|GeneID=OUR12_013675-T1|Product=hypothetical protein|Dbxref=InterPro:IPR007064;InterPro:IPR039…
GO:0000056	PARKENT|GeneID=OUR12_013760-T1|Product=hypothetical protein|Dbxref=InterPro:IPR001313;InterPro:IPR040000;InterPro:IPR011989;InterPro:IPR016024;PFAM:PF00806;PFAM:PF22493,PARKENT|GeneID=OUR12_019201-T1|Product=Nuclear pore complex protein nup88|Dbxref=InterPro:IPR036322;InterPro:IPR037700;InterPro:IPR019321,PARKENT|GeneID=OUR12_024217-T1|Product=Exportin-1|Dbxref=PFAM:PF18777;PFAM:PF08767;InterPro:…
GO:0000062	PARKENT|GeneID=OUR12_003021-T1|Product=hypothetical protein|Dbxref=InterPro:IPR014352;PFAM:PF00887;InterPro:IPR035984;InterPro:IPR022408;InterPro:IPR000582,PARKENT|GeneID=OUR12_011349-T1|Product=hypothetical protein|Dbxref=PFAM:PF00887;InterPro:IPR014352;InterPro:IPR035984;InterPro:IPR000582,PARKENT|GeneID=OUR12_016615-T1|Product=hypothetical protein|Dbxref=PFAM:PF00887;InterPro:IPR014352;InterPr…
GO:0000064	PARKENT|GeneID=OUR12_002727-T1|Product=hypothetical protein|Dbxref=InterPro:IPR023395;PFAM:PF00153;InterPro:IPR018108;InterPro:IPR050567,PARKENT|GeneID=OUR12_015634-T1|Product=Mitochondrial arginine transporter bac1|Dbxref=InterPro:IPR023395;PFAM:PF00153;InterPro:IPR018108;InterPro:IPR050567
GO:0000070	PARKENT|GeneID=OUR12_011320-T1|Product=hypothetical protein|Dbxref=InterPro:IPR024741;InterPro:IPR011989;PFAM:PF12422;InterPro:IPR016024,PARKENT|GeneID=OUR12_023853-T1|Product=Tubulin gamma-1 chain|Dbxref=InterPro:IPR002454;InterPro:IPR008280;InterPro:IPR017975;InterPro:IPR003008;PFAM:PF00091;InterPro:IPR023123;InterPro:IPR037103;InterPro:IPR000217;InterPro:IPR018316;InterPro:IPR036525,PARKENT|Ge…
GO:0000076	PARKENT|GeneID=OUR12_001401-T1|Product=hypothetical protein|Dbxref=PFAM:PF07962;InterPro:IPR012923;InterPro:IPR001878;PFAM:PF00098;InterPro:IPR036875;InterPro:IPR040038,PARKENT|GeneID=OUR12_010123-T1|Product=hypothetical protein|Dbxref=InterPro:IPR038090;PFAM:PF16679;InterPro:IPR036390;InterPro:IPR032054;InterPro:IPR014939;InterPro:IPR045173,PARKENT|GeneID=OUR12_021047-T1|Product=hypothetical pro…
GO:0000077	PARKENT|GeneID=OUR12_002773-T1|Product=hypothetical protein|Dbxref=InterPro:IPR036322;InterPro:IPR046938;InterPro:IPR019775;InterPro:IPR001680;InterPro:IPR003021;InterPro:IPR037379;InterPro:IPR015943;PFAM:PF02144,PARKENT|GeneID=OUR12_003374-T1|Product=hypothetical protein|Dbxref=PFAM:PF02259;PFAM:PF08064;InterPro:IPR016024;InterPro:IPR012993;InterPro:IPR000403;InterPro:IPR003151;InterPro:IPR03694…
GO:0000079	PARKENT|GeneID=OUR12_000659-T1|Product=hypothetical protein|Dbxref=InterPro:IPR039361;InterPro:IPR036915;PFAM:PF02984;InterPro:IPR006671;InterPro:IPR013763;InterPro:IPR004367,PARKENT|GeneID=OUR12_000988-T1|Product=Cyclin-D1-1|Dbxref=InterPro:IPR039361;InterPro:IPR036915;PFAM:PF02984;InterPro:IPR006671;InterPro:IPR013763;InterPro:IPR048258;InterPro:IPR004367;PFAM:PF00134,PARKENT|GeneID=OUR12_00335…
GO:0000082	PARKENT|GeneID=OUR12_009030-T1|Product=Cyclin-dependent kinase 3|Dbxref=InterPro:IPR011009;InterPro:IPR000719;InterPro:IPR050108,PARKENT|GeneID=OUR12_011858-T1|Product=Cell division control protein 2 C|Dbxref=PFAM:PF06293;InterPro:IPR000719;InterPro:IPR008271;InterPro:IPR050108;PFAM:PF00069;InterPro:IPR017441;PFAM:PF07714;InterPro:IPR011009,PARKENT|GeneID=OUR12_023134-T1|Product=Cell division con…
GO:0000095	PARKENT|GeneID=OUR12_011608-T1|Product=S-adenosylmethionine carrier 1, chloroplastic/mitochondrial|Dbxref=InterPro:IPR023395;PFAM:PF00153;InterPro:IPR002067;InterPro:IPR018108,PARKENT|GeneID=OUR12_017813-T1|Product=hypothetical protein|Dbxref=InterPro:IPR023395;PFAM:PF00153;InterPro:IPR018108,PARKENT|GeneID=OUR12_019744-T1|Product=hypothetical protein|Dbxref=InterPro:IPR018247;InterPro:IPR002048;…
GO:0000103	PARKENT|GeneID=OUR12_003893-T1|Product=Adenylyl-sulfate kinase 1, chloroplastic|Dbxref=PFAM:PF01583;InterPro:IPR002891;InterPro:IPR027417,PARKENT|GeneID=OUR12_006017-T1|Product=Ca(2+)-binding ATP:ADP antiporter sal1|Dbxref=PFAM:PF00459;InterPro:IPR006239;InterPro:IPR020583;InterPro:IPR051090;InterPro:IPR000760,PARKENT|GeneID=OUR12_006727-T1|Product=Sigma1B-adaptin|Dbxref=InterPro:IPR025980;PFAM:P…
GO:0000104	PARKENT|GeneID=OUR12_005504-T1|Product=Succinate dehydrogenase [ubiquinone] flavoprotein subunit 1, mitochondrial|Dbxref=InterPro:IPR011281;InterPro:IPR003953;InterPro:IPR014006;InterPro:IPR015939;InterPro:IPR030664;InterPro:IPR003952;InterPro:IPR037099;InterPro:IPR027477;InterPro:IPR036188;PFAM:PF02910;PFAM:PF00890,PARKENT|GeneID=OUR12_020694-T1|Product=Sdh1-2p|Dbxref=PFAM:PF02910;InterPro:IPR03…
GO:0000105	PARKENT|GeneID=OUR12_006636-T1|Product=imidazoleglycerol-phosphate dehydratase|Dbxref=InterPro:IPR000807;PFAM:PF00475;InterPro:IPR020565;InterPro:IPR020568;InterPro:IPR038494,PARKENT|GeneID=OUR12_013097-T1|Product=hypothetical protein|Dbxref=InterPro:IPR011256;InterPro:IPR013785;PFAM:PF04832;InterPro:IPR011858;InterPro:IPR006062;PFAM:PF00977;InterPro:IPR044524;InterPro:IPR011060;InterPro:IPR00691…
GO:0000109	PARKENT|GeneID=OUR12_027403-T1|Product=WD repeat-containing protein ATCSA-1|Dbxref=InterPro:IPR042238;InterPro:IPR036322;InterPro:IPR020472;InterPro:IPR019775;PFAM:PF00400;InterPro:IPR001680;InterPro:IPR015943
GO:0000110	PARKENT|GeneID=OUR12_002582-T1|Product=DNA repair endonuclease uvh1|Dbxref=InterPro:IPR047520;PFAM:PF02732;InterPro:IPR010994;InterPro:IPR011335;InterPro:IPR006166,PARKENT|GeneID=OUR12_021155-T1|Product=hypothetical protein|Dbxref=InterPro:IPR004579
GO:0000111	PARKENT|GeneID=OUR12_015364-T1|Product=hypothetical protein|Dbxref=InterPro:IPR036985;InterPro:IPR004583;InterPro:IPR038765,PARKENT|GeneID=OUR12_021649-T1|Product=hypothetical protein|Dbxref=InterPro:IPR042488;InterPro:IPR004583;PFAM:PF10405;InterPro:IPR018328,PARKENT|GeneID=OUR12_021650-T1|Product=hypothetical protein|Dbxref=InterPro:IPR004583;PFAM:PF10403;InterPro:IPR018327;PFAM:PF10404;InterPr…
GO:0000112	PARKENT|GeneID=OUR12_001818-T1|Product=General transcription and DNA repair factor IIH helicase subunit xpb1|Dbxref=PFAM:PF13625;InterPro:IPR027417;InterPro:IPR014001;InterPro:IPR001650;PFAM:PF16203;InterPro:IPR032830;InterPro:IPR050615;InterPro:IPR001161;PFAM:PF04851;InterPro:IPR032438;PFAM:PF00271;InterPro:IPR006935
GO:0000118	PARKENT|GeneID=OUR12_001021-T1|Product=hypothetical protein|Dbxref=InterPro:IPR013194;PFAM:PF02671;InterPro:IPR036600;PFAM:PF08295;InterPro:IPR003822;PFAM:PF16879;InterPro:IPR031693;InterPro:IPR039774,PARKENT|GeneID=OUR12_001815-T1|Product=hypothetical protein|Dbxref=InterPro:IPR024145;InterPro:IPR038291;InterPro:IPR025718;PFAM:PF13867,PARKENT|GeneID=OUR12_002400-T1|Product=hypothetical protein|D…
GO:0000120	PARKENT|GeneID=OUR12_029181-T1|Product=hypothetical protein|Dbxref=PFAM:PF14929;InterPro:IPR039495
GO:0000122	PARKENT|GeneID=OUR12_001021-T1|Product=hypothetical protein|Dbxref=InterPro:IPR013194;PFAM:PF02671;InterPro:IPR036600;PFAM:PF08295;InterPro:IPR003822;PFAM:PF16879;InterPro:IPR031693;InterPro:IPR039774,PARKENT|GeneID=OUR12_002281-T1|Product=hypothetical protein|Dbxref=InterPro:IPR029005;PFAM:PF01803,PARKENT|GeneID=OUR12_005997-T1|Product=hypothetical protein|Dbxref=InterPro:IPR029005;PFAM:PF01803,…
GO:0000123	PARKENT|GeneID=OUR12_006911-T1|Product=hypothetical protein|Dbxref=InterPro:IPR015418;PFAM:PF09340,PARKENT|GeneID=OUR12_007530-T1|Product=hypothetical protein|Dbxref=InterPro:IPR026316;InterPro:IPR025927;PFAM:PF13891,PARKENT|GeneID=OUR12_009471-T1|Product=hypothetical protein|Dbxref=InterPro:IPR001487;InterPro:IPR016181;InterPro:IPR000182;InterPro:IPR037800;PFAM:PF00439;InterPro:IPR047365;InterPr…
GO:0000124	PARKENT|GeneID=OUR12_000463-T1|Product=hypothetical protein|Dbxref=PFAM:PF20474;InterPro:IPR046467;InterPro:IPR021950;PFAM:PF12090;InterPro:IPR046468,PARKENT|GeneID=OUR12_003865-T1|Product=hypothetical protein|Dbxref=InterPro:IPR024738;PFAM:PF12767,PARKENT|GeneID=OUR12_004557-T1|Product=hypothetical protein|Dbxref=InterPro:IPR024738;PFAM:PF12767,PARKENT|GeneID=OUR12_006464-T1|Product=hypothetical…
GO:0000126	PARKENT|GeneID=OUR12_003514-T1|Product=hypothetical protein|Dbxref=PFAM:PF15963;InterPro:IPR039467;PFAM:PF00249;InterPro:IPR001005;InterPro:IPR009057,PARKENT|GeneID=OUR12_011956-T1|Product=hypothetical protein|Dbxref=PFAM:PF07741;InterPro:IPR036915;PFAM:PF00382;InterPro:IPR013150;InterPro:IPR011665;InterPro:IPR000812
GO:0000127	PARKENT|GeneID=OUR12_007776-T1|Product=hypothetical protein|Dbxref=InterPro:IPR040454;PFAM:PF09734;InterPro:IPR019136,PARKENT|GeneID=OUR12_013874-T1|Product=hypothetical protein|Dbxref=PFAM:PF24657;PFAM:PF23704;PFAM:PF24101;InterPro:IPR007309;InterPro:IPR035625;PFAM:PF24655;InterPro:IPR044210;PFAM:PF24538;PFAM:PF04182;PFAM:PF24658,PARKENT|GeneID=OUR12_020656-T1|Product=hypothetical protein|Dbxref…
GO:0000139	PARKENT|GeneID=OUR12_000231-T1|Product=hypothetical protein|Dbxref=InterPro:IPR014848,PARKENT|GeneID=OUR12_000232-T1|Product=hypothetical protein|Dbxref=InterPro:IPR014848,PARKENT|GeneID=OUR12_000233-T1|Product=hypothetical protein|Dbxref=InterPro:IPR014848,PARKENT|GeneID=OUR12_001042-T1|Product=Hydroxyproline O-galactosyltransferase galt6|Dbxref=InterPro:IPR002659;PFAM:PF01762;PFAM:PF00337;Inter…
GO:0000145	PARKENT|GeneID=OUR12_000182-T1|Product=Exocyst complex component exo84c|Dbxref=PFAM:PF16528;InterPro:IPR042560;InterPro:IPR033961;InterPro:IPR032403;InterPro:IPR016159;InterPro:IPR042561,PARKENT|GeneID=OUR12_001041-T1|Product=Exocyst complex component exo84a|Dbxref=PFAM:PF16528;InterPro:IPR042560;InterPro:IPR033961;PFAM:PF08700;InterPro:IPR032403;InterPro:IPR016159;InterPro:IPR042561,PARKENT|Gene…
GO:0000146	PARKENT|GeneID=OUR12_004512-T1|Product=hypothetical protein|Dbxref=InterPro:IPR036018;InterPro:IPR027417;InterPro:IPR037975;PFAM:PF00063;PFAM:PF00612;InterPro:IPR036961;InterPro:IPR002710;PFAM:PF01843;InterPro:IPR004009;InterPro:IPR000048;InterPro:IPR001609,PARKENT|GeneID=OUR12_007065-T1|Product=hypothetical protein|Dbxref=InterPro:IPR027417;PFAM:PF00612;InterPro:IPR036961;InterPro:IPR002710;Inte…
GO:0000148	PARKENT|GeneID=OUR12_005998-T1|Product=Callose synthase 5|Dbxref=PFAM:PF25968;InterPro:IPR026899;InterPro:IPR023175;InterPro:IPR003440;InterPro:IPR039431;PFAM:PF14288;PFAM:PF04652,PARKENT|GeneID=OUR12_007935-T1|Product=Callose synthase 9|Dbxref=InterPro:IPR003440,PARKENT|GeneID=OUR12_007936-T1|Product=Callose synthase 9|Dbxref=InterPro:IPR003440,PARKENT|GeneID=OUR12_007937-T1|Product=Callose synt…
GO:0000149	PARKENT|GeneID=OUR12_000582-T1|Product=hypothetical protein|Dbxref=InterPro:IPR011417;InterPro:IPR014712;InterPro:IPR045192;PFAM:PF07651;InterPro:IPR048050;InterPro:IPR008942;InterPro:IPR013809,PARKENT|GeneID=OUR12_000663-T1|Product=hypothetical protein|Dbxref=InterPro:IPR011417;InterPro:IPR014712;InterPro:IPR045192;PFAM:PF07651;InterPro:IPR008942;InterPro:IPR013809,PARKENT|GeneID=OUR12_000694-T1…
GO:0000150	PARKENT|GeneID=OUR12_006722-T1|Product=Meiotic recombination protein dmc1|Dbxref=InterPro:IPR020587;InterPro:IPR027417;InterPro:IPR010995;InterPro:IPR020588;InterPro:IPR013632,PARKENT|GeneID=OUR12_016503-T1|Product=recombinase rad51|Dbxref=PFAM:PF14520;InterPro:IPR011941;InterPro:IPR020587;InterPro:IPR027417;PFAM:PF00154;InterPro:IPR010995;InterPro:IPR016467;PFAM:PF08423;InterPro:IPR020588;PFAM:P…
GO:0000151	PARKENT|GeneID=OUR12_001195-T1|Product=hypothetical protein|Dbxref=InterPro:IPR039164;PFAM:PF02207;InterPro:IPR003126,PARKENT|GeneID=OUR12_003623-T1|Product=carbonyl reductase (NADPH-dependent) ari1|Dbxref=InterPro:IPR044066;PFAM:PF01485;InterPro:IPR002867;InterPro:IPR054694;PFAM:PF26200;PFAM:PF21235;InterPro:IPR048962;InterPro:IPR031127;InterPro:IPR045840;PFAM:PF22605;PFAM:PF19422,PARKENT|GeneID…
GO:0000154	PARKENT|GeneID=OUR12_005630-T1|Product=Ribosomal RNA small subunit methyltransferase, mitochondrial|Dbxref=PFAM:PF08242;InterPro:IPR011530;PFAM:PF13649;InterPro:IPR001737;PFAM:PF08241;InterPro:IPR020598;InterPro:IPR029063;PFAM:PF00398,PARKENT|GeneID=OUR12_009928-T1|Product=hypothetical protein|Dbxref=InterPro:IPR011530;PFAM:PF13649;InterPro:IPR020596;InterPro:IPR001737;PFAM:PF08241;InterPro:IPR02…
GO:0000155	PARKENT|GeneID=OUR12_000673-T1|Product=carbon catabolite repressor protein|Dbxref=InterPro:IPR006189;InterPro:IPR005467;InterPro:IPR011006;InterPro:IPR003594;InterPro:IPR004358;PFAM:PF02518;InterPro:IPR001789;InterPro:IPR050956;InterPro:IPR042240;PFAM:PF00072;PFAM:PF24896;InterPro:IPR036097;InterPro:IPR003661;PFAM:PF03924;PFAM:PF00512;InterPro:IPR036890,PARKENT|GeneID=OUR12_000799-T1|Product=hypo…
GO:0000159	PARKENT|GeneID=OUR12_000348-T1|Product=hypothetical protein|Dbxref=InterPro:IPR021133;InterPro:IPR000357;InterPro:IPR011989;PFAM:PF02985;InterPro:IPR054573;PFAM:PF22646;InterPro:IPR051023;PFAM:PF25757;InterPro:IPR016024,PARKENT|GeneID=OUR12_001493-T1|Product=hypothetical protein|Dbxref=InterPro:IPR011989;InterPro:IPR002554;InterPro:IPR016024,PARKENT|GeneID=OUR12_001494-T1|Product=hypothetical pro…
GO:0000160	PARKENT|GeneID=OUR12_000447-T1|Product=hypothetical protein|Dbxref=InterPro:IPR011006;InterPro:IPR045279;InterPro:IPR001789;InterPro:IPR006447;InterPro:IPR009057,PARKENT|GeneID=OUR12_000448-T1|Product=hypothetical protein|Dbxref=InterPro:IPR011006;InterPro:IPR045279;InterPro:IPR001789;PFAM:PF00072;InterPro:IPR006447;InterPro:IPR009057,PARKENT|GeneID=OUR12_000452-T1|Product=hypothetical protein|Db…
GO:0000162	PARKENT|GeneID=OUR12_000683-T1|Product=Ankyrin repeat and SOCS box protein 2|Dbxref=InterPro:IPR050472;InterPro:IPR017926;InterPro:IPR029062;PFAM:PF00117;InterPro:IPR006221,PARKENT|GeneID=OUR12_008552-T1|Product=Allatostatins [Cleaved into: Allatostatin-1|Dbxref=PFAM:PF04715;InterPro:IPR006805;InterPro:IPR005801;InterPro:IPR019999,PARKENT|GeneID=OUR12_008553-T1|Product=Allatostatins [Cleaved into…
GO:0000165	PARKENT|GeneID=OUR12_001549-T1|Product=Dual specificity mitogen-activated protein kinase kinase 4|Dbxref=InterPro:IPR008271;PFAM:PF00069;InterPro:IPR017441;InterPro:IPR000719;PFAM:PF07714;InterPro:IPR011009,PARKENT|GeneID=OUR12_016650-T1|Product=hypothetical protein|Dbxref=InterPro:IPR008271;InterPro:IPR001245;PFAM:PF00069;InterPro:IPR017441;InterPro:IPR000719;PFAM:PF07714;InterPro:IPR011009,PARK…
GO:0000166	PARKENT|GeneID=OUR12_000152-T1|Product=serine/threonine protein kinase Ran1|Dbxref=PFAM:PF00702;InterPro:IPR008250;InterPro:IPR027256;InterPro:IPR023299;InterPro:IPR001757;InterPro:IPR023214;InterPro:IPR017969;InterPro:IPR036412;InterPro:IPR006121;PFAM:PF00122;InterPro:IPR036163;InterPro:IPR018303;PFAM:PF00403;InterPro:IPR023298;InterPro:IPR044492;InterPro:IPR006122,PARKENT|GeneID=OUR12_000244-T1…
GO:0000172	PARKENT|GeneID=OUR12_009660-T1|Product=Octanoyltransferase LIP2p2, chloroplastic|Dbxref=InterPro:IPR020605;InterPro:IPR045864;InterPro:IPR004143;PFAM:PF21948;InterPro:IPR000544,PARKENT|GeneID=OUR12_012622-T1|Product=hypothetical protein|Dbxref=InterPro:IPR023534;PFAM:PF01868;InterPro:IPR002730;InterPro:IPR016848;InterPro:IPR036980,PARKENT|GeneID=OUR12_014565-T1|Product=hypothetical protein|Dbxref…
GO:0000175	PARKENT|GeneID=OUR12_003067-T1|Product=Carbon catabolite repressor protein 4 4|Dbxref=InterPro:IPR050410;PFAM:PF03372;InterPro:IPR036691;InterPro:IPR005135,PARKENT|GeneID=OUR12_004795-T1|Product=hypothetical protein|Dbxref=InterPro:IPR050410;PFAM:PF03372;InterPro:IPR036691;InterPro:IPR005135,PARKENT|GeneID=OUR12_009008-T1|Product=hypothetical protein|Dbxref=InterPro:IPR051274;PFAM:PF00929;InterPr…
GO:0000176	PARKENT|GeneID=OUR12_004067-T1|Product=hypothetical protein|Dbxref=InterPro:IPR050590;InterPro:IPR020568;InterPro:IPR027408,PARKENT|GeneID=OUR12_004673-T1|Product=exosome non-catalytic core subunit rrp46|Dbxref=InterPro:IPR001247;InterPro:IPR050080;InterPro:IPR020568;InterPro:IPR036345;PFAM:PF01138;InterPro:IPR027408,PARKENT|GeneID=OUR12_004973-T1|Product=hypothetical protein|Dbxref=InterPro:IPR0…
GO:0000177	PARKENT|GeneID=OUR12_004067-T1|Product=hypothetical protein|Dbxref=InterPro:IPR050590;InterPro:IPR020568;InterPro:IPR027408,PARKENT|GeneID=OUR12_004673-T1|Product=exosome non-catalytic core subunit rrp46|Dbxref=InterPro:IPR001247;InterPro:IPR050080;InterPro:IPR020568;InterPro:IPR036345;PFAM:PF01138;InterPro:IPR027408,PARKENT|GeneID=OUR12_004973-T1|Product=hypothetical protein|Dbxref=InterPro:IPR0…
GO:0000178	PARKENT|GeneID=OUR12_005008-T1|Product=hypothetical protein|Dbxref=PFAM:PF04000;InterPro:IPR007146;InterPro:IPR011082,PARKENT|GeneID=OUR12_005250-T1|Product=hypothetical protein|Dbxref=InterPro:IPR012340;InterPro:IPR039771,PARKENT|GeneID=OUR12_019483-T1|Product=hypothetical protein|Dbxref=InterPro:IPR039278,PARKENT|GeneID=OUR12_019484-T1|Product=hypothetical protein|Dbxref=InterPro:IPR039278,PARK…
GO:0000179	PARKENT|GeneID=OUR12_005630-T1|Product=Ribosomal RNA small subunit methyltransferase, mitochondrial|Dbxref=PFAM:PF08242;InterPro:IPR011530;PFAM:PF13649;InterPro:IPR001737;PFAM:PF08241;InterPro:IPR020598;InterPro:IPR029063;PFAM:PF00398,PARKENT|GeneID=OUR12_009928-T1|Product=hypothetical protein|Dbxref=InterPro:IPR011530;PFAM:PF13649;InterPro:IPR020596;InterPro:IPR001737;PFAM:PF08241;InterPro:IPR02…
GO:0000184	PARKENT|GeneID=OUR12_002651-T1|Product=Regulator of nonsense transcripts 1-like protein|Dbxref=InterPro:IPR041677;InterPro:IPR027417;PFAM:PF18141;InterPro:IPR014001;PFAM:PF13245;PFAM:PF13604;InterPro:IPR040812;PFAM:PF09416;InterPro:IPR045055;InterPro:IPR047187;InterPro:IPR041679;PFAM:PF13087;InterPro:IPR018999;InterPro:IPR006935,PARKENT|GeneID=OUR12_003646-T1|Product=Serine/threonine-protein kina…
GO:0000209	PARKENT|GeneID=OUR12_000616-T1|Product=Ubiquitin-conjugating enzyme E2 variant 1A|Dbxref=PFAM:PF00179;InterPro:IPR016135;InterPro:IPR000608,PARKENT|GeneID=OUR12_001102-T1|Product=Ubiquitin-conjugating enzyme E2 2|Dbxref=InterPro:IPR050113;PFAM:PF00179;InterPro:IPR023313;InterPro:IPR016135;InterPro:IPR000608,PARKENT|GeneID=OUR12_001814-T1|Product=Ubiquitin-conjugating enzyme E2 5|Dbxref=InterPro:I…
GO:0000212	PARKENT|GeneID=OUR12_017272-T1|Product=hypothetical protein|Dbxref=InterPro:IPR037500,PARKENT|GeneID=OUR12_023853-T1|Product=Tubulin gamma-1 chain|Dbxref=InterPro:IPR002454;InterPro:IPR008280;InterPro:IPR017975;InterPro:IPR003008;PFAM:PF00091;InterPro:IPR023123;InterPro:IPR037103;InterPro:IPR000217;InterPro:IPR018316;InterPro:IPR036525
GO:0000213	PARKENT|GeneID=OUR12_008219-T1|Product=hypothetical protein|Dbxref=InterPro:IPR006678;InterPro:IPR006676;InterPro:IPR006677;PFAM:PF01974;InterPro:IPR036167;InterPro:IPR011856;PFAM:PF02778
GO:0000214	PARKENT|GeneID=OUR12_008219-T1|Product=hypothetical protein|Dbxref=InterPro:IPR006678;InterPro:IPR006676;InterPro:IPR006677;PFAM:PF01974;InterPro:IPR036167;InterPro:IPR011856;PFAM:PF02778,PARKENT|GeneID=OUR12_013715-T1|Product=hypothetical protein|Dbxref=InterPro:IPR024336;PFAM:PF12928;InterPro:IPR024337
GO:0000215	PARKENT|GeneID=OUR12_023480-T1|Product=hypothetical protein|Dbxref=InterPro:IPR002745;InterPro:IPR042081
GO:0000220	PARKENT|GeneID=OUR12_003145-T1|Product=V-type proton ATPase subunit a2|Dbxref=InterPro:IPR026028;InterPro:IPR002490;PFAM:PF01496,PARKENT|GeneID=OUR12_008226-T1|Product=V-type proton ATPase subunit a1|Dbxref=InterPro:IPR026028;InterPro:IPR002490;PFAM:PF01496
GO:0000221	PARKENT|GeneID=OUR12_022155-T1|Product=V-type proton ATPase subunit C|Dbxref=InterPro:IPR036132;PFAM:PF03223;InterPro:IPR004907,PARKENT|GeneID=OUR12_024151-T1|Product=hypothetical protein|Dbxref=PFAM:PF11698;InterPro:IPR000225;InterPro:IPR011989;InterPro:IPR004908;PFAM:PF03224;InterPro:IPR011987;InterPro:IPR016024;InterPro:IPR038497,PARKENT|GeneID=OUR12_025289-T1|Product=hypothetical protein|Dbxr…
GO:0000225	PARKENT|GeneID=OUR12_010391-T1|Product=hypothetical protein|Dbxref=InterPro:IPR003737;InterPro:IPR024078
GO:0000226	PARKENT|GeneID=OUR12_000690-T1|Product=hypothetical protein|Dbxref=InterPro:IPR007145;PFAM:PF03999,PARKENT|GeneID=OUR12_001619-T1|Product=hypothetical protein|Dbxref=InterPro:IPR007145;PFAM:PF03999,PARKENT|GeneID=OUR12_002186-T1|Product=hypothetical protein|Dbxref=InterPro:IPR002453;InterPro:IPR008280;InterPro:IPR017975;InterPro:IPR003008;PFAM:PF00091;InterPro:IPR023123;InterPro:IPR037103;InterPr…
GO:0000228	PARKENT|GeneID=OUR12_001855-T1|Product=hypothetical protein|Dbxref=InterPro:IPR002815;InterPro:IPR034136;InterPro:IPR036078,PARKENT|GeneID=OUR12_006358-T1|Product=hypothetical protein|Dbxref=InterPro:IPR006939;PFAM:PF04855,PARKENT|GeneID=OUR12_012713-T1|Product=DNA topoisomerase 6 subunit A|Dbxref=InterPro:IPR002815;InterPro:IPR013049;PFAM:PF04406;PFAM:PF21180;InterPro:IPR034136;InterPro:IPR03607…
GO:0000234	PARKENT|GeneID=OUR12_000568-T1|Product=Glycylpeptide N-tetradecanoyltransferase 2|Dbxref=PFAM:PF02353;PFAM:PF08242;PFAM:PF01209;InterPro:IPR025771;PFAM:PF13649;PFAM:PF08241;InterPro:IPR013216;InterPro:IPR029063;InterPro:IPR025714;PFAM:PF13489;PFAM:PF05891;PFAM:PF13847,PARKENT|GeneID=OUR12_025512-T1|Product=hypothetical protein|Dbxref=PFAM:PF08242;InterPro:IPR025771;PFAM:PF13649;PFAM:PF08241;Inter…
GO:0000243	PARKENT|GeneID=OUR12_003431-T1|Product=Small nuclear ribonucleoprotein SmD3b|Dbxref=PFAM:PF01423;InterPro:IPR027141;InterPro:IPR034099;InterPro:IPR010920;InterPro:IPR001163;InterPro:IPR047575,PARKENT|GeneID=OUR12_005483-T1|Product=hypothetical protein|Dbxref=InterPro:IPR006529;InterPro:IPR035979;InterPro:IPR012677;InterPro:IPR000504;PFAM:PF00076,PARKENT|GeneID=OUR12_006965-T1|Product=hypothetical…
GO:0000244	PARKENT|GeneID=OUR12_000947-T1|Product=U4/U6-U5 snRNP complex subunit prp31|Dbxref=InterPro:IPR042239;InterPro:IPR036070;PFAM:PF01798;InterPro:IPR012976;InterPro:IPR002687;PFAM:PF09785;InterPro:IPR019175;InterPro:IPR027105,PARKENT|GeneID=OUR12_014395-T1|Product=Pre-mRNA-processing-splicing factor 8A|Dbxref=PFAM:PF10596;InterPro:IPR019581;PFAM:PF12134;InterPro:IPR012337;InterPro:IPR019582;PFAM:PF0…
GO:0000245	PARKENT|GeneID=OUR12_001940-T1|Product=Crooked neck-like protein 1|Dbxref=PFAM:PF23233;InterPro:IPR003107;PFAM:PF02184;InterPro:IPR045075;PFAM:PF13428;InterPro:IPR011990;PFAM:PF23240;PFAM:PF23241,PARKENT|GeneID=OUR12_001941-T1|Product=Crooked neck-like protein 1|Dbxref=InterPro:IPR003107;PFAM:PF02184;InterPro:IPR045075;InterPro:IPR011990,PARKENT|GeneID=OUR12_009213-T1|Product=hypothetical protein…
GO:0000247	PARKENT|GeneID=OUR12_008053-T1|Product=hypothetical protein|Dbxref=InterPro:IPR033118;InterPro:IPR007905;PFAM:PF05241
GO:0000248	PARKENT|GeneID=OUR12_000417-T1|Product=hypothetical protein|Dbxref=PFAM:PF04116;InterPro:IPR006694;InterPro:IPR050307,PARKENT|GeneID=OUR12_021808-T1|Product=hypothetical protein|Dbxref=PFAM:PF04116;InterPro:IPR006694;InterPro:IPR050307
GO:0000254	PARKENT|GeneID=OUR12_002373-T1|Product=Methylsterol monooxygenase 1-1|Dbxref=PFAM:PF04116;InterPro:IPR006694;InterPro:IPR050307,PARKENT|GeneID=OUR12_008453-T1|Product=Methylsterol monooxygenase 2-2|Dbxref=PFAM:PF04116;InterPro:IPR006694;InterPro:IPR050307,PARKENT|GeneID=OUR12_017346-T1|Product=Very-long-chain aldehyde decarbonylase cer3|Dbxref=InterPro:IPR006694;PFAM:PF04116;InterPro:IPR021940;In…
GO:0000256	PARKENT|GeneID=OUR12_015587-T1|Product=hypothetical protein|Dbxref=InterPro:IPR032466;InterPro:IPR006680;InterPro:IPR011059;PFAM:PF01979;PFAM:PF24890;InterPro:IPR050138;InterPro:IPR017593
GO:0000257	PARKENT|GeneID=OUR12_002919-T1|Product=Nitrilase|Dbxref=InterPro:IPR000132;PFAM:PF00795;InterPro:IPR044149;InterPro:IPR036526;InterPro:IPR003010,PARKENT|GeneID=OUR12_002982-T1|Product=Nitrilase|Dbxref=InterPro:IPR000132;PFAM:PF00795;InterPro:IPR044149;InterPro:IPR036526;InterPro:IPR003010,PARKENT|GeneID=OUR12_009395-T1|Product=Bifunctional nitrilase/nitrile hydratase nit4b|Dbxref=InterPro:IPR0001…
GO:0000266	PARKENT|GeneID=OUR12_009380-T1|Product=hypothetical protein|Dbxref=PFAM:PF06258;InterPro:IPR009367,PARKENT|GeneID=OUR12_013047-T1|Product=serine/threonine protein kinase|Dbxref=PFAM:PF06258;InterPro:IPR009367,PARKENT|GeneID=OUR12_013351-T1|Product=Mitochondrial fission 1 protein A|Dbxref=InterPro:IPR033745;InterPro:IPR028061;PFAM:PF14852;PFAM:PF14853;InterPro:IPR028058;InterPro:IPR011990;InterPro…
GO:0000272	PARKENT|GeneID=OUR12_000773-T1|Product=hypothetical protein|Dbxref=InterPro:IPR017853;InterPro:IPR035992;InterPro:IPR000772;InterPro:IPR001547;PFAM:PF00150,PARKENT|GeneID=OUR12_001877-T1|Product=hypothetical protein|Dbxref=InterPro:IPR017853;InterPro:IPR035992;InterPro:IPR000772;InterPro:IPR001547;PFAM:PF00150,PARKENT|GeneID=OUR12_001878-T1|Product=hypothetical protein|Dbxref=InterPro:IPR017853;I…
GO:0000274	PARKENT|GeneID=OUR12_019743-T1|Product=hypothetical protein|Dbxref=InterPro:IPR036228;PFAM:PF05873;InterPro:IPR008689,PARKENT|GeneID=OUR12_020642-T1|Product=hypothetical protein|Dbxref=PFAM:PF00213;InterPro:IPR020781;InterPro:IPR026015;InterPro:IPR000711
GO:0000275	PARKENT|GeneID=OUR12_015080-T1|Product=hypothetical protein|Dbxref=PFAM:PF00231;InterPro:IPR035968;InterPro:IPR000131;InterPro:IPR023632,PARKENT|GeneID=OUR12_015081-T1|Product=hypothetical protein|Dbxref=InterPro:IPR000131,PARKENT|GeneID=OUR12_023293-T1|Product=hypothetical protein|Dbxref=InterPro:IPR020546;InterPro:IPR001469;InterPro:IPR036771;PFAM:PF02823,PARKENT|GeneID=OUR12_026084-T1|Product=…
GO:0000276	PARKENT|GeneID=OUR12_004375-T1|Product=hypothetical protein|Dbxref=InterPro:IPR006808;PFAM:PF04718,PARKENT|GeneID=OUR12_013986-T1|Product=hypothetical protein|Dbxref=InterPro:IPR006808;PFAM:PF04718,PARKENT|GeneID=OUR12_029454-T1|Product=hypothetical protein|Dbxref=InterPro:IPR006808;PFAM:PF04718
GO:0000278	PARKENT|GeneID=OUR12_001029-T1|Product=Serine/threonine-protein phosphatase pp2a catalytic subunit|Dbxref=InterPro:IPR029052;InterPro:IPR004843;InterPro:IPR006186;InterPro:IPR047129;PFAM:PF00149,PARKENT|GeneID=OUR12_002186-T1|Product=hypothetical protein|Dbxref=InterPro:IPR002453;InterPro:IPR008280;InterPro:IPR017975;InterPro:IPR003008;PFAM:PF00091;InterPro:IPR023123;InterPro:IPR037103;InterPro:I…
GO:0000285	PARKENT|GeneID=OUR12_000521-T1|Product=hypothetical protein|Dbxref=PFAM:PF01504;InterPro:IPR027483;InterPro:IPR044769;InterPro:IPR002498;InterPro:IPR027484,PARKENT|GeneID=OUR12_000522-T1|Product=hypothetical protein|Dbxref=InterPro:IPR013083;InterPro:IPR002423;InterPro:IPR027409;InterPro:IPR017455;InterPro:IPR011011,PARKENT|GeneID=OUR12_005379-T1|Product=hypothetical protein|Dbxref=InterPro:IPR02…
GO:0000287	PARKENT|GeneID=OUR12_000269-T1|Product=Putative phospholipid-transporting ATPase 9|Dbxref=InterPro:IPR008250;PFAM:PF16209;InterPro:IPR023299;InterPro:IPR001757;PFAM:PF16212;InterPro:IPR023214;InterPro:IPR032630;InterPro:IPR036412;PFAM:PF13246;InterPro:IPR006539;InterPro:IPR032631;InterPro:IPR018303;InterPro:IPR023298;InterPro:IPR044492,PARKENT|GeneID=OUR12_000586-T1|Product=Phosphoglucomutase-1|D…
GO:0000288	PARKENT|GeneID=OUR12_021758-T1|Product=hypothetical protein|Dbxref=InterPro:IPR024557;InterPro:IPR040398,PARKENT|GeneID=OUR12_023435-T1|Product=hypothetical protein|Dbxref=PFAM:PF12842;PFAM:PF16415;InterPro:IPR024557;InterPro:IPR040398;InterPro:IPR032191,PARKENT|GeneID=OUR12_023436-T1|Product=CCR4-NOT transcription complex subunit 1|Dbxref=InterPro:IPR040398;InterPro:IPR007196;PFAM:PF04054,PARKEN…
GO:0000289	PARKENT|GeneID=OUR12_002249-T1|Product=hypothetical protein|Dbxref=InterPro:IPR007282;InterPro:IPR038635;PFAM:PF04153;InterPro:IPR040168,PARKENT|GeneID=OUR12_008279-T1|Product=Probable NOT transcription complex subunit vip2|Dbxref=InterPro:IPR038635;InterPro:IPR040168,PARKENT|GeneID=OUR12_013505-T1|Product=Carbon catabolite repressor protein 4 1|Dbxref=InterPro:IPR050410;PFAM:PF03372;InterPro:IPR…
GO:0000290	PARKENT|GeneID=OUR12_004176-T1|Product=hypothetical protein|Dbxref=InterPro:IPR039900,PARKENT|GeneID=OUR12_004177-T1|Product=Protein PAT1 1|Dbxref=InterPro:IPR039900,PARKENT|GeneID=OUR12_009383-T1|Product=hypothetical protein|Dbxref=PFAM:PF06058;InterPro:IPR011993;InterPro:IPR010334,PARKENT|GeneID=OUR12_009384-T1|Product=hypothetical protein|Dbxref=InterPro:IPR010334,PARKENT|GeneID=OUR12_013045-T…
GO:0000291	PARKENT|GeneID=OUR12_008457-T1|Product=hypothetical protein|Dbxref=InterPro:IPR012340;PFAM:PF03876;InterPro:IPR005576;InterPro:IPR036898;InterPro:IPR003029;PFAM:PF00575;InterPro:IPR045113
GO:0000293	PARKENT|GeneID=OUR12_023911-T1|Product=hypothetical protein|Dbxref=InterPro:IPR050369,PARKENT|GeneID=OUR12_023913-T1|Product=hypothetical protein|Dbxref=PFAM:PF01794;InterPro:IPR050369;InterPro:IPR013130,PARKENT|GeneID=OUR12_024864-T1|Product=hypothetical protein|Dbxref=PFAM:PF08022;InterPro:IPR013112;InterPro:IPR017927;InterPro:IPR039261;InterPro:IPR013130;InterPro:IPR050369;PFAM:PF01794;InterPr…
GO:0000301	PARKENT|GeneID=OUR12_016805-T1|Product=Complement component 1 Q subcomponent-binding protein, mitochondrial|Dbxref=InterPro:IPR019177,PARKENT|GeneID=OUR12_016806-T1|Product=hypothetical protein|Dbxref=InterPro:IPR019177,PARKENT|GeneID=OUR12_025524-T1|Product=hypothetical protein|Dbxref=InterPro:IPR019177;PFAM:PF09787
GO:0000302	PARKENT|GeneID=OUR12_003310-T1|Product=L-ascorbate peroxidase 3|Dbxref=InterPro:IPR010255;InterPro:IPR002207;InterPro:IPR044831;InterPro:IPR019793;InterPro:IPR002016;PFAM:PF00141,PARKENT|GeneID=OUR12_004890-T1|Product=hypothetical protein|Dbxref=InterPro:IPR019794;InterPro:IPR010255;InterPro:IPR044831;InterPro:IPR019793;InterPro:IPR002016;PFAM:PF00141,PARKENT|GeneID=OUR12_005744-T1|Product=hypoth…
GO:0000304	PARKENT|GeneID=OUR12_017467-T1|Product=executer 1|Dbxref=InterPro:IPR043141;InterPro:IPR001790;PFAM:PF00466;InterPro:IPR044680,PARKENT|GeneID=OUR12_026181-T1|Product=executer 1|Dbxref=PFAM:PF12014;InterPro:IPR044680
GO:0000306	PARKENT|GeneID=OUR12_000625-T1|Product=PtdIns(3,5)P(2) sythesis regulation factor|Dbxref=PFAM:PF12755;InterPro:IPR021133;InterPro:IPR011989;PFAM:PF02985;InterPro:IPR021841;InterPro:IPR026825;PFAM:PF11916;InterPro:IPR016024,PARKENT|GeneID=OUR12_000626-T1|Product=hypothetical protein|Dbxref=InterPro:IPR011989;InterPro:IPR026825
GO:0000307	PARKENT|GeneID=OUR12_000659-T1|Product=hypothetical protein|Dbxref=InterPro:IPR039361;InterPro:IPR036915;PFAM:PF02984;InterPro:IPR006671;InterPro:IPR013763;InterPro:IPR004367,PARKENT|GeneID=OUR12_000988-T1|Product=Cyclin-D1-1|Dbxref=InterPro:IPR039361;InterPro:IPR036915;PFAM:PF02984;InterPro:IPR006671;InterPro:IPR013763;InterPro:IPR048258;InterPro:IPR004367;PFAM:PF00134,PARKENT|GeneID=OUR12_00335…
GO:0000309	PARKENT|GeneID=OUR12_000432-T1|Product=hypothetical protein|Dbxref=InterPro:IPR014729;InterPro:IPR004821;PFAM:PF01467,PARKENT|GeneID=OUR12_000433-T1|Product=hypothetical protein|Dbxref=InterPro:IPR036653,PARKENT|GeneID=OUR12_029773-T1|Product=hypothetical protein|Dbxref=InterPro:IPR004821;InterPro:IPR005248;PFAM:PF01467;InterPro:IPR051182;InterPro:IPR014729
GO:0000312	PARKENT|GeneID=OUR12_027675-T1|Product=40S ribosomal protein S9|Dbxref=InterPro:IPR014721;InterPro:IPR000754;InterPro:IPR020568;InterPro:IPR020574;PFAM:PF00380
GO:0000323	PARKENT|GeneID=OUR12_023968-T1|Product=hypothetical protein|Dbxref=,PARKENT|GeneID=OUR12_027005-T1|Product=hypothetical protein|Dbxref=InterPro:IPR018791;PFAM:PF10186
GO:0000325	PARKENT|GeneID=OUR12_000629-T1|Product=E3 ubiquitin protein ligase rie1|Dbxref=InterPro:IPR013083;PFAM:PF13923;PFAM:PF12678;PFAM:PF13639;PFAM:PF17123;InterPro:IPR001841;PFAM:PF00097,PARKENT|GeneID=OUR12_002256-T1|Product=hypothetical protein|Dbxref=InterPro:IPR013083;PFAM:PF12678;PFAM:PF13639;PFAM:PF17123;PFAM:PF00097;InterPro:IPR001841,PARKENT|GeneID=OUR12_004574-T1|Product=hypothetical protein|…
GO:0000333	PARKENT|GeneID=OUR12_020643-T1|Product=hypothetical protein|Dbxref=PFAM:PF21399;InterPro:IPR049139;InterPro:IPR000477;InterPro:IPR021891;InterPro:IPR003545,PARKENT|GeneID=OUR12_020644-T1|Product=hypothetical protein|Dbxref=InterPro:IPR003545
GO:0000338	PARKENT|GeneID=OUR12_003505-T1|Product=COP9 signalosome complex subunit 5a|Dbxref=InterPro:IPR040961;InterPro:IPR037518;PFAM:PF18323;InterPro:IPR000555;InterPro:IPR050242;PFAM:PF01398,PARKENT|GeneID=OUR12_008225-T1|Product=hypothetical protein|Dbxref=InterPro:IPR044613;InterPro:IPR003653;InterPro:IPR038765,PARKENT|GeneID=OUR12_012052-T1|Product=COP9 signalosome complex subunit 2|Dbxref=InterPro:I…
GO:0000339	PARKENT|GeneID=OUR12_009095-T1|Product=Nucleic acid dioxygenase ALKBH1|Dbxref=PFAM:PF02854;InterPro:IPR027159;InterPro:IPR016024;InterPro:IPR015172;InterPro:IPR003890,PARKENT|GeneID=OUR12_011903-T1|Product=hypothetical protein|Dbxref=InterPro:IPR006607;InterPro:IPR036390;InterPro:IPR045180;InterPro:IPR006630;PFAM:PF05383;InterPro:IPR036388,PARKENT|GeneID=OUR12_011904-T1|Product=La-related protein…
GO:0000340	PARKENT|GeneID=OUR12_005273-T1|Product=hypothetical protein|Dbxref=InterPro:IPR008081,PARKENT|GeneID=OUR12_005274-T1|Product=hypothetical protein|Dbxref=InterPro:IPR008081,PARKENT|GeneID=OUR12_005275-T1|Product=hypothetical protein|Dbxref=InterPro:IPR008081,PARKENT|GeneID=OUR12_006988-T1|Product=Eukaryotic translation initiation factor isoform 4E|Dbxref=PFAM:PF01652;InterPro:IPR023398;InterPro:IP…
GO:0000346	PARKENT|GeneID=OUR12_016666-T1|Product=THO complex subunit 6|Dbxref=InterPro:IPR036322;InterPro:IPR042626;PFAM:PF00400;InterPro:IPR001680;InterPro:IPR015943
GO:0000347	PARKENT|GeneID=OUR12_000664-T1|Product=hypothetical protein|Dbxref=InterPro:IPR040007;InterPro:IPR021418;InterPro:IPR021726;PFAM:PF11732,PARKENT|GeneID=OUR12_000665-T1|Product=THO complex subunit 2|Dbxref=InterPro:IPR040007;InterPro:IPR032302;InterPro:IPR021726;PFAM:PF11732,PARKENT|GeneID=OUR12_000666-T1|Product=hypothetical protein|Dbxref=InterPro:IPR040007;InterPro:IPR032302,PARKENT|GeneID=OUR1…
GO:0000349	PARKENT|GeneID=OUR12_015509-T1|Product=hypothetical protein|Dbxref=PFAM:PF23233;PFAM:PF23220;InterPro:IPR003107;InterPro:IPR045075;InterPro:IPR008847;PFAM:PF23231;InterPro:IPR011990;PFAM:PF23240
GO:0000350	PARKENT|GeneID=OUR12_005921-T1|Product=hypothetical protein|Dbxref=PFAM:PF06246;InterPro:IPR029012;InterPro:IPR009360;InterPro:IPR037200,PARKENT|GeneID=OUR12_009567-T1|Product=hypothetical protein|Dbxref=PFAM:PF08799;InterPro:IPR004098;InterPro:IPR036285;InterPro:IPR014906;InterPro:IPR039979
GO:0000373	PARKENT|GeneID=OUR12_000870-T1|Product=CRS2-associated factor 2|Dbxref=InterPro:IPR044599;InterPro:IPR001890;PFAM:PF01985;InterPro:IPR035920,PARKENT|GeneID=OUR12_003478-T1|Product=hypothetical protein|Dbxref=InterPro:IPR044190;PFAM:PF13041;PFAM:PF13812;InterPro:IPR002885;InterPro:IPR011990,PARKENT|GeneID=OUR12_003710-T1|Product=Pentatricopeptide repeat-containing protein|Dbxref=PFAM:PF03161;Inter…
GO:0000375	PARKENT|GeneID=OUR12_006793-T1|Product=Chloroplastic group IIA intron splicing facilitator CRS1|Dbxref=InterPro:IPR001890;InterPro:IPR045278;PFAM:PF01985;InterPro:IPR035920,PARKENT|GeneID=OUR12_016686-T1|Product=hypothetical protein|Dbxref=InterPro:IPR001890;InterPro:IPR045278;PFAM:PF01985;InterPro:IPR035920,PARKENT|GeneID=OUR12_021807-T1|Product=hypothetical protein|Dbxref=InterPro:IPR045278,PAR…
GO:0000379	PARKENT|GeneID=OUR12_008219-T1|Product=hypothetical protein|Dbxref=InterPro:IPR006678;InterPro:IPR006676;InterPro:IPR006677;PFAM:PF01974;InterPro:IPR036167;InterPro:IPR011856;PFAM:PF02778,PARKENT|GeneID=OUR12_013715-T1|Product=hypothetical protein|Dbxref=InterPro:IPR024336;PFAM:PF12928;InterPro:IPR024337
GO:0000380	PARKENT|GeneID=OUR12_012433-T1|Product=hypothetical protein|Dbxref=PFAM:PF00397;InterPro:IPR036020;InterPro:IPR001202,PARKENT|GeneID=OUR12_026112-T1|Product=hypothetical protein|Dbxref=InterPro:IPR034604
GO:0000381	PARKENT|GeneID=OUR12_000212-T1|Product=hypothetical protein|Dbxref=PFAM:PF01805;PFAM:PF00240;InterPro:IPR035967;InterPro:IPR022030;InterPro:IPR029071;PFAM:PF12230;InterPro:IPR000626;InterPro:IPR035563;InterPro:IPR000061;InterPro:IPR045146,PARKENT|GeneID=OUR12_009412-T1|Product=hypothetical protein|Dbxref=InterPro:IPR018612,PARKENT|GeneID=OUR12_026259-T1|Product=hypothetical protein|Dbxref=InterPr…
GO:0000387	PARKENT|GeneID=OUR12_000657-T1|Product=mRNA splicing protein|Dbxref=PFAM:PF01423;InterPro:IPR027248;InterPro:IPR010920;InterPro:IPR001163;InterPro:IPR047575,PARKENT|GeneID=OUR12_000785-T1|Product=hypothetical protein|Dbxref=InterPro:IPR024822;InterPro:IPR031722;PFAM:PF15862;PFAM:PF23086,PARKENT|GeneID=OUR12_003431-T1|Product=Small nuclear ribonucleoprotein SmD3b|Dbxref=PFAM:PF01423;InterPro:IPR02…
GO:0000389	PARKENT|GeneID=OUR12_005921-T1|Product=hypothetical protein|Dbxref=PFAM:PF06246;InterPro:IPR029012;InterPro:IPR009360;InterPro:IPR037200
GO:0000390	PARKENT|GeneID=OUR12_011880-T1|Product=hypothetical protein|Dbxref=InterPro:IPR001650;InterPro:IPR044762;InterPro:IPR049621;InterPro:IPR003029;PFAM:PF00575;PFAM:PF00271;PFAM:PF21010;PFAM:PF07717;InterPro:IPR014001;InterPro:IPR011709;InterPro:IPR027417;PFAM:PF00270;InterPro:IPR012340;PFAM:PF04408;InterPro:IPR007502;InterPro:IPR049588;InterPro:IPR011545;PFAM:PF13401;InterPro:IPR048333;InterPro:IPR0…
GO:0000395	PARKENT|GeneID=OUR12_009696-T1|Product=hypothetical protein|Dbxref=InterPro:IPR000690;InterPro:IPR036236;InterPro:IPR017340;InterPro:IPR013085;InterPro:IPR003604;PFAM:PF06220,PARKENT|GeneID=OUR12_010256-T1|Product=hypothetical protein|Dbxref=PFAM:PF23233;InterPro:IPR003107;InterPro:IPR008847;InterPro:IPR011990;PFAM:PF23240;PFAM:PF23241,PARKENT|GeneID=OUR12_029619-T1|Product=hypothetical protein|D…
GO:0000398	PARKENT|GeneID=OUR12_000308-T1|Product=hypothetical protein|Dbxref=PFAM:PF04502;InterPro:IPR007590,PARKENT|GeneID=OUR12_000315-T1|Product=hypothetical protein|Dbxref=PFAM:PF07842;InterPro:IPR012890;InterPro:IPR022783,PARKENT|GeneID=OUR12_000931-T1|Product=hypothetical protein|Dbxref=InterPro:IPR036322;InterPro:IPR020472;InterPro:IPR019775;PFAM:PF00400;InterPro:IPR001680;InterPro:IPR032847;InterPr…
GO:0000400	PARKENT|GeneID=OUR12_001215-T1|Product=hypothetical protein|Dbxref=InterPro:IPR027417,PARKENT|GeneID=OUR12_008237-T1|Product=DNA repair protein RAD51|Dbxref=InterPro:IPR027417;InterPro:IPR030548;PFAM:PF26169;InterPro:IPR016467;InterPro:IPR020588;InterPro:IPR013632;InterPro:IPR003593,PARKENT|GeneID=OUR12_008297-T1|Product=hypothetical protein|Dbxref=InterPro:IPR027417;PFAM:PF08423;InterPro:IPR0205…
GO:0000407	PARKENT|GeneID=OUR12_003724-T1|Product=hypothetical protein|Dbxref=InterPro:IPR026854;InterPro:IPR026849,PARKENT|GeneID=OUR12_003725-T1|Product=hypothetical protein|Dbxref=InterPro:IPR015412;InterPro:IPR026885;InterPro:IPR026849,PARKENT|GeneID=OUR12_005929-T1|Product=hypothetical protein|Dbxref=PFAM:PF10033;InterPro:IPR018731;InterPro:IPR036570;InterPro:IPR040182,PARKENT|GeneID=OUR12_005934-T1|Pr…
GO:0000408	PARKENT|GeneID=OUR12_003735-T1|Product=hypothetical protein|Dbxref=InterPro:IPR013926;PFAM:PF08617;InterPro:IPR036504,PARKENT|GeneID=OUR12_007575-T1|Product=Gcp2p|Dbxref=InterPro:IPR034680;PFAM:PF00814;InterPro:IPR043129;InterPro:IPR000905;InterPro:IPR017861,PARKENT|GeneID=OUR12_009532-T1|Product=hypothetical protein|Dbxref=PFAM:PF06293;InterPro:IPR008266;PFAM:PF01163;InterPro:IPR000719;InterPro:…
GO:0000413	PARKENT|GeneID=OUR12_001119-T1|Product=cytochrome P450 monooxygenase 23|Dbxref=InterPro:IPR044233;InterPro:IPR002130;InterPro:IPR029000,PARKENT|GeneID=OUR12_001120-T1|Product=cytochrome P450 monooxygenase 23|Dbxref=PFAM:PF00160;InterPro:IPR044233;InterPro:IPR002130;InterPro:IPR029000,PARKENT|GeneID=OUR12_001684-T1|Product=Photosynthetic NDH subunit of lumenal location 5, chloroplastic|Dbxref=PFAM…
GO:0000417	PARKENT|GeneID=OUR12_009308-T1|Product=hypothetical protein|Dbxref=InterPro:IPR036322;PFAM:PF07569;InterPro:IPR011494;InterPro:IPR019775;PFAM:PF00400;InterPro:IPR015943;InterPro:IPR001680;InterPro:IPR031120;PFAM:PF24105
GO:0000419	PARKENT|GeneID=OUR12_006681-T1|Product=Protein rdm1|Dbxref=InterPro:IPR036319;PFAM:PF09187;InterPro:IPR015270,PARKENT|GeneID=OUR12_019517-T1|Product=RNA-directed DNA methylation 1|Dbxref=InterPro:IPR036319;PFAM:PF09187;InterPro:IPR015270
GO:0000421	PARKENT|GeneID=OUR12_026332-T1|Product=hypothetical protein|Dbxref=InterPro:IPR036322;InterPro:IPR020472;InterPro:IPR019775;PFAM:PF00400;InterPro:IPR001680;InterPro:IPR045160;InterPro:IPR015943,PARKENT|GeneID=OUR12_026333-T1|Product=autophagy protein 16, interacts with Atg12p-Atg5p|Dbxref=PFAM:PF12894;InterPro:IPR036322;PFAM:PF08614;InterPro:IPR013923;InterPro:IPR020472;InterPro:IPR019775;PFAM:PF…
GO:0000422	PARKENT|GeneID=OUR12_002831-T1|Product=autophagy protein 5|Dbxref=InterPro:IPR042527;InterPro:IPR007239;InterPro:IPR048940;InterPro:IPR048939;PFAM:PF20638;PFAM:PF20637;InterPro:IPR042526;PFAM:PF04106;InterPro:IPR048318,PARKENT|GeneID=OUR12_003724-T1|Product=hypothetical protein|Dbxref=InterPro:IPR026854;InterPro:IPR026849,PARKENT|GeneID=OUR12_003725-T1|Product=hypothetical protein|Dbxref=InterPro…
GO:0000423	PARKENT|GeneID=OUR12_005929-T1|Product=hypothetical protein|Dbxref=PFAM:PF10033;InterPro:IPR018731;InterPro:IPR036570;InterPro:IPR040182,PARKENT|GeneID=OUR12_025092-T1|Product=hypothetical protein|Dbxref=PFAM:PF10033;InterPro:IPR018731;InterPro:IPR036570;InterPro:IPR040182
GO:0000427	PARKENT|GeneID=OUR12_000122-T1|Product=hypothetical protein|Dbxref=InterPro:IPR050600;InterPro:IPR013219;PFAM:PF00856;PFAM:PF08293;InterPro:IPR046341;InterPro:IPR036464;InterPro:IPR001214;InterPro:IPR015353,PARKENT|GeneID=OUR12_025434-T1|Product=hypothetical protein|Dbxref=InterPro:IPR044967,PARKENT|GeneID=OUR12_025435-T1|Product=Protein PLASTID TRANSCRIPTIONALLY ACTIVE 10|Dbxref=InterPro:IPR0449…
GO:0000439	PARKENT|GeneID=OUR12_002369-T1|Product=TFIIH complex subunit tfb5|Dbxref=InterPro:IPR035935;PFAM:PF06331;InterPro:IPR009400,PARKENT|GeneID=OUR12_008190-T1|Product=General transcription factor IIH subunit 2|Dbxref=InterPro:IPR007198;PFAM:PF04056;PFAM:PF13519;InterPro:IPR036465;InterPro:IPR012170;InterPro:IPR002035,PARKENT|GeneID=OUR12_015585-T1|Product=RNA polymerase II transcription factor B 52 k…
GO:0000444	PARKENT|GeneID=OUR12_003100-T1|Product=hypothetical protein|Dbxref=InterPro:IPR007128
GO:0000445	PARKENT|GeneID=OUR12_000664-T1|Product=hypothetical protein|Dbxref=InterPro:IPR040007;InterPro:IPR021418;InterPro:IPR021726;PFAM:PF11732,PARKENT|GeneID=OUR12_000665-T1|Product=THO complex subunit 2|Dbxref=InterPro:IPR040007;InterPro:IPR032302;InterPro:IPR021726;PFAM:PF11732,PARKENT|GeneID=OUR12_000666-T1|Product=hypothetical protein|Dbxref=InterPro:IPR040007;InterPro:IPR032302,PARKENT|GeneID=OUR1…
GO:0000447	PARKENT|GeneID=OUR12_005395-T1|Product=hypothetical protein|Dbxref=InterPro:IPR024626;InterPro:IPR018034;PFAM:PF05178;PFAM:PF12936,PARKENT|GeneID=OUR12_006411-T1|Product=Small ribosomal subunit protein eS21y|Dbxref=InterPro:IPR038579;PFAM:PF01249;InterPro:IPR001931,PARKENT|GeneID=OUR12_013760-T1|Product=hypothetical protein|Dbxref=InterPro:IPR001313;InterPro:IPR040000;InterPro:IPR011989;InterPro:…
GO:0000448	PARKENT|GeneID=OUR12_025860-T1|Product=hypothetical protein|Dbxref=InterPro:IPR027417;InterPro:IPR045116,PARKENT|GeneID=OUR12_025861-T1|Product=hypothetical protein|Dbxref=InterPro:IPR027417;InterPro:IPR045116;InterPro:IPR032319,PARKENT|GeneID=OUR12_025863-T1|Product=hypothetical protein|Dbxref=InterPro:IPR027417;PFAM:PF25467;PFAM:PF16575;InterPro:IPR032319;InterPro:IPR045116
GO:0000454	PARKENT|GeneID=OUR12_013549-T1|Product=hypothetical protein|Dbxref=InterPro:IPR038664
GO:0000455	PARKENT|GeneID=OUR12_003809-T1|Product=hypothetical protein|Dbxref=InterPro:IPR006145;InterPro:IPR020103;PFAM:PF00849;InterPro:IPR050188,PARKENT|GeneID=OUR12_013022-T1|Product=hypothetical protein|Dbxref=InterPro:IPR050188;InterPro:IPR020103,PARKENT|GeneID=OUR12_014900-T1|Product=hypothetical protein|Dbxref=InterPro:IPR006145;InterPro:IPR020103;PFAM:PF00849;InterPro:IPR050188,PARKENT|GeneID=OUR12…
GO:0000460	PARKENT|GeneID=OUR12_005008-T1|Product=hypothetical protein|Dbxref=PFAM:PF04000;InterPro:IPR007146;InterPro:IPR011082,PARKENT|GeneID=OUR12_008912-T1|Product=Exosome RNA helicase MTR4|Dbxref=InterPro:IPR016438;InterPro:IPR027417;PFAM:PF22527;InterPro:IPR001650;InterPro:IPR014001;InterPro:IPR048392;InterPro:IPR050699;PFAM:PF00270;PFAM:PF21408;PFAM:PF08148;PFAM:PF04851;InterPro:IPR025696;PFAM:PF1323…
GO:0000461	PARKENT|GeneID=OUR12_006411-T1|Product=Small ribosomal subunit protein eS21y|Dbxref=InterPro:IPR038579;PFAM:PF01249;InterPro:IPR001931
GO:0000462	PARKENT|GeneID=OUR12_000186-T1|Product=hypothetical protein|Dbxref=InterPro:IPR053940;InterPro:IPR010678,PARKENT|GeneID=OUR12_002283-T1|Product=hypothetical protein|Dbxref=InterPro:IPR009292;PFAM:PF06102,PARKENT|GeneID=OUR12_003766-T1|Product=40S ribosomal protein S16|Dbxref=InterPro:IPR014721;InterPro:IPR000754;InterPro:IPR020568;InterPro:IPR020574;PFAM:PF00380,PARKENT|GeneID=OUR12_003792-T1|Pro…
GO:0000463	PARKENT|GeneID=OUR12_003529-T1|Product=hypothetical protein|Dbxref=InterPro:IPR015507;InterPro:IPR024576;PFAM:PF11861;InterPro:IPR028589;InterPro:IPR050082;InterPro:IPR029063;InterPro:IPR002877;PFAM:PF07780;PFAM:PF01728;InterPro:IPR012920,PARKENT|GeneID=OUR12_003945-T1|Product=hypothetical protein|Dbxref=PFAM:PF25790;InterPro:IPR008030;InterPro:IPR051639;InterPro:IPR036291;PFAM:PF13460,PARKENT|Ge…
GO:0000466	PARKENT|GeneID=OUR12_003529-T1|Product=hypothetical protein|Dbxref=InterPro:IPR015507;InterPro:IPR024576;PFAM:PF11861;InterPro:IPR028589;InterPro:IPR050082;InterPro:IPR029063;InterPro:IPR002877;PFAM:PF07780;PFAM:PF01728;InterPro:IPR012920
GO:0000467	PARKENT|GeneID=OUR12_004067-T1|Product=hypothetical protein|Dbxref=InterPro:IPR050590;InterPro:IPR020568;InterPro:IPR027408,PARKENT|GeneID=OUR12_004973-T1|Product=hypothetical protein|Dbxref=InterPro:IPR001247;InterPro:IPR015847;InterPro:IPR020568;InterPro:IPR036345;InterPro:IPR050590;PFAM:PF01138;PFAM:PF03725;InterPro:IPR027408,PARKENT|GeneID=OUR12_011963-T1|Product=hypothetical protein|Dbxref=I…
GO:0000469	PARKENT|GeneID=OUR12_025763-T1|Product=hypothetical protein|Dbxref=InterPro:IPR050257;InterPro:IPR002415;InterPro:IPR029064;InterPro:IPR004038;PFAM:PF01248;InterPro:IPR018492
GO:0000470	PARKENT|GeneID=OUR12_009341-T1|Product=60S ribosomal protein L10A|Dbxref=InterPro:IPR016095;InterPro:IPR050257;PFAM:PF00687;InterPro:IPR023674;InterPro:IPR023673;InterPro:IPR028364;InterPro:IPR002143,PARKENT|GeneID=OUR12_011669-T1|Product=eukaryotic translation initiation factor 6|Dbxref=InterPro:IPR002769;PFAM:PF01912,PARKENT|GeneID=OUR12_011771-T1|Product=hypothetical protein|Dbxref=InterPro:IP…
GO:0000472	PARKENT|GeneID=OUR12_005312-T1|Product=hypothetical protein|Dbxref=InterPro:IPR036322;InterPro:IPR019775;PFAM:PF00400;InterPro:IPR001680;InterPro:IPR015943,PARKENT|GeneID=OUR12_013760-T1|Product=hypothetical protein|Dbxref=InterPro:IPR001313;InterPro:IPR040000;InterPro:IPR011989;InterPro:IPR016024;PFAM:PF00806;PFAM:PF22493,PARKENT|GeneID=OUR12_024157-T1|Product=hypothetical protein|Dbxref=InterPr…
GO:0000479	PARKENT|GeneID=OUR12_007271-T1|Product=Glycoside hydrolase 2 (Mannanase, beta-galactosidase)|Dbxref=InterPro:IPR039761;PFAM:PF04950;InterPro:IPR007034,PARKENT|GeneID=OUR12_007272-T1|Product=Glycoside hydrolase 2 (Mannanase, beta-galactosidase)|Dbxref=InterPro:IPR039761;InterPro:IPR030387;InterPro:IPR037875;InterPro:IPR027417;PFAM:PF08142;InterPro:IPR012948,PARKENT|GeneID=OUR12_021296-T1|Product=h…
GO:0000480	PARKENT|GeneID=OUR12_005312-T1|Product=hypothetical protein|Dbxref=InterPro:IPR036322;InterPro:IPR019775;PFAM:PF00400;InterPro:IPR001680;InterPro:IPR015943,PARKENT|GeneID=OUR12_013760-T1|Product=hypothetical protein|Dbxref=InterPro:IPR001313;InterPro:IPR040000;InterPro:IPR011989;InterPro:IPR016024;PFAM:PF00806;PFAM:PF22493,PARKENT|GeneID=OUR12_024157-T1|Product=hypothetical protein|Dbxref=InterPr…
GO:0000481	PARKENT|GeneID=OUR12_017485-T1|Product=ESCRT II complex subunit Dot2|Dbxref=PFAM:PF03343;InterPro:IPR005011
GO:0000488	PARKENT|GeneID=OUR12_019855-T1|Product=hypothetical protein|Dbxref=InterPro:IPR050343;InterPro:IPR036986;PFAM:PF01479;InterPro:IPR002942,PARKENT|GeneID=OUR12_019856-T1|Product=Putative ribosomal large subunit pseudouridine synthase svr1, chloroplastic|Dbxref=InterPro:IPR006145;InterPro:IPR042092;InterPro:IPR018496;PFAM:PF00849;InterPro:IPR050343;InterPro:IPR020103;InterPro:IPR020094
GO:0000489	PARKENT|GeneID=OUR12_019855-T1|Product=hypothetical protein|Dbxref=InterPro:IPR050343;InterPro:IPR036986;PFAM:PF01479;InterPro:IPR002942,PARKENT|GeneID=OUR12_019856-T1|Product=Putative ribosomal large subunit pseudouridine synthase svr1, chloroplastic|Dbxref=InterPro:IPR006145;InterPro:IPR042092;InterPro:IPR018496;PFAM:PF00849;InterPro:IPR050343;InterPro:IPR020103;InterPro:IPR020094
GO:0000492	PARKENT|GeneID=OUR12_003945-T1|Product=hypothetical protein|Dbxref=PFAM:PF25790;InterPro:IPR008030;InterPro:IPR051639;InterPro:IPR036291;PFAM:PF13460,PARKENT|GeneID=OUR12_003978-T1|Product=hypothetical protein|Dbxref=PFAM:PF15370;InterPro:IPR027921,PARKENT|GeneID=OUR12_008156-T1|Product=Ras and Rab interactor 1|Dbxref=InterPro:IPR027417;InterPro:IPR027238;PFAM:PF06068;InterPro:IPR041048;InterPro:…
GO:0000494	PARKENT|GeneID=OUR12_024854-T1|Product=fibrillarin|Dbxref=InterPro:IPR020813;InterPro:IPR029063;PFAM:PF01269;InterPro:IPR000692,PARKENT|GeneID=OUR12_030012-T1|Product=hypothetical protein|Dbxref=InterPro:IPR029063;InterPro:IPR000692
GO:0000495	PARKENT|GeneID=OUR12_012757-T1|Product=centromere/microtubule-binding protein cbf5|Dbxref=InterPro:IPR004521;InterPro:IPR002501;InterPro:IPR002478;PFAM:PF08068;InterPro:IPR020103;InterPro:IPR012960;PFAM:PF01509;PFAM:PF16198;InterPro:IPR036974;InterPro:IPR032819;InterPro:IPR015947;PFAM:PF01472;InterPro:IPR004802
GO:0000502	PARKENT|GeneID=OUR12_001983-T1|Product=26S proteasome non-ATPase regulatory subunit 7 A|Dbxref=InterPro:IPR024969;InterPro:IPR037518;InterPro:IPR033858;PFAM:PF13012;InterPro:IPR000555;PFAM:PF01398,PARKENT|GeneID=OUR12_003339-T1|Product=hypothetical protein|Dbxref=PFAM:PF01399;PFAM:PF08375;InterPro:IPR000717;PFAM:PF25573;InterPro:IPR036390;InterPro:IPR013586;InterPro:IPR050756,PARKENT|GeneID=OUR12…
GO:0000506	PARKENT|GeneID=OUR12_000140-T1|Product=hypothetical protein|Dbxref=PFAM:PF06432;InterPro:IPR009450,PARKENT|GeneID=OUR12_008546-T1|Product=hypothetical protein|Dbxref=InterPro:IPR001296;InterPro:IPR039507;PFAM:PF13524;PFAM:PF08288;PFAM:PF13579;PFAM:PF13692;InterPro:IPR013234;PFAM:PF13439;PFAM:PF00534,PARKENT|GeneID=OUR12_026651-T1|Product=hypothetical protein|Dbxref=InterPro:IPR044215;InterPro:IPR…
GO:0000701	PARKENT|GeneID=OUR12_010793-T1|Product=hypothetical protein|Dbxref=InterPro:IPR029119;InterPro:IPR044298;InterPro:IPR015797;InterPro:IPR023170;PFAM:PF14815;InterPro:IPR003265;InterPro:IPR011257;PFAM:PF00730
GO:0000703	PARKENT|GeneID=OUR12_007546-T1|Product=alpha,alpha-trehalase nth1|Dbxref=InterPro:IPR004035;InterPro:IPR003651;InterPro:IPR023170;InterPro:IPR003265;PFAM:PF10576;InterPro:IPR011257;PFAM:PF00730
GO:0000706	PARKENT|GeneID=OUR12_001855-T1|Product=hypothetical protein|Dbxref=InterPro:IPR002815;InterPro:IPR034136;InterPro:IPR036078,PARKENT|GeneID=OUR12_012713-T1|Product=DNA topoisomerase 6 subunit A|Dbxref=InterPro:IPR002815;InterPro:IPR013049;PFAM:PF04406;PFAM:PF21180;InterPro:IPR034136;InterPro:IPR036078;InterPro:IPR004085;PFAM:PF20768;InterPro:IPR036388,PARKENT|GeneID=OUR12_029744-T1|Product=hypothe…
GO:0000707	PARKENT|GeneID=OUR12_023492-T1|Product=DNA repair protein rad51c|Dbxref=PFAM:PF06745;InterPro:IPR052093;InterPro:IPR027417;PFAM:PF03796;InterPro:IPR020588;InterPro:IPR013632
GO:0000709	PARKENT|GeneID=OUR12_000353-T1|Product=Homologous-pairing protein 2|Dbxref=InterPro:IPR010776;InterPro:IPR040661;PFAM:PF07106;PFAM:PF18517;InterPro:IPR036388
GO:0000712	PARKENT|GeneID=OUR12_002582-T1|Product=DNA repair endonuclease uvh1|Dbxref=InterPro:IPR047520;PFAM:PF02732;InterPro:IPR010994;InterPro:IPR011335;InterPro:IPR006166,PARKENT|GeneID=OUR12_018743-T1|Product=hypothetical protein|Dbxref=InterPro:IPR001154;InterPro:IPR013760;InterPro:IPR002205;InterPro:IPR050634;InterPro:IPR013758,PARKENT|GeneID=OUR12_018744-T1|Product=hypothetical protein|Dbxref=InterP…
GO:0000719	PARKENT|GeneID=OUR12_002376-T1|Product=DNA photolyase phr1|Dbxref=PFAM:PF00875;InterPro:IPR032673;InterPro:IPR052219;InterPro:IPR006050;InterPro:IPR036134;InterPro:IPR014729;InterPro:IPR008148;InterPro:IPR036155,PARKENT|GeneID=OUR12_004585-T1|Product=Myosin-3|Dbxref=PFAM:PF00875;InterPro:IPR005101;InterPro:IPR006050;InterPro:IPR036134;InterPro:IPR014133;InterPro:IPR002081;InterPro:IPR014729;PFAM:…
GO:0000722	PARKENT|GeneID=OUR12_007201-T1|Product=DNA repair protein rad50|Dbxref=InterPro:IPR027417;PFAM:PF13476;InterPro:IPR038729,PARKENT|GeneID=OUR12_007202-T1|Product=DNA repair protein rad50|Dbxref=,PARKENT|GeneID=OUR12_007203-T1|Product=DNA repair protein rad50|Dbxref=InterPro:IPR027417;PFAM:PF13304;PFAM:PF04423;PFAM:PF13558;InterPro:IPR013134;InterPro:IPR003959,PARKENT|GeneID=OUR12_017668-T1|Product…
GO:0000723	PARKENT|GeneID=OUR12_003374-T1|Product=hypothetical protein|Dbxref=PFAM:PF02259;PFAM:PF08064;InterPro:IPR016024;InterPro:IPR012993;InterPro:IPR000403;InterPro:IPR003151;InterPro:IPR036940;PFAM:PF23593;InterPro:IPR050517;PFAM:PF00454;InterPro:IPR011009;InterPro:IPR018936;PFAM:PF25030;InterPro:IPR014009,PARKENT|GeneID=OUR12_007395-T1|Product=ATP-dependent DNA helicase II subunit 1|Dbxref=InterPro:I…
GO:0000724	PARKENT|GeneID=OUR12_001745-T1|Product=hypothetical protein|Dbxref=InterPro:IPR027417,PARKENT|GeneID=OUR12_002582-T1|Product=DNA repair endonuclease uvh1|Dbxref=InterPro:IPR047520;PFAM:PF02732;InterPro:IPR010994;InterPro:IPR011335;InterPro:IPR006166,PARKENT|GeneID=OUR12_002934-T1|Product=DNA helicase mcm9|Dbxref=InterPro:IPR027417;InterPro:IPR001208;InterPro:IPR031327,PARKENT|GeneID=OUR12_002935-…
GO:0000725	PARKENT|GeneID=OUR12_002902-T1|Product=hypothetical protein|Dbxref=PFAM:PF15072;InterPro:IPR028045,PARKENT|GeneID=OUR12_014059-T1|Product=hypothetical protein|Dbxref=InterPro:IPR027417;InterPro:IPR020588;InterPro:IPR003593;PFAM:PF13481,PARKENT|GeneID=OUR12_014060-T1|Product=hypothetical protein|Dbxref=InterPro:IPR014721;InterPro:IPR020568,PARKENT|GeneID=OUR12_014977-T1|Product=hypothetical protei…
GO:0000727	PARKENT|GeneID=OUR12_001787-T1|Product=hypothetical protein|Dbxref=InterPro:IPR018525;InterPro:IPR012340;InterPro:IPR027417;InterPro:IPR027925;PFAM:PF00493;PFAM:PF17207;PFAM:PF07728;InterPro:IPR001208;InterPro:IPR041562;PFAM:PF17855;PFAM:PF12619;PFAM:PF23669;InterPro:IPR033762;InterPro:IPR008045;InterPro:IPR031327;PFAM:PF14551,PARKENT|GeneID=OUR12_003146-T1|Product=DNA replication licensing facto…
GO:0000730	PARKENT|GeneID=OUR12_006722-T1|Product=Meiotic recombination protein dmc1|Dbxref=InterPro:IPR020587;InterPro:IPR027417;InterPro:IPR010995;InterPro:IPR020588;InterPro:IPR013632,PARKENT|GeneID=OUR12_016503-T1|Product=recombinase rad51|Dbxref=PFAM:PF14520;InterPro:IPR011941;InterPro:IPR020587;InterPro:IPR027417;PFAM:PF00154;InterPro:IPR010995;InterPro:IPR016467;PFAM:PF08423;InterPro:IPR020588;PFAM:P…
GO:0000731	PARKENT|GeneID=OUR12_004297-T1|Product=hypothetical protein|Dbxref=PFAM:PF00004;InterPro:IPR027417;InterPro:IPR009060;PFAM:PF05496;PFAM:PF16193;InterPro:IPR021886;InterPro:IPR032423;PFAM:PF22562;PFAM:PF12002;PFAM:PF00627;InterPro:IPR003959;PFAM:PF07728;PFAM:PF00158;InterPro:IPR015940;InterPro:IPR008921;InterPro:IPR051314;InterPro:IPR003593,PARKENT|GeneID=OUR12_024098-T1|Product=hypothetical prote…
GO:0000738	PARKENT|GeneID=OUR12_020985-T1|Product=hypothetical protein|Dbxref=PFAM:PF00929;InterPro:IPR013520;InterPro:IPR036397;InterPro:IPR040393;InterPro:IPR012337;PFAM:PF13482
GO:0000774	PARKENT|GeneID=OUR12_006068-T1|Product=hypothetical protein|Dbxref=InterPro:IPR036533;PFAM:PF02179;InterPro:IPR039773;InterPro:IPR003103,PARKENT|GeneID=OUR12_008619-T1|Product=hypothetical protein|Dbxref=InterPro:IPR036533;InterPro:IPR003103;PFAM:PF00240;PFAM:PF02179;InterPro:IPR029071;InterPro:IPR000626;InterPro:IPR039773,PARKENT|GeneID=OUR12_011919-T1|Product=hypothetical protein|Dbxref=InterPr…
GO:0000775	PARKENT|GeneID=OUR12_009159-T1|Product=hypothetical protein|Dbxref=InterPro:IPR011515;PFAM:PF07557;InterPro:IPR044693,PARKENT|GeneID=OUR12_018268-T1|Product=hypothetical protein|Dbxref=PFAM:PF22766;PFAM:PF06248;InterPro:IPR048343;PFAM:PF20666;InterPro:IPR046362;InterPro:IPR009361;InterPro:IPR048344,PARKENT|GeneID=OUR12_019863-T1|Product=hypothetical protein|Dbxref=InterPro:IPR011515;PFAM:PF07557;…
GO:0000776	PARKENT|GeneID=OUR12_001217-T1|Product=hypothetical protein|Dbxref=InterPro:IPR019775;InterPro:IPR036322;InterPro:IPR015943;InterPro:IPR001680,PARKENT|GeneID=OUR12_001219-T1|Product=hypothetical protein|Dbxref=InterPro:IPR036322;InterPro:IPR015943,PARKENT|GeneID=OUR12_001500-T1|Product=Mitotic spindle checkpoint component mad2|Dbxref=PFAM:PF02301;InterPro:IPR036570;InterPro:IPR045091;InterPro:IPR…
GO:0000779	PARKENT|GeneID=OUR12_006369-T1|Product=Condensin-2 complex subunit CAP-D3|Dbxref=InterPro:IPR011989;InterPro:IPR032682;InterPro:IPR016024;InterPro:IPR026971;PFAM:PF12717,PARKENT|GeneID=OUR12_013347-T1|Product=Condensin-1 complex subunit CAP-D2|Dbxref=InterPro:IPR007673;InterPro:IPR032682;InterPro:IPR011989;InterPro:IPR016024;InterPro:IPR026971;PFAM:PF12922;InterPro:IPR024324;PFAM:PF12717,PARKENT|…
GO:0000781	PARKENT|GeneID=OUR12_004573-T1|Product=hypothetical protein|Dbxref=InterPro:IPR004365;InterPro:IPR012340;InterPro:IPR040260;InterPro:IPR036390;PFAM:PF08784;PFAM:PF01336;InterPro:IPR014646;InterPro:IPR014892;InterPro:IPR036388,PARKENT|GeneID=OUR12_017656-T1|Product=hypothetical protein|Dbxref=InterPro:IPR004365;InterPro:IPR012340;InterPro:IPR040260;InterPro:IPR036390;PFAM:PF08784;PFAM:PF01336;Inte…
GO:0000783	PARKENT|GeneID=OUR12_025494-T1|Product=hypothetical protein|Dbxref=InterPro:IPR028389;PFAM:PF25507;InterPro:IPR011564;InterPro:IPR012340
GO:0000785	PARKENT|GeneID=OUR12_000161-T1|Product=hypothetical protein|Dbxref=InterPro:IPR001650;InterPro:IPR000330;PFAM:PF11496;PFAM:PF04851;PFAM:PF06465;InterPro:IPR011011;PFAM:PF00271;PFAM:PF00385;InterPro:IPR014001;InterPro:IPR027417;InterPro:IPR013083;InterPro:IPR019786;PFAM:PF00176;InterPro:IPR023780;InterPro:IPR009057;InterPro:IPR038718;InterPro:IPR016197;InterPro:IPR049730;InterPro:IPR001965;PFAM:PF…
GO:0000786	PARKENT|GeneID=OUR12_000545-T1|Product=hypothetical protein|Dbxref=PFAM:PF00538;InterPro:IPR036390;InterPro:IPR017956;InterPro:IPR005818;InterPro:IPR036388,PARKENT|GeneID=OUR12_000585-T1|Product=hypothetical protein|Dbxref=PFAM:PF00538;InterPro:IPR036390;InterPro:IPR000116;InterPro:IPR017956;InterPro:IPR005818;InterPro:IPR036388,PARKENT|GeneID=OUR12_003914-T1|Product=hypothetical protein|Dbxref=I…
GO:0000790	PARKENT|GeneID=OUR12_000482-T1|Product=ASF1 anti-silencing function 1|Dbxref=InterPro:IPR036747;InterPro:IPR006818;PFAM:PF04729,PARKENT|GeneID=OUR12_001863-T1|Product=hypothetical protein|Dbxref=PFAM:PF02891;InterPro:IPR013083;InterPro:IPR004181,PARKENT|GeneID=OUR12_004274-T1|Product=hypothetical protein|Dbxref=InterPro:IPR036322;PFAM:PF16367;InterPro:IPR035979;InterPro:IPR012677;InterPro:IPR0005…
GO:0000793	PARKENT|GeneID=OUR12_000883-T1|Product=hypothetical protein|Dbxref=InterPro:IPR034566,PARKENT|GeneID=OUR12_010477-T1|Product=hypothetical protein|Dbxref=InterPro:IPR011989;InterPro:IPR016024;InterPro:IPR027165;InterPro:IPR025977,PARKENT|GeneID=OUR12_014199-T1|Product=filament-like protein|Dbxref=,PARKENT|GeneID=OUR12_017871-T1|Product=hypothetical protein|Dbxref=PFAM:PF14631;InterPro:IPR029448,PA…
GO:0000794	PARKENT|GeneID=OUR12_000353-T1|Product=Homologous-pairing protein 2|Dbxref=InterPro:IPR010776;InterPro:IPR040661;PFAM:PF07106;PFAM:PF18517;InterPro:IPR036388,PARKENT|GeneID=OUR12_006722-T1|Product=Meiotic recombination protein dmc1|Dbxref=InterPro:IPR020587;InterPro:IPR027417;InterPro:IPR010995;InterPro:IPR020588;InterPro:IPR013632,PARKENT|GeneID=OUR12_007201-T1|Product=DNA repair protein rad50|D…
GO:0000796	PARKENT|GeneID=OUR12_006117-T1|Product=hypothetical protein|Dbxref=PFAM:PF16869;InterPro:IPR031739;PFAM:PF06278;InterPro:IPR023093;InterPro:IPR031719;InterPro:IPR031737;InterPro:IPR009378;PFAM:PF16858,PARKENT|GeneID=OUR12_010477-T1|Product=hypothetical protein|Dbxref=InterPro:IPR011989;InterPro:IPR016024;InterPro:IPR027165;InterPro:IPR025977,PARKENT|GeneID=OUR12_011320-T1|Product=hypothetical pro…
GO:0000799	PARKENT|GeneID=OUR12_006369-T1|Product=Condensin-2 complex subunit CAP-D3|Dbxref=InterPro:IPR011989;InterPro:IPR032682;InterPro:IPR016024;InterPro:IPR026971;PFAM:PF12717,PARKENT|GeneID=OUR12_013347-T1|Product=Condensin-1 complex subunit CAP-D2|Dbxref=InterPro:IPR007673;InterPro:IPR032682;InterPro:IPR011989;InterPro:IPR016024;InterPro:IPR026971;PFAM:PF12922;InterPro:IPR024324;PFAM:PF12717,PARKENT|…
GO:0000808	PARKENT|GeneID=OUR12_000472-T1|Product=origin recognition complex subunit 4|Dbxref=InterPro:IPR032705;PFAM:PF00004;PFAM:PF13401;InterPro:IPR027417;InterPro:IPR016527;InterPro:IPR003959;InterPro:IPR003593,PARKENT|GeneID=OUR12_025447-T1|Product=Origin recognition complex subunit 5|Dbxref=InterPro:IPR048866;InterPro:IPR041664;PFAM:PF21639;PFAM:PF13191;InterPro:IPR027417;InterPro:IPR020796;InterPro:I…
GO:0000811	PARKENT|GeneID=OUR12_014330-T1|Product=hypothetical protein|Dbxref=InterPro:IPR021151;PFAM:PF05916;InterPro:IPR005339;PFAM:PF24997;InterPro:IPR036224,PARKENT|GeneID=OUR12_019213-T1|Product=hypothetical protein|Dbxref=InterPro:IPR038437;InterPro:IPR009741;PFAM:PF07011;InterPro:IPR021151;InterPro:IPR010492;PFAM:PF05916;PFAM:PF22466;InterPro:IPR036224,PARKENT|GeneID=OUR12_024176-T1|Product=DNA repli…
GO:0000812	PARKENT|GeneID=OUR12_008156-T1|Product=Ras and Rab interactor 1|Dbxref=InterPro:IPR027417;InterPro:IPR027238;PFAM:PF06068;InterPro:IPR041048;InterPro:IPR010339;InterPro:IPR042487;InterPro:IPR003593;PFAM:PF17856,PARKENT|GeneID=OUR12_009985-T1|Product=swr complex subunit|Dbxref=InterPro:IPR008468;PFAM:PF16282;InterPro:IPR032563;PFAM:PF00249;InterPro:IPR001005;InterPro:IPR027109;InterPro:IPR009057,P…
GO:0000813	PARKENT|GeneID=OUR12_005757-T1|Product=hypothetical protein|Dbxref=InterPro:IPR013083;InterPro:IPR000306;InterPro:IPR017455;InterPro:IPR045893;PFAM:PF01363;InterPro:IPR011011,PARKENT|GeneID=OUR12_007270-T1|Product=hypothetical protein|Dbxref=InterPro:IPR008883;InterPro:IPR052070;InterPro:IPR037202;PFAM:PF05743;PFAM:PF09454;InterPro:IPR017916;InterPro:IPR016135,PARKENT|GeneID=OUR12_009478-T1|Produ…
GO:0000814	PARKENT|GeneID=OUR12_002847-T1|Product=Vacuolar protein-sorting-associated protein 25|Dbxref=InterPro:IPR008570;InterPro:IPR014041;InterPro:IPR036390;InterPro:IPR036388,PARKENT|GeneID=OUR12_029554-T1|Product=hypothetical protein|Dbxref=PFAM:PF04157;InterPro:IPR040608;InterPro:IPR036390;InterPro:IPR016689;InterPro:IPR036388,PARKENT|GeneID=OUR12_030447-T1|Product=hypothetical protein|Dbxref=InterPr…
GO:0000815	PARKENT|GeneID=OUR12_004355-T1|Product=hypothetical protein|Dbxref=InterPro:IPR005024;PFAM:PF03357,PARKENT|GeneID=OUR12_009152-T1|Product=hypothetical protein|Dbxref=InterPro:IPR005024;PFAM:PF03357,PARKENT|GeneID=OUR12_010057-T1|Product=hypothetical protein|Dbxref=PFAM:PF25880;InterPro:IPR005024;PFAM:PF03357,PARKENT|GeneID=OUR12_010180-T1|Product=hypothetical protein|Dbxref=InterPro:IPR005024;PFA…
GO:0000818	PARKENT|GeneID=OUR12_003100-T1|Product=hypothetical protein|Dbxref=InterPro:IPR007128,PARKENT|GeneID=OUR12_025756-T1|Product=hypothetical protein|Dbxref=InterPro:IPR008685;PFAM:PF05859
GO:0000819	PARKENT|GeneID=OUR12_018743-T1|Product=hypothetical protein|Dbxref=InterPro:IPR001154;InterPro:IPR013760;InterPro:IPR002205;InterPro:IPR050634;InterPro:IPR013758,PARKENT|GeneID=OUR12_018744-T1|Product=hypothetical protein|Dbxref=InterPro:IPR013757;InterPro:IPR013760;InterPro:IPR050634,PARKENT|GeneID=OUR12_018745-T1|Product=hypothetical protein|Dbxref=InterPro:IPR001154;InterPro:IPR013760;InterPro…
GO:0000822	PARKENT|GeneID=OUR12_000774-T1|Product=hypothetical protein|Dbxref=PFAM:PF07817;InterPro:IPR012476;InterPro:IPR038506,PARKENT|GeneID=OUR12_001201-T1|Product=hypothetical protein|Dbxref=InterPro:IPR004331;InterPro:IPR034092;PFAM:PF03105;InterPro:IPR004342,PARKENT|GeneID=OUR12_001202-T1|Product=Phosphate transporter PHO1 3|Dbxref=InterPro:IPR004331;InterPro:IPR034092;PFAM:PF03105;InterPro:IPR004342…
GO:0000828	PARKENT|GeneID=OUR12_022614-T1|Product=inositol hexakisphosphate and diphosphoinositol-pentakisphosphate kinase|Dbxref=PFAM:PF18086;InterPro:IPR000560;InterPro:IPR029033;InterPro:IPR037446;InterPro:IPR033379;PFAM:PF00328;InterPro:IPR040557;InterPro:IPR004792;InterPro:IPR036188;PFAM:PF03486;InterPro:IPR023166;PFAM:PF22780
GO:0000829	PARKENT|GeneID=OUR12_022614-T1|Product=inositol hexakisphosphate and diphosphoinositol-pentakisphosphate kinase|Dbxref=PFAM:PF18086;InterPro:IPR000560;InterPro:IPR029033;InterPro:IPR037446;InterPro:IPR033379;PFAM:PF00328;InterPro:IPR040557;InterPro:IPR004792;InterPro:IPR036188;PFAM:PF03486;InterPro:IPR023166;PFAM:PF22780
GO:0000839	PARKENT|GeneID=OUR12_004342-T1|Product=ER-associated protein degradation protein|Dbxref=InterPro:IPR035952;InterPro:IPR007599;PFAM:PF04511,PARKENT|GeneID=OUR12_012054-T1|Product=Rhomboid-like protein 15|Dbxref=InterPro:IPR035952;PFAM:PF04511;PFAM:PF01694;InterPro:IPR022764,PARKENT|GeneID=OUR12_015110-T1|Product=Derlin-2|Dbxref=InterPro:IPR035952;InterPro:IPR007599;PFAM:PF04511,PARKENT|GeneID=OUR1…
GO:0000902	PARKENT|GeneID=OUR12_000176-T1|Product=histone chaperone|Dbxref=PFAM:PF09735;InterPro:IPR019137,PARKENT|GeneID=OUR12_000177-T1|Product=histone chaperone|Dbxref=InterPro:IPR019137,PARKENT|GeneID=OUR12_005273-T1|Product=hypothetical protein|Dbxref=InterPro:IPR008081,PARKENT|GeneID=OUR12_005274-T1|Product=hypothetical protein|Dbxref=InterPro:IPR008081,PARKENT|GeneID=OUR12_005275-T1|Product=hypotheti…
GO:0000906	PARKENT|GeneID=OUR12_007786-T1|Product=hypothetical protein|Dbxref=InterPro:IPR036467;InterPro:IPR034964;PFAM:PF00885;InterPro:IPR002180
GO:0000910	PARKENT|GeneID=OUR12_006314-T1|Product=hypothetical protein|Dbxref=PFAM:PF16796;PFAM:PF00225;InterPro:IPR044986;InterPro:IPR027417;InterPro:IPR001752;InterPro:IPR036961;InterPro:IPR019821
GO:0000911	PARKENT|GeneID=OUR12_001737-T1|Product=hypothetical protein|Dbxref=InterPro:IPR040321,PARKENT|GeneID=OUR12_006474-T1|Product=hypothetical protein|Dbxref=InterPro:IPR011989;InterPro:IPR016024;PFAM:PF24970;InterPro:IPR044591;InterPro:IPR008271;PFAM:PF23606;PFAM:PF00069;InterPro:IPR017441;InterPro:IPR000719;PFAM:PF07714;InterPro:IPR011009,PARKENT|GeneID=OUR12_009649-T1|Product=actin binding protein|…
GO:0000914	PARKENT|GeneID=OUR12_006474-T1|Product=hypothetical protein|Dbxref=InterPro:IPR011989;InterPro:IPR016024;PFAM:PF24970;InterPro:IPR044591;InterPro:IPR008271;PFAM:PF23606;PFAM:PF00069;InterPro:IPR017441;InterPro:IPR000719;PFAM:PF07714;InterPro:IPR011009
GO:0000919	PARKENT|GeneID=OUR12_019625-T1|Product=Protein nedd1|Dbxref=InterPro:IPR036322;InterPro:IPR044621;PFAM:PF00400;InterPro:IPR001680;InterPro:IPR015943,PARKENT|GeneID=OUR12_026899-T1|Product=hypothetical protein|Dbxref=InterPro:IPR036322;InterPro:IPR044621;PFAM:PF00400;InterPro:IPR001680;InterPro:IPR015943
GO:0000922	PARKENT|GeneID=OUR12_009830-T1|Product=Gamma-tubulin complex component 4|Dbxref=InterPro:IPR042241;InterPro:IPR007259;PFAM:PF04130;PFAM:PF17681;InterPro:IPR040457;InterPro:IPR041470,PARKENT|GeneID=OUR12_011731-T1|Product=hypothetical protein|Dbxref=InterPro:IPR041470;PFAM:PF17681;InterPro:IPR007259,PARKENT|GeneID=OUR12_011732-T1|Product=hypothetical protein|Dbxref=InterPro:IPR040457;PFAM:PF04130;…
GO:0000923	PARKENT|GeneID=OUR12_009830-T1|Product=Gamma-tubulin complex component 4|Dbxref=InterPro:IPR042241;InterPro:IPR007259;PFAM:PF04130;PFAM:PF17681;InterPro:IPR040457;InterPro:IPR041470,PARKENT|GeneID=OUR12_011731-T1|Product=hypothetical protein|Dbxref=InterPro:IPR041470;PFAM:PF17681;InterPro:IPR007259,PARKENT|GeneID=OUR12_011732-T1|Product=hypothetical protein|Dbxref=InterPro:IPR040457;PFAM:PF04130;…
GO:0000930	PARKENT|GeneID=OUR12_009830-T1|Product=Gamma-tubulin complex component 4|Dbxref=InterPro:IPR042241;InterPro:IPR007259;PFAM:PF04130;PFAM:PF17681;InterPro:IPR040457;InterPro:IPR041470,PARKENT|GeneID=OUR12_011731-T1|Product=hypothetical protein|Dbxref=InterPro:IPR041470;PFAM:PF17681;InterPro:IPR007259,PARKENT|GeneID=OUR12_011732-T1|Product=hypothetical protein|Dbxref=InterPro:IPR040457;PFAM:PF04130;…
GO:0000931	PARKENT|GeneID=OUR12_012487-T1|Product=hypothetical protein|Dbxref=InterPro:IPR022214;PFAM:PF12554,PARKENT|GeneID=OUR12_016157-T1|Product=hypothetical protein|Dbxref=InterPro:IPR022214;PFAM:PF12554
GO:0000932	PARKENT|GeneID=OUR12_000299-T1|Product=hypothetical protein|Dbxref=PFAM:PF12701;InterPro:IPR025761;PFAM:PF09532;InterPro:IPR010920;InterPro:IPR025762;InterPro:IPR019050;InterPro:IPR025609;PFAM:PF14438;InterPro:IPR047575;InterPro:IPR025768,PARKENT|GeneID=OUR12_002226-T1|Product=Envelope glycoprotein gp160|Dbxref=InterPro:IPR001650;InterPro:IPR027417;PFAM:PF00271,PARKENT|GeneID=OUR12_002227-T1|Prod…
GO:0000938	PARKENT|GeneID=OUR12_000178-T1|Product=Vacuolar protein sorting-associated protein 52|Dbxref=PFAM:PF00957;InterPro:IPR046357;PFAM:PF13774;PFAM:PF00254;InterPro:IPR001388;InterPro:IPR042855;PFAM:PF20655;InterPro:IPR048361;InterPro:IPR010908;InterPro:IPR007258;InterPro:IPR011012;InterPro:IPR001179;InterPro:IPR048319,PARKENT|GeneID=OUR12_009932-T1|Product=Vacuolar protein sorting-associated protein …
GO:0000940	PARKENT|GeneID=OUR12_005035-T1|Product=hypothetical protein|Dbxref=PFAM:PF16740;InterPro:IPR026762;InterPro:IPR042091,PARKENT|GeneID=OUR12_012063-T1|Product=hypothetical protein|Dbxref=InterPro:IPR033341,PARKENT|GeneID=OUR12_023520-T1|Product=hypothetical protein|Dbxref=InterPro:IPR009829;InterPro:IPR042031;PFAM:PF07160
GO:0000949	PARKENT|GeneID=OUR12_008608-T1|Product=hypothetical protein|Dbxref=PFAM:PF02775;InterPro:IPR011766;InterPro:IPR047214;PFAM:PF02776;InterPro:IPR012110;InterPro:IPR029035;InterPro:IPR012001;InterPro:IPR012000;PFAM:PF00205;InterPro:IPR029061;InterPro:IPR047213,PARKENT|GeneID=OUR12_010907-T1|Product=Pyruvate decarboxylase 3|Dbxref=InterPro:IPR029061;InterPro:IPR012110,PARKENT|GeneID=OUR12_012215-T1|P…
GO:0000956	PARKENT|GeneID=OUR12_002610-T1|Product=NAD-capped RNA hydrolase dxo1|Dbxref=InterPro:IPR013961;InterPro:IPR039039;PFAM:PF08652,PARKENT|GeneID=OUR12_009797-T1|Product=hypothetical protein|Dbxref=PFAM:PF01423;InterPro:IPR014790;InterPro:IPR014721;InterPro:IPR042120;InterPro:IPR042121;PFAM:PF01119;InterPro:IPR010920;InterPro:IPR034101;InterPro:IPR020568;InterPro:IPR013507;InterPro:IPR037198;InterPro…
GO:0000958	PARKENT|GeneID=OUR12_011973-T1|Product=Purine nucleoside phosphorylase|Dbxref=InterPro:IPR004087;InterPro:IPR012340;InterPro:IPR012162;InterPro:IPR036612;PFAM:PF00013;InterPro:IPR004088;InterPro:IPR003029;PFAM:PF00575,PARKENT|GeneID=OUR12_011974-T1|Product=Purine nucleoside phosphorylase|Dbxref=InterPro:IPR001247;InterPro:IPR012162;InterPro:IPR015847;InterPro:IPR020568;InterPro:IPR036345;InterPro…
GO:0000963	PARKENT|GeneID=OUR12_007788-T1|Product=hypothetical protein|Dbxref=InterPro:IPR013584;PFAM:PF08373;InterPro:IPR050870
GO:0000965	PARKENT|GeneID=OUR12_006677-T1|Product=hypothetical protein|Dbxref=InterPro:IPR027417;PFAM:PF22527;InterPro:IPR050699,PARKENT|GeneID=OUR12_006678-T1|Product=RNA helicase|Dbxref=InterPro:IPR027417;InterPro:IPR001650;InterPro:IPR050699;InterPro:IPR041082;PFAM:PF18147;InterPro:IPR022192;PFAM:PF00271;PFAM:PF12513,PARKENT|GeneID=OUR12_011973-T1|Product=Purine nucleoside phosphorylase|Dbxref=InterPro:I…
GO:0000967	PARKENT|GeneID=OUR12_002190-T1|Product=hypothetical protein|Dbxref=InterPro:IPR000484;InterPro:IPR036854;InterPro:IPR037027;InterPro:IPR006641;PFAM:PF00124;InterPro:IPR005227;PFAM:PF03652;InterPro:IPR012337,PARKENT|GeneID=OUR12_023455-T1|Product=hypothetical protein|Dbxref=InterPro:IPR037027;InterPro:IPR006641;InterPro:IPR005227;PFAM:PF03652;InterPro:IPR012337
GO:0000972	PARKENT|GeneID=OUR12_000627-T1|Product=hypothetical protein|Dbxref=InterPro:IPR007187;InterPro:IPR014908;InterPro:IPR042538;InterPro:IPR004870;PFAM:PF03177;InterPro:IPR042533;PFAM:PF08801;InterPro:IPR042537,PARKENT|GeneID=OUR12_014551-T1|Product=Poly(A)+ RNA export protein rae1|Dbxref=InterPro:IPR036322;InterPro:IPR020472;PFAM:PF00400;InterPro:IPR001680;InterPro:IPR015943,PARKENT|GeneID=OUR12_018…
GO:0000973	PARKENT|GeneID=OUR12_002149-T1|Product=hypothetical protein|Dbxref=InterPro:IPR037665;InterPro:IPR036903;InterPro:IPR007230;PFAM:PF04096,PARKENT|GeneID=OUR12_013812-T1|Product=hypothetical protein|Dbxref=InterPro:IPR007252,PARKENT|GeneID=OUR12_014537-T1|Product=Nuclear pore complex protein nup96|Dbxref=InterPro:IPR036903;PFAM:PF04096;InterPro:IPR007230;InterPro:IPR021967;InterPro:IPR037665;PFAM:P…
GO:0000974	PARKENT|GeneID=OUR12_001940-T1|Product=Crooked neck-like protein 1|Dbxref=PFAM:PF23233;InterPro:IPR003107;PFAM:PF02184;InterPro:IPR045075;PFAM:PF13428;InterPro:IPR011990;PFAM:PF23240;PFAM:PF23241,PARKENT|GeneID=OUR12_001941-T1|Product=Crooked neck-like protein 1|Dbxref=InterPro:IPR003107;PFAM:PF02184;InterPro:IPR045075;InterPro:IPR011990,PARKENT|GeneID=OUR12_003332-T1|Product=hypothetical protein…
GO:0000976	PARKENT|GeneID=OUR12_000097-T1|Product=hypothetical protein|Dbxref=InterPro:IPR002110;InterPro:IPR036770;PFAM:PF00023;PFAM:PF12796;InterPro:IPR050663;PFAM:PF13857;PFAM:PF13606;PFAM:PF13637,PARKENT|GeneID=OUR12_000316-T1|Product=hypothetical protein|Dbxref=InterPro:IPR003441;InterPro:IPR036093;PFAM:PF02365;InterPro:IPR044799,PARKENT|GeneID=OUR12_000317-T1|Product=hypothetical protein|Dbxref=InterP…
GO:0000977	PARKENT|GeneID=OUR12_000016-T1|Product=Agamous-like MADS-box protein mads2|Dbxref=PFAM:PF00319;PFAM:PF01486;InterPro:IPR002487;InterPro:IPR002100;InterPro:IPR033896;InterPro:IPR036879;InterPro:IPR050142,PARKENT|GeneID=OUR12_000166-T1|Product=hypothetical protein|Dbxref=PFAM:PF00319;PFAM:PF01486;InterPro:IPR002100;InterPro:IPR002487;InterPro:IPR033896;InterPro:IPR027059;PFAM:PF00928;InterPro:IPR03…
GO:0000978	PARKENT|GeneID=OUR12_000014-T1|Product=Agamous-like MADS-box protein ap1|Dbxref=PFAM:PF01486;InterPro:IPR050142;InterPro:IPR002487,PARKENT|GeneID=OUR12_000016-T1|Product=Agamous-like MADS-box protein mads2|Dbxref=PFAM:PF00319;PFAM:PF01486;InterPro:IPR002487;InterPro:IPR002100;InterPro:IPR033896;InterPro:IPR036879;InterPro:IPR050142,PARKENT|GeneID=OUR12_000652-T1|Product=hypothetical protein|Dbxre…
GO:0000981	PARKENT|GeneID=OUR12_000014-T1|Product=Agamous-like MADS-box protein ap1|Dbxref=PFAM:PF01486;InterPro:IPR050142;InterPro:IPR002487,PARKENT|GeneID=OUR12_000016-T1|Product=Agamous-like MADS-box protein mads2|Dbxref=PFAM:PF00319;PFAM:PF01486;InterPro:IPR0024
GO:0000987	PARKENT|GeneID=OUR12_002916-T1|Product=hypothetical protein|Dbxref=PFAM:PF00319;InterPro:IPR002100;InterPro:IPR033897;InterPro:IPR036879;InterPro:IPR050142,PARKENT|GeneID=OUR12_002917-T1|Product=hypothetical protein|Dbxref=PFAM:PF00319;InterPro:IPR036879;InterPro:IPR033897;InterPro:IPR002100,PARKENT|GeneID=OUR12_002918-T1|Product=hypothetical protein|Dbxref=PFAM:PF00319;InterPro:IPR036879;InterPr…
GO:0000993	PARKENT|GeneID=OUR12_006667-T1|Product=accessory factor associated with RNA polymerase II|Dbxref=InterPro:IPR038103;InterPro:IPR032041;InterPro:IPR031336;PFAM:PF05179;InterPro:IPR007852,PARKENT|GeneID=OUR12_011538-T1|Product=hypothetical protein|Dbxref=PFAM:PF04818;InterPro:IPR006569;InterPro:IPR008942,PARKENT|GeneID=OUR12_011912-T1|Product=hypothetical protein|Dbxref=,PARKENT|GeneID=OUR12_011913…
GO:0000994	PARKENT|GeneID=OUR12_000496-T1|Product=hypothetical protein|Dbxref=InterPro:IPR015257;InterPro:IPR038564;PFAM:PF09174
GO:0000995	PARKENT|GeneID=OUR12_011956-T1|Product=hypothetical protein|Dbxref=PFAM:PF07741;InterPro:IPR036915;PFAM:PF00382;InterPro:IPR013150;InterPro:IPR011665;InterPro:IPR000812
GO:0001002	PARKENT|GeneID=OUR12_007776-T1|Product=hypothetical protein|Dbxref=InterPro:IPR040454;PFAM:PF09734;InterPro:IPR019136
GO:0001003	PARKENT|GeneID=OUR12_007776-T1|Product=hypothetical protein|Dbxref=InterPro:IPR040454;PFAM:PF09734;InterPro:IPR019136
GO:0001006	PARKENT|GeneID=OUR12_011956-T1|Product=hypothetical protein|Dbxref=PFAM:PF07741;InterPro:IPR036915;PFAM:PF00382;InterPro:IPR013150;InterPro:IPR011665;InterPro:IPR000812,PARKENT|GeneID=OUR12_025550-T1|Product=hypothetical protein|Dbxref=InterPro:IPR051575,PARKENT|GeneID=OUR12_025551-T1|Product=hypothetical protein|Dbxref=InterPro:IPR017930;InterPro:IPR051575;PFAM:PF13921;PFAM:PF00249;InterPro:IPR0…
GO:0001042	PARKENT|GeneID=OUR12_006041-T1|Product=hypothetical protein|Dbxref=InterPro:IPR007991;PFAM:PF05327,PARKENT|GeneID=OUR12_006052-T1|Product=hypothetical protein|Dbxref=InterPro:IPR007991
GO:0001046	PARKENT|GeneID=OUR12_008939-T1|Product=hypothetical protein|Dbxref=InterPro:IPR009072;InterPro:IPR050568,PARKENT|GeneID=OUR12_020273-T1|Product=hypothetical protein|Dbxref=PFAM:PF00808;InterPro:IPR009072;InterPro:IPR050568;InterPro:IPR003958
GO:0001054	PARKENT|GeneID=OUR12_007661-T1|Product=DNA-directed RNA polymerases II and V subunit 8A|Dbxref=InterPro:IPR012340;InterPro:IPR005570;PFAM:PF03870,PARKENT|GeneID=OUR12_007662-T1|Product=hypothetical protein|Dbxref=InterPro:IPR012340;InterPro:IPR005570;PFAM:PF03870,PARKENT|GeneID=OUR12_008494-T1|Product=hypothetical protein|Dbxref=InterPro:IPR009025;PFAM:PF01193;InterPro:IPR008193;InterPro:IPR02290…
GO:0001055	PARKENT|GeneID=OUR12_001585-T1|Product=hypothetical protein|Dbxref=InterPro:IPR045867,PARKENT|GeneID=OUR12_002296-T1|Product=hypothetical protein|Dbxref=InterPro:IPR007083;InterPro:IPR038120;InterPro:IPR000722;InterPro:IPR045867;InterPro:IPR040403;InterPro:IPR040402;PFAM:PF00623;InterPro:IPR007066;InterPro:IPR006592;PFAM:PF11523;InterPro:IPR042102;PFAM:PF04983,PARKENT|GeneID=OUR12_003785-T1|Produ…
GO:0001056	PARKENT|GeneID=OUR12_007661-T1|Product=DNA-directed RNA polymerases II and V subunit 8A|Dbxref=InterPro:IPR012340;InterPro:IPR005570;PFAM:PF03870,PARKENT|GeneID=OUR12_007662-T1|Product=hypothetical protein|Dbxref=InterPro:IPR012340;InterPro:IPR005570;PFAM:PF03870,PARKENT|GeneID=OUR12_008494-T1|Product=hypothetical protein|Dbxref=InterPro:IPR009025;PFAM:PF01193;InterPro:IPR008193;InterPro:IPR02290…
GO:0001096	PARKENT|GeneID=OUR12_015177-T1|Product=Transcription initiation factor IIF subunit alpha|Dbxref=InterPro:IPR011039;InterPro:IPR008851;InterPro:IPR036390;PFAM:PF05793;InterPro:IPR036388
GO:0001097	PARKENT|GeneID=OUR12_002231-T1|Product=hypothetical protein|Dbxref=InterPro:IPR011008;PFAM:PF18121;InterPro:IPR003166;InterPro:IPR013097;InterPro:IPR016656;PFAM:PF07876;InterPro:IPR040501,PARKENT|GeneID=OUR12_005445-T1|Product=hypothetical protein|Dbxref=InterPro:IPR016656;InterPro:IPR003166
GO:0001113	PARKENT|GeneID=OUR12_000001-T1|Product=hypothetical protein|Dbxref=InterPro:IPR039997;InterPro:IPR013083,PARKENT|GeneID=OUR12_017749-T1|Product=hypothetical protein|Dbxref=InterPro:IPR039997,PARKENT|GeneID=OUR12_017750-T1|Product=hypothetical protein|Dbxref=InterPro:IPR002853;InterPro:IPR039997;InterPro:IPR013083
GO:0001156	PARKENT|GeneID=OUR12_003514-T1|Product=hypothetical protein|Dbxref=PFAM:PF15963;InterPro:IPR039467;PFAM:PF00249;InterPro:IPR001005;InterPro:IPR009057
GO:0001164	PARKENT|GeneID=OUR12_001154-T1|Product=hypothetical protein|Dbxref=InterPro:IPR021752;InterPro:IPR033599;PFAM:PF11781,PARKENT|GeneID=OUR12_028606-T1|Product=hypothetical protein|Dbxref=InterPro:IPR049087;PFAM:PF20641;InterPro:IPR038801
GO:0001181	PARKENT|GeneID=OUR12_006041-T1|Product=hypothetical protein|Dbxref=InterPro:IPR007991;PFAM:PF05327,PARKENT|GeneID=OUR12_006052-T1|Product=hypothetical protein|Dbxref=InterPro:IPR007991
GO:0001188	PARKENT|GeneID=OUR12_001154-T1|Product=hypothetical protein|Dbxref=InterPro:IPR021752;InterPro:IPR033599;PFAM:PF11781,PARKENT|GeneID=OUR12_013923-T1|Product=hypothetical protein|Dbxref=InterPro:IPR009668;PFAM:PF06870
GO:0001193	PARKENT|GeneID=OUR12_006188-T1|Product=DNA-directed RNA polymerases II, IV and V subunit 9A|Dbxref=InterPro:IPR034012;InterPro:IPR001529;PFAM:PF02150;InterPro:IPR019761;InterPro:IPR012164;InterPro:IPR001222;PFAM:PF01096
GO:0001228	PARKENT|GeneID=OUR12_001431-T1|Product=hypothetical protein|Dbxref=InterPro:IPR009072;InterPro:IPR027113;PFAM:PF00125;PFAM:PF00808;InterPro:IPR003958,PARKENT|GeneID=OUR12_001436-T1|Product=hypothetical protein|Dbxref=PFAM:PF00808;InterPro:IPR009072;InterPro:IPR027113;InterPro:IPR003958,PARKENT|GeneID=OUR12_006392-T1|Product=hypothetical protein|Dbxref=InterPro:IPR003956;InterPro:IPR009072;InterPr…
GO:0001401	PARKENT|GeneID=OUR12_017516-T1|Product=hypothetical protein|Dbxref=PFAM:PF17172;InterPro:IPR033468;InterPro:IPR017410;InterPro:IPR050931;PFAM:PF17171;InterPro:IPR012336
GO:0001405	PARKENT|GeneID=OUR12_012618-T1|Product=hypothetical protein|Dbxref=InterPro:IPR036869,PARKENT|GeneID=OUR12_019745-T1|Product=hypothetical protein|Dbxref=InterPro:IPR036869;InterPro:IPR001623,PARKENT|GeneID=OUR12_026541-T1|Product=hypothetical protein|Dbxref=InterPro:IPR036869;InterPro:IPR001623,PARKENT|GeneID=OUR12_029654-T1|Product=hypothetical protein|Dbxref=InterPro:IPR013805;InterPro:IPR00901…
GO:0001510	PARKENT|GeneID=OUR12_003529-T1|Product=hypothetical protein|Dbxref=InterPro:IPR015507;InterPro:IPR024576;PFAM:PF11861;InterPro:IPR028589;InterPro:IPR050082;InterPro:IPR029063;InterPro:IPR002877;PFAM:PF07780;PFAM:PF01728;InterPro:IPR012920,PARKENT|GeneID=OUR12_004451-T1|Product=Putative 28S rRNA (cytosine-C(5))-methyltransferase|Dbxref=PFAM:PF01189;PFAM:PF21153;InterPro:IPR048889;InterPro:IPR04956…
GO:0001522	PARKENT|GeneID=OUR12_002837-T1|Product=hypothetical protein|Dbxref=InterPro:IPR001406;InterPro:IPR020103;InterPro:IPR020094;InterPro:IPR020095;PFAM:PF01416;InterPro:IPR020097,PARKENT|GeneID=OUR12_003809-T1|Product=hypothetical protein|Dbxref=InterPro:IPR006145;InterPro:IPR020103;PFAM:PF00849;InterPro:IPR050188,PARKENT|GeneID=OUR12_006340-T1|Product=hypothetical protein|Dbxref=InterPro:IPR001406;I…
GO:0001558	PARKENT|GeneID=OUR12_004509-T1|Product=hypothetical protein|Dbxref=InterPro:IPR008271;InterPro:IPR050647;PFAM:PF00069;InterPro:IPR017441;InterPro:IPR000719;PFAM:PF07714;InterPro:IPR011009
GO:0001561	PARKENT|GeneID=OUR12_007472-T1|Product=hypothetical protein|Dbxref=InterPro:IPR029061;InterPro:IPR045025;InterPro:IPR011766;InterPro:IPR000399,PARKENT|GeneID=OUR12_021760-T1|Product=hypothetical protein|Dbxref=PFAM:PF02775;InterPro:IPR011766;InterPro:IPR000399;PFAM:PF02776;InterPro:IPR045025;InterPro:IPR029035;InterPro:IPR012000;InterPro:IPR012001;PFAM:PF00205;InterPro:IPR029061,PARKENT|GeneID=OU…
GO:0001650	PARKENT|GeneID=OUR12_028606-T1|Product=hypothetical protein|Dbxref=InterPro:IPR049087;PFAM:PF20641;InterPro:IPR038801
GO:0001664	PARKENT|GeneID=OUR12_004517-T1|Product=guanine nucleotide-binding protein subunit alpha|Dbxref=InterPro:IPR011025;InterPro:IPR027417;InterPro:IPR002976;InterPro:IPR001019;PFAM:PF00503,PARKENT|GeneID=OUR12_026429-T1|Product=Extra-large guanine nucleotide-binding protein 3|Dbxref=InterPro:IPR011025;InterPro:IPR027417;InterPro:IPR001019,PARKENT|GeneID=OUR12_026430-T1|Product=G protein alpha subunit|…
GO:0001671	PARKENT|GeneID=OUR12_012101-T1|Product=hypothetical protein|Dbxref=InterPro:IPR001623;InterPro:IPR036386;InterPro:IPR036869;InterPro:IPR004640;PFAM:PF07743;InterPro:IPR009073,PARKENT|GeneID=OUR12_012618-T1|Product=hypothetical protein|Dbxref=InterPro:IPR036869,PARKENT|GeneID=OUR12_013473-T1|Product=hypothetical protein|Dbxref=InterPro:IPR023393;PFAM:PF09229;PFAM:PF08327;InterPro:IPR036338;InterPr…
GO:0001676	PARKENT|GeneID=OUR12_002507-T1|Product=acyl-coenzyme A oxidase|Dbxref=PFAM:PF14749;InterPro:IPR046373;InterPro:IPR006091;InterPro:IPR002655;InterPro:IPR012258;PFAM:PF01756;InterPro:IPR037069;PFAM:PF02770;InterPro:IPR055060;InterPro:IPR036250;InterPro:IPR029320;InterPro:IPR009100;PFAM:PF22924
GO:0001678	PARKENT|GeneID=OUR12_009098-T1|Product=hypothetical protein|Dbxref=InterPro:IPR022673;InterPro:IPR022672;InterPro:IPR043129;InterPro:IPR019807;InterPro:IPR001312,PARKENT|GeneID=OUR12_011225-T1|Product=hypothetical protein|Dbxref=InterPro:IPR022673;InterPro:IPR022672;InterPro:IPR043129;PFAM:PF00349;PFAM:PF03727;InterPro:IPR001312,PARKENT|GeneID=OUR12_014073-T1|Product=Hexokinase isoenzyme 2|Dbxref…
GO:0001680	PARKENT|GeneID=OUR12_028493-T1|Product=hypothetical protein|Dbxref=InterPro:IPR043519,PARKENT|GeneID=OUR12_028494-T1|Product=hypothetical protein|Dbxref=InterPro:IPR043519,PARKENT|GeneID=OUR12_028495-T1|Product=hypothetical protein|Dbxref=InterPro:IPR043519;InterPro:IPR002646
GO:0001682	PARKENT|GeneID=OUR12_004285-T1|Product=hypothetical protein|Dbxref=InterPro:IPR033443;InterPro:IPR011990,PARKENT|GeneID=OUR12_004288-T1|Product=hypothetical protein|Dbxref=InterPro:IPR033443;InterPro:IPR002885;InterPro:IPR011990;PFAM:PF01535,PARKENT|GeneID=OUR12_012622-T1|Product=hypothetical protein|Dbxref=InterPro:IPR023534;PFAM:PF01868;InterPro:IPR002730;InterPro:IPR016848;InterPro:IPR036980,P…
GO:0001709	PARKENT|GeneID=OUR12_001691-T1|Product=hypothetical protein|Dbxref=PFAM:PF24068;InterPro:IPR040361,PARKENT|GeneID=OUR12_004983-T1|Product=hypothetical protein|Dbxref=PFAM:PF24068;InterPro:IPR040361,PARKENT|GeneID=OUR12_006211-T1|Product=hypothetical protein|Dbxref=PFAM:PF24068;InterPro:IPR040361,PARKENT|GeneID=OUR12_015232-T1|Product=hypothetical protein|Dbxref=PFAM:PF24068;InterPro:IPR040361
GO:0001727	PARKENT|GeneID=OUR12_015505-T1|Product=hypothetical protein|Dbxref=PFAM:PF00781;InterPro:IPR050187;InterPro:IPR045540;PFAM:PF19279;InterPro:IPR016064;InterPro:IPR017438;InterPro:IPR001206,PARKENT|GeneID=OUR12_023895-T1|Product=Sphingoid long-chain bases kinase 2, mitochondrial|Dbxref=PFAM:PF00781;InterPro:IPR050187;InterPro:IPR045540;PFAM:PF19279;InterPro:IPR016064;InterPro:IPR017438;InterPro:IPR…
GO:0001729	PARKENT|GeneID=OUR12_024398-T1|Product=hypothetical protein|Dbxref=PFAM:PF00781;InterPro:IPR045363;InterPro:IPR050187;InterPro:IPR016064;InterPro:IPR017438;PFAM:PF19280;InterPro:IPR001206
GO:0001731	PARKENT|GeneID=OUR12_004417-T1|Product=hypothetical protein|Dbxref=PFAM:PF01253;InterPro:IPR050318;InterPro:IPR001950;InterPro:IPR048517;InterPro:IPR005873;InterPro:IPR036877;InterPro:IPR046447;PFAM:PF21023,PARKENT|GeneID=OUR12_008748-T1|Product=hypothetical protein|Dbxref=InterPro:IPR045196;InterPro:IPR016189;InterPro:IPR016190;InterPro:IPR002735;PFAM:PF01873,PARKENT|GeneID=OUR12_016315-T1|Produ…
GO:0001732	PARKENT|GeneID=OUR12_008748-T1|Product=hypothetical protein|Dbxref=InterPro:IPR045196;InterPro:IPR016189;InterPro:IPR016190;InterPro:IPR002735;PFAM:PF01873,PARKENT|GeneID=OUR12_020998-T1|Product=Eukaryotic translation initiation factor 3 subunit A|Dbxref=PFAM:PF01399;InterPro:IPR000717;InterPro:IPR054711;PFAM:PF22591;InterPro:IPR027512,PARKENT|GeneID=OUR12_021737-T1|Product=Eukaryotic translation…
GO:0001735	PARKENT|GeneID=OUR12_011690-T1|Product=hypothetical protein|Dbxref=InterPro:IPR017046;PFAM:PF07156;InterPro:IPR036188;InterPro:IPR010795,PARKENT|GeneID=OUR12_011691-T1|Product=hypothetical protein|Dbxref=PFAM:PF13450;InterPro:IPR017046;InterPro:IPR010795;InterPro:IPR036188
GO:0001763	PARKENT|GeneID=OUR12_023734-T1|Product=hypothetical protein|Dbxref=InterPro:IPR044989
GO:0001881	PARKENT|GeneID=OUR12_017832-T1|Product=hypothetical protein|Dbxref=InterPro:IPR001849;PFAM:PF00169;InterPro:IPR011993;InterPro:IPR045188
GO:0001934	PARKENT|GeneID=OUR12_005229-T1|Product=MOB kinase activator 1A|Dbxref=InterPro:IPR005301;InterPro:IPR036703,PARKENT|GeneID=OUR12_005230-T1|Product=MOB kinase activator 1A|Dbxref=InterPro:IPR005301;PFAM:PF03637;InterPro:IPR036703,PARKENT|GeneID=OUR12_017304-T1|Product=hypothetical protein|Dbxref=InterPro:IPR040040;PFAM:PF10377;InterPro:IPR019460,PARKENT|GeneID=OUR12_017306-T1|Product=hypothetical …
GO:0002058	PARKENT|GeneID=OUR12_025446-T1|Product=Dihydropyrimidine dehydrogenase [NADP(+)]|Dbxref=InterPro:IPR005720;InterPro:IPR013785;PFAM:PF01180
GO:0002084	PARKENT|GeneID=OUR12_015163-T1|Product=hypothetical protein|Dbxref=InterPro:IPR050565;PFAM:PF02230;PFAM:PF01738;InterPro:IPR029058;InterPro:IPR003140,PARKENT|GeneID=OUR12_015164-T1|Product=hypothetical protein|Dbxref=InterPro:IPR003140;InterPro:IPR029058;InterPro:IPR050565
GO:0002094	PARKENT|GeneID=OUR12_005855-T1|Product=hypothetical protein|Dbxref=InterPro:IPR036424;PFAM:PF01255;InterPro:IPR001441,PARKENT|GeneID=OUR12_008568-T1|Product=hypothetical protein|Dbxref=InterPro:IPR036424;PFAM:PF01255;InterPro:IPR018520;InterPro:IPR001441,PARKENT|GeneID=OUR12_010130-T1|Product=Dehydrodolichyl diphosphate synthase cpt3|Dbxref=InterPro:IPR036424;PFAM:PF01255;InterPro:IPR018520;Inter…
GO:0002098	PARKENT|GeneID=OUR12_000090-T1|Product=hypothetical protein|Dbxref=PFAM:PF08433;InterPro:IPR027417;PFAM:PF13671;InterPro:IPR013641,PARKENT|GeneID=OUR12_000441-T1|Product=Elongator subunit elp2|Dbxref=InterPro:IPR036322;InterPro:IPR037289;InterPro:IPR020472;PFAM:PF00400;InterPro:IPR001680;InterPro:IPR015943,PARKENT|GeneID=OUR12_011167-T1|Product=Elongator subunit elp4|Dbxref=InterPro:IPR027417;Int…
GO:0002100	PARKENT|GeneID=OUR12_000271-T1|Product=hypothetical protein|Dbxref=InterPro:IPR002125;PFAM:PF00383;InterPro:IPR016193;InterPro:IPR028883;PFAM:PF14437,PARKENT|GeneID=OUR12_017546-T1|Product=hypothetical protein|Dbxref=InterPro:IPR028883;InterPro:IPR002125;InterPro:IPR016193,PARKENT|GeneID=OUR12_021324-T1|Product=hypothetical protein|Dbxref=InterPro:IPR028883;PFAM:PF14437;InterPro:IPR016193,PARKENT…
GO:0002131	PARKENT|GeneID=OUR12_020675-T1|Product=hypothetical protein|Dbxref=InterPro:IPR016914;InterPro:IPR029028;InterPro:IPR029026;InterPro:IPR001537;PFAM:PF00588
GO:0002132	PARKENT|GeneID=OUR12_020675-T1|Product=hypothetical protein|Dbxref=InterPro:IPR016914;InterPro:IPR029028;InterPro:IPR029026;InterPro:IPR001537;PFAM:PF00588
GO:0002143	PARKENT|GeneID=OUR12_013683-T1|Product=hypothetical protein|Dbxref=InterPro:IPR014729;InterPro:IPR019407,PARKENT|GeneID=OUR12_026715-T1|Product=cytosolic thiouridylase subunit Ctu1|Dbxref=PFAM:PF01171;InterPro:IPR014729;PFAM:PF16503;InterPro:IPR032442;InterPro:IPR011063,PARKENT|GeneID=OUR12_029639-T1|Product=Adenylyltransferase and sulfurtransferase MOCS3|Dbxref=InterPro:IPR028885;InterPro:IPR045…
GO:0002144	PARKENT|GeneID=OUR12_026715-T1|Product=cytosolic thiouridylase subunit Ctu1|Dbxref=PFAM:PF01171;InterPro:IPR014729;PFAM:PF16503;InterPro:IPR032442;InterPro:IPR011063
GO:0002151	PARKENT|GeneID=OUR12_005650-T1|Product=hypothetical protein|Dbxref=InterPro:IPR008984;InterPro:IPR037912;InterPro:IPR025999;PFAM:PF00498;InterPro:IPR000253,PARKENT|GeneID=OUR12_027855-T1|Product=hypothetical protein|Dbxref=InterPro:IPR025999;InterPro:IPR037912,PARKENT|GeneID=OUR12_027856-T1|Product=hypothetical protein|Dbxref=InterPro:IPR008984;InterPro:IPR037912
GO:0002161	PARKENT|GeneID=OUR12_000244-T1|Product=hypothetical protein|Dbxref=PFAM:PF07973;InterPro:IPR002318;PFAM:PF02272;InterPro:IPR045864;InterPro:IPR018165;InterPro:IPR003156;InterPro:IPR018163;InterPro:IPR009000;InterPro:IPR023033;InterPro:IPR012947;InterPro:IPR018162;PFAM:PF01411;InterPro:IPR050058;InterPro:IPR018164,PARKENT|GeneID=OUR12_002449-T1|Product=hypothetical protein|Dbxref=InterPro:IPR03675…
GO:0002181	PARKENT|GeneID=OUR12_001600-T1|Product=60S ribosomal protein L17B|Dbxref=InterPro:IPR001063;PFAM:PF00237;InterPro:IPR018260;InterPro:IPR005721;InterPro:IPR036394,PARKENT|GeneID=OUR12_001602-T1|Product=hypothetical protein|Dbxref=InterPro:IPR001063;PFAM:PF00237;InterPro:IPR053973;InterPro:IPR018260;InterPro:IPR005721;InterPro:IPR036394,PARKENT|GeneID=OUR12_002111-T1|Product=ribosomal protein P1A|D…
GO:0002182	PARKENT|GeneID=OUR12_009285-T1|Product=hypothetical protein|Dbxref=PFAM:PF00428;InterPro:IPR038716;InterPro:IPR044076;InterPro:IPR027534,PARKENT|GeneID=OUR12_013135-T1|Product=hypothetical protein|Dbxref=PFAM:PF00428;InterPro:IPR038716;InterPro:IPR044076;InterPro:IPR027534,PARKENT|GeneID=OUR12_016319-T1|Product=hypothetical protein|Dbxref=PFAM:PF00428;InterPro:IPR038716;InterPro:IPR044076;InterPr…
GO:0002183	PARKENT|GeneID=OUR12_000728-T1|Product=Eukaryotic translation initiation factor 3 subunit I|Dbxref=InterPro:IPR036322;InterPro:IPR020472;InterPro:IPR019775;PFAM:PF00400;InterPro:IPR001680;InterPro:IPR027525;PFAM:PF24805;InterPro:IPR015943,PARKENT|GeneID=OUR12_005481-T1|Product=hypothetical protein|Dbxref=InterPro:IPR051960,PARKENT|GeneID=OUR12_022041-T1|Product=hypothetical protein|Dbxref=PFAM:PF…
GO:0002184	PARKENT|GeneID=OUR12_027718-T1|Product=Ethylene-responsive transcription factor 13|Dbxref=PFAM:PF03463;InterPro:IPR024049;InterPro:IPR029064;PFAM:PF03464;InterPro:IPR042226;InterPro:IPR005141;InterPro:IPR004403;InterPro:IPR005142;PFAM:PF03465;InterPro:IPR005140,PARKENT|GeneID=OUR12_028411-T1|Product=Ethylene-responsive transcription factor 13|Dbxref=PFAM:PF03463;InterPro:IPR024049;InterPro:IPR029…
GO:0002188	PARKENT|GeneID=OUR12_004417-T1|Product=hypothetical protein|Dbxref=PFAM:PF01253;InterPro:IPR050318;InterPro:IPR001950;InterPro:IPR048517;InterPro:IPR005873;InterPro:IPR036877;InterPro:IPR046447;PFAM:PF21023,PARKENT|GeneID=OUR12_020998-T1|Product=Eukaryotic translation initiation factor 3 subunit A|Dbxref=PFAM:PF01399;InterPro:IPR000717;InterPro:IPR054711;PFAM:PF22591;InterPro:IPR027512
GO:0002189	PARKENT|GeneID=OUR12_000827-T1|Product=ribose phosphate diphosphokinase subunit prs3|Dbxref=InterPro:IPR029057;InterPro:IPR005946;PFAM:PF00156;InterPro:IPR000836;PFAM:PF13793;InterPro:IPR029099,PARKENT|GeneID=OUR12_002658-T1|Product=ribose-phosphate pyrophosphokinase 1|Dbxref=InterPro:IPR029057;InterPro:IPR005946;PFAM:PF00156;PFAM:PF14572;PFAM:PF13793;InterPro:IPR000836;InterPro:IPR000842;InterPr…
GO:0002229	PARKENT|GeneID=OUR12_008432-T1|Product=hypothetical protein|Dbxref=InterPro:IPR001220;InterPro:IPR013320;InterPro:IPR008271;PFAM:PF00139;PFAM:PF00069;InterPro:IPR050528;InterPro:IPR017441;InterPro:IPR000719;PFAM:PF07714;InterPro:IPR011009,PARKENT|GeneID=OUR12_012249-T1|Product=hypothetical protein|Dbxref=InterPro:IPR001220;InterPro:IPR013320;InterPro:IPR008271;PFAM:PF00139;PFAM:PF00069;InterPro:I…
GO:0002926	PARKENT|GeneID=OUR12_019480-T1|Product=Elongator complex protein 1|Dbxref=InterPro:IPR036322;PFAM:PF23925;PFAM:PF23878;PFAM:PF23797;InterPro:IPR006849,PARKENT|GeneID=OUR12_019481-T1|Product=Elongator complex protein 1|Dbxref=InterPro:IPR035516;InterPro:IPR036322;PFAM:PF04762;InterPro:IPR006849,PARKENT|GeneID=OUR12_026380-T1|Product=Elongator complex protein 3|Dbxref=PFAM:PF23613;InterPro:IPR03468…
GO:0002938	PARKENT|GeneID=OUR12_022760-T1|Product=hypothetical protein|Dbxref=InterPro:IPR033671;InterPro:IPR029028;InterPro:IPR029026;InterPro:IPR001537;PFAM:PF00588
GO:0002939	PARKENT|GeneID=OUR12_000650-T1|Product=hypothetical protein|Dbxref=InterPro:IPR028564;InterPro:IPR038459;InterPro:IPR007356,PARKENT|GeneID=OUR12_015272-T1|Product=hypothetical protein|Dbxref=InterPro:IPR028564;InterPro:IPR038459;InterPro:IPR007356;InterPro:IPR016009,PARKENT|GeneID=OUR12_015273-T1|Product=tRNA methyltransferase 10|Dbxref=InterPro:IPR007356,PARKENT|GeneID=OUR12_016929-T1|Product=hy…
GO:0002940	PARKENT|GeneID=OUR12_022003-T1|Product=hypothetical protein|Dbxref=InterPro:IPR029063;InterPro:IPR042296;InterPro:IPR002905;PFAM:PF02005
GO:0002943	PARKENT|GeneID=OUR12_011208-T1|Product=hypothetical protein|Dbxref=InterPro:IPR013785;InterPro:IPR052582;InterPro:IPR035587;PFAM:PF01207;InterPro:IPR018517,PARKENT|GeneID=OUR12_020601-T1|Product=hypothetical protein|Dbxref=InterPro:IPR004653;InterPro:IPR035587;PFAM:PF01207;InterPro:IPR013785,PARKENT|GeneID=OUR12_020603-T1|Product=hypothetical protein|Dbxref=InterPro:IPR004653
GO:0002949	PARKENT|GeneID=OUR12_003735-T1|Product=hypothetical protein|Dbxref=InterPro:IPR013926;PFAM:PF08617;InterPro:IPR036504,PARKENT|GeneID=OUR12_007575-T1|Product=Gcp2p|Dbxref=InterPro:IPR034680;PFAM:PF00814;InterPro:IPR043129;InterPro:IPR000905;InterPro:IPR017861,PARKENT|GeneID=OUR12_023493-T1|Product=glutamated carboxypeptidase|Dbxref=PFAM:PF00814;InterPro:IPR043129;InterPro:IPR000905;InterPro:IPR022…
GO:0002953	PARKENT|GeneID=OUR12_000260-T1|Product=hypothetical protein|Dbxref=InterPro:IPR039356;InterPro:IPR006674,PARKENT|GeneID=OUR12_000262-T1|Product=hypothetical protein|Dbxref=InterPro:IPR039356;PFAM:PF13023;InterPro:IPR006674,PARKENT|GeneID=OUR12_000263-T1|Product=hypothetical protein|Dbxref=InterPro:IPR039356;PFAM:PF13023;InterPro:IPR006674,PARKENT|GeneID=OUR12_017339-T1|Product=hypothetical protei…
GO:0003333	PARKENT|GeneID=OUR12_000334-T1|Product=hypothetical protein|Dbxref=PFAM:PF01490;InterPro:IPR013057,PARKENT|GeneID=OUR12_001161-T1|Product=hypothetical protein|Dbxref=PFAM:PF01490;PFAM:PF03222;InterPro:IPR013057,PARKENT|GeneID=OUR12_001392-T1|Product=hypothetical protein|Dbxref=InterPro:IPR013057,PARKENT|GeneID=OUR12_001505-T1|Product=Lysine histidine transporter 1|Dbxref=PFAM:PF01490;InterPro:IPR…
GO:0003400	PARKENT|GeneID=OUR12_000549-T1|Product=hypothetical protein|Dbxref=InterPro:IPR045260;PFAM:PF00400;InterPro:IPR001680;InterPro:IPR011047;InterPro:IPR015943,PARKENT|GeneID=OUR12_006182-T1|Product=GTP-binding protein SAR1a|Dbxref=InterPro:IPR027417;InterPro:IPR006687;InterPro:IPR006689;PFAM:PF09439;InterPro:IPR005225;PFAM:PF00071;PFAM:PF01926;PFAM:PF08477;PFAM:PF00025,PARKENT|GeneID=OUR12_009918-T1…
GO:0003676	PARKENT|GeneID=OUR12_000042-T1|Product=hypothetical protein|Dbxref=InterPro:IPR035979;InterPro:IPR002075;InterPro:IPR012677;PFAM:PF02136;InterPro:IPR032710;InterPro:IPR000504;InterPro:IPR039539;InterPro:IPR018222;PFAM:PF00076,PARKENT|GeneID=OUR12_000119-T
GO:0003677	PARKENT|GeneID=OUR12_000016-T1|Product=Agamous-like MADS-box protein mads2|Dbxref=PFAM:PF00319;PFAM:PF01486;InterPro:IPR002487;InterPro:IPR002100;InterPro:IPR033896;InterPro:IPR036879;InterPro:IPR050142,PARKENT|GeneID=OUR12_000020-T1|Product=hypothetical
GO:0003678	PARKENT|GeneID=OUR12_001818-T1|Product=General transcription and DNA repair factor IIH helicase subunit xpb1|Dbxref=PFAM:PF13625;InterPro:IPR027417;InterPro:IPR014001;InterPro:IPR001650;PFAM:PF16203;InterPro:IPR032830;InterPro:IPR050615;InterPro:IPR001161;PFAM:PF04851;InterPro:IPR032438;PFAM:PF00271;InterPro:IPR006935,PARKENT|GeneID=OUR12_003146-T1|Product=DNA replication licensing factor, mcm4 c…
GO:0003680	PARKENT|GeneID=OUR12_002193-T1|Product=hypothetical protein|Dbxref=InterPro:IPR039605;InterPro:IPR017956;InterPro:IPR005175;PFAM:PF03479,PARKENT|GeneID=OUR12_002359-T1|Product=AT-hook motif nuclear-localized protein 24|Dbxref=InterPro:IPR014476;InterPro:IPR005175;PFAM:PF03479,PARKENT|GeneID=OUR12_002365-T1|Product=AT-hook motif nuclear-localized protein 1|Dbxref=InterPro:IPR039605;InterPro:IPR005…
GO:0003682	PARKENT|GeneID=OUR12_000161-T1|Product=hypothetical protein|Dbxref=InterPro:IPR001650;InterPro:IPR000330;PFAM:PF11496;PFAM:PF04851;PFAM:PF06465;InterPro:IPR011011;PFAM:PF00271;PFAM:PF00385;InterPro:IPR014001;InterPro:IPR027417;InterPro:IPR013083;InterPro:IPR019786;PFAM:PF00176;InterPro:IPR023780;InterPro:IPR009057;InterPro:IPR038718;InterPro:IPR016197;InterPro:IPR049730;InterPro:IPR001965;PFAM:PF…
GO:0003684	PARKENT|GeneID=OUR12_000132-T1|Product=hypothetical protein|Dbxref=InterPro:IPR043128;PFAM:PF00817;InterPro:IPR036775;InterPro:IPR017961;InterPro:IPR001126;InterPro:IPR043502;PFAM:PF11799;InterPro:IPR052230,PARKENT|GeneID=OUR12_000362-T1|Product=Ubiquitin receptor RAD23c|Dbxref=InterPro:IPR009060;InterPro:IPR036353;PFAM:PF00240;PFAM:PF00627;InterPro:IPR029071;InterPro:IPR015940;InterPro:IPR000626…
GO:0003688	PARKENT|GeneID=OUR12_000472-T1|Product=origin recognition complex subunit 4|Dbxref=InterPro:IPR032705;PFAM:PF00004;PFAM:PF13401;InterPro:IPR027417;InterPro:IPR016527;InterPro:IPR003959;InterPro:IPR003593,PARKENT|GeneID=OUR12_001584-T1|Product=Origin recognition complex subunit 3|Dbxref=InterPro:IPR020795;InterPro:IPR045667,PARKENT|GeneID=OUR12_003315-T1|Product=hypothetical protein|Dbxref=InterPr…
GO:0003689	PARKENT|GeneID=OUR12_002255-T1|Product=Subunit of heteropentameric Replication factor C (RF-C)|Dbxref=PFAM:PF00004;InterPro:IPR027417;InterPro:IPR047854;PFAM:PF08542;PFAM:PF13177;InterPro:IPR013748;InterPro:IPR050238;InterPro:IPR003959;InterPro:IPR008921;PFAM:PF13173;InterPro:IPR003593,PARKENT|GeneID=OUR12_002751-T1|Product=hypothetical protein|Dbxref=InterPro:IPR008921;InterPro:IPR027417;InterPr…
GO:0003690	PARKENT|GeneID=OUR12_000353-T1|Product=Homologous-pairing protein 2|Dbxref=InterPro:IPR010776;InterPro:IPR040661;PFAM:PF07106;PFAM:PF18517;InterPro:IPR036388,PARKENT|GeneID=OUR12_000545-T1|Product=hypothetical protein|Dbxref=PFAM:PF00538;InterPro:IPR036390;InterPro:IPR017956;InterPro:IPR005818;InterPro:IPR036388,PARKENT|GeneID=OUR12_000585-T1|Product=hypothetical protein|Dbxref=PFAM:PF00538;Inter…
GO:0003691	PARKENT|GeneID=OUR12_007201-T1|Product=DNA repair protein rad50|Dbxref=InterPro:IPR027417;PFAM:PF13476;InterPro:IPR038729,PARKENT|GeneID=OUR12_007202-T1|Product=DNA repair protein rad50|Dbxref=,PARKENT|GeneID=OUR12_007203-T1|Product=DNA repair protein rad50|Dbxref=InterPro:IPR027417;PFAM:PF13304;PFAM:PF04423;PFAM:PF13558;InterPro:IPR013134;InterPro:IPR003959,PARKENT|GeneID=OUR12_011305-T1|Product…
GO:0003697	PARKENT|GeneID=OUR12_001095-T1|Product=Single-stranded DNA-binding protein why1, chloroplastic|Dbxref=InterPro:IPR009044;InterPro:IPR013742;PFAM:PF08536,PARKENT|GeneID=OUR12_001745-T1|Product=hypothetical protein|Dbxref=InterPro:IPR027417,PARKENT|GeneID=OUR12_001787-T1|Product=hypothetical protein|Dbxref=InterPro:IPR018525;InterPro:IPR012340;InterPro:IPR027417;InterPro:IPR027925;PFAM:PF00493;PFAM…
GO:0003700	PARKENT|GeneID=OUR12_000014-T1|Product=Agamous-like MADS-box protein ap1|Dbxref=PFAM:PF01486;InterPro:IPR050142;InterPro:IPR002487,PARKENT|GeneID=OUR12_000016-T1|Product=Agamous-like MADS-box protein mads2|Dbxref=PFAM:PF00319;PFAM:PF01486;InterPro:IPR0024
GO:0003711	PARKENT|GeneID=OUR12_021728-T1|Product=hypothetical protein|Dbxref=InterPro:IPR019194;InterPro:IPR027093;PFAM:PF09816
GO:0003712	PARKENT|GeneID=OUR12_000463-T1|Product=hypothetical protein|Dbxref=PFAM:PF20474;InterPro:IPR046467;InterPro:IPR021950;PFAM:PF12090;InterPro:IPR046468,PARKENT|GeneID=OUR12_001380-T1|Product=hypothetical protein|Dbxref=InterPro:IPR034870;InterPro:IPR036443;InterPro:IPR035979;InterPro:IPR012677;InterPro:IPR001876;InterPro:IPR000504;PFAM:PF00076,PARKENT|GeneID=OUR12_001384-T1|Product=Pre-mRNA-process…
GO:0003713	PARKENT|GeneID=OUR12_001809-T1|Product=hypothetical protein|Dbxref=InterPro:IPR044852,PARKENT|GeneID=OUR12_002011-T1|Product=hypothetical protein|Dbxref=PFAM:PF02229;InterPro:IPR014876;InterPro:IPR009044;InterPro:IPR045125;InterPro:IPR017415;InterPro:IPR003173;PFAM:PF08766,PARKENT|GeneID=OUR12_003426-T1|Product=hypothetical protein|Dbxref=PFAM:PF06244;InterPro:IPR054414;InterPro:IPR010422,PARKENT…
GO:0003714	PARKENT|GeneID=OUR12_001021-T1|Product=hypothetical protein|Dbxref=InterPro:IPR013194;PFAM:PF02671;InterPro:IPR036600;PFAM:PF08295;InterPro:IPR003822;PFAM:PF16879;InterPro:IPR031693;InterPro:IPR039774,PARKENT|GeneID=OUR12_003112-T1|Product=hypothetical protein|Dbxref=InterPro:IPR019339;PFAM:PF10197;InterPro:IPR040014,PARKENT|GeneID=OUR12_006394-T1|Product=hypothetical protein|Dbxref=InterPro:IPR0…
GO:0003721	PARKENT|GeneID=OUR12_020643-T1|Product=hypothetical protein|Dbxref=PFAM:PF21399;InterPro:IPR049139;InterPro:IPR000477;InterPro:IPR021891;InterPro:IPR003545,PARKENT|GeneID=OUR12_020644-T1|Product=hypothetical protein|Dbxref=InterPro:IPR003545
GO:0003723	PARKENT|GeneID=OUR12_000042-T1|Product=hypothetical protein|Dbxref=InterPro:IPR035979;InterPro:IPR002075;InterPro:IPR012677;PFAM:PF02136;InterPro:IPR032710;InterPro:IPR000504;InterPro:IPR039539;InterPro:IPR018222;PFAM:PF00076,PARKENT|GeneID=OUR12_000077-T
GO:0003724	PARKENT|GeneID=OUR12_000981-T1|Product=hypothetical protein|Dbxref=InterPro:IPR027417;InterPro:IPR001650;InterPro:IPR014001;PFAM:PF00270;InterPro:IPR014014;InterPro:IPR011545;PFAM:PF00271,PARKENT|GeneID=OUR12_001020-T1|Product=DExH-box ATP-dependent RNA helicase DExH15 chloroplastic|Dbxref=InterPro:IPR027417;PFAM:PF22527;InterPro:IPR014001;InterPro:IPR001650;InterPro:IPR050699;PFAM:PF00270;PFAM:P…
GO:0003725	PARKENT|GeneID=OUR12_000788-T1|Product=Pre-mRNA-splicing factor ATP-dependent RNA helicase DEAH10|Dbxref=PFAM:PF21010;InterPro:IPR027417;InterPro:IPR014001;InterPro:IPR001650;PFAM:PF04408;PFAM:PF00270;InterPro:IPR007502;InterPro:IPR048333;InterPro:IPR011545;PFAM:PF00271;InterPro:IPR002464,PARKENT|GeneID=OUR12_003803-T1|Product=hypothetical protein|Dbxref=PFAM:PF06658;InterPro:IPR009548,PARKENT|Ge…
GO:0003726	PARKENT|GeneID=OUR12_024030-T1|Product=tRNA-specific adenosine deaminase 1|Dbxref=InterPro:IPR002466
GO:0003727	PARKENT|GeneID=OUR12_001094-T1|Product=hypothetical protein|Dbxref=InterPro:IPR051714,PARKENT|GeneID=OUR12_004631-T1|Product=hypothetical protein|Dbxref=InterPro:IPR007581;PFAM:PF04493,PARKENT|GeneID=OUR12_006207-T1|Product=hypothetical protein|Dbxref=InterPro:IPR003107;InterPro:IPR044624;InterPro:IPR019734;PFAM:PF13428;PFAM:PF13432;InterPro:IPR011990,PARKENT|GeneID=OUR12_006208-T1|Product=hypoth…
GO:0003729	PARKENT|GeneID=OUR12_000042-T1|Product=hypothetical protein|Dbxref=InterPro:IPR035979;InterPro:IPR002075;InterPro:IPR012677;PFAM:PF02136;InterPro:IPR032710;InterPro:IPR000504;InterPro:IPR039539;InterPro:IPR018222;PFAM:PF00076,PARKENT|GeneID=OUR12_000157-T
GO:0003730	PARKENT|GeneID=OUR12_003771-T1|Product=poly(A) binding protein Pab2|Dbxref=PFAM:PF13893;InterPro:IPR003954;PFAM:PF00658;InterPro:IPR006515;InterPro:IPR045305;InterPro:IPR035979;InterPro:IPR012677;InterPro:IPR034364;InterPro:IPR000504;InterPro:IPR036053;InterPro:IPR002004;PFAM:PF00076,PARKENT|GeneID=OUR12_010490-T1|Product=hypothetical protein|Dbxref=InterPro:IPR000504;InterPro:IPR035979;InterPro:…
GO:0003735	PARKENT|GeneID=OUR12_000077-T1|Product=Protein component of the small (40S) ribosomal subunit|Dbxref=InterPro:IPR001266;InterPro:IPR036390;InterPro:IPR018277;PFAM:PF01090;InterPro:IPR036388,PARKENT|GeneID=OUR12_000157-T1|Product=hypothetical protein|Dbxre
GO:0003743	PARKENT|GeneID=OUR12_000728-T1|Product=Eukaryotic translation initiation factor 3 subunit I|Dbxref=InterPro:IPR036322;InterPro:IPR020472;InterPro:IPR019775;PFAM:PF00400;InterPro:IPR001680;InterPro:IPR027525;PFAM:PF24805;InterPro:IPR015943,PARKENT|GeneID=OUR12_000793-T1|Product=hypothetical protein|Dbxref=PFAM:PF00657;InterPro:IPR036514;PFAM:PF06273;InterPro:IPR001087;InterPro:IPR035669;InterPro:I…
GO:0003746	PARKENT|GeneID=OUR12_002407-T1|Product=Nonribosomal peptide synthetase 7|Dbxref=InterPro:IPR000640;PFAM:PF14492;InterPro:IPR027417;InterPro:IPR000795;InterPro:IPR035649;PFAM:PF22042;PFAM:PF03144;InterPro:IPR004161;PFAM:PF03764;InterPro:IPR030848;InterPro:IPR005517;InterPro:IPR014721;InterPro:IPR020568;InterPro:IPR005225;InterPro:IPR004540;InterPro:IPR035647;PFAM:PF00009;InterPro:IPR041095;InterPr…
GO:0003747	PARKENT|GeneID=OUR12_002379-T1|Product=hypothetical protein|Dbxref=PFAM:PF00472;InterPro:IPR000352,PARKENT|GeneID=OUR12_005408-T1|Product=hypothetical protein|Dbxref=InterPro:IPR001810;InterPro:IPR032675;InterPro:IPR005139;PFAM:PF23622;PFAM:PF00646;PFAM:PF03462;InterPro:IPR045853;InterPro:IPR053781;PFAM:PF00472;InterPro:IPR036047;InterPro:IPR004374;InterPro:IPR000352,PARKENT|GeneID=OUR12_009733-T…
GO:0003755	PARKENT|GeneID=OUR12_000107-T1|Product=hypothetical protein|Dbxref=InterPro:IPR046357;InterPro:IPR050421;PFAM:PF13041;PFAM:PF00254;PFAM:PF12854;PFAM:PF13812;InterPro:IPR002885;InterPro:IPR011990;InterPro:IPR001179;PFAM:PF01535,PARKENT|GeneID=OUR12_000178-T1|Product=Vacuolar protein sorting-associated protein 52|Dbxref=PFAM:PF00957;InterPro:IPR046357;PFAM:PF13774;PFAM:PF00254;InterPro:IPR001388;In…
GO:0003756	PARKENT|GeneID=OUR12_000495-T1|Product=Sulfhydryl oxidase 1|Dbxref=InterPro:IPR036774;InterPro:IPR013766;PFAM:PF04777;InterPro:IPR039798;InterPro:IPR017937;PFAM:PF00085;InterPro:IPR036249;InterPro:IPR017905,PARKENT|GeneID=OUR12_008153-T1|Product=Protein disulfide isomerase-like 1-4|Dbxref=InterPro:IPR013766;InterPro:IPR005788;PFAM:PF13848;PFAM:PF13098;InterPro:IPR017937;PFAM:PF00085;InterPro:IPR0…
GO:0003774	PARKENT|GeneID=OUR12_004512-T1|Product=hypothetical protein|Dbxref=InterPro:IPR036018;InterPro:IPR027417;InterPro:IPR037975;PFAM:PF00063;PFAM:PF00612;InterPro:IPR036961;InterPro:IPR002710;PFAM:PF01843;InterPro:IPR004009;InterPro:IPR000048;InterPro:IPR001609,PARKENT|GeneID=OUR12_007065-T1|Product=hypothetical protein|Dbxref=InterPro:IPR027417;PFAM:PF00612;InterPro:IPR036961;InterPro:IPR002710;Inte…
GO:0003777	PARKENT|GeneID=OUR12_000831-T1|Product=hypothetical protein|Dbxref=PFAM:PF16796;InterPro:IPR027417;InterPro:IPR001752;InterPro:IPR027640;InterPro:IPR036961,PARKENT|GeneID=OUR12_002181-T1|Product=hypothetical protein|Dbxref=PFAM:PF16796;PFAM:PF00225;InterPro:IPR027417;InterPro:IPR001752;InterPro:IPR036872;InterPro:IPR027640;InterPro:IPR001715;InterPro:IPR023395;InterPro:IPR036961;InterPro:IPR01810…
GO:0003779	PARKENT|GeneID=OUR12_001013-T1|Product=hypothetical protein|Dbxref=InterPro:IPR015425;InterPro:IPR042201;InterPro:IPR027643,PARKENT|GeneID=OUR12_001943-T1|Product=hypothetical protein|Dbxref=InterPro:IPR011684,PARKENT|GeneID=OUR12_003301-T1|Product=Actin-depolymerizing factor 5|Dbxref=PFAM:PF00241;InterPro:IPR029006;InterPro:IPR002108;InterPro:IPR017904,PARKENT|GeneID=OUR12_003571-T1|Product=F-ac…
GO:0003785	PARKENT|GeneID=OUR12_004341-T1|Product=Glutamate 5-kinase|Dbxref=InterPro:IPR048278;InterPro:IPR036140;PFAM:PF00235;InterPro:IPR005455;InterPro:IPR027310,PARKENT|GeneID=OUR12_014067-T1|Product=Profilin-1|Dbxref=InterPro:IPR048278;InterPro:IPR036140;PFAM:PF00235;InterPro:IPR005455;InterPro:IPR027310,PARKENT|GeneID=OUR12_016773-T1|Product=hypothetical protein|Dbxref=InterPro:IPR048278;InterPro:IPR0…
GO:0003824	PARKENT|GeneID=OUR12_000063-T1|Product=hypothetical protein|Dbxref=InterPro:IPR000073;PFAM:PF12697;PFAM:PF12146;InterPro:IPR000639;InterPro:IPR029058,PARKENT|GeneID=OUR12_000124-T1|Product=hypothetical protein|Dbxref=InterPro:IPR005303;InterPro:IPR005302;
GO:0003830	PARKENT|GeneID=OUR12_000802-T1|Product=hypothetical protein|Dbxref=PFAM:PF04724;InterPro:IPR006813,PARKENT|GeneID=OUR12_017067-T1|Product=hypothetical protein|Dbxref=PFAM:PF04724;InterPro:IPR006813,PARKENT|GeneID=OUR12_022377-T1|Product=hypothetical protein|Dbxref=PFAM:PF04724;InterPro:IPR006813
GO:0003837	PARKENT|GeneID=OUR12_004134-T1|Product=Beta-ureidopropionase|Dbxref=InterPro:IPR036526;InterPro:IPR050345;InterPro:IPR003010;PFAM:PF00795
GO:0003838	PARKENT|GeneID=OUR12_013670-T1|Product=Cycloartenol-C-24-methyltransferase|Dbxref=InterPro:IPR013705;PFAM:PF08498;PFAM:PF13649;InterPro:IPR050447;PFAM:PF08241;InterPro:IPR030384;InterPro:IPR013216;InterPro:IPR029063;PFAM:PF13489;PFAM:PF13847,PARKENT|GeneID=OUR12_020579-T1|Product=Cycloartenol-C-24-methyltransferase|Dbxref=InterPro:IPR013705;PFAM:PF01209;InterPro:IPR050447;PFAM:PF13649;PFAM:PF0824…
GO:0003839	PARKENT|GeneID=OUR12_004610-T1|Product=Gamma-glutamylcyclotransferase 2-2|Dbxref=InterPro:IPR013024;InterPro:IPR006840;PFAM:PF04752,PARKENT|GeneID=OUR12_026918-T1|Product=Gamma-glutamylcyclotransferase 2-3|Dbxref=InterPro:IPR013024;InterPro:IPR006840;InterPro:IPR036568;PFAM:PF04752
GO:0003841	PARKENT|GeneID=OUR12_011772-T1|Product=1-acyl-sn-glycerol-3-phosphate acyltransferase 2|Dbxref=InterPro:IPR032098;PFAM:PF16076;PFAM:PF01553;InterPro:IPR002123,PARKENT|GeneID=OUR12_013622-T1|Product=1-acyl-sn-glycerol-3-phosphate acyltransferase 2|Dbxref=InterPro:IPR032098;PFAM:PF16076;PFAM:PF01553;InterPro:IPR002123,PARKENT|GeneID=OUR12_017252-T1|Product=1-acyl-sn-glycerol-3-phosphate acyltransfe…
GO:0003843	PARKENT|GeneID=OUR12_005998-T1|Product=Callose synthase 5|Dbxref=PFAM:PF25968;InterPro:IPR026899;InterPro:IPR023175;InterPro:IPR003440;InterPro:IPR039431;PFAM:PF14288;PFAM:PF04652,PARKENT|GeneID=OUR12_007935-T1|Product=Callose synthase 9|Dbxref=InterPro:IPR003440,PARKENT|GeneID=OUR12_007936-T1|Product=Callose synthase 9|Dbxref=InterPro:IPR003440,PARKENT|GeneID=OUR12_007937-T1|Product=Callose synt…
GO:0003844	PARKENT|GeneID=OUR12_013149-T1|Product=hypothetical protein|Dbxref=,PARKENT|GeneID=OUR12_013150-T1|Product=hypothetical protein|Dbxref=InterPro:IPR004193;InterPro:IPR013783;InterPro:IPR014756;PFAM:PF02922,PARKENT|GeneID=OUR12_013151-T1|Product=hypothetical protein|Dbxref=InterPro:IPR017853;InterPro:IPR006048;InterPro:IPR013780;InterPro:IPR006047;PFAM:PF02806,PARKENT|GeneID=OUR12_026685-T1|Product…
GO:0003848	PARKENT|GeneID=OUR12_000028-T1|Product=hypothetical protein|Dbxref=InterPro:IPR035907;PFAM:PF00809;InterPro:IPR000489;InterPro:IPR006390;InterPro:IPR011005;PFAM:PF01288;InterPro:IPR045031;InterPro:IPR000550
GO:0003849	PARKENT|GeneID=OUR12_002581-T1|Product=Phospho-2-dehydro-3-deoxyheptonate aldolase 1, chloroplastic|Dbxref=PFAM:PF01474;InterPro:IPR013785;InterPro:IPR002480,PARKENT|GeneID=OUR12_011047-T1|Product=Phospho-2-dehydro-3-deoxyheptonate aldolase 1, chloroplastic|Dbxref=PFAM:PF01474;InterPro:IPR013785;InterPro:IPR002480,PARKENT|GeneID=OUR12_027116-T1|Product=Phospho-2-dehydro-3-deoxyheptonate aldolase …
GO:0003852	PARKENT|GeneID=OUR12_007462-T1|Product=2-isopropylmalate synthase 1, chloroplastic|Dbxref=InterPro:IPR013709;PFAM:PF08502;InterPro:IPR036230,PARKENT|GeneID=OUR12_007463-T1|Product=hypothetical protein|Dbxref=PFAM:PF22617;InterPro:IPR054691;InterPro:IPR050073
GO:0003855	PARKENT|GeneID=OUR12_006478-T1|Product=hypothetical protein|Dbxref=InterPro:IPR013785;InterPro:IPR001381;InterPro:IPR046346;InterPro:IPR022893;PFAM:PF01488;PFAM:PF01487;InterPro:IPR036291;InterPro:IPR006151;InterPro:IPR013708;PFAM:PF08501,PARKENT|GeneID=OUR12_021240-T1|Product=hypothetical protein|Dbxref=PFAM:PF03807;InterPro:IPR041121;InterPro:IPR013785;InterPro:IPR001381;InterPro:IPR046346;Inte…
GO:0003856	PARKENT|GeneID=OUR12_002740-T1|Product=hypothetical protein|Dbxref=InterPro:IPR002812,PARKENT|GeneID=OUR12_005750-T1|Product=hypothetical protein|Dbxref=InterPro:IPR016037;InterPro:IPR030960;PFAM:PF13685;InterPro:IPR050071;PFAM:PF01761;PFAM:PF24621,PARKENT|GeneID=OUR12_007389-T1|Product=hypothetical protein|Dbxref=InterPro:IPR014729;InterPro:IPR002812,PARKENT|GeneID=OUR12_008965-T1|Product=hypoth…
GO:0003857	PARKENT|GeneID=OUR12_006096-T1|Product=hypothetical protein|Dbxref=InterPro:IPR029045;PFAM:PF16113;PFAM:PF00378;InterPro:IPR006176;InterPro:IPR006108;InterPro:IPR018376;PFAM:PF00725;InterPro:IPR036291;InterPro:IPR008927;InterPro:IPR001753;InterPro:IPR006180;PFAM:PF02737,PARKENT|GeneID=OUR12_016854-T1|Product=Altered inheritance of mitochondria protein 1|Dbxref=InterPro:IPR001753;InterPro:IPR02904…
GO:0003858	PARKENT|GeneID=OUR12_010795-T1|Product=Putative oxidoreductase glyr1|Dbxref=InterPro:IPR006115;InterPro:IPR002204;InterPro:IPR029154;PFAM:PF03446;InterPro:IPR013328;InterPro:IPR036291;InterPro:IPR008927;PFAM:PF14833;InterPro:IPR015815;InterPro:IPR051265
GO:0003860	PARKENT|GeneID=OUR12_002484-T1|Product=hypothetical protein|Dbxref=InterPro:IPR029045;PFAM:PF16113;InterPro:IPR045004;InterPro:IPR032259;PFAM:PF00378,PARKENT|GeneID=OUR12_005000-T1|Product=hypothetical protein|Dbxref=InterPro:IPR029045;PFAM:PF16113;InterPro:IPR045004;InterPro:IPR032259;PFAM:PF00378,PARKENT|GeneID=OUR12_014403-T1|Product=3-hydroxyisobutyryl-CoA hydrolase 1|Dbxref=InterPro:IPR02904…
GO:0003861	PARKENT|GeneID=OUR12_007004-T1|Product=3-isopropylmalate dehydratase large subunit, chloroplastic|Dbxref=InterPro:IPR050067;InterPro:IPR036008;InterPro:IPR033941;InterPro:IPR015931;InterPro:IPR001030,PARKENT|GeneID=OUR12_011992-T1|Product=3-isopropylmalate dehydratase large subunit, chloroplastic|Dbxref=InterPro:IPR050067;InterPro:IPR036008;InterPro:IPR033941;PFAM:PF00330;InterPro:IPR006251;Inter…
GO:0003864	PARKENT|GeneID=OUR12_023947-T1|Product=3-methyl-2-oxobutanoate hydroxymethyltransferase 1, mitochondrial|Dbxref=InterPro:IPR003700;InterPro:IPR015813;InterPro:IPR040442;PFAM:PF02548
GO:0003865	PARKENT|GeneID=OUR12_003187-T1|Product=hypothetical protein|Dbxref=InterPro:IPR001104;PFAM:PF02544;InterPro:IPR039698,PARKENT|GeneID=OUR12_005675-T1|Product=hypothetical protein|Dbxref=InterPro:IPR001104;PFAM:PF02544;InterPro:IPR039698,PARKENT|GeneID=OUR12_012916-T1|Product=Steroid 5-alpha-reductase det2|Dbxref=InterPro:IPR039357;InterPro:IPR001104;PFAM:PF02544;InterPro:IPR016636
GO:0003866	PARKENT|GeneID=OUR12_023485-T1|Product=3-phosphoshikimate 1-carboxyvinyltransferase 2|Dbxref=InterPro:IPR013792;InterPro:IPR036968;InterPro:IPR001986,PARKENT|GeneID=OUR12_023487-T1|Product=3-phosphoshikimate 1-carboxyvinyltransferase, chloroplastic|Dbxref=InterPro:IPR013792;InterPro:IPR036968;InterPro:IPR001986
GO:0003867	PARKENT|GeneID=OUR12_004234-T1|Product=Gamma aminobutyrate transaminase 3, chloroplastic|Dbxref=InterPro:IPR005814;InterPro:IPR015422;PFAM:PF00202;InterPro:IPR015424;InterPro:IPR015421;InterPro:IPR049704,PARKENT|GeneID=OUR12_004238-T1|Product=Gamma aminobutyrate transaminase 1, mitochondrial|Dbxref=InterPro:IPR005814;InterPro:IPR015422;PFAM:PF00202;InterPro:IPR015424;InterPro:IPR015421;InterPro:I…
GO:0003868	PARKENT|GeneID=OUR12_002805-T1|Product=hypothetical protein|Dbxref=InterPro:IPR041735;InterPro:IPR029068;InterPro:IPR005956;InterPro:IPR037523,PARKENT|GeneID=OUR12_017830-T1|Product=hypothetical protein|Dbxref=InterPro:IPR005956;InterPro:IPR041736;InterPro:IPR029068;InterPro:IPR037523;InterPro:IPR041735
GO:0003871	PARKENT|GeneID=OUR12_003232-T1|Product=methionine-synthesizing 5-methyltetrahydropteroyltriglutamate--homocysteine methyltransferase|Dbxref=InterPro:IPR002629;InterPro:IPR038071,PARKENT|GeneID=OUR12_004043-T1|Product=hypothetical protein|Dbxref=InterPro:IPR037595;InterPro:IPR002629,PARKENT|GeneID=OUR12_008856-T1|Product=hypothetical protein|Dbxref=PFAM:PF08267;InterPro:IPR038071;InterPro:IPR00262…
GO:0003872	PARKENT|GeneID=OUR12_004343-T1|Product=ATP-dependent 6-phosphofructokinase 3|Dbxref=PFAM:PF00365;InterPro:IPR050929;InterPro:IPR000023;InterPro:IPR022953;InterPro:IPR035966;InterPro:IPR012004,PARKENT|GeneID=OUR12_007147-T1|Product=hypothetical protein|Dbxref=InterPro:IPR035966,PARKENT|GeneID=OUR12_011097-T1|Product=ATP-dependent 6-phosphofructokinase 5, chloroplastic|Dbxref=PFAM:PF00365;InterPro:…
GO:0003873	PARKENT|GeneID=OUR12_008611-T1|Product=hypothetical protein|Dbxref=InterPro:IPR013784;PFAM:PF01591;InterPro:IPR027417;InterPro:IPR029033;InterPro:IPR013078;InterPro:IPR001345;InterPro:IPR003094;PFAM:PF00300;InterPro:IPR002044;InterPro:IPR013079;InterPro:IPR013783
GO:0003876	PARKENT|GeneID=OUR12_001064-T1|Product=hypothetical protein|Dbxref=PFAM:PF19326;InterPro:IPR032466;InterPro:IPR006329;InterPro:IPR006650,PARKENT|GeneID=OUR12_001065-T1|Product=hypothetical protein|Dbxref=InterPro:IPR006329;InterPro:IPR032466,PARKENT|GeneID=OUR12_012203-T1|Product=hypothetical protein|Dbxref=PFAM:PF19326;InterPro:IPR032466;InterPro:IPR006329;InterPro:IPR006650
GO:0003878	PARKENT|GeneID=OUR12_000868-T1|Product=ATP-citrate synthase alpha chain protein 1|Dbxref=InterPro:IPR002020;PFAM:PF08442;InterPro:IPR016102;InterPro:IPR032263;InterPro:IPR013650;PFAM:PF24948;PFAM:PF16114,PARKENT|GeneID=OUR12_006214-T1|Product=ATP-citrate synthase beta chain protein 2|Dbxref=InterPro:IPR002020;InterPro:IPR017440;InterPro:IPR033847;InterPro:IPR016102;InterPro:IPR005811;PFAM:PF00549…
GO:0003879	PARKENT|GeneID=OUR12_019009-T1|Product=ATP phosphoribosyltransferase 2, chloroplastic|Dbxref=InterPro:IPR001348;PFAM:PF08029;InterPro:IPR013115;InterPro:IPR018198;PFAM:PF01634;InterPro:IPR011322;InterPro:IPR015867;InterPro:IPR013820
GO:0003881	PARKENT|GeneID=OUR12_003324-T1|Product=CDP-diacylglycerol-inositol 3-phosphatidyltransferase|Dbxref=InterPro:IPR000462;InterPro:IPR043130
GO:0003883	PARKENT|GeneID=OUR12_001251-T1|Product=hypothetical protein|Dbxref=InterPro:IPR027417;InterPro:IPR004468;InterPro:IPR033828;InterPro:IPR017456;InterPro:IPR017926;InterPro:IPR029062;PFAM:PF00117,PARKENT|GeneID=OUR12_009896-T1|Product=hypothetical protein|Dbxref=InterPro:IPR004468;InterPro:IPR033828;InterPro:IPR017926;InterPro:IPR029062;PFAM:PF07722;PFAM:PF00117,PARKENT|GeneID=OUR12_009897-T1|Produ…
GO:0003885	PARKENT|GeneID=OUR12_004693-T1|Product=L-gulonolactone oxidase 3|Dbxref=InterPro:IPR016166;InterPro:IPR006094;InterPro:IPR036318;PFAM:PF04030;InterPro:IPR016167;InterPro:IPR016169;PFAM:PF22906;InterPro:IPR007173;InterPro:IPR050432;InterPro:IPR010030;PFAM:PF01565,PARKENT|GeneID=OUR12_013375-T1|Product=hypothetical protein|Dbxref=InterPro:IPR006094;InterPro:IPR010031;InterPro:IPR036318;PFAM:PF13716…
GO:0003886	PARKENT|GeneID=OUR12_002967-T1|Product=hypothetical protein|Dbxref=InterPro:IPR029063;InterPro:IPR050390;InterPro:IPR001525,PARKENT|GeneID=OUR12_007920-T1|Product=hypothetical protein|Dbxref=PFAM:PF01426;PFAM:PF00385;InterPro:IPR001025;InterPro:IPR001525;InterPro:IPR043151;InterPro:IPR023779;InterPro:IPR029063;InterPro:IPR016197;PFAM:PF00145;InterPro:IPR050390;InterPro:IPR018117;InterPro:IPR00095…
GO:0003887	PARKENT|GeneID=OUR12_000132-T1|Product=hypothetical protein|Dbxref=InterPro:IPR043128;PFAM:PF00817;InterPro:IPR036775;InterPro:IPR017961;InterPro:IPR001126;InterPro:IPR043502;PFAM:PF11799;InterPro:IPR052230,PARKENT|GeneID=OUR12_000982-T1|Product=hypothetical protein|Dbxref=InterPro:IPR002054;InterPro:IPR036420;InterPro:IPR043519;InterPro:IPR037160;PFAM:PF10391;InterPro:IPR029398;PFAM:PF14792;Inte…
GO:0003896	PARKENT|GeneID=OUR12_001964-T1|Product=hypothetical protein|Dbxref=InterPro:IPR002755;InterPro:IPR014052;PFAM:PF01896,PARKENT|GeneID=OUR12_024904-T1|Product=hypothetical protein|Dbxref=InterPro:IPR044917
GO:0003899	PARKENT|GeneID=OUR12_001289-T1|Product=hypothetical protein|Dbxref=InterPro:IPR037159;InterPro:IPR043502;InterPro:IPR029262;InterPro:IPR002092,PARKENT|GeneID=OUR12_001290-T1|Product=DNA-directed RNA polymerase 1B, mitochondrial|Dbxref=InterPro:IPR043502;InterPro:IPR029262;InterPro:IPR002092;InterPro:IPR046950;InterPro:IPR024075,PARKENT|GeneID=OUR12_001585-T1|Product=hypothetical protein|Dbxref=In…
GO:0003904	PARKENT|GeneID=OUR12_002376-T1|Product=DNA photolyase phr1|Dbxref=PFAM:PF00875;InterPro:IPR032673;InterPro:IPR052219;InterPro:IPR006050;InterPro:IPR036134;InterPro:IPR014729;InterPro:IPR008148;InterPro:IPR036155,PARKENT|GeneID=OUR12_004585-T1|Product=Myosin-3|Dbxref=PFAM:PF00875;InterPro:IPR005101;InterPro:IPR006050;InterPro:IPR036134;InterPro:IPR014133;InterPro:IPR002081;InterPro:IPR014729;PFAM:…
GO:0003905	PARKENT|GeneID=OUR12_013474-T1|Product=hypothetical protein|Dbxref=PFAM:PF02245;InterPro:IPR003180;InterPro:IPR011034;InterPro:IPR036995
GO:0003906	PARKENT|GeneID=OUR12_005714-T1|Product=hypothetical protein|Dbxref=InterPro:IPR020848;PFAM:PF03372;InterPro:IPR020847;InterPro:IPR010666;PFAM:PF06839;InterPro:IPR004808;InterPro:IPR005135;InterPro:IPR036691,PARKENT|GeneID=OUR12_007546-T1|Product=alpha,alpha-trehalase nth1|Dbxref=InterPro:IPR004035;InterPro:IPR003651;InterPro:IPR023170;InterPro:IPR003265;PFAM:PF10576;InterPro:IPR011257;PFAM:PF0073…
GO:0003909	PARKENT|GeneID=OUR12_009167-T1|Product=tRNA ligase|Dbxref=InterPro:IPR012340;InterPro:IPR012310;InterPro:IPR012309;PFAM:PF04679;InterPro:IPR050191;InterPro:IPR016059;InterPro:IPR000977,PARKENT|GeneID=OUR12_009168-T1|Product=tRNA ligase|Dbxref=InterPro:IPR012310;InterPro:IPR012308;PFAM:PF04675;InterPro:IPR050191;InterPro:IPR016059;InterPro:IPR000977;InterPro:IPR036599;PFAM:PF01068,PARKENT|GeneID=O…
GO:0003910	PARKENT|GeneID=OUR12_009167-T1|Product=tRNA ligase|Dbxref=InterPro:IPR012340;InterPro:IPR012310;InterPro:IPR012309;PFAM:PF04679;InterPro:IPR050191;InterPro:IPR016059;InterPro:IPR000977,PARKENT|GeneID=OUR12_009168-T1|Product=tRNA ligase|Dbxref=InterPro:IPR012310;InterPro:IPR012308;PFAM:PF04675;InterPro:IPR050191;InterPro:IPR016059;InterPro:IPR000977;InterPro:IPR036599;PFAM:PF01068,PARKENT|GeneID=O…
GO:0003913	PARKENT|GeneID=OUR12_004585-T1|Product=Myosin-3|Dbxref=PFAM:PF00875;InterPro:IPR005101;InterPro:IPR006050;InterPro:IPR036134;InterPro:IPR014133;InterPro:IPR002081;InterPro:IPR014729;PFAM:PF03441;InterPro:IPR036155
GO:0003916	PARKENT|GeneID=OUR12_004620-T1|Product=hypothetical protein|Dbxref=InterPro:IPR013497;InterPro:IPR013826;InterPro:IPR003602;InterPro:IPR005733;InterPro:IPR000380;InterPro:IPR028612;InterPro:IPR013824;PFAM:PF01131;PFAM:PF01751;InterPro:IPR006171;InterPro:IPR013825;InterPro:IPR023405;InterPro:IPR023406;InterPro:IPR003601;InterPro:IPR034149,PARKENT|GeneID=OUR12_007365-T1|Product=hypothetical protein…
GO:0003917	PARKENT|GeneID=OUR12_004619-T1|Product=hypothetical protein|Dbxref=InterPro:IPR025589;InterPro:IPR000380;PFAM:PF13368,PARKENT|GeneID=OUR12_004620-T1|Product=hypothetical protein|Dbxref=InterPro:IPR013497;InterPro:IPR013826;InterPro:IPR003602;InterPro:IPR005733;InterPro:IPR000380;InterPro:IPR028612;InterPro:IPR013824;PFAM:PF01131;PFAM:PF01751;InterPro:IPR006171;InterPro:IPR013825;InterPro:IPR02340…
GO:0003918	PARKENT|GeneID=OUR12_001855-T1|Product=hypothetical protein|Dbxref=InterPro:IPR002815;InterPro:IPR034136;InterPro:IPR036078,PARKENT|GeneID=OUR12_007993-T1|Product=DNA topoisomerase 6 subunit B|Dbxref=InterPro:IPR014721;InterPro:IPR005734;PFAM:PF09239;InterPro:IPR020568;InterPro:IPR050761;InterPro:IPR010979;InterPro:IPR036890;InterPro:IPR015320,PARKENT|GeneID=OUR12_012713-T1|Product=DNA topoisomer…
GO:0003919	PARKENT|GeneID=OUR12_013300-T1|Product=hypothetical protein|Dbxref=InterPro:IPR036425;InterPro:IPR002500;InterPro:IPR014729;PFAM:PF00994;InterPro:IPR001453,PARKENT|GeneID=OUR12_016407-T1|Product=FAD synthetase 1, chloroplastic|Dbxref=InterPro:IPR014729;InterPro:IPR015864
GO:0003921	PARKENT|GeneID=OUR12_000828-T1|Product=hypothetical protein|Dbxref=InterPro:IPR035902,PARKENT|GeneID=OUR12_001318-T1|Product=hypothetical protein|Dbxref=InterPro:IPR014729;InterPro:IPR025777,PARKENT|GeneID=OUR12_002177-T1|Product=hypothetical protein|Dbxref=InterPro:IPR025777;PFAM:PF03171;InterPro:IPR044861;InterPro:IPR027443;InterPro:IPR001674;InterPro:IPR017926;InterPro:IPR029062;InterPro:IPR01…
GO:0003922	PARKENT|GeneID=OUR12_002177-T1|Product=hypothetical protein|Dbxref=InterPro:IPR025777;PFAM:PF03171;InterPro:IPR044861;InterPro:IPR027443;InterPro:IPR001674;InterPro:IPR017926;InterPro:IPR029062;InterPro:IPR014729;InterPro:IPR022955;InterPro:IPR005123;PFAM:PF00958;PFAM:PF00117;InterPro:IPR004739
GO:0003923	PARKENT|GeneID=OUR12_021463-T1|Product=hypothetical protein|Dbxref=InterPro:IPR001096;PFAM:PF01650;InterPro:IPR028361
GO:0003924	PARKENT|GeneID=OUR12_000634-T1|Product=Phragmoplastin drp1c|Dbxref=InterPro:IPR027417;PFAM:PF01031;InterPro:IPR030381;InterPro:IPR000375;PFAM:PF02212;InterPro:IPR003130;InterPro:IPR020850;InterPro:IPR019762;PFAM:PF00350;InterPro:IPR022812;InterPro:IPR0014
GO:0003934	PARKENT|GeneID=OUR12_001175-T1|Product=GTP cyclohydrolase 1|Dbxref=InterPro:IPR043134;InterPro:IPR043133;InterPro:IPR020602;PFAM:PF01227;InterPro:IPR001474,PARKENT|GeneID=OUR12_001176-T1|Product=GTP cyclohydrolase 1|Dbxref=InterPro:IPR043134;InterPro:IPR001474;InterPro:IPR020602,PARKENT|GeneID=OUR12_004077-T1|Product=GTP cyclohydrolase 1|Dbxref=InterPro:IPR043134;InterPro:IPR043133;InterPro:IPR02…
GO:0003935	PARKENT|GeneID=OUR12_004143-T1|Product=Bifunctional riboflavin biosynthesis protein RIBA 1, chloroplastic|Dbxref=InterPro:IPR036144;InterPro:IPR032677;InterPro:IPR000926;InterPro:IPR016299;PFAM:PF00926;PFAM:PF00925;InterPro:IPR017945;InterPro:IPR000422,PARKENT|GeneID=OUR12_008301-T1|Product=Monofunctional riboflavin biosynthesis protein RIBA 3, chloroplastic|Dbxref=InterPro:IPR036144;InterPro:IPR…
GO:0003937	PARKENT|GeneID=OUR12_000158-T1|Product=hypothetical protein|Dbxref=PFAM:PF01808;InterPro:IPR002695;InterPro:IPR036914;InterPro:IPR011607;PFAM:PF02142;InterPro:IPR024051;InterPro:IPR016193,PARKENT|GeneID=OUR12_005265-T1|Product=hypothetical protein|Dbxref=InterPro:IPR007080;InterPro:IPR002695;InterPro:IPR036914;InterPro:IPR011607
GO:0003938	PARKENT|GeneID=OUR12_030309-T1|Product=hypothetical protein|Dbxref=PFAM:PF00478;InterPro:IPR005990;InterPro:IPR013785;InterPro:IPR015875;InterPro:IPR046342;InterPro:IPR001093;InterPro:IPR000644
GO:0003941	PARKENT|GeneID=OUR12_002207-T1|Product=hypothetical protein|Dbxref=InterPro:IPR001926;InterPro:IPR000634;InterPro:IPR036052;PFAM:PF00291,PARKENT|GeneID=OUR12_013224-T1|Product=Threonine dehydratase biosynthetic, chloroplastic|Dbxref=InterPro:IPR045865;InterPro:IPR000634;InterPro:IPR005787;PFAM:PF00291;InterPro:IPR036052;InterPro:IPR038110;InterPro:IPR001721;InterPro:IPR001926;InterPro:IPR050147;P…
GO:0003942	PARKENT|GeneID=OUR12_003691-T1|Product=hypothetical protein|Dbxref=InterPro:IPR023013;InterPro:IPR050085;PFAM:PF02774;InterPro:IPR000706;InterPro:IPR000534;InterPro:IPR036291;PFAM:PF22698;PFAM:PF01118
GO:0003948	PARKENT|GeneID=OUR12_024395-T1|Product=hypothetical protein|Dbxref=InterPro:IPR029055;PFAM:PF01112;InterPro:IPR000246
GO:0003949	PARKENT|GeneID=OUR12_013097-T1|Product=hypothetical protein|Dbxref=InterPro:IPR011256;InterPro:IPR013785;PFAM:PF04832;InterPro:IPR011858;InterPro:IPR006062;PFAM:PF00977;InterPro:IPR044524;InterPro:IPR011060;InterPro:IPR006917
GO:0003950	PARKENT|GeneID=OUR12_000900-T1|Product=hypothetical protein|Dbxref=InterPro:IPR022003;PFAM:PF00644;InterPro:IPR044964;InterPro:IPR012317;PFAM:PF12174,PARKENT|GeneID=OUR12_002791-T1|Product=hypothetical protein|Dbxref=InterPro:IPR022003;InterPro:IPR044964;InterPro:IPR012317;PFAM:PF12174;PFAM:PF23467,PARKENT|GeneID=OUR12_002794-T1|Product=hypothetical protein|Dbxref=InterPro:IPR022003;InterPro:IPR0…
GO:0003951	PARKENT|GeneID=OUR12_008088-T1|Product=hypothetical protein|Dbxref=InterPro:IPR002504;InterPro:IPR016064;InterPro:IPR017438;PFAM:PF01513;InterPro:IPR017437;PFAM:PF20143,PARKENT|GeneID=OUR12_026835-T1|Product=NAD kinase 2, mitochondrial|Dbxref=InterPro:IPR029021;InterPro:IPR002504;PFAM:PF22785;InterPro:IPR016064;PFAM:PF22741;InterPro:IPR017438;PFAM:PF01513;InterPro:IPR017437;PFAM:PF20143,PARKENT|G…
GO:0003952	PARKENT|GeneID=OUR12_002038-T1|Product=hypothetical protein|Dbxref=InterPro:IPR003694;PFAM:PF00795;PFAM:PF02540;InterPro:IPR022310;InterPro:IPR014729;InterPro:IPR014445;InterPro:IPR036526;InterPro:IPR003010
GO:0003954	PARKENT|GeneID=OUR12_003563-T1|Product=hypothetical protein|Dbxref=InterPro:IPR017900;PFAM:PF13187;PFAM:PF00037;PFAM:PF12838;PFAM:PF12800;InterPro:IPR017896;PFAM:PF13237;InterPro:IPR010226,PARKENT|GeneID=OUR12_008151-T1|Product=hypothetical protein|Dbxref=InterPro:IPR017900;PFAM:PF14697;PFAM:PF00361;PFAM:PF00037;PFAM:PF12838;InterPro:IPR017491;PFAM:PF12800;InterPro:IPR001750;InterPro:IPR017896;In…
GO:0003955	PARKENT|GeneID=OUR12_003608-T1|Product=hypothetical protein|Dbxref=PFAM:PF03358;InterPro:IPR005025;InterPro:IPR010089;InterPro:IPR029039;InterPro:IPR008254;PFAM:PF00258,PARKENT|GeneID=OUR12_005465-T1|Product=hypothetical protein|Dbxref=PFAM:PF03358;InterPro:IPR005025;InterPro:IPR010089;InterPro:IPR029039;InterPro:IPR008254;PFAM:PF00258,PARKENT|GeneID=OUR12_008553-T1|Product=Allatostatins [Cleaved…
GO:0003958	PARKENT|GeneID=OUR12_017659-T1|Product=MFS transporter multidrug-resistance type transporter|Dbxref=PFAM:PF00667;PFAM:PF00175;InterPro:IPR017927;InterPro:IPR039261;InterPro:IPR017938;InterPro:IPR001433;InterPro:IPR029039;InterPro:IPR001094;InterPro:IPR023208;InterPro:IPR008254;InterPro:IPR023173;PFAM:PF00258;InterPro:IPR001709;InterPro:IPR003097,PARKENT|GeneID=OUR12_027230-T1|Product=multidrug-re…
GO:0003959	PARKENT|GeneID=OUR12_005720-T1|Product=hypothetical protein|Dbxref=PFAM:PF00175;InterPro:IPR017927;InterPro:IPR039261;InterPro:IPR015701;InterPro:IPR017938;InterPro:IPR001433;InterPro:IPR035442;InterPro:IPR001709,PARKENT|GeneID=OUR12_016111-T1|Product=hypothetical protein|Dbxref=PFAM:PF00175;InterPro:IPR017927;InterPro:IPR039261;InterPro:IPR015701;InterPro:IPR017938;InterPro:IPR001433;InterPro:IP…
GO:0003960	PARKENT|GeneID=OUR12_014476-T1|Product=hypothetical protein|Dbxref=InterPro:IPR047618;PFAM:PF13602;InterPro:IPR013149;PFAM:PF08240;InterPro:IPR036291;InterPro:IPR020843;PFAM:PF00107;InterPro:IPR011032;InterPro:IPR013154,PARKENT|GeneID=OUR12_014478-T1|Product=hypothetical protein|Dbxref=InterPro:IPR047618;PFAM:PF13602;InterPro:IPR013149;PFAM:PF08240;InterPro:IPR036291;InterPro:IPR020843;PFAM:PF001…
GO:0003962	PARKENT|GeneID=OUR12_010521-T1|Product=hypothetical protein|Dbxref=InterPro:IPR015421;InterPro:IPR044639;InterPro:IPR000277;InterPro:IPR015424,PARKENT|GeneID=OUR12_022730-T1|Product=cAMP-dependent protein kinase regulatory subunit Cgs1|Dbxref=InterPro:IPR054542;PFAM:PF01053;InterPro:IPR044639;InterPro:IPR015422;InterPro:IPR015424;InterPro:IPR015421;InterPro:IPR000277,PARKENT|GeneID=OUR12_023258-T…
GO:0003964	PARKENT|GeneID=OUR12_010783-T1|Product=Nuclear intron maturase 4, mitochondrial|Dbxref=PFAM:PF00078;InterPro:IPR043502;InterPro:IPR000477;PFAM:PF01348;InterPro:IPR024937,PARKENT|GeneID=OUR12_013383-T1|Product=Nuclear intron maturase 3, mitochondrial|Dbxref=PFAM:PF01348;InterPro:IPR024937,PARKENT|GeneID=OUR12_020643-T1|Product=hypothetical protein|Dbxref=PFAM:PF21399;InterPro:IPR049139;InterPro:IP…
GO:0003968	PARKENT|GeneID=OUR12_000641-T1|Product=multidrug resistance protein|Dbxref=InterPro:IPR007855;PFAM:PF05183;PFAM:PF26253;PFAM:PF26252,PARKENT|GeneID=OUR12_000642-T1|Product=multidrug resistance protein|Dbxref=PFAM:PF05183;PFAM:PF26250;InterPro:IPR035979;PFAM:PF26252;InterPro:IPR007855;PFAM:PF24823;PFAM:PF26253,PARKENT|GeneID=OUR12_004881-T1|Product=RNA dependent RNA polymerase|Dbxref=PFAM:PF05183;…
GO:0003972	PARKENT|GeneID=OUR12_008202-T1|Product=hypothetical protein|Dbxref=InterPro:IPR038837,PARKENT|GeneID=OUR12_008204-T1|Product=hypothetical protein|Dbxref=InterPro:IPR038837,PARKENT|GeneID=OUR12_008205-T1|Product=hypothetical protein|Dbxref=InterPro:IPR038837
GO:0003975	PARKENT|GeneID=OUR12_013401-T1|Product=hypothetical protein|Dbxref=PFAM:PF00953;InterPro:IPR000715;InterPro:IPR033895
GO:0003977	PARKENT|GeneID=OUR12_000155-T1|Product=UDP-N-acetylglucosamine diphosphorylase 1|Dbxref=InterPro:IPR029044;InterPro:IPR002618;InterPro:IPR039741;PFAM:PF01704,PARKENT|GeneID=OUR12_019260-T1|Product=UTP--glucose-1-phosphate uridylyltransferase 3, chloroplastic|Dbxref=InterPro:IPR029044;PFAM:PF25441;InterPro:IPR039741;InterPro:IPR002618,PARKENT|GeneID=OUR12_026823-T1|Product=hypothetical protein|Dbx…
GO:0003978	PARKENT|GeneID=OUR12_001992-T1|Product=UDP-glucose 4-epimerase|Dbxref=PFAM:PF02719;InterPro:IPR016040;PFAM:PF04321;PFAM:PF16363;InterPro:IPR005886;InterPro:IPR036291;PFAM:PF01370;PFAM:PF01073,PARKENT|GeneID=OUR12_001995-T1|Product=UDP-glucose 4-epimerase|Dbxref=PFAM:PF02719;InterPro:IPR016040;PFAM:PF04321;PFAM:PF16363;InterPro:IPR005886;InterPro:IPR036291;PFAM:PF01370;PFAM:PF01073,PARKENT|GeneID=…
GO:0003979	PARKENT|GeneID=OUR12_000078-T1|Product=UDP-glucose 6-dehydrogenase 1|Dbxref=InterPro:IPR014027;PFAM:PF00984;InterPro:IPR028356;InterPro:IPR036220;InterPro:IPR001732;InterPro:IPR014026;PFAM:PF03721;InterPro:IPR036291;InterPro:IPR008927;InterPro:IPR017476;PFAM:PF03720,PARKENT|GeneID=OUR12_005382-T1|Product=hypothetical protein|Dbxref=InterPro:IPR028356;InterPro:IPR029346;InterPro:IPR001732,PARKENT|…
GO:0003980	PARKENT|GeneID=OUR12_018922-T1|Product=hypothetical protein|Dbxref=InterPro:IPR040694;InterPro:IPR009448;InterPro:IPR040693;PFAM:PF19160;PFAM:PF18401;InterPro:IPR043891;PFAM:PF18400,PARKENT|GeneID=OUR12_018923-T1|Product=hypothetical protein|Dbxref=InterPro:IPR009448;InterPro:IPR040692,PARKENT|GeneID=OUR12_018924-T1|Product=hypothetical protein|Dbxref=InterPro:IPR029044;InterPro:IPR009448;InterPr…
GO:0003983	PARKENT|GeneID=OUR12_005942-T1|Product=UTP--glucose-1-phosphate uridylyltransferase|Dbxref=InterPro:IPR029044;InterPro:IPR016267;InterPro:IPR002618;PFAM:PF01704
GO:0003984	PARKENT|GeneID=OUR12_007751-T1|Product=Acetolactate synthase small subunit 1, chloroplastic|Dbxref=InterPro:IPR045865;PFAM:PF22629;InterPro:IPR027271;InterPro:IPR039557;InterPro:IPR002912;PFAM:PF13710;InterPro:IPR004789;InterPro:IPR019455;PFAM:PF10369;PFAM:PF01842;InterPro:IPR054480,PARKENT|GeneID=OUR12_010824-T1|Product=Acetolactate synthase small subunit 1, chloroplastic|Dbxref=InterPro:IPR0458…
GO:0003985	PARKENT|GeneID=OUR12_018535-T1|Product=Acetyl-CoA acetyltransferase, cytosolic|Dbxref=InterPro:IPR020613;InterPro:IPR020610;InterPro:IPR020617;PFAM:PF02803;InterPro:IPR002155;InterPro:IPR016039;PFAM:PF00108;InterPro:IPR020616
GO:0003987	PARKENT|GeneID=OUR12_022085-T1|Product=hypothetical protein|Dbxref=InterPro:IPR045851,PARKENT|GeneID=OUR12_022086-T1|Product=Acetyl-coenzyme A synthetase, cytoplasmic|Dbxref=PFAM:PF00501;InterPro:IPR042099;InterPro:IPR000873;InterPro:IPR045851;InterPro:IPR020845;InterPro:IPR011904;InterPro:IPR032387;PFAM:PF13193;InterPro:IPR025110;PFAM:PF16177
GO:0003988	PARKENT|GeneID=OUR12_003217-T1|Product=3-ketoacyl-CoA thiolase 5, peroxisomal|Dbxref=InterPro:IPR020617;InterPro:IPR016039;InterPro:IPR050215,PARKENT|GeneID=OUR12_007129-T1|Product=3-ketoacyl-CoA thiolase 2, peroxisomal|Dbxref=InterPro:IPR020610;InterPro:IPR020613;InterPro:IPR020617;InterPro:IPR020615;PFAM:PF02803;InterPro:IPR002155;InterPro:IPR016039;PFAM:PF00108;InterPro:IPR050215;InterPro:IPR0…
GO:0003989	PARKENT|GeneID=OUR12_004230-T1|Product=Chromatin assembly factor 1 subunit p50|Dbxref=InterPro:IPR001095,PARKENT|GeneID=OUR12_005398-T1|Product=hypothetical protein|Dbxref=InterPro:IPR011053;InterPro:IPR050709;InterPro:IPR001249;PFAM:PF00364;InterPro:IPR000089,PARKENT|GeneID=OUR12_010723-T1|Product=Acetyl-CoA carboxylase 2|Dbxref=InterPro:IPR049076;InterPro:IPR013537,PARKENT|GeneID=OUR12_012915-T…
GO:0003991	PARKENT|GeneID=OUR12_004629-T1|Product=hypothetical protein|Dbxref=InterPro:IPR004662;InterPro:IPR001048;PFAM:PF00696;InterPro:IPR041727;InterPro:IPR037528;InterPro:IPR036393
GO:0003993	PARKENT|GeneID=OUR12_000052-T1|Product=polynucleotide adenylyltransferase|Dbxref=InterPro:IPR029052;PFAM:PF13947;InterPro:IPR008963;InterPro:IPR015914;PFAM:PF14008;InterPro:IPR004843;InterPro:IPR025733;InterPro:IPR041792;InterPro:IPR025287;PFAM:PF16656;InterPro:IPR032872;InterPro:IPR040974;PFAM:PF17808;PFAM:PF00149,PARKENT|GeneID=OUR12_000073-T1|Product=hypothetical protein|Dbxref=InterPro:IPR029…
GO:0003994	PARKENT|GeneID=OUR12_005782-T1|Product=Aconitate hydratase mitochondrial|Dbxref=InterPro:IPR000573;InterPro:IPR044137;InterPro:IPR006249;InterPro:IPR036008;PFAM:PF00694;PFAM:PF00330;InterPro:IPR015928;InterPro:IPR015931;InterPro:IPR018136;InterPro:IPR001030,PARKENT|GeneID=OUR12_018321-T1|Product=hypothetical protein|Dbxref=InterPro:IPR000573;InterPro:IPR044137;InterPro:IPR006249;InterPro:IPR03600…
GO:0003995	PARKENT|GeneID=OUR12_006119-T1|Product=Putative acyl-CoA dehydrogenase ibr3|Dbxref=InterPro:IPR046373;InterPro:IPR002575;InterPro:IPR006091;InterPro:IPR041726;PFAM:PF08028;PFAM:PF00441;InterPro:IPR037069;PFAM:PF02770;InterPro:IPR050741;PFAM:PF01636;InterPro:IPR009075;InterPro:IPR036250;InterPro:IPR011009;InterPro:IPR009100,PARKENT|GeneID=OUR12_008188-T1|Product=hypothetical protein|Dbxref=InterPr…
GO:0003997	PARKENT|GeneID=OUR12_002507-T1|Product=acyl-coenzyme A oxidase|Dbxref=PFAM:PF14749;InterPro:IPR046373;InterPro:IPR006091;InterPro:IPR002655;InterPro:IPR012258;PFAM:PF01756;InterPro:IPR037069;PFAM:PF02770;InterPro:IPR055060;InterPro:IPR036250;InterPro:IPR029320;InterPro:IPR009100;PFAM:PF22924,PARKENT|GeneID=OUR12_010970-T1|Product=hypothetical protein|Dbxref=InterPro:IPR046373;InterPro:IPR006091;I…
GO:0003999	PARKENT|GeneID=OUR12_002434-T1|Product=Adenine phosphoribosyltransferase 4|Dbxref=InterPro:IPR050120;InterPro:IPR000836;InterPro:IPR029057,PARKENT|GeneID=OUR12_004903-T1|Product=Adenine phosphoribosyltransferase 5|Dbxref=InterPro:IPR050120;InterPro:IPR029057;InterPro:IPR005764;PFAM:PF00156;InterPro:IPR000836,PARKENT|GeneID=OUR12_014400-T1|Product=hypothetical protein|Dbxref=InterPro:IPR050120;Int…
GO:0004000	PARKENT|GeneID=OUR12_015020-T1|Product=hypothetical protein|Dbxref=InterPro:IPR001365;InterPro:IPR032466;InterPro:IPR006330;PFAM:PF00962,PARKENT|GeneID=OUR12_024030-T1|Product=tRNA-specific adenosine deaminase 1|Dbxref=InterPro:IPR002466
GO:0004001	PARKENT|GeneID=OUR12_019817-T1|Product=hypothetical protein|Dbxref=InterPro:IPR001805;InterPro:IPR029056;InterPro:IPR011611
GO:0004013	PARKENT|GeneID=OUR12_007206-T1|Product=hypothetical protein|Dbxref=InterPro:IPR000043;PFAM:PF02826;InterPro:IPR015878;PFAM:PF00670;InterPro:IPR042172;InterPro:IPR020082;InterPro:IPR036291;PFAM:PF05221,PARKENT|GeneID=OUR12_026343-T1|Product=Adenosylhomocysteinase 1|Dbxref=InterPro:IPR000043;PFAM:PF02826;InterPro:IPR015878;PFAM:PF00670;InterPro:IPR042172;InterPro:IPR020082;InterPro:IPR036291;PFAM:P…
GO:0004014	PARKENT|GeneID=OUR12_001335-T1|Product=S-adenosylmethionine decarboxylase proenzyme|Dbxref=InterPro:IPR016067;InterPro:IPR018166;InterPro:IPR048283;InterPro:IPR001985;PFAM:PF01536,PARKENT|GeneID=OUR12_006515-T1|Product=S-adenosylmethionine decarboxylase proenzyme 4|Dbxref=InterPro:IPR016067;InterPro:IPR018166;InterPro:IPR048283;InterPro:IPR001985;PFAM:PF01536,PARKENT|GeneID=OUR12_007802-T1|Produc…
GO:0004015	PARKENT|GeneID=OUR12_004234-T1|Product=Gamma aminobutyrate transaminase 3, chloroplastic|Dbxref=InterPro:IPR005814;InterPro:IPR015422;PFAM:PF00202;InterPro:IPR015424;InterPro:IPR015421;InterPro:IPR049704,PARKENT|GeneID=OUR12_004238-T1|Product=Gamma aminobutyrate transaminase 1, mitochondrial|Dbxref=InterPro:IPR005814;InterPro:IPR015422;PFAM:PF00202;InterPro:IPR015424;InterPro:IPR015421;InterPro:I…
GO:0004017	PARKENT|GeneID=OUR12_001532-T1|Product=hypothetical protein|Dbxref=PFAM:PF00406;InterPro:IPR027417;PFAM:PF13207;InterPro:IPR033690;PFAM:PF05191;InterPro:IPR000850;InterPro:IPR006259;InterPro:IPR007862,PARKENT|GeneID=OUR12_008200-T1|Product=Adenylate kinase isoenzyme 6|Dbxref=PFAM:PF13238;InterPro:IPR027417;InterPro:IPR020618,PARKENT|GeneID=OUR12_017172-T1|Product=hypothetical protein|Dbxref=PFAM:…
GO:0004018	PARKENT|GeneID=OUR12_019687-T1|Product=hypothetical protein|Dbxref=InterPro:IPR008948;PFAM:PF08328;PFAM:PF00206;InterPro:IPR022761;InterPro:IPR013539;InterPro:IPR004769;InterPro:IPR000362;InterPro:IPR024083;InterPro:IPR047136;InterPro:IPR020557
GO:0004019	PARKENT|GeneID=OUR12_013623-T1|Product=hypothetical protein|Dbxref=InterPro:IPR041677;PFAM:PF23106;InterPro:IPR027417;PFAM:PF00709;PFAM:PF03016;InterPro:IPR042109;InterPro:IPR001114;InterPro:IPR048761;InterPro:IPR040911;InterPro:IPR042110;PFAM:PF21138;InterPro:IPR042111;InterPro:IPR033128;InterPro:IPR018220
GO:0004020	PARKENT|GeneID=OUR12_003893-T1|Product=Adenylyl-sulfate kinase 1, chloroplastic|Dbxref=PFAM:PF01583;InterPro:IPR002891;InterPro:IPR027417,PARKENT|GeneID=OUR12_006727-T1|Product=Sigma1B-adaptin|Dbxref=InterPro:IPR025980;PFAM:PF01747;InterPro:IPR024951;InterPro:IPR002650;PFAM:PF14306;InterPro:IPR014729;InterPro:IPR015947,PARKENT|GeneID=OUR12_011314-T1|Product=Adenylyl-sulfate kinase 2, chloroplasti…
GO:0004021	PARKENT|GeneID=OUR12_000826-T1|Product=hypothetical protein|Dbxref=InterPro:IPR004839;InterPro:IPR045088;PFAM:PF00155;InterPro:IPR015422;InterPro:IPR015424;InterPro:IPR015421,PARKENT|GeneID=OUR12_013763-T1|Product=Alanine--glyoxylate aminotransferase 2, mitochondrial|Dbxref=InterPro:IPR004839;InterPro:IPR045088;PFAM:PF00155;InterPro:IPR015422;InterPro:IPR015424;InterPro:IPR015421
GO:0004024	PARKENT|GeneID=OUR12_002101-T1|Product=hypothetical protein|Dbxref=PFAM:PF08240;InterPro:IPR002328;InterPro:IPR036291;InterPro:IPR011032;InterPro:IPR013154,PARKENT|GeneID=OUR12_002102-T1|Product=hypothetical protein|Dbxref=InterPro:IPR011032;InterPro:IPR036291;PFAM:PF00107;InterPro:IPR013149,PARKENT|GeneID=OUR12_005977-T1|Product=Alcohol dehydrogenase|Dbxref=InterPro:IPR013149;PFAM:PF08240;InterP…
GO:0004029	PARKENT|GeneID=OUR12_000738-T1|Product=hypothetical protein|Dbxref=InterPro:IPR016162;InterPro:IPR016163;InterPro:IPR015590;InterPro:IPR016161,PARKENT|GeneID=OUR12_000739-T1|Product=hypothetical protein|Dbxref=InterPro:IPR016162;InterPro:IPR015590;InterPro:IPR016163;InterPro:IPR029510;InterPro:IPR016161,PARKENT|GeneID=OUR12_000945-T1|Product=hypothetical protein|Dbxref=InterPro:IPR016162;InterPro…
GO:0004032	PARKENT|GeneID=OUR12_000701-T1|Product=Non-functional NADPH-dependent codeinone reductase 2-like|Dbxref=InterPro:IPR036812;InterPro:IPR018170;InterPro:IPR044497;InterPro:IPR023210;InterPro:IPR020471;PFAM:PF00248,PARKENT|GeneID=OUR12_000703-T1|Product=Non-functional NADPH-dependent codeinone reductase 2-like|Dbxref=InterPro:IPR036812;InterPro:IPR018170;InterPro:IPR044497;InterPro:IPR023210;InterPr…
GO:0004033	PARKENT|GeneID=OUR12_006716-T1|Product=hypothetical protein|Dbxref=PFAM:PF00248;InterPro:IPR036812;InterPro:IPR050791;InterPro:IPR023210,PARKENT|GeneID=OUR12_007373-T1|Product=hypothetical protein|Dbxref=PFAM:PF00248;InterPro:IPR036812;InterPro:IPR050791;InterPro:IPR023210,PARKENT|GeneID=OUR12_007377-T1|Product=hypothetical protein|Dbxref=PFAM:PF00248;InterPro:IPR036812;InterPro:IPR050791;InterPr…
GO:0004034	PARKENT|GeneID=OUR12_025488-T1|Product=hypothetical protein|Dbxref=InterPro:IPR047215;InterPro:IPR008183;InterPro:IPR014718;InterPro:IPR015443;InterPro:IPR011013;PFAM:PF01263,PARKENT|GeneID=OUR12_025928-T1|Product=hypothetical protein|Dbxref=InterPro:IPR047215;InterPro:IPR008183;InterPro:IPR014718;InterPro:IPR015443;InterPro:IPR011013;PFAM:PF01263
GO:0004038	PARKENT|GeneID=OUR12_015587-T1|Product=hypothetical protein|Dbxref=InterPro:IPR032466;InterPro:IPR006680;InterPro:IPR011059;PFAM:PF01979;PFAM:PF24890;InterPro:IPR050138;InterPro:IPR017593
GO:0004042	PARKENT|GeneID=OUR12_011303-T1|Product=Probable amino-acid acetyltransferase nags1, chloroplastic|Dbxref=InterPro:IPR033719;InterPro:IPR001048;InterPro:IPR016181;PFAM:PF00696;InterPro:IPR000182;InterPro:IPR036393;InterPro:IPR010167;PFAM:PF13508;PFAM:PF00583,PARKENT|GeneID=OUR12_012722-T1|Product=hypothetical protein|Dbxref=InterPro:IPR042195;InterPro:IPR002813;PFAM:PF01960;InterPro:IPR016117
GO:0004045	PARKENT|GeneID=OUR12_004544-T1|Product=hypothetical protein|Dbxref=InterPro:IPR002833;InterPro:IPR042237;InterPro:IPR023476;PFAM:PF01981,PARKENT|GeneID=OUR12_004656-T1|Product=hypothetical protein|Dbxref=InterPro:IPR002833;InterPro:IPR023476,PARKENT|GeneID=OUR12_005142-T1|Product=hypothetical protein|Dbxref=InterPro:IPR001328;PFAM:PF01195;InterPro:IPR036416,PARKENT|GeneID=OUR12_007447-T1|Product=…
GO:0004046	PARKENT|GeneID=OUR12_003475-T1|Product=hypothetical protein|Dbxref=InterPro:IPR002933;InterPro:IPR010159;PFAM:PF01546;PFAM:PF04389;InterPro:IPR001261;InterPro:IPR052083,PARKENT|GeneID=OUR12_026925-T1|Product=hypothetical protein|Dbxref=InterPro:IPR002933;InterPro:IPR010159;PFAM:PF01546;PFAM:PF04389;InterPro:IPR052083
GO:0004047	PARKENT|GeneID=OUR12_015057-T1|Product=hypothetical protein|Dbxref=PFAM:PF08669;InterPro:IPR027266;InterPro:IPR029043;InterPro:IPR006223;InterPro:IPR006222;InterPro:IPR028896;PFAM:PF01571;InterPro:IPR013977
GO:0004048	PARKENT|GeneID=OUR12_022446-T1|Product=DNA topoisomerase 2-associated protein pat1|Dbxref=InterPro:IPR000312;PFAM:PF00591;InterPro:IPR036320;InterPro:IPR017459;InterPro:IPR005940;PFAM:PF02885;InterPro:IPR035902,PARKENT|GeneID=OUR12_026225-T1|Product=DNA topoisomerase 2-associated protein pat1|Dbxref=InterPro:IPR000312;PFAM:PF00591;InterPro:IPR036320;InterPro:IPR017459;InterPro:IPR005940;PFAM:PF02…
GO:0004049	PARKENT|GeneID=OUR12_000683-T1|Product=Ankyrin repeat and SOCS box protein 2|Dbxref=InterPro:IPR050472;InterPro:IPR017926;InterPro:IPR029062;PFAM:PF00117;InterPro:IPR006221
GO:0004055	PARKENT|GeneID=OUR12_025414-T1|Product=hypothetical protein|Dbxref=InterPro:IPR018223;InterPro:IPR048268;InterPro:IPR048267;InterPro:IPR001518;InterPro:IPR014729;PFAM:PF00764;InterPro:IPR023434;InterPro:IPR024074;PFAM:PF20979
GO:0004057	PARKENT|GeneID=OUR12_019195-T1|Product=hypothetical protein|Dbxref=InterPro:IPR030700;PFAM:PF04377;InterPro:IPR016181;InterPro:IPR007472;InterPro:IPR007471;PFAM:PF04376;InterPro:IPR017137
GO:0004061	PARKENT|GeneID=OUR12_003788-T1|Product=Cyclase-like protein 2|Dbxref=PFAM:PF04199;InterPro:IPR007325;InterPro:IPR037175,PARKENT|GeneID=OUR12_003790-T1|Product=hypothetical protein|Dbxref=PFAM:PF04199;InterPro:IPR007325;InterPro:IPR037175
GO:0004066	PARKENT|GeneID=OUR12_000041-T1|Product=hypothetical protein|Dbxref=InterPro:IPR029055;InterPro:IPR001962;PFAM:PF13537;InterPro:IPR014729;InterPro:IPR051857;InterPro:IPR017932,PARKENT|GeneID=OUR12_008600-T1|Product=Asparagine synthetase|Dbxref=InterPro:IPR050795;InterPro:IPR029055;InterPro:IPR001962;PFAM:PF13537;InterPro:IPR014729;PFAM:PF13522;InterPro:IPR006426;InterPro:IPR033738;InterPro:IPR0179…
GO:0004067	PARKENT|GeneID=OUR12_024043-T1|Product=hypothetical protein|Dbxref=InterPro:IPR037464;InterPro:IPR029055;PFAM:PF01112;InterPro:IPR000246,PARKENT|GeneID=OUR12_024395-T1|Product=hypothetical protein|Dbxref=InterPro:IPR029055;PFAM:PF01112;InterPro:IPR000246
GO:0004069	PARKENT|GeneID=OUR12_002350-T1|Product=Probable aminotransferase acs10|Dbxref=InterPro:IPR050478;InterPro:IPR004839;PFAM:PF00155;InterPro:IPR015422;InterPro:IPR015424;InterPro:IPR015421,PARKENT|GeneID=OUR12_004709-T1|Product=Aspartate aminotransferase 3, chloroplastic|Dbxref=InterPro:IPR004838;InterPro:IPR004839;InterPro:IPR000796;PFAM:PF00155;InterPro:IPR015422;InterPro:IPR015424;InterPro:IPR015…
GO:0004070	PARKENT|GeneID=OUR12_029640-T1|Product=Aspartate carbamoyltransferase 3, chloroplastic|Dbxref=PFAM:PF02729;InterPro:IPR006131;InterPro:IPR006132;PFAM:PF00185;InterPro:IPR002082;InterPro:IPR006130;InterPro:IPR036901
GO:0004072	PARKENT|GeneID=OUR12_001266-T1|Product=hypothetical protein|Dbxref=InterPro:IPR042199;InterPro:IPR018042;InterPro:IPR036393;InterPro:IPR001048,PARKENT|GeneID=OUR12_001743-T1|Product=hypothetical protein|Dbxref=InterPro:IPR045865;InterPro:IPR001048;PFAM:PF00696;InterPro:IPR018042;InterPro:IPR001341;InterPro:IPR042199;InterPro:IPR041746;PFAM:PF22468;InterPro:IPR054352;InterPro:IPR036393,PARKENT|Gen…
GO:0004073	PARKENT|GeneID=OUR12_000640-T1|Product=hypothetical protein|Dbxref=PFAM:PF02774;InterPro:IPR000534;InterPro:IPR012280;InterPro:IPR005986;InterPro:IPR036291;InterPro:IPR012080;PFAM:PF01118
GO:0004076	PARKENT|GeneID=OUR12_007532-T1|Product=biotin synthase|Dbxref=InterPro:IPR002684;InterPro:IPR013785;InterPro:IPR007197,PARKENT|GeneID=OUR12_007533-T1|Product=biotin synthase|Dbxref=InterPro:IPR013785;PFAM:PF06968;InterPro:IPR002684;InterPro:IPR010722;InterPro:IPR006638;InterPro:IPR007197
GO:0004077	PARKENT|GeneID=OUR12_026960-T1|Product=hypothetical protein|Dbxref=InterPro:IPR004143;InterPro:IPR004408;PFAM:PF03099;InterPro:IPR045864
GO:0004084	PARKENT|GeneID=OUR12_011250-T1|Product=Branched-chain-amino-acid aminotransferase, mitochondrial|Dbxref=InterPro:IPR036038;InterPro:IPR018300;InterPro:IPR001544;InterPro:IPR043131;InterPro:IPR033939;InterPro:IPR043132;InterPro:IPR005786;PFAM:PF01063,PARKENT|GeneID=OUR12_027329-T1|Product=Branched-chain-amino-acid aminotransferase, mitochondrial|Dbxref=InterPro:IPR036038;InterPro:IPR018300;InterPr…
GO:0004088	PARKENT|GeneID=OUR12_005922-T1|Product=hypothetical protein|Dbxref=PFAM:PF00988;InterPro:IPR006274;InterPro:IPR017926;InterPro:IPR029062;InterPro:IPR035686;PFAM:PF00117;InterPro:IPR036480;InterPro:IPR002474,PARKENT|GeneID=OUR12_008216-T1|Product=hypothetical protein|Dbxref=InterPro:IPR016185;InterPro:IPR011761;InterPro:IPR036914;PFAM:PF25596;InterPro:IPR011607;PFAM:PF02142;InterPro:IPR006275;Inte…
GO:0004089	PARKENT|GeneID=OUR12_000905-T1|Product=hypothetical protein|Dbxref=InterPro:IPR015892;InterPro:IPR036874;InterPro:IPR045066;PFAM:PF00484;InterPro:IPR001765,PARKENT|GeneID=OUR12_004124-T1|Product=hypothetical protein|Dbxref=InterPro:IPR015892;InterPro:IPR036874;InterPro:IPR045066;PFAM:PF00484;InterPro:IPR001765,PARKENT|GeneID=OUR12_008111-T1|Product=Alpha carbonic anhydrase 7|Dbxref=InterPro:IPR02…
GO:0004096	PARKENT|GeneID=OUR12_005851-T1|Product=catalase A|Dbxref=PFAM:PF06628;InterPro:IPR024708;InterPro:IPR024711;PFAM:PF00199;InterPro:IPR002226;InterPro:IPR011614;InterPro:IPR010582;InterPro:IPR018028;InterPro:IPR020835,PARKENT|GeneID=OUR12_026670-T1|Product=catalase A|Dbxref=PFAM:PF06628;InterPro:IPR024708;InterPro:IPR024711;PFAM:PF00199;InterPro:IPR002226;InterPro:IPR011614;InterPro:IPR010582;Inter…
GO:0004097	PARKENT|GeneID=OUR12_003540-T1|Product=hypothetical protein|Dbxref=PFAM:PF12143;InterPro:IPR022739;PFAM:PF00264;PFAM:PF12142;InterPro:IPR008922;InterPro:IPR002227;InterPro:IPR050316;InterPro:IPR022740,PARKENT|GeneID=OUR12_003541-T1|Product=hypothetical protein|Dbxref=PFAM:PF12143;InterPro:IPR022740,PARKENT|GeneID=OUR12_015555-T1|Product=hypothetical protein|Dbxref=PFAM:PF12143;InterPro:IPR022739;…
GO:0004103	PARKENT|GeneID=OUR12_020292-T1|Product=hypothetical protein|Dbxref=InterPro:IPR011009;PFAM:PF01636;PFAM:PF01633,PARKENT|GeneID=OUR12_028300-T1|Product=casein kinase (serine/threonine/tyrosine protein kinase)|Dbxref=InterPro:IPR011009;PFAM:PF01636
GO:0004105	PARKENT|GeneID=OUR12_000148-T1|Product=T-complex protein 1 subunit beta|Dbxref=InterPro:IPR004821;InterPro:IPR041723;InterPro:IPR045049;PFAM:PF01467;InterPro:IPR014729,PARKENT|GeneID=OUR12_004263-T1|Product=T-complex protein 1 subunit beta|Dbxref=InterPro:IPR004821;InterPro:IPR041723;InterPro:IPR045049;PFAM:PF01467;InterPro:IPR014729
GO:0004106	PARKENT|GeneID=OUR12_004996-T1|Product=Chorismate mutase 2|Dbxref=PFAM:PF01817;InterPro:IPR002701;InterPro:IPR036263;InterPro:IPR008238;InterPro:IPR037039,PARKENT|GeneID=OUR12_022754-T1|Product=Chorismate mutase 1-like protein|Dbxref=PFAM:PF01817;InterPro:IPR002701;InterPro:IPR036263;InterPro:IPR008238;InterPro:IPR037039
GO:0004107	PARKENT|GeneID=OUR12_008161-T1|Product=Omega-ctenitoxin-Cs1a|Dbxref=InterPro:IPR000453;InterPro:IPR020541;InterPro:IPR035904;PFAM:PF01264,PARKENT|GeneID=OUR12_019784-T1|Product=Omega-ctenitoxin-Cs1a|Dbxref=InterPro:IPR035904;InterPro:IPR020541;InterPro:IPR000453;PFAM:PF01264
GO:0004108	PARKENT|GeneID=OUR12_017758-T1|Product=hypothetical protein|Dbxref=InterPro:IPR002020;InterPro:IPR016142;PFAM:PF00285;InterPro:IPR016143;InterPro:IPR036969;InterPro:IPR019810,PARKENT|GeneID=OUR12_020789-T1|Product=hypothetical protein|Dbxref=InterPro:IPR010109;InterPro:IPR002020;InterPro:IPR016142;PFAM:PF00285;InterPro:IPR036969;InterPro:IPR019810
GO:0004109	PARKENT|GeneID=OUR12_004298-T1|Product=hypothetical protein|Dbxref=InterPro:IPR018375;InterPro:IPR036406;PFAM:PF01218;InterPro:IPR001260,PARKENT|GeneID=OUR12_026379-T1|Product=hypothetical protein|Dbxref=InterPro:IPR034505;PFAM:PF04055;InterPro:IPR004559;InterPro:IPR006638;InterPro:IPR023404;InterPro:IPR007197
GO:0004112	PARKENT|GeneID=OUR12_015860-T1|Product=hypothetical protein|Dbxref=PFAM:PF13563;InterPro:IPR012386;PFAM:PF07823;InterPro:IPR009097
GO:0004113	PARKENT|GeneID=OUR12_015860-T1|Product=hypothetical protein|Dbxref=PFAM:PF13563;InterPro:IPR012386;PFAM:PF07823;InterPro:IPR009097
GO:0004124	PARKENT|GeneID=OUR12_005889-T1|Product=Bifunctional L-3-cyanoalanine synthase/cysteine synthase 1, mitochondrial|Dbxref=InterPro:IPR001926;InterPro:IPR036052;InterPro:IPR050214,PARKENT|GeneID=OUR12_007713-T1|Product=hypothetical protein|Dbxref=InterPro:IPR005856;PFAM:PF00291;InterPro:IPR036052;InterPro:IPR001926;InterPro:IPR001216;InterPro:IPR005859;InterPro:IPR050214,PARKENT|GeneID=OUR12_011921-…
GO:0004126	PARKENT|GeneID=OUR12_016712-T1|Product=chitin deacetylase cda1|Dbxref=InterPro:IPR050202;InterPro:IPR002125;PFAM:PF08211;PFAM:PF00383;InterPro:IPR016193;InterPro:IPR006263;InterPro:IPR013171
GO:0004127	PARKENT|GeneID=OUR12_017172-T1|Product=hypothetical protein|Dbxref=PFAM:PF00406;InterPro:IPR027417;PFAM:PF13207;InterPro:IPR033690;InterPro:IPR000850,PARKENT|GeneID=OUR12_023196-T1|Product=bifunctional uridylate/adenylate kinase|Dbxref=PFAM:PF00406;PFAM:PF13238;InterPro:IPR027417;PFAM:PF13207;InterPro:IPR006266;InterPro:IPR033690;InterPro:IPR000850;PFAM:PF13671,PARKENT|GeneID=OUR12_023705-T1|Prod…
GO:0004128	PARKENT|GeneID=OUR12_008909-T1|Product=NADH-cytochrome b5 reductase|Dbxref=PFAM:PF00175;InterPro:IPR017927;InterPro:IPR039261;InterPro:IPR008333;InterPro:IPR017938;InterPro:IPR001433;PFAM:PF00970;InterPro:IPR001834;InterPro:IPR001709,PARKENT|GeneID=OUR12_011947-T1|Product=NADH-cytochrome b5 reductase|Dbxref=PFAM:PF00175;InterPro:IPR017927;InterPro:IPR039261;InterPro:IPR008333;InterPro:IPR017938;I…
GO:0004134	PARKENT|GeneID=OUR12_011579-T1|Product=4-alpha-glucanotransferase dpe1, chloroplastic/amyloplastic|Dbxref=InterPro:IPR017853;PFAM:PF02446;InterPro:IPR003385,PARKENT|GeneID=OUR12_012443-T1|Product=4-alpha-glucanotransferase dpe2|Dbxref=InterPro:IPR017853;InterPro:IPR034840;InterPro:IPR002044;InterPro:IPR013784;InterPro:IPR013783;InterPro:IPR003385;PFAM:PF00686
GO:0004140	PARKENT|GeneID=OUR12_005544-T1|Product=hypothetical protein|Dbxref=InterPro:IPR014729;InterPro:IPR004821;PFAM:PF01467,PARKENT|GeneID=OUR12_009759-T1|Product=hypothetical protein|Dbxref=InterPro:IPR027417;InterPro:IPR001977,PARKENT|GeneID=OUR12_009777-T1|Product=hypothetical protein|Dbxref=InterPro:IPR027417;InterPro:IPR001977
GO:0004141	PARKENT|GeneID=OUR12_017710-T1|Product=hypothetical protein|Dbxref=InterPro:IPR027417;InterPro:IPR005814;InterPro:IPR015422;PFAM:PF00202;InterPro:IPR015424;InterPro:IPR015421;InterPro:IPR049704
GO:0004142	PARKENT|GeneID=OUR12_014388-T1|Product=resistance to o-dinitrobenzene|Dbxref=PFAM:PF24788
GO:0004143	PARKENT|GeneID=OUR12_011735-T1|Product=hypothetical protein|Dbxref=PFAM:PF00130;InterPro:IPR037607;InterPro:IPR046349;InterPro:IPR002219,PARKENT|GeneID=OUR12_011736-T1|Product=Diacylglycerol kinase 2|Dbxref=PFAM:PF00781;InterPro:IPR016064;InterPro:IPR017438;PFAM:PF00609;InterPro:IPR000756;InterPro:IPR037607;InterPro:IPR001206,PARKENT|GeneID=OUR12_017745-T1|Product=Diacylglycerol kinase 3|Dbxref=P…
GO:0004144	PARKENT|GeneID=OUR12_003767-T1|Product=hypothetical protein|Dbxref=PFAM:PF06974;InterPro:IPR009721;InterPro:IPR004255;InterPro:IPR045034,PARKENT|GeneID=OUR12_006060-T1|Product=Diacylglycerol O-acyltransferase 2|Dbxref=PFAM:PF03982;InterPro:IPR007130,PARKENT|GeneID=OUR12_016668-T1|Product=Diacylglycerol O-acyltransferase 1|Dbxref=InterPro:IPR014371;InterPro:IPR027251,PARKENT|GeneID=OUR12_018080-T1…
GO:0004146	PARKENT|GeneID=OUR12_027793-T1|Product=hypothetical protein|Dbxref=InterPro:IPR023451;InterPro:IPR017925;InterPro:IPR045097;InterPro:IPR024072;InterPro:IPR020940;InterPro:IPR001796;InterPro:IPR000398;PFAM:PF00186;PFAM:PF00303;InterPro:IPR036926,PARKENT|GeneID=OUR12_028501-T1|Product=hypothetical protein|Dbxref=InterPro:IPR023451;InterPro:IPR045097;InterPro:IPR001796;InterPro:IPR024072;InterPro:IP…
GO:0004148	PARKENT|GeneID=OUR12_006184-T1|Product=Dihydrolipoyl dehydrogenase 2, mitochondrial|Dbxref=PFAM:PF07992;InterPro:IPR012999;PFAM:PF02852;InterPro:IPR050151;InterPro:IPR004099;PFAM:PF00070;InterPro:IPR016156;InterPro:IPR036188;InterPro:IPR023753,PARKENT|GeneID=OUR12_006292-T1|Product=hypothetical protein|Dbxref=PFAM:PF07992;InterPro:IPR012999;PFAM:PF02852;InterPro:IPR050151;InterPro:IPR004099;PFAM:…
GO:0004149	PARKENT|GeneID=OUR12_015051-T1|Product=hypothetical protein|Dbxref=InterPro:IPR011053;InterPro:IPR003016;PFAM:PF00364;InterPro:IPR001078;InterPro:IPR000089;InterPro:IPR023213;InterPro:IPR050537,PARKENT|GeneID=OUR12_015052-T1|Product=hypothetical protein|Dbxref=InterPro:IPR023213;InterPro:IPR050537;InterPro:IPR001078;PFAM:PF00198,PARKENT|GeneID=OUR12_029612-T1|Product=hypothetical protein|Dbxref=I…
GO:0004150	PARKENT|GeneID=OUR12_010294-T1|Product=hypothetical protein|Dbxref=PFAM:PF02152;InterPro:IPR043133;InterPro:IPR006157;InterPro:IPR006156
GO:0004151	PARKENT|GeneID=OUR12_018081-T1|Product=Dihydroorotate dehydrogenase (fumarate)|Dbxref=InterPro:IPR004721;InterPro:IPR032466;InterPro:IPR006680;PFAM:PF01979;InterPro:IPR002195
GO:0004152	PARKENT|GeneID=OUR12_016382-T1|Product=hypothetical protein|Dbxref=InterPro:IPR005720;InterPro:IPR013785;InterPro:IPR005719;InterPro:IPR001295;InterPro:IPR050074
GO:0004156	PARKENT|GeneID=OUR12_000028-T1|Product=hypothetical protein|Dbxref=InterPro:IPR035907;PFAM:PF00809;InterPro:IPR000489;InterPro:IPR006390;InterPro:IPR011005;PFAM:PF01288;InterPro:IPR045031;InterPro:IPR000550
GO:0004157	PARKENT|GeneID=OUR12_009012-T1|Product=dihydropyrimidinase|Dbxref=InterPro:IPR032466;InterPro:IPR011778;InterPro:IPR011059;InterPro:IPR006680;InterPro:IPR050378;PFAM:PF01979
GO:0004160	PARKENT|GeneID=OUR12_007133-T1|Product=hypothetical protein|Dbxref=InterPro:IPR020558;InterPro:IPR000581;InterPro:IPR050165;InterPro:IPR004404;InterPro:IPR037237;PFAM:PF00920;PFAM:PF24877;InterPro:IPR042096
GO:0004161	PARKENT|GeneID=OUR12_029809-T1|Product=glycerol channel|Dbxref=InterPro:IPR033749;InterPro:IPR008949;PFAM:PF00348;InterPro:IPR039702;InterPro:IPR000092
GO:0004163	PARKENT|GeneID=OUR12_020070-T1|Product=Diphosphomevalonate decarboxylase mvd2, peroxisomal|Dbxref=PFAM:PF18376;PFAM:PF22700;InterPro:IPR014721;InterPro:IPR036554;InterPro:IPR005935;InterPro:IPR053859;InterPro:IPR020568;InterPro:IPR041431;PFAM:PF00288;InterPro:IPR029765
GO:0004164	PARKENT|GeneID=OUR12_027913-T1|Product=hypothetical protein|Dbxref=InterPro:IPR004551;PFAM:PF00590;InterPro:IPR000878;InterPro:IPR035996;InterPro:IPR014776;InterPro:IPR014777
GO:0004165	PARKENT|GeneID=OUR12_006844-T1|Product=hypothetical protein|Dbxref=InterPro:IPR001753;InterPro:IPR029045,PARKENT|GeneID=OUR12_006845-T1|Product=Enoyl-CoA delta isomerase 2, mitochondrial|Dbxref=InterPro:IPR001753;PFAM:PF00378;InterPro:IPR029045;PFAM:PF16113
GO:0004168	PARKENT|GeneID=OUR12_009132-T1|Product=hypothetical protein|Dbxref=InterPro:IPR032974
GO:0004170	PARKENT|GeneID=OUR12_009002-T1|Product=hypothetical protein|Dbxref=InterPro:IPR036157;InterPro:IPR029054;InterPro:IPR008181;PFAM:PF00692;InterPro:IPR033704
GO:0004174	PARKENT|GeneID=OUR12_007618-T1|Product=hypothetical protein|Dbxref=InterPro:IPR040156;PFAM:PF05187;InterPro:IPR049398;InterPro:IPR007859;InterPro:IPR029058;InterPro:IPR036188;InterPro:IPR041127,PARKENT|GeneID=OUR12_008814-T1|Product=hypothetical protein|Dbxref=PFAM:PF07992;InterPro:IPR036188;InterPro:IPR023753;PFAM:PF00070,PARKENT|GeneID=OUR12_020123-T1|Product=hypothetical protein|Dbxref=PFAM:PF…
GO:0004175	PARKENT|GeneID=OUR12_007048-T1|Product=Carboxyl-terminal-processing peptidase 2, chloroplastic|Dbxref=InterPro:IPR054620;PFAM:PF00595;InterPro:IPR029045;InterPro:IPR001478;InterPro:IPR041489;InterPro:IPR036034;InterPro:IPR005151;PFAM:PF17820,PARKENT|GeneID=OUR12_011922-T1|Product=hypothetical protein|Dbxref=InterPro:IPR006639;InterPro:IPR042524;InterPro:IPR001108;PFAM:PF01080,PARKENT|GeneID=OUR12…
GO:0004176	PARKENT|GeneID=OUR12_000219-T1|Product=ATP-dependent Clp protease proteolytic subunit 2, mitochondrial|Dbxref=InterPro:IPR023562;InterPro:IPR029045;InterPro:IPR033135;InterPro:IPR001907;PFAM:PF00574;InterPro:IPR018215,PARKENT|GeneID=OUR12_002368-T1|Product=ATP-dependent Clp protease proteolytic subunit-related protein 2, chloroplastic|Dbxref=InterPro:IPR023562;PFAM:PF00574;InterPro:IPR001907;Inte…
GO:0004177	PARKENT|GeneID=OUR12_003995-T1|Product=hypothetical protein|Dbxref=InterPro:IPR000073;PFAM:PF12697;InterPro:IPR002410;PFAM:PF00561;InterPro:IPR005944;InterPro:IPR029058,PARKENT|GeneID=OUR12_020063-T1|Product=hypothetical protein|Dbxref=InterPro:IPR023358;InterPro:IPR001948,PARKENT|GeneID=OUR12_020914-T1|Product=aminopeptidase|Dbxref=InterPro:IPR001714;InterPro:IPR007865;InterPro:IPR036005;PFAM:PF…
GO:0004180	PARKENT|GeneID=OUR12_016782-T1|Product=Lysosome-associated membrane glycoprotein 1|Dbxref=PFAM:PF02225;PFAM:PF04253;InterPro:IPR003137;InterPro:IPR007365;InterPro:IPR046450;InterPro:IPR036757;PFAM:PF04389;InterPro:IPR039373;InterPro:IPR007484,PARKENT|GeneID=OUR12_017406-T1|Product=hypothetical protein|Dbxref=InterPro:IPR039373;InterPro:IPR046450
GO:0004181	PARKENT|GeneID=OUR12_026675-T1|Product=hypothetical protein|Dbxref=InterPro:IPR034269;InterPro:IPR000834;PFAM:PF00246,PARKENT|GeneID=OUR12_028311-T1|Product=suppressor of los1-1|Dbxref=InterPro:IPR050753;InterPro:IPR000834
GO:0004185	PARKENT|GeneID=OUR12_000211-T1|Product=Serine carboxypeptidase-like 35|Dbxref=InterPro:IPR018202;InterPro:IPR001563;PFAM:PF00450;InterPro:IPR029058;InterPro:IPR033124,PARKENT|GeneID=OUR12_000541-T1|Product=hypothetical protein|Dbxref=InterPro:IPR018202;InterPro:IPR001563;PFAM:PF00450;InterPro:IPR029058;InterPro:IPR033124,PARKENT|GeneID=OUR12_000542-T1|Product=hypothetical protein|Dbxref=InterPro:…
GO:0004190	PARKENT|GeneID=OUR12_000311-T1|Product=hypothetical protein|Dbxref=PFAM:PF14541;InterPro:IPR033121;PFAM:PF14543;InterPro:IPR032799;InterPro:IPR032861;InterPro:IPR051708;InterPro:IPR021109;InterPro:IPR034161;PFAM:PF00026;InterPro:IPR001461,PARKENT|GeneID=OUR12_000339-T1|Product=hypothetical protein|Dbxref=PFAM:PF14541;InterPro:IPR001461;InterPro:IPR033121;PFAM:PF14543;InterPro:IPR032861;InterPro:I…
GO:0004197	PARKENT|GeneID=OUR12_000762-T1|Product=hypothetical protein|Dbxref=InterPro:IPR000169;InterPro:IPR025660;InterPro:IPR039417;InterPro:IPR000668;PFAM:PF00112;PFAM:PF08246;InterPro:IPR038765;InterPro:IPR025661;InterPro:IPR013128;InterPro:IPR013201,PARKENT|GeneID=OUR12_001325-T1|Product=hypothetical protein|Dbxref=InterPro:IPR005314;InterPro:IPR030397,PARKENT|GeneID=OUR12_002409-T1|Product=hypothetic…
GO:0004198	PARKENT|GeneID=OUR12_007855-T1|Product=Calpain-type cysteine protease dek1|Dbxref=PFAM:PF00648;InterPro:IPR022684;InterPro:IPR000169;PFAM:PF01067;InterPro:IPR022682;InterPro:IPR050420;InterPro:IPR033883;InterPro:IPR036213;InterPro:IPR038765;InterPro:IPR022683;InterPro:IPR001300;InterPro:IPR013320
GO:0004222	PARKENT|GeneID=OUR12_000085-T1|Product=hypothetical protein|Dbxref=InterPro:IPR050361;InterPro:IPR007863;InterPro:IPR011765;InterPro:IPR001431;PFAM:PF05193;InterPro:IPR011249;PFAM:PF00675,PARKENT|GeneID=OUR12_001007-T1|Product=hypothetical protein|Dbxref=InterPro:IPR006026;InterPro:IPR036365;InterPro:IPR001818;PFAM:PF01471;PFAM:PF00413;InterPro:IPR033739;InterPro:IPR002477;InterPro:IPR021190;Inte…
GO:0004252	PARKENT|GeneID=OUR12_000219-T1|Product=ATP-dependent Clp protease proteolytic subunit 2, mitochondrial|Dbxref=InterPro:IPR023562;InterPro:IPR029045;InterPro:IPR033135;InterPro:IPR001907;PFAM:PF00574;InterPro:IPR018215,PARKENT|GeneID=OUR12_000891-T1|Product=hypothetical protein|Dbxref=InterPro:IPR036852;InterPro:IPR045051,PARKENT|GeneID=OUR12_001276-T1|Product=hypothetical protein|Dbxref=PFAM:PF02…
GO:0004298	PARKENT|GeneID=OUR12_000772-T1|Product=Bifunctional protein GlmU|Dbxref=InterPro:IPR000243;InterPro:IPR016050;InterPro:IPR029055;InterPro:IPR001353;InterPro:IPR023333;PFAM:PF00227,PARKENT|GeneID=OUR12_001551-T1|Product=hypothetical protein|Dbxref=InterPro:IPR000243;InterPro:IPR016050;InterPro:IPR029055;InterPro:IPR001353;InterPro:IPR023333;PFAM:PF00227,PARKENT|GeneID=OUR12_004609-T1|Product=prote…
GO:0004300	PARKENT|GeneID=OUR12_026720-T1|Product=hypothetical protein|Dbxref=InterPro:IPR002539;InterPro:IPR029069;PFAM:PF01575;InterPro:IPR054357
GO:0004301	PARKENT|GeneID=OUR12_010738-T1|Product=hypothetical protein|Dbxref=InterPro:IPR000073;InterPro:IPR051340;InterPro:IPR029058,PARKENT|GeneID=OUR12_010739-T1|Product=hypothetical protein|Dbxref=InterPro:IPR051340;InterPro:IPR029058
GO:0004305	PARKENT|GeneID=OUR12_017006-T1|Product=hypothetical protein|Dbxref=InterPro:IPR011009;PFAM:PF01636;PFAM:PF01633,PARKENT|GeneID=OUR12_020292-T1|Product=hypothetical protein|Dbxref=InterPro:IPR011009;PFAM:PF01636;PFAM:PF01633,PARKENT|GeneID=OUR12_028300-T1|Product=casein kinase (serine/threonine/tyrosine protein kinase)|Dbxref=InterPro:IPR011009;PFAM:PF01636
GO:0004306	PARKENT|GeneID=OUR12_017469-T1|Product=Ethanolamine-phosphate cytidylyltransferase|Dbxref=InterPro:IPR004821;InterPro:IPR041723;PFAM:PF01467;InterPro:IPR014729;InterPro:IPR044608
GO:0004309	PARKENT|GeneID=OUR12_026303-T1|Product=hypothetical protein|Dbxref=
GO:0004310	PARKENT|GeneID=OUR12_003158-T1|Product=squalene synthetase-like protein|Dbxref=InterPro:IPR002060;InterPro:IPR033904;PFAM:PF00494;InterPro:IPR008949;InterPro:IPR019845;InterPro:IPR006449;InterPro:IPR044844,PARKENT|GeneID=OUR12_005204-T1|Product=Syntaxin-like protein psy1|Dbxref=InterPro:IPR002060;InterPro:IPR033904;PFAM:PF00494;InterPro:IPR008949;InterPro:IPR019845;InterPro:IPR044843,PARKENT|Gene…
GO:0004311	PARKENT|GeneID=OUR12_005204-T1|Product=Syntaxin-like protein psy1|Dbxref=InterPro:IPR002060;InterPro:IPR033904;PFAM:PF00494;InterPro:IPR008949;InterPro:IPR019845;InterPro:IPR044843,PARKENT|GeneID=OUR12_005446-T1|Product=Geranylgeranyl pyrophosphate synthase|Dbxref=InterPro:IPR033749;InterPro:IPR053378;InterPro:IPR008949;PFAM:PF00348;InterPro:IPR000092,PARKENT|GeneID=OUR12_006376-T1|Product=Hetero…
GO:0004314	PARKENT|GeneID=OUR12_008670-T1|Product=hypothetical protein|Dbxref=InterPro:IPR001227;InterPro:IPR016036;InterPro:IPR016035;InterPro:IPR014043;PFAM:PF00698;InterPro:IPR052760;InterPro:IPR004410
GO:0004315	PARKENT|GeneID=OUR12_002014-T1|Product=3-oxoacyl-[acyl-carrier-protein] synthase I, chloroplastic|Dbxref=InterPro:IPR000794;PFAM:PF00109;InterPro:IPR014030;InterPro:IPR020841;InterPro:IPR014031;InterPro:IPR016039;InterPro:IPR018201;PFAM:PF02801,PARKENT|GeneID=OUR12_002426-T1|Product=Beta-ketoacyl-[acyl-carrier-protein] synthase III A, chloroplastic|Dbxref=InterPro:IPR013751;PFAM:PF08541;InterPro:…
GO:0004316	PARKENT|GeneID=OUR12_025433-T1|Product=hypothetical protein|Dbxref=PFAM:PF13561;InterPro:IPR001487;InterPro:IPR020904;PFAM:PF00439;InterPro:IPR027353;PFAM:PF08659;InterPro:IPR036291;InterPro:IPR037377;InterPro:IPR002347;PFAM:PF00106;InterPro:IPR036427;InterPro:IPR011284;PFAM:PF17035;InterPro:IPR038336;InterPro:IPR052442
GO:0004318	PARKENT|GeneID=OUR12_007954-T1|Product=Enoyl-[acyl-carrier-protein] reductase [NADH], chloroplastic|Dbxref=PFAM:PF13561;InterPro:IPR014358;InterPro:IPR002347;InterPro:IPR036291,PARKENT|GeneID=OUR12_013438-T1|Product=Enoyl-[acyl-carrier-protein] reductase [NADH], chloroplastic|Dbxref=PFAM:PF13561;InterPro:IPR014358;InterPro:IPR036291;InterPro:IPR002347;PFAM:PF00106
GO:0004322	PARKENT|GeneID=OUR12_018421-T1|Product=hypothetical protein|Dbxref=PFAM:PF01491;InterPro:IPR036524;InterPro:IPR002908;InterPro:IPR020895
GO:0004325	PARKENT|GeneID=OUR12_004374-T1|Product=hypothetical protein|Dbxref=InterPro:IPR019772;InterPro:IPR001015;InterPro:IPR033659;PFAM:PF00762;InterPro:IPR033644,PARKENT|GeneID=OUR12_011776-T1|Product=hypothetical protein|Dbxref=InterPro:IPR019772;InterPro:IPR001015;InterPro:IPR033659;PFAM:PF00762;InterPro:IPR033644
GO:0004326	PARKENT|GeneID=OUR12_013400-T1|Product=hypothetical protein|Dbxref=InterPro:IPR001645;InterPro:IPR020848;PFAM:PF03372;InterPro:IPR018109;InterPro:IPR004808;InterPro:IPR036565;InterPro:IPR003034;InterPro:IPR005135;InterPro:IPR036691,PARKENT|GeneID=OUR12_019624-T1|Product=Folylpolyglutamate synthase|Dbxref=InterPro:IPR001645;InterPro:IPR036615;InterPro:IPR036565;InterPro:IPR018109;InterPro:IPR02360…
GO:0004329	PARKENT|GeneID=OUR12_007928-T1|Product=hypothetical protein|Dbxref=PFAM:PF01268;InterPro:IPR027417;InterPro:IPR020628;InterPro:IPR000559
GO:0004331	PARKENT|GeneID=OUR12_008611-T1|Product=hypothetical protein|Dbxref=InterPro:IPR013784;PFAM:PF01591;InterPro:IPR027417;InterPro:IPR029033;InterPro:IPR013078;InterPro:IPR001345;InterPro:IPR003094;PFAM:PF00300;InterPro:IPR002044;InterPro:IPR013079;InterPro:IPR013783
GO:0004332	PARKENT|GeneID=OUR12_000464-T1|Product=Fructose-bisphosphate aldolase 3, chloroplastic|Dbxref=InterPro:IPR000741;InterPro:IPR029768;PFAM:PF00274;InterPro:IPR013785,PARKENT|GeneID=OUR12_003174-T1|Product=Fructose-bisphosphate aldolase 1|Dbxref=InterPro:IPR000741;InterPro:IPR029768;PFAM:PF00274;InterPro:IPR013785,PARKENT|GeneID=OUR12_005667-T1|Product=Fructose-bisphosphate aldolase 2, chloroplastic…
GO:0004333	PARKENT|GeneID=OUR12_009867-T1|Product=fumarase fum1|Dbxref=InterPro:IPR008948;PFAM:PF00206;InterPro:IPR022761;PFAM:PF10415;InterPro:IPR000362;InterPro:IPR024083;InterPro:IPR018951;InterPro:IPR020557;InterPro:IPR005677,PARKENT|GeneID=OUR12_021007-T1|Product=fumarase fum1|Dbxref=InterPro:IPR008948;InterPro:IPR022761;PFAM:PF10415;InterPro:IPR000362;InterPro:IPR024083;InterPro:IPR018951;InterPro:IPR…
GO:0004334	PARKENT|GeneID=OUR12_015178-T1|Product=hypothetical protein|Dbxref=PFAM:PF01557;InterPro:IPR005959;PFAM:PF09298;InterPro:IPR015377;InterPro:IPR011234;InterPro:IPR036663;InterPro:IPR036462
GO:0004335	PARKENT|GeneID=OUR12_004607-T1|Product=D-arabinose 1-dehydrogenase (NAD(P)(+))|Dbxref=InterPro:IPR036554;InterPro:IPR014721;InterPro:IPR006206;InterPro:IPR020568;PFAM:PF10509;InterPro:IPR019539;InterPro:IPR006204;PFAM:PF00288,PARKENT|GeneID=OUR12_006239-T1|Product=galactokinase|Dbxref=InterPro:IPR000705;InterPro:IPR014721;InterPro:IPR036554;InterPro:IPR006206;InterPro:IPR020568;PFAM:PF10509;Inter…
GO:0004337	PARKENT|GeneID=OUR12_029809-T1|Product=glycerol channel|Dbxref=InterPro:IPR033749;InterPro:IPR008949;PFAM:PF00348;InterPro:IPR039702;InterPro:IPR000092
GO:0004340	PARKENT|GeneID=OUR12_014073-T1|Product=Hexokinase isoenzyme 2|Dbxref=InterPro:IPR022673;InterPro:IPR019807;InterPro:IPR022672;InterPro:IPR043129;PFAM:PF00349;PFAM:PF03727;InterPro:IPR001312,PARKENT|GeneID=OUR12_016789-T1|Product=hexokinase A|Dbxref=InterPro:IPR022673;InterPro:IPR019807;InterPro:IPR022672;InterPro:IPR043129;PFAM:PF00349;PFAM:PF03727;InterPro:IPR001312,PARKENT|GeneID=OUR12_027926-T…
GO:0004343	PARKENT|GeneID=OUR12_013101-T1|Product=Glucosamine-phosphate N-acetyltransferase-like protein|Dbxref=InterPro:IPR016181;InterPro:IPR000182;PFAM:PF13673;InterPro:IPR039143;PFAM:PF13508;PFAM:PF00583,PARKENT|GeneID=OUR12_019167-T1|Product=hypothetical protein|Dbxref=InterPro:IPR016181;InterPro:IPR000182;InterPro:IPR039143;PFAM:PF13508;PFAM:PF00583
GO:0004345	PARKENT|GeneID=OUR12_001678-T1|Product=Glucose-6-phosphate 1-dehydrogenase|Dbxref=InterPro:IPR022675;PFAM:PF02781;InterPro:IPR019796;InterPro:IPR001282;InterPro:IPR036291;InterPro:IPR022674;PFAM:PF00479,PARKENT|GeneID=OUR12_018507-T1|Product=Glucose-6-phosphate 1-dehydrogenase 1, chloroplastic|Dbxref=InterPro:IPR022675;PFAM:PF02781;InterPro:IPR019796;InterPro:IPR001282;InterPro:IPR036291;InterPro…
GO:0004347	PARKENT|GeneID=OUR12_009003-T1|Product=hypothetical protein|Dbxref=InterPro:IPR046348;InterPro:IPR001672,PARKENT|GeneID=OUR12_027191-T1|Product=glucose-6-phosphate isomerase|Dbxref=InterPro:IPR001672;InterPro:IPR018189;PFAM:PF00342;InterPro:IPR046348;InterPro:IPR035476;InterPro:IPR035482,PARKENT|GeneID=OUR12_027730-T1|Product=Glucose-6-phosphate isomerase, cytosolic 1|Dbxref=InterPro:IPR001672;In…
GO:0004348	PARKENT|GeneID=OUR12_019055-T1|Product=hypothetical protein|Dbxref=PFAM:PF12215;PFAM:PF04685;InterPro:IPR008928;InterPro:IPR012341;InterPro:IPR052566;InterPro:IPR006775;InterPro:IPR014551;InterPro:IPR024462,PARKENT|GeneID=OUR12_028824-T1|Product=hypothetical protein|Dbxref=PFAM:PF12215;PFAM:PF04685;InterPro:IPR008928;InterPro:IPR012341;InterPro:IPR052566;InterPro:IPR006775;InterPro:IPR014551;Inte…
GO:0004349	PARKENT|GeneID=OUR12_012840-T1|Product=Delta-1-pyrroline-5-carboxylate synthase|Dbxref=PFAM:PF00171;InterPro:IPR001048;InterPro:IPR016162;PFAM:PF00696;InterPro:IPR001057;InterPro:IPR015590;InterPro:IPR005766;InterPro:IPR020593;InterPro:IPR016163;InterPro:IPR019797;InterPro:IPR000965;InterPro:IPR036393;InterPro:IPR016161
GO:0004350	PARKENT|GeneID=OUR12_012840-T1|Product=Delta-1-pyrroline-5-carboxylate synthase|Dbxref=PFAM:PF00171;InterPro:IPR001048;InterPro:IPR016162;PFAM:PF00696;InterPro:IPR001057;InterPro:IPR015590;InterPro:IPR005766;InterPro:IPR020593;InterPro:IPR016163;InterPro:IPR019797;InterPro:IPR000965;InterPro:IPR036393;InterPro:IPR016161,PARKENT|GeneID=OUR12_019620-T1|Product=Delta-1-pyrroline-5-carboxylate syntha…
GO:0004351	PARKENT|GeneID=OUR12_000724-T1|Product=glutamate decarboxylase gad1|Dbxref=InterPro:IPR010107;InterPro:IPR015424;PFAM:PF00282;InterPro:IPR015421;InterPro:IPR002129,PARKENT|GeneID=OUR12_000725-T1|Product=hypothetical protein|Dbxref=InterPro:IPR010107;InterPro:IPR015424;PFAM:PF00282;InterPro:IPR015421;InterPro:IPR002129,PARKENT|GeneID=OUR12_005197-T1|Product=glutamate decarboxylase gad1|Dbxref=Inte…
GO:0004352	PARKENT|GeneID=OUR12_002572-T1|Product=hypothetical protein|Dbxref=InterPro:IPR046346;PFAM:PF02812;InterPro:IPR006096;InterPro:IPR006095;InterPro:IPR006097,PARKENT|GeneID=OUR12_013548-T1|Product=glutamate dehydrogenase (NADP(+)) gdh1|Dbxref=PFAM:PF00208;InterPro:IPR033922;InterPro:IPR046346;PFAM:PF02812;InterPro:IPR033524;InterPro:IPR006096;InterPro:IPR036291;InterPro:IPR006095;InterPro:IPR006097…
GO:0004354	PARKENT|GeneID=OUR12_013993-T1|Product=hypothetical protein|Dbxref=PFAM:PF00208;InterPro:IPR046346;PFAM:PF02812;InterPro:IPR006096;InterPro:IPR036291;InterPro:IPR006095;PFAM:PF25431;InterPro:IPR050724;InterPro:IPR006097
GO:0004356	PARKENT|GeneID=OUR12_000235-T1|Product=hypothetical protein|Dbxref=InterPro:IPR027302;InterPro:IPR036651;InterPro:IPR027303;InterPro:IPR050292;InterPro:IPR008146;InterPro:IPR014746;InterPro:IPR008147,PARKENT|GeneID=OUR12_006527-T1|Product=gamma-glutamylcysteine synthetase|Dbxref=InterPro:IPR036651;InterPro:IPR027303;PFAM:PF00120;InterPro:IPR050292;InterPro:IPR008146;InterPro:IPR014746,PARKENT|Gen…
GO:0004357	PARKENT|GeneID=OUR12_002185-T1|Product=glutamate--cysteine ligase|Dbxref=InterPro:IPR006336;InterPro:IPR011556;PFAM:PF04107;InterPro:IPR014746;InterPro:IPR035434
GO:0004358	PARKENT|GeneID=OUR12_012722-T1|Product=hypothetical protein|Dbxref=InterPro:IPR042195;InterPro:IPR002813;PFAM:PF01960;InterPro:IPR016117
GO:0004359	PARKENT|GeneID=OUR12_002038-T1|Product=hypothetical protein|Dbxref=InterPro:IPR003694;PFAM:PF00795;PFAM:PF02540;InterPro:IPR022310;InterPro:IPR014729;InterPro:IPR014445;InterPro:IPR036526;InterPro:IPR003010,PARKENT|GeneID=OUR12_008169-T1|Product=Pyridoxal biosynthesis protein pdx2|Dbxref=InterPro:IPR002161;PFAM:PF01174;InterPro:IPR021196;InterPro:IPR029062
GO:0004362	PARKENT|GeneID=OUR12_007136-T1|Product=hypothetical protein|Dbxref=PFAM:PF02852;InterPro:IPR004099;InterPro:IPR016156;InterPro:IPR046952;InterPro:IPR036188;InterPro:IPR023753,PARKENT|GeneID=OUR12_009456-T1|Product=hypothetical protein|Dbxref=PFAM:PF07992;InterPro:IPR012999;PFAM:PF02852;InterPro:IPR004099;PFAM:PF00070;InterPro:IPR016156;InterPro:IPR046952;InterPro:IPR006324;InterPro:IPR036188;PFAM…
GO:0004363	PARKENT|GeneID=OUR12_021175-T1|Product=Glutathione synthetase|Dbxref=InterPro:IPR016185;InterPro:IPR014709;InterPro:IPR004887;InterPro:IPR005615;PFAM:PF03199;InterPro:IPR014042;PFAM:PF03917;InterPro:IPR014049;InterPro:IPR037013
GO:0004364	PARKENT|GeneID=OUR12_000199-T1|Product=hypothetical protein|Dbxref=PFAM:PF00043;PFAM:PF13409;InterPro:IPR004045;InterPro:IPR016639;PFAM:PF14497;InterPro:IPR047047;InterPro:IPR036282;PFAM:PF13410;InterPro:IPR010987,PARKENT|GeneID=OUR12_000200-T1|Product=hypothetical protein|Dbxref=PFAM:PF00043;PFAM:PF13409;InterPro:IPR004045;InterPro:IPR016639;PFAM:PF14497;InterPro:IPR047047;InterPro:IPR036282;PFA…
GO:0004365	PARKENT|GeneID=OUR12_001502-T1|Product=Glyceraldehyde-3-phosphate dehydrogenase 2, cytosolic|Dbxref=PFAM:PF00044;InterPro:IPR020828;InterPro:IPR020829;InterPro:IPR036291;InterPro:IPR020831;InterPro:IPR006424;PFAM:PF02800;InterPro:IPR020830,PARKENT|GeneID=OUR12_012045-T1|Product=hypothetical protein|Dbxref=InterPro:IPR020831;InterPro:IPR020829,PARKENT|GeneID=OUR12_019095-T1|Product=hypothetical pr…
GO:0004366	PARKENT|GeneID=OUR12_002823-T1|Product=Glycerol-3-phosphate dehydrogenase [NAD(+)]|Dbxref=InterPro:IPR016222;InterPro:IPR023083;PFAM:PF14829;PFAM:PF01553;InterPro:IPR002123;InterPro:IPR038114,PARKENT|GeneID=OUR12_003398-T1|Product=Glycerol-3-phosphate acyltransferase 9|Dbxref=InterPro:IPR045252;PFAM:PF01553;InterPro:IPR002123
GO:0004367	PARKENT|GeneID=OUR12_013724-T1|Product=Glycerol-3-phosphate dehydrogenase [NAD(+)] gpdhc1, cytosolic|Dbxref=PFAM:PF01210;InterPro:IPR006109;InterPro:IPR011128;InterPro:IPR013328;InterPro:IPR036291;PFAM:PF07479;InterPro:IPR008927;InterPro:IPR006168,PARKENT|GeneID=OUR12_019361-T1|Product=Threonine aldolase|Dbxref=PFAM:PF01210;InterPro:IPR011128;InterPro:IPR006109;PFAM:PF02558;InterPro:IPR013328;Int…
GO:0004368	PARKENT|GeneID=OUR12_019854-T1|Product=Glycerol-3-phosphate dehydrogenase sdp6, mitochondrial|Dbxref=InterPro:IPR031656;InterPro:IPR000447;InterPro:IPR006076;PFAM:PF16901;InterPro:IPR038299;InterPro:IPR036188;PFAM:PF01266;PFAM:PF00890
GO:0004370	PARKENT|GeneID=OUR12_003152-T1|Product=D-ribulose kinase|Dbxref=InterPro:IPR043129;InterPro:IPR018485;InterPro:IPR000577;PFAM:PF02782,PARKENT|GeneID=OUR12_014428-T1|Product=hypothetical protein|Dbxref=PFAM:PF00370;PFAM:PF02782;InterPro:IPR043129;InterPro:IPR005999;InterPro:IPR000577;InterPro:IPR018484;InterPro:IPR018485;InterPro:IPR018483,PARKENT|GeneID=OUR12_014657-T1|Product=hypothetical protei…
GO:0004371	PARKENT|GeneID=OUR12_025516-T1|Product=hypothetical protein|Dbxref=InterPro:IPR004006;InterPro:IPR050861,PARKENT|GeneID=OUR12_026445-T1|Product=hypothetical protein|Dbxref=InterPro:IPR050861,PARKENT|GeneID=OUR12_026447-T1|Product=hypothetical protein|Dbxref=InterPro:IPR004006;InterPro:IPR036117;InterPro:IPR004007;InterPro:IPR050861
GO:0004372	PARKENT|GeneID=OUR12_004370-T1|Product=Serine hydroxymethyltransferase 3, chloroplastic|Dbxref=InterPro:IPR039429;InterPro:IPR019798;InterPro:IPR049943;InterPro:IPR015422;PFAM:PF00464;InterPro:IPR015424;InterPro:IPR015421;InterPro:IPR001085,PARKENT|GeneID=OUR12_007204-T1|Product=Serine hydroxymethyltransferase 4|Dbxref=InterPro:IPR039429;InterPro:IPR019798;InterPro:IPR049943;InterPro:IPR015422;PF…
GO:0004373	PARKENT|GeneID=OUR12_002113-T1|Product=hypothetical protein|Dbxref=PFAM:PF08323;InterPro:IPR013534;InterPro:IPR011835;PFAM:PF13692;PFAM:PF00534,PARKENT|GeneID=OUR12_015077-T1|Product=Soluble starch synthase 3, chloroplastic/amyloplastic|Dbxref=InterPro:IPR005085;PFAM:PF08323;InterPro:IPR001296;InterPro:IPR013783;InterPro:IPR013534;InterPro:IPR011835;PFAM:PF13439;PFAM:PF16760;PFAM:PF00534,PARKENT|…
GO:0004375	PARKENT|GeneID=OUR12_002706-T1|Product=hypothetical protein|Dbxref=InterPro:IPR015422;InterPro:IPR020581;InterPro:IPR049316,PARKENT|GeneID=OUR12_004429-T1|Product=hypothetical protein|Dbxref=PFAM:PF21478;PFAM:PF02347;InterPro:IPR020581;InterPro:IPR049315;InterPro:IPR015422;InterPro:IPR049316;InterPro:IPR015424;InterPro:IPR015421;InterPro:IPR003437,PARKENT|GeneID=OUR12_016705-T1|Product=hypothetic…
GO:0004376	PARKENT|GeneID=OUR12_007911-T1|Product=hypothetical protein|Dbxref=InterPro:IPR007315,PARKENT|GeneID=OUR12_014243-T1|Product=hypothetical protein|Dbxref=PFAM:PF06728;PFAM:PF05007;InterPro:IPR007704
GO:0004377	PARKENT|GeneID=OUR12_019248-T1|Product=asparagine-linked glycosylation protein|Dbxref=InterPro:IPR038013;InterPro:IPR001296;PFAM:PF13692;InterPro:IPR031814;PFAM:PF15924;PFAM:PF00534
GO:0004378	PARKENT|GeneID=OUR12_029104-T1|Product=hypothetical protein|Dbxref=InterPro:IPR001296;InterPro:IPR028098;PFAM:PF13692;PFAM:PF13439;InterPro:IPR027054;PFAM:PF00534
GO:0004379	PARKENT|GeneID=OUR12_013915-T1|Product=glycylpeptide N-tetradecanoyltransferase|Dbxref=PFAM:PF02799;InterPro:IPR022678;InterPro:IPR016181;InterPro:IPR000903;InterPro:IPR022677;PFAM:PF01233;InterPro:IPR022676,PARKENT|GeneID=OUR12_016665-T1|Product=glycylpeptide N-tetradecanoyltransferase|Dbxref=PFAM:PF02799;InterPro:IPR022678;InterPro:IPR016181;InterPro:IPR000903;InterPro:IPR022677;PFAM:PF01233;In…
GO:0004385	PARKENT|GeneID=OUR12_006530-T1|Product=Guanylate kinase 3, chloroplastic|Dbxref=InterPro:IPR027417;InterPro:IPR017665;InterPro:IPR008145;InterPro:IPR020590;PFAM:PF00625;InterPro:IPR008144,PARKENT|GeneID=OUR12_013637-T1|Product=Guanylate kinase 2|Dbxref=InterPro:IPR027417;InterPro:IPR017665;InterPro:IPR008145;InterPro:IPR011043;InterPro:IPR020590;PFAM:PF00625;InterPro:IPR008144
GO:0004386	PARKENT|GeneID=OUR12_000465-T1|Product=hypothetical protein|Dbxref=InterPro:IPR011545;PFAM:PF00270;InterPro:IPR027417;InterPro:IPR014001,PARKENT|GeneID=OUR12_000466-T1|Product=hypothetical protein|Dbxref=PFAM:PF21010;InterPro:IPR027417;InterPro:IPR001650;PFAM:PF04408;InterPro:IPR007502;InterPro:IPR048333;PFAM:PF00271,PARKENT|GeneID=OUR12_000467-T1|Product=hypothetical protein|Dbxref=InterPro:IPR0…
GO:0004392	PARKENT|GeneID=OUR12_017031-T1|Product=Heme oxygenase 1|Dbxref=InterPro:IPR016084;InterPro:IPR016951;InterPro:IPR002051;InterPro:IPR016053;PFAM:PF01126,PARKENT|GeneID=OUR12_027596-T1|Product=hypothetical protein|Dbxref=InterPro:IPR027417;InterPro:IPR016084;InterPro:IPR002051;InterPro:IPR016053;PFAM:PF01126;InterPro:IPR052796
GO:0004396	PARKENT|GeneID=OUR12_009098-T1|Product=hypothetical protein|Dbxref=InterPro:IPR022673;InterPro:IPR022672;InterPro:IPR043129;InterPro:IPR019807;InterPro:IPR001312,PARKENT|GeneID=OUR12_011225-T1|Product=hypothetical protein|Dbxref=InterPro:IPR022673;InterPro:IPR022672;InterPro:IPR043129;PFAM:PF00349;PFAM:PF03727;InterPro:IPR001312,PARKENT|GeneID=OUR12_014073-T1|Product=Hexokinase isoenzyme 2|Dbxref…
GO:0004399	PARKENT|GeneID=OUR12_028106-T1|Product=Histidinol dehydrogenase, chloroplastic|Dbxref=PFAM:PF00815;InterPro:IPR012131;InterPro:IPR016161
GO:0004400	PARKENT|GeneID=OUR12_028402-T1|Product=hypothetical protein|Dbxref=InterPro:IPR004839;PFAM:PF00155;InterPro:IPR015422;InterPro:IPR005861;InterPro:IPR015424;InterPro:IPR015421
GO:0004401	PARKENT|GeneID=OUR12_003506-T1|Product=Bifunctional phosphatase IMPL2, chloroplastic|Dbxref=PFAM:PF00459;InterPro:IPR011809;InterPro:IPR020583;InterPro:IPR051090;InterPro:IPR000760
GO:0004402	PARKENT|GeneID=OUR12_009471-T1|Product=hypothetical protein|Dbxref=InterPro:IPR001487;InterPro:IPR016181;InterPro:IPR000182;InterPro:IPR037800;PFAM:PF00439;InterPro:IPR047365;InterPro:IPR036427;PFAM:PF21743,PARKENT|GeneID=OUR12_009472-T1|Product=hypothetical protein|Dbxref=InterPro:IPR001487;InterPro:IPR016181;InterPro:IPR000182;InterPro:IPR037800;PFAM:PF13673;InterPro:IPR036427;PFAM:PF13508;PFAM…
GO:0004407	PARKENT|GeneID=OUR12_003494-T1|Product=Homeobox protein HD-1|Dbxref=InterPro:IPR023801;InterPro:IPR023696;PFAM:PF00850;InterPro:IPR003084;InterPro:IPR050284;InterPro:IPR037138;InterPro:IPR000286,PARKENT|GeneID=OUR12_004388-T1|Product=histone deacetylase|Dbxref=InterPro:IPR023801;InterPro:IPR044150;InterPro:IPR023696;PFAM:PF00850;InterPro:IPR050284;InterPro:IPR037138;InterPro:IPR000286,PARKENT|Gen…
GO:0004411	PARKENT|GeneID=OUR12_029180-T1|Product=hypothetical protein|Dbxref=PFAM:PF04209;PFAM:PF20510;InterPro:IPR046452;InterPro:IPR005708;InterPro:IPR014710;InterPro:IPR011051;InterPro:IPR046451
GO:0004412	PARKENT|GeneID=OUR12_008888-T1|Product=hypothetical protein|Dbxref=InterPro:IPR011147;PFAM:PF00742;InterPro:IPR019811;InterPro:IPR036291;InterPro:IPR001342,PARKENT|GeneID=OUR12_028865-T1|Product=Bifunctional aspartokinase/homoserine dehydrogenase 1, chloroplastic|Dbxref=PFAM:PF13840;InterPro:IPR005106;InterPro:IPR045865;InterPro:IPR041743;InterPro:IPR001341;InterPro:IPR042199;InterPro:IPR001048;P…
GO:0004413	PARKENT|GeneID=OUR12_017263-T1|Product=hypothetical protein|Dbxref=InterPro:IPR036554;InterPro:IPR014721;InterPro:IPR020568;InterPro:IPR006203;PFAM:PF08544;InterPro:IPR000870;InterPro:IPR013750;InterPro:IPR006204;PFAM:PF00288
GO:0004416	PARKENT|GeneID=OUR12_007628-T1|Product=hypothetical protein|Dbxref=InterPro:IPR035680;PFAM:PF00753;InterPro:IPR009033;InterPro:IPR032282;InterPro:IPR001279;InterPro:IPR001580;PFAM:PF16123;InterPro:IPR017782;InterPro:IPR036866;InterPro:IPR013320,PARKENT|GeneID=OUR12_019172-T1|Product=hypothetical protein|Dbxref=InterPro:IPR035680;PFAM:PF00753;InterPro:IPR032282;InterPro:IPR001279;InterPro:IPR01778…
GO:0004417	PARKENT|GeneID=OUR12_007091-T1|Product=hypothetical protein|Dbxref=InterPro:IPR029056;InterPro:IPR000417,PARKENT|GeneID=OUR12_007093-T1|Product=hypothetical protein|Dbxref=InterPro:IPR029056;InterPro:IPR000417
GO:0004418	PARKENT|GeneID=OUR12_005811-T1|Product=hypothetical protein|Dbxref=InterPro:IPR022419;PFAM:PF01379;InterPro:IPR036803;InterPro:IPR022418;PFAM:PF03900;InterPro:IPR022417;InterPro:IPR000860
GO:0004419	PARKENT|GeneID=OUR12_008996-T1|Product=hypothetical protein|Dbxref=PFAM:PF00682;InterPro:IPR043594;InterPro:IPR013785;InterPro:IPR000138;InterPro:IPR000891,PARKENT|GeneID=OUR12_012492-T1|Product=hypothetical protein|Dbxref=PFAM:PF00682;InterPro:IPR043594;InterPro:IPR000891;InterPro:IPR013785
GO:0004420	PARKENT|GeneID=OUR12_003482-T1|Product=3-hydroxy-3-methylglutaryl-coenzyme A (HMG-CoA) reductase isozyme|Dbxref=InterPro:IPR023282;InterPro:IPR023076;InterPro:IPR002202;InterPro:IPR023074;PFAM:PF00368;InterPro:IPR004554;InterPro:IPR009023;InterPro:IPR009029,PARKENT|GeneID=OUR12_006047-T1|Product=3-hydroxy-3-methylglutaryl coenzyme A reductase 2-A|Dbxref=InterPro:IPR023282;InterPro:IPR023076;Inter…
GO:0004421	PARKENT|GeneID=OUR12_002304-T1|Product=hypothetical protein|Dbxref=InterPro:IPR013746;InterPro:IPR010122;InterPro:IPR013528;InterPro:IPR016039;PFAM:PF08540;PFAM:PF01154,PARKENT|GeneID=OUR12_024568-T1|Product=hypothetical protein|Dbxref=InterPro:IPR013528;InterPro:IPR016039
GO:0004422	PARKENT|GeneID=OUR12_028288-T1|Product=hypothetical protein|Dbxref=InterPro:IPR029057;PFAM:PF00156;InterPro:IPR000836;InterPro:IPR050408;InterPro:IPR005904
GO:0004424	PARKENT|GeneID=OUR12_006636-T1|Product=imidazoleglycerol-phosphate dehydratase|Dbxref=InterPro:IPR000807;PFAM:PF00475;InterPro:IPR020565;InterPro:IPR020568;InterPro:IPR038494
GO:0004425	PARKENT|GeneID=OUR12_018543-T1|Product=hypothetical protein|Dbxref=InterPro:IPR013785;InterPro:IPR045186;InterPro:IPR013798;InterPro:IPR001468;InterPro:IPR011060;PFAM:PF00218
GO:0004427	PARKENT|GeneID=OUR12_001054-T1|Product=Pyrophosphate-energized vacuolar membrane proton pump 1|Dbxref=InterPro:IPR004131,PARKENT|GeneID=OUR12_002134-T1|Product=V-ATPase V0 sector subunit c''|Dbxref=PFAM:PF00719;InterPro:IPR036649;InterPro:IPR008162,PARKENT|GeneID=OUR12_004007-T1|Product=Soluble inorganic pyrophosphatase 6, chloroplastic|Dbxref=PFAM:PF00719;InterPro:IPR036649;InterPro:IPR008162,PA…
GO:0004430	PARKENT|GeneID=OUR12_003080-T1|Product=Phosphatidylinositol 4-kinase alpha 1|Dbxref=InterPro:IPR016024;InterPro:IPR015433;InterPro:IPR001263;InterPro:IPR042236,PARKENT|GeneID=OUR12_003602-T1|Product=Phosphatidylinositol 4-kinase alpha 1|Dbxref=InterPro:IPR018936;InterPro:IPR016024;InterPro:IPR000403;InterPro:IPR036940;InterPro:IPR015433;InterPro:IPR001263;PFAM:PF00613;PFAM:PF00454;InterPro:IPR042…
GO:0004435	PARKENT|GeneID=OUR12_008581-T1|Product=Phosphoinositide phospholipase C 4|Dbxref=PFAM:PF00388;InterPro:IPR035892;InterPro:IPR001192;PFAM:PF00168;InterPro:IPR000008;InterPro:IPR001711;PFAM:PF00387;InterPro:IPR011992;InterPro:IPR015359;InterPro:IPR017946;InterPro:IPR000909;PFAM:PF09279,PARKENT|GeneID=OUR12_008582-T1|Product=Phosphoinositide phospholipase C 4|Dbxref=PFAM:PF00388;InterPro:IPR035892;I…
GO:0004439	PARKENT|GeneID=OUR12_000688-T1|Product=Type IV inositol polyphosphate 5-phosphatase 9|Dbxref=InterPro:IPR045849;InterPro:IPR000300;PFAM:PF22669;InterPro:IPR036691,PARKENT|GeneID=OUR12_002661-T1|Product=hypothetical protein|Dbxref=InterPro:IPR045849;InterPro:IPR000300;InterPro:IPR036691,PARKENT|GeneID=OUR12_006674-T1|Product=Type IV inositol polyphosphate 5-phosphatase 7|Dbxref=InterPro:IPR045849;…
GO:0004445	PARKENT|GeneID=OUR12_000688-T1|Product=Type IV inositol polyphosphate 5-phosphatase 9|Dbxref=InterPro:IPR045849;InterPro:IPR000300;PFAM:PF22669;InterPro:IPR036691,PARKENT|GeneID=OUR12_002661-T1|Product=hypothetical protein|Dbxref=InterPro:IPR045849;InterPro:IPR000300;InterPro:IPR036691,PARKENT|GeneID=OUR12_006674-T1|Product=Type IV inositol polyphosphate 5-phosphatase 7|Dbxref=InterPro:IPR045849;…
GO:0004449	PARKENT|GeneID=OUR12_003390-T1|Product=isocitrate dehydrogenase (NAD(+)) idh1|Dbxref=InterPro:IPR004434;PFAM:PF00180;InterPro:IPR024084,PARKENT|GeneID=OUR12_005840-T1|Product=isocitrate dehydrogenase (NAD(+)) idh1|Dbxref=InterPro:IPR004434;PFAM:PF00180;InterPro:IPR024084,PARKENT|GeneID=OUR12_012541-T1|Product=Isocitrate dehydrogenase [NAD] catalytic subunit 5, mitochondrial|Dbxref=InterPro:IPR004…
GO:0004450	PARKENT|GeneID=OUR12_005190-T1|Product=hypothetical protein|Dbxref=PFAM:PF00180;InterPro:IPR004790;InterPro:IPR019818;InterPro:IPR024084,PARKENT|GeneID=OUR12_022444-T1|Product=hypothetical protein|Dbxref=PFAM:PF00180;InterPro:IPR004790;InterPro:IPR019818;InterPro:IPR024084,PARKENT|GeneID=OUR12_030343-T1|Product=hypothetical protein|Dbxref=PFAM:PF00180;InterPro:IPR004790;InterPro:IPR019818;InterPr…
GO:0004451	PARKENT|GeneID=OUR12_018340-T1|Product=hypothetical protein|Dbxref=InterPro:IPR015813;PFAM:PF00463;InterPro:IPR018523;InterPro:IPR040442;InterPro:IPR039556;InterPro:IPR006254
GO:0004452	PARKENT|GeneID=OUR12_005378-T1|Product=hypothetical protein|Dbxref=PFAM:PF00293;InterPro:IPR000086;InterPro:IPR011876;InterPro:IPR015797,PARKENT|GeneID=OUR12_017203-T1|Product=hypothetical protein|Dbxref=PFAM:PF00293;InterPro:IPR036322;InterPro:IPR015797;InterPro:IPR000086;PFAM:PF00400;InterPro:IPR001680;InterPro:IPR015943
GO:0004455	PARKENT|GeneID=OUR12_008696-T1|Product=hypothetical protein|Dbxref=PFAM:PF01450;InterPro:IPR000506;InterPro:IPR013023;InterPro:IPR013328;InterPro:IPR008927,PARKENT|GeneID=OUR12_015751-T1|Product=hypothetical protein|Dbxref=InterPro:IPR013023;PFAM:PF07991;InterPro:IPR013328;InterPro:IPR013116;InterPro:IPR036291;InterPro:IPR008927,PARKENT|GeneID=OUR12_017965-T1|Product=hypothetical protein|Dbxref=P…
GO:0004459	PARKENT|GeneID=OUR12_002448-T1|Product=hypothetical protein|Dbxref=InterPro:IPR022383;PFAM:PF00056;InterPro:IPR001236;InterPro:IPR015955;PFAM:PF02866;InterPro:IPR011304;InterPro:IPR036291;InterPro:IPR018177;InterPro:IPR001557,PARKENT|GeneID=OUR12_023519-T1|Product=hypothetical protein|Dbxref=InterPro:IPR022383;PFAM:PF00056;InterPro:IPR001236;InterPro:IPR015955;PFAM:PF02866;InterPro:IPR011304;Inte…
GO:0004462	PARKENT|GeneID=OUR12_004683-T1|Product=hypothetical protein|Dbxref=PFAM:PF13669;PFAM:PF00903;InterPro:IPR004360;InterPro:IPR018146;InterPro:IPR029068;InterPro:IPR037523;InterPro:IPR004361,PARKENT|GeneID=OUR12_009143-T1|Product=hypothetical protein|Dbxref=PFAM:PF13669;PFAM:PF00903;InterPro:IPR004360;InterPro:IPR018146;InterPro:IPR029068;InterPro:IPR037523;InterPro:IPR004361,PARKENT|GeneID=OUR12_01…
GO:0004467	PARKENT|GeneID=OUR12_001640-T1|Product=4-coumarate--CoA ligase-like 1|Dbxref=PFAM:PF00501;InterPro:IPR042099;InterPro:IPR000873;InterPro:IPR045851;InterPro:IPR020845;PFAM:PF13193;InterPro:IPR025110,PARKENT|GeneID=OUR12_001972-T1|Product=Long chain acyl-CoA synthetase 4|Dbxref=PFAM:PF00501;InterPro:IPR042099;InterPro:IPR000873;InterPro:IPR020845;InterPro:IPR045311,PARKENT|GeneID=OUR12_003637-T1|Pr…
GO:0004470	PARKENT|GeneID=OUR12_002840-T1|Product=NADP-dependent malic enzyme|Dbxref=InterPro:IPR012302;InterPro:IPR036291,PARKENT|GeneID=OUR12_014088-T1|Product=hypothetical protein|Dbxref=InterPro:IPR001891;InterPro:IPR015884;InterPro:IPR046346;InterPro:IPR012301;PFAM:PF03949;InterPro:IPR012302;InterPro:IPR036291;PFAM:PF00390;InterPro:IPR037062,PARKENT|GeneID=OUR12_016803-T1|Product=hypothetical protein|D…
GO:0004471	PARKENT|GeneID=OUR12_023259-T1|Product=hypothetical protein|Dbxref=InterPro:IPR046346,PARKENT|GeneID=OUR12_024056-T1|Product=hypothetical protein|Dbxref=InterPro:IPR001891;InterPro:IPR015884;InterPro:IPR046346;InterPro:IPR012301;PFAM:PF03949;InterPro:IPR012302;InterPro:IPR036291;PFAM:PF00390;InterPro:IPR037062
GO:0004473	PARKENT|GeneID=OUR12_002840-T1|Product=NADP-dependent malic enzyme|Dbxref=InterPro:IPR012302;InterPro:IPR036291,PARKENT|GeneID=OUR12_014088-T1|Product=hypothetical protein|Dbxref=InterPro:IPR001891;InterPro:IPR015884;InterPro:IPR046346;InterPro:IPR012301;PFAM:PF03949;InterPro:IPR012302;InterPro:IPR036291;PFAM:PF00390;InterPro:IPR037062,PARKENT|GeneID=OUR12_016803-T1|Product=hypothetical protein|D…
GO:0004474	PARKENT|GeneID=OUR12_025429-T1|Product=hypothetical protein|Dbxref=InterPro:IPR019830;InterPro:IPR006252;InterPro:IPR011076;PFAM:PF20659;InterPro:IPR046363;InterPro:IPR001465;InterPro:IPR048356;InterPro:IPR044856;PFAM:PF20656;PFAM:PF01274;InterPro:IPR048355
GO:0004475	PARKENT|GeneID=OUR12_019618-T1|Product=cytochrome c1|Dbxref=InterPro:IPR029044;PFAM:PF00132;InterPro:IPR005835;InterPro:IPR045233;InterPro:IPR050486;PFAM:PF00483;PFAM:PF12804;InterPro:IPR001451;PFAM:PF25087
GO:0004476	PARKENT|GeneID=OUR12_000403-T1|Product=hypothetical protein|Dbxref=InterPro:IPR016305;InterPro:IPR046458;InterPro:IPR046457;PFAM:PF20511;PFAM:PF20512;InterPro:IPR014710;InterPro:IPR011051;InterPro:IPR001250,PARKENT|GeneID=OUR12_021828-T1|Product=Mannose-6-phosphate isomerase|Dbxref=InterPro:IPR016305;InterPro:IPR046458;InterPro:IPR046456;InterPro:IPR046457;PFAM:PF01238;InterPro:IPR018050;PFAM:PF2…
GO:0004477	PARKENT|GeneID=OUR12_009780-T1|Product=Bifunctional protein FolD 2|Dbxref=InterPro:IPR046346;InterPro:IPR000672;InterPro:IPR020867;InterPro:IPR020630;InterPro:IPR036291;InterPro:IPR020631;PFAM:PF02882;PFAM:PF00763,PARKENT|GeneID=OUR12_010632-T1|Product=Bifunctional protein FolD 1, mitochondrial|Dbxref=InterPro:IPR046346;InterPro:IPR000672;InterPro:IPR020867;InterPro:IPR020630;InterPro:IPR036291;I…
GO:0004478	PARKENT|GeneID=OUR12_000849-T1|Product=hypothetical protein|Dbxref=InterPro:IPR022629;InterPro:IPR022636,PARKENT|GeneID=OUR12_006317-T1|Product=S-adenosylmethionine synthetase isoform type-2|Dbxref=InterPro:IPR022629;InterPro:IPR022628;InterPro:IPR022631;PFAM:PF00438;InterPro:IPR002133;InterPro:IPR022636;PFAM:PF02772;InterPro:IPR022630;PFAM:PF02773,PARKENT|GeneID=OUR12_007040-T1|Product=S-adenosy…
GO:0004482	PARKENT|GeneID=OUR12_029444-T1|Product=hypothetical protein|Dbxref=InterPro:IPR039753;PFAM:PF08242;PFAM:PF13649;PFAM:PF08241;InterPro:IPR029063;PFAM:PF03291;InterPro:IPR004971;PFAM:PF13847
GO:0004484	PARKENT|GeneID=OUR12_012918-T1|Product=hypothetical protein|Dbxref=InterPro:IPR029021;InterPro:IPR051029
GO:0004485	PARKENT|GeneID=OUR12_002948-T1|Product=Methylcrotonoyl-CoA carboxylase subunit alpha, mitochondrial|Dbxref=InterPro:IPR050856;InterPro:IPR005479,PARKENT|GeneID=OUR12_003749-T1|Product=hypothetical protein|Dbxref=InterPro:IPR045190;InterPro:IPR011762;InterPro:IPR029045;InterPro:IPR034733;PFAM:PF01039;InterPro:IPR011763,PARKENT|GeneID=OUR12_004126-T1|Product=hypothetical protein|Dbxref=InterPro:IPR…
GO:0004488	PARKENT|GeneID=OUR12_009780-T1|Product=Bifunctional protein FolD 2|Dbxref=InterPro:IPR046346;InterPro:IPR000672;InterPro:IPR020867;InterPro:IPR020630;InterPro:IPR036291;InterPro:IPR020631;PFAM:PF02882;PFAM:PF00763,PARKENT|GeneID=OUR12_010632-T1|Product=Bifunctional protein FolD 1, mitochondrial|Dbxref=InterPro:IPR046346;InterPro:IPR000672;InterPro:IPR020867;InterPro:IPR020630;InterPro:IPR036291;I…
GO:0004489	PARKENT|GeneID=OUR12_007797-T1|Product=hypothetical protein|Dbxref=InterPro:IPR029041;InterPro:IPR003171,PARKENT|GeneID=OUR12_022803-T1|Product=Methylenetetrahydrofolate reductase 1|Dbxref=InterPro:IPR053806;PFAM:PF21895;PFAM:PF21897,PARKENT|GeneID=OUR12_022804-T1|Product=hypothetical protein|Dbxref=InterPro:IPR029041;InterPro:IPR053806;InterPro:IPR003171
GO:0004491	PARKENT|GeneID=OUR12_004074-T1|Product=hypothetical protein|Dbxref=InterPro:IPR016163;InterPro:IPR010061;InterPro:IPR015590;InterPro:IPR016161,PARKENT|GeneID=OUR12_004076-T1|Product=Methylmalonate-semialdehyde dehydrogenase [acylating], mitochondrial|Dbxref=PFAM:PF00171;InterPro:IPR016162;InterPro:IPR015590;InterPro:IPR016163;InterPro:IPR016160;InterPro:IPR010061;InterPro:IPR016161,PARKENT|GeneID…
GO:0004496	PARKENT|GeneID=OUR12_021135-T1|Product=hypothetical protein|Dbxref=InterPro:IPR014721;InterPro:IPR036554;InterPro:IPR006205;InterPro:IPR020568;InterPro:IPR006203;PFAM:PF08544;InterPro:IPR013750;InterPro:IPR006204;PFAM:PF00288,PARKENT|GeneID=OUR12_021136-T1|Product=hypothetical protein|Dbxref=InterPro:IPR006205;InterPro:IPR014721;InterPro:IPR020568
GO:0004497	PARKENT|GeneID=OUR12_000025-T1|Product=hypothetical protein|Dbxref=InterPro:IPR017972;InterPro:IPR036396;InterPro:IPR001128;InterPro:IPR002401,PARKENT|GeneID=OUR12_000026-T1|Product=hypothetical protein|Dbxref=InterPro:IPR017972;PFAM:PF00067;InterPro:IPR0
GO:0004499	PARKENT|GeneID=OUR12_002429-T1|Product=hypothetical protein|Dbxref=InterPro:IPR050346;PFAM:PF07992;InterPro:IPR020946;PFAM:PF13450;InterPro:IPR036188;InterPro:IPR000960,PARKENT|GeneID=OUR12_002430-T1|Product=hypothetical protein|Dbxref=InterPro:IPR050346;PFAM:PF07992;InterPro:IPR020946;PFAM:PF13450;InterPro:IPR036188;PFAM:PF13738;InterPro:IPR000960,PARKENT|GeneID=OUR12_002431-T1|Product=hypotheti…
GO:0004506	PARKENT|GeneID=OUR12_003992-T1|Product=Squalene epoxidase 1|Dbxref=PFAM:PF08491;PFAM:PF01494;InterPro:IPR040125;InterPro:IPR036188;InterPro:IPR013698,PARKENT|GeneID=OUR12_003993-T1|Product=Squalene epoxidase 1|Dbxref=PFAM:PF08491;PFAM:PF01494;InterPro:IPR040125;InterPro:IPR036188;InterPro:IPR013698,PARKENT|GeneID=OUR12_011261-T1|Product=Squalene epoxidase 3|Dbxref=PFAM:PF08491;PFAM:PF01494;InterP…
GO:0004514	PARKENT|GeneID=OUR12_000523-T1|Product=Quinolinate phosphoribosyltransferase [decarboxylating] 2, mitochondrial|Dbxref=PFAM:PF01729;InterPro:IPR036068;InterPro:IPR013785;InterPro:IPR027277;InterPro:IPR002638,PARKENT|GeneID=OUR12_000524-T1|Product=Quinolinate phosphoribosyltransferase [decarboxylating] 1a|Dbxref=PFAM:PF02749;InterPro:IPR036068;InterPro:IPR013785;InterPro:IPR027277;InterPro:IPR0371…
GO:0004515	PARKENT|GeneID=OUR12_029773-T1|Product=hypothetical protein|Dbxref=InterPro:IPR004821;InterPro:IPR005248;PFAM:PF01467;InterPro:IPR051182;InterPro:IPR014729
GO:0004516	PARKENT|GeneID=OUR12_011451-T1|Product=Nicotinate phosphoribosyltransferase 2|Dbxref=InterPro:IPR006405;InterPro:IPR036068;InterPro:IPR013785;InterPro:IPR041619;InterPro:IPR040727;PFAM:PF17956;InterPro:IPR007229;PFAM:PF17767
GO:0004518	PARKENT|GeneID=OUR12_002582-T1|Product=DNA repair endonuclease uvh1|Dbxref=InterPro:IPR047520;PFAM:PF02732;InterPro:IPR010994;InterPro:IPR011335;InterPro:IPR006166,PARKENT|GeneID=OUR12_005714-T1|Product=hypothetical protein|Dbxref=InterPro:IPR020848;PFAM:PF03372;InterPro:IPR020847;InterPro:IPR010666;PFAM:PF06839;InterPro:IPR004808;InterPro:IPR005135;InterPro:IPR036691,PARKENT|GeneID=OUR12_005796-…
GO:0004519	PARKENT|GeneID=OUR12_000225-T1|Product=hypothetical protein|Dbxref=InterPro:IPR020847;InterPro:IPR013083;PFAM:PF13920;InterPro:IPR052972;InterPro:IPR001841,PARKENT|GeneID=OUR12_000396-T1|Product=Endonuclease 2|Dbxref=PFAM:PF02265;InterPro:IPR003154;InterPro:IPR008947,PARKENT|GeneID=OUR12_003710-T1|Product=Pentatricopeptide repeat-containing protein|Dbxref=PFAM:PF03161;InterPro:IPR004860;InterPro:…
GO:0004520	PARKENT|GeneID=OUR12_022522-T1|Product=hypothetical protein|Dbxref=InterPro:IPR019974;InterPro:IPR001044;InterPro:IPR006086;InterPro:IPR036279;PFAM:PF00867;InterPro:IPR029060;PFAM:PF00752;InterPro:IPR006085;InterPro:IPR008918;InterPro:IPR006084
GO:0004521	PARKENT|GeneID=OUR12_000630-T1|Product=hypothetical protein|Dbxref=InterPro:IPR050698;InterPro:IPR011108;PFAM:PF07521;InterPro:IPR036866,PARKENT|GeneID=OUR12_000631-T1|Product=hypothetical protein|Dbxref=InterPro:IPR050698;InterPro:IPR022712;InterPro:IPR036866,PARKENT|GeneID=OUR12_000632-T1|Product=Cleavage and polyadenylation specificity factor subunit 3-II|Dbxref=PFAM:PF00753;InterPro:IPR001279…
GO:0004523	PARKENT|GeneID=OUR12_003182-T1|Product=hypothetical protein|Dbxref=InterPro:IPR002156;PFAM:PF13456,PARKENT|GeneID=OUR12_008209-T1|Product=hypothetical protein|Dbxref=InterPro:IPR044066;PFAM:PF01485;InterPro:IPR002867;InterPro:IPR017907;InterPro:IPR013083;InterPro:IPR036397;PFAM:PF26200;InterPro:IPR031127;PFAM:PF13456;PFAM:PF22191;InterPro:IPR002156;InterPro:IPR012337;InterPro:IPR001841,PARKENT|Ge…
GO:0004525	PARKENT|GeneID=OUR12_004527-T1|Product=Belongs to the helicase|Dbxref=InterPro:IPR001650;PFAM:PF04851;PFAM:PF00271;PFAM:PF14622;InterPro:IPR027417;InterPro:IPR014001;InterPro:IPR036389;PFAM:PF00270;PFAM:PF03368;InterPro:IPR036085;InterPro:IPR038248;InterPro:IPR003100;InterPro:IPR011545;InterPro:IPR000999;PFAM:PF02170;InterPro:IPR005034;InterPro:IPR014720;PFAM:PF00636;PFAM:PF00035,PARKENT|GeneID=O…
GO:0004526	PARKENT|GeneID=OUR12_004285-T1|Product=hypothetical protein|Dbxref=InterPro:IPR033443;InterPro:IPR011990,PARKENT|GeneID=OUR12_004288-T1|Product=hypothetical protein|Dbxref=InterPro:IPR033443;InterPro:IPR002885;InterPro:IPR011990;PFAM:PF01535,PARKENT|GeneID=OUR12_016855-T1|Product=hypothetical protein|Dbxref=InterPro:IPR031595;PFAM:PF16953;PFAM:PF23276;InterPro:IPR033443;InterPro:IPR002885;InterPr…
GO:0004527	PARKENT|GeneID=OUR12_009414-T1|Product=hypothetical protein|Dbxref=InterPro:IPR041412;InterPro:IPR004859;InterPro:IPR017151;PFAM:PF17846;PFAM:PF03159;InterPro:IPR027073,PARKENT|GeneID=OUR12_009618-T1|Product=hypothetical protein|Dbxref=InterPro:IPR013087;InterPro:IPR013520;InterPro:IPR047021;InterPro:IPR036397;InterPro:IPR036236;InterPro:IPR012337,PARKENT|GeneID=OUR12_011407-T1|Product=hypothetic…
GO:0004534	PARKENT|GeneID=OUR12_009414-T1|Product=hypothetical protein|Dbxref=InterPro:IPR041412;InterPro:IPR004859;InterPro:IPR017151;PFAM:PF17846;PFAM:PF03159;InterPro:IPR027073,PARKENT|GeneID=OUR12_018647-T1|Product=hypothetical protein|Dbxref=InterPro:IPR003141;InterPro:IPR016195;InterPro:IPR004013;InterPro:IPR052018,PARKENT|GeneID=OUR12_018954-T1|Product=hypothetical protein|Dbxref=InterPro:IPR021718;I…
GO:0004535	PARKENT|GeneID=OUR12_003067-T1|Product=Carbon catabolite repressor protein 4 4|Dbxref=InterPro:IPR050410;PFAM:PF03372;InterPro:IPR036691;InterPro:IPR005135,PARKENT|GeneID=OUR12_004929-T1|Product=ccr4 associated factor|Dbxref=InterPro:IPR006941;InterPro:IPR036397;InterPro:IPR012337;InterPro:IPR039637,PARKENT|GeneID=OUR12_009404-T1|Product=Probable CCR4-associated factor 1 9|Dbxref=InterPro:IPR0069…
GO:0004540	PARKENT|GeneID=OUR12_002388-T1|Product=hypothetical protein|Dbxref=InterPro:IPR013087;InterPro:IPR021139;PFAM:PF01936;InterPro:IPR036236,PARKENT|GeneID=OUR12_003752-T1|Product=hypothetical protein|Dbxref=InterPro:IPR025605;InterPro:IPR041966;InterPro:IPR024768;PFAM:PF01936;PFAM:PF12872;InterPro:IPR021139,PARKENT|GeneID=OUR12_005898-T1|Product=hypothetical protein|Dbxref=InterPro:IPR025605;InterPr…
GO:0004550	PARKENT|GeneID=OUR12_001984-T1|Product=hypothetical protein|Dbxref=InterPro:IPR034907;PFAM:PF00334;InterPro:IPR001564;InterPro:IPR036850;InterPro:IPR023005,PARKENT|GeneID=OUR12_002862-T1|Product=Nucleoside diphosphate kinase III, chloroplastic/mitochondrial|Dbxref=InterPro:IPR034907;PFAM:PF00334;InterPro:IPR036850;InterPro:IPR001564,PARKENT|GeneID=OUR12_013820-T1|Product=hypothetical protein|Dbxr…
GO:0004553	PARKENT|GeneID=OUR12_000086-T1|Product=Beta-glucosidase 40|Dbxref=PFAM:PF00232;InterPro:IPR001360;InterPro:IPR033132;InterPro:IPR017853,PARKENT|GeneID=OUR12_000087-T1|Product=Beta-glucosidase 6|Dbxref=InterPro:IPR017853;InterPro:IPR001360,PARKENT|GeneID=O
GO:0004555	PARKENT|GeneID=OUR12_002043-T1|Product=Trehalase|Dbxref=PFAM:PF01204;InterPro:IPR008928;InterPro:IPR001661;PFAM:PF22422;InterPro:IPR012341;InterPro:IPR018232
GO:0004556	PARKENT|GeneID=OUR12_001086-T1|Product=Alpha-amylase A type-3|Dbxref=InterPro:IPR017853;PFAM:PF07821;PFAM:PF23166;InterPro:IPR013780;InterPro:IPR012850;InterPro:IPR006047;InterPro:IPR006046,PARKENT|GeneID=OUR12_003738-T1|Product=hypothetical protein|Dbxref=InterPro:IPR017853;InterPro:IPR016177;PFAM:PF07821;InterPro:IPR036955;InterPro:IPR013780;PFAM:PF00847;InterPro:IPR012850;InterPro:IPR006047;In…
GO:0004559	PARKENT|GeneID=OUR12_005736-T1|Product=hypothetical protein|Dbxref=InterPro:IPR000602;InterPro:IPR028995;InterPro:IPR048534;PFAM:PF09261;PFAM:PF21260;InterPro:IPR013780;PFAM:PF01074;InterPro:IPR011682;InterPro:IPR015341;PFAM:PF17677;InterPro:IPR041147;InterPro:IPR050843;InterPro:IPR011013;InterPro:IPR011330;PFAM:PF07748;InterPro:IPR037094;InterPro:IPR027291,PARKENT|GeneID=OUR12_006777-T1|Product=…
GO:0004560	PARKENT|GeneID=OUR12_003829-T1|Product=Alpha-L-fucosidase 2|Dbxref=InterPro:IPR008928;InterPro:IPR012341;PFAM:PF22124;InterPro:IPR016518;InterPro:IPR049053;PFAM:PF21307;InterPro:IPR027414;InterPro:IPR054363,PARKENT|GeneID=OUR12_009146-T1|Product=L-fucose permease Glucose/galactose transporter|Dbxref=InterPro:IPR000933;InterPro:IPR008979;InterPro:IPR017853;PFAM:PF01120,PARKENT|GeneID=OUR12_024654-…
GO:0004563	PARKENT|GeneID=OUR12_010812-T1|Product=Beta-hexosaminidase 3|Dbxref=InterPro:IPR017853;InterPro:IPR025705;InterPro:IPR015883,PARKENT|GeneID=OUR12_010813-T1|Product=Beta-hexosaminidase 3|Dbxref=InterPro:IPR017853;InterPro:IPR015883;InterPro:IPR025705;PFAM:PF14845;InterPro:IPR029018;InterPro:IPR029019,PARKENT|GeneID=OUR12_019444-T1|Product=Beta-hexosaminidase 1|Dbxref=InterPro:IPR017853;PFAM:PF0072…
GO:0004564	PARKENT|GeneID=OUR12_002420-T1|Product=hypothetical protein|Dbxref=PFAM:PF11837;InterPro:IPR021792,PARKENT|GeneID=OUR12_024529-T1|Product=Beta-fructofuranosidase, soluble isoenzyme I|Dbxref=InterPro:IPR050551;InterPro:IPR001362;PFAM:PF00251;InterPro:IPR013148;PFAM:PF08244;InterPro:IPR013189;InterPro:IPR023296;InterPro:IPR021792;PFAM:PF11837;InterPro:IPR013320
GO:0004565	PARKENT|GeneID=OUR12_003136-T1|Product=Beta-galactosidase 3|Dbxref=InterPro:IPR001944;InterPro:IPR017853;PFAM:PF21467;InterPro:IPR000922;PFAM:PF17834;PFAM:PF02140;InterPro:IPR043159;InterPro:IPR008979;InterPro:IPR048913;InterPro:IPR041392;InterPro:IPR019801;PFAM:PF01301;InterPro:IPR031330,PARKENT|GeneID=OUR12_003314-T1|Product=hypothetical protein|Dbxref=InterPro:IPR001944;InterPro:IPR017853;PFAM…
GO:0004566	PARKENT|GeneID=OUR12_004984-T1|Product=hypothetical protein|Dbxref=InterPro:IPR017853;InterPro:IPR005199,PARKENT|GeneID=OUR12_004985-T1|Product=hypothetical protein|Dbxref=InterPro:IPR017853;InterPro:IPR005199,PARKENT|GeneID=OUR12_017120-T1|Product=hypothetical protein|Dbxref=InterPro:IPR017853;PFAM:PF03662;InterPro:IPR005199,PARKENT|GeneID=OUR12_026048-T1|Product=hypothetical protein|Dbxref=Inte…
GO:0004568	PARKENT|GeneID=OUR12_003405-T1|Product=Basic endochitinase|Dbxref=PFAM:PF00182;PFAM:PF00187;InterPro:IPR001002;InterPro:IPR023346;InterPro:IPR018371;InterPro:IPR000726;InterPro:IPR036861,PARKENT|GeneID=OUR12_005822-T1|Product=hypothetical protein|Dbxref=InterPro:IPR023346;InterPro:IPR000726,PARKENT|GeneID=OUR12_005823-T1|Product=hypothetical protein|Dbxref=InterPro:IPR023346;InterPro:IPR000726,PA…
GO:0004571	PARKENT|GeneID=OUR12_006777-T1|Product=Alpha-mannosidase I mns4|Dbxref=InterPro:IPR012341;InterPro:IPR036026;PFAM:PF01532;InterPro:IPR044674;InterPro:IPR001382,PARKENT|GeneID=OUR12_014851-T1|Product=mannosyl-oligosaccharide alpha-1,2-mannosidase|Dbxref=InterPro:IPR036026;InterPro:IPR012341;InterPro:IPR050749;InterPro:IPR001382,PARKENT|GeneID=OUR12_014852-T1|Product=hypothetical protein|Dbxref=Int…
GO:0004575	PARKENT|GeneID=OUR12_003246-T1|Product=hypothetical protein|Dbxref=InterPro:IPR024746;InterPro:IPR008928;PFAM:PF12899;InterPro:IPR012341,PARKENT|GeneID=OUR12_006265-T1|Product=nuclear integrity protein 1|Dbxref=InterPro:IPR024746;InterPro:IPR008928;PFAM:PF12899;InterPro:IPR012341,PARKENT|GeneID=OUR12_007220-T1|Product=Alkaline neutral invertase|Dbxref=InterPro:IPR024746,PARKENT|GeneID=OUR12_00892…
GO:0004576	PARKENT|GeneID=OUR12_016814-T1|Product=Dolichyl-diphosphooligosaccharide--protein glycosyltransferase subunit stt3a|Dbxref=InterPro:IPR048999;InterPro:IPR048307;InterPro:IPR003674;PFAM:PF02516,PARKENT|GeneID=OUR12_026464-T1|Product=Dolichyl-diphosphooligosaccharide--protein glycosyltransferase subunit stt3b|Dbxref=InterPro:IPR048999;InterPro:IPR048307;InterPro:IPR003674;PFAM:PF02516
GO:0004582	PARKENT|GeneID=OUR12_026684-T1|Product=Dolichol-phosphate mannosyltransferase subunit 1|Dbxref=InterPro:IPR029044;InterPro:IPR039528;InterPro:IPR001173;PFAM:PF00535
GO:0004585	PARKENT|GeneID=OUR12_027777-T1|Product=hypothetical protein|Dbxref=PFAM:PF02729;InterPro:IPR006131;InterPro:IPR024904;InterPro:IPR002292;InterPro:IPR006132;PFAM:PF00185;InterPro:IPR006130;InterPro:IPR036901
GO:0004586	PARKENT|GeneID=OUR12_016940-T1|Product=hypothetical protein|Dbxref=InterPro:IPR009006;InterPro:IPR022653;PFAM:PF02784;InterPro:IPR022657;InterPro:IPR029066;InterPro:IPR002433;InterPro:IPR000183;InterPro:IPR022643;InterPro:IPR022644;PFAM:PF00278,PARKENT|GeneID=OUR12_026740-T1|Product=hypothetical protein|Dbxref=InterPro:IPR009006;InterPro:IPR022653;PFAM:PF02784;InterPro:IPR022657;InterPro:IPR02906…
GO:0004587	PARKENT|GeneID=OUR12_016019-T1|Product=hypothetical protein|Dbxref=InterPro:IPR010164;InterPro:IPR005814;InterPro:IPR015422;PFAM:PF00202;InterPro:IPR050103;InterPro:IPR015424;InterPro:IPR015421;InterPro:IPR049704
GO:0004588	PARKENT|GeneID=OUR12_020419-T1|Product=hypothetical protein|Dbxref=InterPro:IPR013785;InterPro:IPR029057;PFAM:PF00156;InterPro:IPR023031;InterPro:IPR011060;InterPro:IPR000836;InterPro:IPR001754;InterPro:IPR004467
GO:0004590	PARKENT|GeneID=OUR12_020419-T1|Product=hypothetical protein|Dbxref=InterPro:IPR013785;InterPro:IPR029057;PFAM:PF00156;InterPro:IPR023031;InterPro:IPR011060;InterPro:IPR000836;InterPro:IPR001754;InterPro:IPR004467
GO:0004591	PARKENT|GeneID=OUR12_019473-T1|Product=hypothetical protein|Dbxref=InterPro:IPR001017;PFAM:PF16870;InterPro:IPR042179;InterPro:IPR032106;InterPro:IPR011603;PFAM:PF16078;InterPro:IPR031717;PFAM:PF02779;PFAM:PF00676;InterPro:IPR029061;InterPro:IPR005475
GO:0004592	PARKENT|GeneID=OUR12_010376-T1|Product=hypothetical protein|Dbxref=InterPro:IPR004821;InterPro:IPR014729;InterPro:IPR003721;InterPro:IPR042176;PFAM:PF02569
GO:0004594	PARKENT|GeneID=OUR12_000885-T1|Product=Pantothenate kinase 2, mitochondrial|Dbxref=PFAM:PF03630;InterPro:IPR004567;InterPro:IPR043129,PARKENT|GeneID=OUR12_003472-T1|Product=hypothetical protein|Dbxref=InterPro:IPR004567;InterPro:IPR002791;PFAM:PF01937;InterPro:IPR036075;InterPro:IPR035073;InterPro:IPR016949,PARKENT|GeneID=OUR12_026211-T1|Product=Pantothenate kinase 2, mitochondrial|Dbxref=PFAM:PF…
GO:0004595	PARKENT|GeneID=OUR12_005544-T1|Product=hypothetical protein|Dbxref=InterPro:IPR014729;InterPro:IPR004821;PFAM:PF01467
GO:0004596	PARKENT|GeneID=OUR12_009568-T1|Product=N(alpha)-acetyltransferase 20, NatB catalytic subunit|Dbxref=InterPro:IPR051646;InterPro:IPR016181;InterPro:IPR000182;PFAM:PF08445;PFAM:PF13508;PFAM:PF00583,PARKENT|GeneID=OUR12_020541-T1|Product=N-alpha-acetyltransferase 10|Dbxref=InterPro:IPR016181;InterPro:IPR000182;PFAM:PF08445;PFAM:PF13673;PFAM:PF13508;PFAM:PF00583;InterPro:IPR045047,PARKENT|GeneID=OUR1…
GO:0004601	PARKENT|GeneID=OUR12_000032-T1|Product=hypothetical protein|Dbxref=InterPro:IPR000719;InterPro:IPR024788;InterPro:IPR019794;InterPro:IPR008271;PFAM:PF12819;PFAM:PF11721;InterPro:IPR001245;InterPro:IPR045272;PFAM:PF00069;InterPro:IPR017441;PFAM:PF07714;InterPro:IPR011009,PARKENT|GeneID=OUR12_000830-T1|Product=hypothetical protein|Dbxref=InterPro:IPR000823;InterPro:IPR019794;InterPro:IPR010255;Inte…
GO:0004602	PARKENT|GeneID=OUR12_005221-T1|Product=hypothetical protein|Dbxref=PFAM:PF01124;InterPro:IPR001129;InterPro:IPR050997;InterPro:IPR023352
GO:0004604	PARKENT|GeneID=OUR12_015067-T1|Product=aspartic proteinase precursor|Dbxref=InterPro:IPR002500;InterPro:IPR013766;InterPro:IPR004511;InterPro:IPR014729;PFAM:PF00085;InterPro:IPR004508;InterPro:IPR036249;PFAM:PF01507,PARKENT|GeneID=OUR12_018187-T1|Product=5'-adenylylsulfate reductase 3, chloroplastic|Dbxref=InterPro:IPR002500;InterPro:IPR011798;InterPro:IPR013766;InterPro:IPR004511;InterPro:IPR014…
GO:0004605	PARKENT|GeneID=OUR12_000128-T1|Product=hypothetical protein|Dbxref=InterPro:IPR015222,PARKENT|GeneID=OUR12_015173-T1|Product=phosphatidate cytidylyltransferase|Dbxref=PFAM:PF01148;InterPro:IPR000374;InterPro:IPR016720,PARKENT|GeneID=OUR12_029657-T1|Product=phosphatidate cytidylyltransferase|Dbxref=InterPro:IPR016720
GO:0004609	PARKENT|GeneID=OUR12_002489-T1|Product=phosphatidylserine decarboxylase 1|Dbxref=InterPro:IPR033177;PFAM:PF02666;InterPro:IPR003817,PARKENT|GeneID=OUR12_010496-T1|Product=phosphatidylserine decarboxylase|Dbxref=InterPro:IPR003817,PARKENT|GeneID=OUR12_010515-T1|Product=phosphatidylserine decarboxylase|Dbxref=InterPro:IPR003817,PARKENT|GeneID=OUR12_018738-T1|Product=phosphatidylserine decarboxylase…
GO:0004610	PARKENT|GeneID=OUR12_002669-T1|Product=hypothetical protein|Dbxref=PFAM:PF21405;InterPro:IPR049022;InterPro:IPR016055;PFAM:PF21404;PFAM:PF00408;InterPro:IPR005843;PFAM:PF02880;InterPro:IPR036900;InterPro:IPR016657;InterPro:IPR049023
GO:0004611	PARKENT|GeneID=OUR12_011210-T1|Product=Protein kinase C-like 1|Dbxref=InterPro:IPR008210;InterPro:IPR015994;InterPro:IPR001272;InterPro:IPR013035;PFAM:PF01293,PARKENT|GeneID=OUR12_024157-T1|Product=hypothetical protein|Dbxref=InterPro:IPR008210;InterPro:IPR036322;PFAM:PF08625;InterPro:IPR020472;InterPro:IPR019775;PFAM:PF00400;InterPro:IPR013934;InterPro:IPR013035;InterPro:IPR001680;InterPro:IPR01…
GO:0004612	PARKENT|GeneID=OUR12_011210-T1|Product=Protein kinase C-like 1|Dbxref=InterPro:IPR008210;InterPro:IPR015994;InterPro:IPR001272;InterPro:IPR013035;PFAM:PF01293,PARKENT|GeneID=OUR12_028811-T1|Product=Protein kinase C-like 1|Dbxref=InterPro:IPR008210;InterPro:IPR001272;InterPro:IPR013035
GO:0004614	PARKENT|GeneID=OUR12_000586-T1|Product=Phosphoglucomutase-1|Dbxref=PFAM:PF02878;InterPro:IPR016055;InterPro:IPR005844;InterPro:IPR045244;PFAM:PF02879;InterPro:IPR036900;InterPro:IPR005845;PFAM:PF02880;InterPro:IPR016066;PFAM:PF24947;InterPro:IPR005846;InterPro:IPR005841
GO:0004615	PARKENT|GeneID=OUR12_000570-T1|Product=hypothetical protein|Dbxref=InterPro:IPR016055;PFAM:PF02879;InterPro:IPR005845;PFAM:PF02880;InterPro:IPR005846;InterPro:IPR005841;InterPro:IPR050060,PARKENT|GeneID=OUR12_000571-T1|Product=hypothetical protein|Dbxref=PFAM:PF02878;InterPro:IPR050060;InterPro:IPR005844;InterPro:IPR016055,PARKENT|GeneID=OUR12_019802-T1|Product=hypothetical protein|Dbxref=InterPr…
GO:0004616	PARKENT|GeneID=OUR12_001347-T1|Product=6-phosphogluconate dehydrogenase, decarboxylating 2|Dbxref=InterPro:IPR006113;InterPro:IPR006115;PFAM:PF03446;PFAM:PF00393;InterPro:IPR013328;InterPro:IPR036291;InterPro:IPR006183;InterPro:IPR008927;InterPro:IPR006114,PARKENT|GeneID=OUR12_001913-T1|Product=6-phosphogluconate dehydrogenase, decarboxylating 3, chloroplastic|Dbxref=InterPro:IPR006113;InterPro:I…
GO:0004617	PARKENT|GeneID=OUR12_003567-T1|Product=hypothetical protein|Dbxref=,PARKENT|GeneID=OUR12_003796-T1|Product=D-3-phosphoglycerate dehydrogenase 1, chloroplastic|Dbxref=InterPro:IPR045865;InterPro:IPR029009;PFAM:PF07991;PFAM:PF00389;InterPro:IPR045626;InterPro:IPR006140;InterPro:IPR002912;PFAM:PF02826;InterPro:IPR029752;InterPro:IPR006139;InterPro:IPR036291;PFAM:PF01842;InterPro:IPR006236;InterPro:I…
GO:0004618	PARKENT|GeneID=OUR12_012514-T1|Product=hypothetical protein|Dbxref=PFAM:PF00162;InterPro:IPR036043;InterPro:IPR015824;InterPro:IPR001576,PARKENT|GeneID=OUR12_030273-T1|Product=hypothetical protein|Dbxref=PFAM:PF00162;InterPro:IPR036043;InterPro:IPR001576;InterPro:IPR015824;InterPro:IPR015911,PARKENT|GeneID=OUR12_030274-T1|Product=hypothetical protein|Dbxref=PFAM:PF00162;InterPro:IPR036043;InterPr…
GO:0004619	PARKENT|GeneID=OUR12_011857-T1|Product=2,3-bisphosphoglycerate-independent phosphoglycerate mutase|Dbxref=InterPro:IPR011258;InterPro:IPR005995;InterPro:IPR006124;PFAM:PF06415;InterPro:IPR017850;InterPro:IPR036646;PFAM:PF01676
GO:0004620	PARKENT|GeneID=OUR12_000194-T1|Product=Lecithin-cholesterol acyltransferase-like 4|Dbxref=InterPro:IPR003386;InterPro:IPR029058,PARKENT|GeneID=OUR12_002542-T1|Product=hypothetical protein|Dbxref=PFAM:PF01764;InterPro:IPR002921;InterPro:IPR029058,PARKENT|GeneID=OUR12_007440-T1|Product=hypothetical protein|Dbxref=PFAM:PF01764;InterPro:IPR002921;InterPro:IPR029058,PARKENT|GeneID=OUR12_008085-T1|Prod…
GO:0004623	PARKENT|GeneID=OUR12_009032-T1|Product=hypothetical protein|Dbxref=InterPro:IPR036444,PARKENT|GeneID=OUR12_016738-T1|Product=Probable phospholipase A2 1|Dbxref=InterPro:IPR033113;InterPro:IPR036444;InterPro:IPR001211,PARKENT|GeneID=OUR12_017506-T1|Product=Phospholipase A2-alpha|Dbxref=InterPro:IPR033113;InterPro:IPR036444;InterPro:IPR001211,PARKENT|GeneID=OUR12_027869-T1|Product=hypothetical prot…
GO:0004630	PARKENT|GeneID=OUR12_002310-T1|Product=Phospholipase D beta 1|Dbxref=PFAM:PF00614;InterPro:IPR001736;InterPro:IPR035892;InterPro:IPR015679;PFAM:PF00168;InterPro:IPR000008;PFAM:PF12357;InterPro:IPR011402;InterPro:IPR024632,PARKENT|GeneID=OUR12_004883-T1|Product=Phospholipase D|Dbxref=PFAM:PF00614;InterPro:IPR001736;InterPro:IPR015679;InterPro:IPR024632;PFAM:PF12357;InterPro:IPR011402;InterPro:IPR0…
GO:0004631	PARKENT|GeneID=OUR12_002849-T1|Product=hypothetical protein|Dbxref=InterPro:IPR014721;InterPro:IPR020568;InterPro:IPR035102;InterPro:IPR006204;PFAM:PF00288
GO:0004632	PARKENT|GeneID=OUR12_027000-T1|Product=Phosphopantothenate--cysteine ligase 2|Dbxref=PFAM:PF04127;InterPro:IPR035929;InterPro:IPR007085
GO:0004633	PARKENT|GeneID=OUR12_026368-T1|Product=Phosphopantothenoylcysteine decarboxylase|Dbxref=InterPro:IPR036551;PFAM:PF02441;InterPro:IPR003382
GO:0004634	PARKENT|GeneID=OUR12_008504-T1|Product=Beta-enolase|Dbxref=PFAM:PF00113;InterPro:IPR036849;PFAM:PF03952;InterPro:IPR000941;InterPro:IPR020810;InterPro:IPR020811;InterPro:IPR029017;InterPro:IPR020809,PARKENT|GeneID=OUR12_009100-T1|Product=hypothetical protein|Dbxref=InterPro:IPR036849;InterPro:IPR036419;PFAM:PF03952;InterPro:IPR000941;InterPro:IPR020810;InterPro:IPR020811;InterPro:IPR029017,PARKEN…
GO:0004635	PARKENT|GeneID=OUR12_022114-T1|Product=Histidine biosynthesis bifunctional protein hisIE, chloroplastic|Dbxref=InterPro:IPR023019;InterPro:IPR008179;InterPro:IPR021130;InterPro:IPR002496;PFAM:PF01502;PFAM:PF01503;InterPro:IPR038019
GO:0004636	PARKENT|GeneID=OUR12_022114-T1|Product=Histidine biosynthesis bifunctional protein hisIE, chloroplastic|Dbxref=InterPro:IPR023019;InterPro:IPR008179;InterPro:IPR021130;InterPro:IPR002496;PFAM:PF01502;PFAM:PF01503;InterPro:IPR038019
GO:0004637	PARKENT|GeneID=OUR12_009899-T1|Product=Phosphoribosylformylglycinamidine cyclo-ligase, chloroplastic|Dbxref=InterPro:IPR010918;InterPro:IPR016188;PFAM:PF00586;InterPro:IPR004733;PFAM:PF02769;InterPro:IPR036676;InterPro:IPR036921,PARKENT|GeneID=OUR12_018603-T1|Product=Phosphoribosylamine--glycine ligase, chloroplastic|Dbxref=InterPro:IPR011054;InterPro:IPR016185;InterPro:IPR011761;InterPro:IPR0205…
GO:0004640	PARKENT|GeneID=OUR12_018543-T1|Product=hypothetical protein|Dbxref=InterPro:IPR013785;InterPro:IPR045186;InterPro:IPR013798;InterPro:IPR001468;InterPro:IPR011060;PFAM:PF00218,PARKENT|GeneID=OUR12_019226-T1|Product=hypothetical protein|Dbxref=InterPro:IPR013785;InterPro:IPR001240;InterPro:IPR011060;InterPro:IPR044643;PFAM:PF00697
GO:0004641	PARKENT|GeneID=OUR12_009899-T1|Product=Phosphoribosylformylglycinamidine cyclo-ligase, chloroplastic|Dbxref=InterPro:IPR010918;InterPro:IPR016188;PFAM:PF00586;InterPro:IPR004733;PFAM:PF02769;InterPro:IPR036676;InterPro:IPR036921,PARKENT|GeneID=OUR12_022688-T1|Product=hypothetical protein|Dbxref=InterPro:IPR010918;InterPro:IPR016188;InterPro:IPR004733;PFAM:PF02769;InterPro:IPR036676;InterPro:IPR03…
GO:0004642	PARKENT|GeneID=OUR12_019585-T1|Product=hypothetical protein|Dbxref=InterPro:IPR040707;InterPro:IPR010918;InterPro:IPR041609;PFAM:PF13507;InterPro:IPR029062;InterPro:IPR036604;PFAM:PF18072;PFAM:PF02769;PFAM:PF18076;InterPro:IPR036676;PFAM:PF22689;InterPro:IPR036921;InterPro:IPR010073
GO:0004643	PARKENT|GeneID=OUR12_000158-T1|Product=hypothetical protein|Dbxref=PFAM:PF01808;InterPro:IPR002695;InterPro:IPR036914;InterPro:IPR011607;PFAM:PF02142;InterPro:IPR024051;InterPro:IPR016193,PARKENT|GeneID=OUR12_005265-T1|Product=hypothetical protein|Dbxref=InterPro:IPR007080;InterPro:IPR002695;InterPro:IPR036914;InterPro:IPR011607
GO:0004644	PARKENT|GeneID=OUR12_015168-T1|Product=Phosphoribosylglycinamide formyltransferase (GART)|Dbxref=InterPro:IPR002376;InterPro:IPR004607;PFAM:PF00551;InterPro:IPR001555;InterPro:IPR036477
GO:0004645	PARKENT|GeneID=OUR12_008517-T1|Product=hypothetical protein|Dbxref=PFAM:PF00343;InterPro:IPR011833;InterPro:IPR035090;InterPro:IPR000811,PARKENT|GeneID=OUR12_015660-T1|Product=hypothetical protein|Dbxref=PFAM:PF00343;InterPro:IPR011833;InterPro:IPR035090;InterPro:IPR000811
GO:0004647	PARKENT|GeneID=OUR12_026085-T1|Product=hypothetical protein|Dbxref=InterPro:IPR023214;InterPro:IPR036412;PFAM:PF00702;InterPro:IPR050582
GO:0004648	PARKENT|GeneID=OUR12_005844-T1|Product=Phosphoserine aminotransferase 2, chloroplastic|Dbxref=InterPro:IPR020578;InterPro:IPR000192;PFAM:PF00266;InterPro:IPR015422;InterPro:IPR022278;InterPro:IPR015424;InterPro:IPR015421
GO:0004649	PARKENT|GeneID=OUR12_018541-T1|Product=hypothetical protein|Dbxref=PFAM:PF05028;InterPro:IPR046372;PFAM:PF20811;InterPro:IPR048362;InterPro:IPR007724
GO:0004650	PARKENT|GeneID=OUR12_000037-T1|Product=hypothetical protein|Dbxref=InterPro:IPR006626;InterPro:IPR012334;InterPro:IPR011050;InterPro:IPR000743;PFAM:PF00295,PARKENT|GeneID=OUR12_000145-T1|Product=Polygalacturonase qrt3|Dbxref=PFAM:PF12708;InterPro:IPR039279;InterPro:IPR006626;InterPro:IPR012334;InterPro:IPR024535;InterPro:IPR011050,PARKENT|GeneID=OUR12_000146-T1|Product=hypothetical protein|Dbxref…
GO:0004652	PARKENT|GeneID=OUR12_000461-T1|Product=Nuclear poly(A) polymerase 1|Dbxref=InterPro:IPR007010;PFAM:PF04928;InterPro:IPR048840;InterPro:IPR043519;InterPro:IPR011068;InterPro:IPR007012,PARKENT|GeneID=OUR12_006246-T1|Product=hypothetical protein|Dbxref=PFAM:PF04928;PFAM:PF01909;InterPro:IPR043519;PFAM:PF20750;InterPro:IPR048840;InterPro:IPR007010;InterPro:IPR011068;InterPro:IPR007012,PARKENT|GeneID=…
GO:0004654	PARKENT|GeneID=OUR12_011973-T1|Product=Purine nucleoside phosphorylase|Dbxref=InterPro:IPR004087;InterPro:IPR012340;InterPro:IPR012162;InterPro:IPR036612;PFAM:PF00013;InterPro:IPR004088;InterPro:IPR003029;PFAM:PF00575,PARKENT|GeneID=OUR12_011974-T1|Product=Purine nucleoside phosphorylase|Dbxref=InterPro:IPR001247;InterPro:IPR012162;InterPro:IPR015847;InterPro:IPR020568;InterPro:IPR036345;InterPro…
GO:0004655	PARKENT|GeneID=OUR12_026880-T1|Product=Delta-aminolevulinic acid dehydratase 1, chloroplastic|Dbxref=InterPro:IPR001731;PFAM:PF00490;InterPro:IPR013785;InterPro:IPR030656
GO:0004656	PARKENT|GeneID=OUR12_003857-T1|Product=Probable prolyl 4-hydroxylase 9|Dbxref=InterPro:IPR044862;PFAM:PF03171;InterPro:IPR045054;InterPro:IPR006620;PFAM:PF13640;InterPro:IPR005123,PARKENT|GeneID=OUR12_003859-T1|Product=hypothetical protein|Dbxref=InterPro:IPR045054,PARKENT|GeneID=OUR12_003860-T1|Product=hypothetical protein|Dbxref=InterPro:IPR044862;InterPro:IPR045054;InterPro:IPR006620;PFAM:PF13…
GO:0004657	PARKENT|GeneID=OUR12_021926-T1|Product=hypothetical protein|Dbxref=InterPro:IPR029041;InterPro:IPR002872;PFAM:PF01619;InterPro:IPR015659
GO:0004659	PARKENT|GeneID=OUR12_000238-T1|Product=Palmitoyl-protein thioesterase 1|Dbxref=InterPro:IPR044878;InterPro:IPR030470;InterPro:IPR039653;InterPro:IPR006370;PFAM:PF01040;InterPro:IPR000537,PARKENT|GeneID=OUR12_003382-T1|Product=hypothetical protein|Dbxref=InterPro:IPR000092;InterPro:IPR008949;InterPro:IPR033749;PFAM:PF00348,PARKENT|GeneID=OUR12_004208-T1|Product=glutathione S-conjugate-exporting AT…
GO:0004660	PARKENT|GeneID=OUR12_007545-T1|Product=hypothetical protein|Dbxref=PFAM:PF01239;InterPro:IPR002088,PARKENT|GeneID=OUR12_022486-T1|Product=hypothetical protein|Dbxref=InterPro:IPR008930;InterPro:IPR001330;InterPro:IPR026872;InterPro:IPR045089;PFAM:PF00432
GO:0004661	PARKENT|GeneID=OUR12_019543-T1|Product=hypothetical protein|Dbxref=InterPro:IPR041960;InterPro:IPR008930;InterPro:IPR001330;InterPro:IPR045089;PFAM:PF00432
GO:0004662	PARKENT|GeneID=OUR12_007545-T1|Product=hypothetical protein|Dbxref=PFAM:PF01239;InterPro:IPR002088,PARKENT|GeneID=OUR12_019543-T1|Product=hypothetical protein|Dbxref=InterPro:IPR041960;InterPro:IPR008930;InterPro:IPR001330;InterPro:IPR045089;PFAM:PF00432
GO:0004663	PARKENT|GeneID=OUR12_011985-T1|Product=hypothetical protein|Dbxref=InterPro:IPR008930;InterPro:IPR045089,PARKENT|GeneID=OUR12_018406-T1|Product=hypothetical protein|Dbxref=InterPro:IPR008930;InterPro:IPR001330;InterPro:IPR045089;InterPro:IPR026873;PFAM:PF00432,PARKENT|GeneID=OUR12_018407-T1|Product=Geranylgeranyl transferase type-2 subunit beta 1|Dbxref=InterPro:IPR001330;InterPro:IPR008930;Inter…
GO:0004664	PARKENT|GeneID=OUR12_008224-T1|Product=Arogenate dehydratase 2|Dbxref=InterPro:IPR045865;PFAM:PF00800;InterPro:IPR001086;InterPro:IPR018528;InterPro:IPR002912,PARKENT|GeneID=OUR12_009247-T1|Product=Arogenate dehydratase 3|Dbxref=InterPro:IPR045865;PFAM:PF00800;InterPro:IPR001086;InterPro:IPR018528;InterPro:IPR002912,PARKENT|GeneID=OUR12_015070-T1|Product=ADP,ATP carrier protein|Dbxref=InterPro:IP…
GO:0004665	PARKENT|GeneID=OUR12_014441-T1|Product=Arogenate dehydrogenase 2, chloroplastic|Dbxref=PFAM:PF03807;PFAM:PF02153;PFAM:PF03446;PFAM:PF02826;InterPro:IPR003099;InterPro:IPR036291;PFAM:PF26213;InterPro:IPR012070;InterPro:IPR028939;InterPro:IPR045011,PARKENT|GeneID=OUR12_019305-T1|Product=ATP-binding cassette transporter CGR1|Dbxref=PFAM:PF03807;PFAM:PF02153;InterPro:IPR003099;InterPro:IPR036291;Inte…
GO:0004668	PARKENT|GeneID=OUR12_025765-T1|Product=hypothetical protein|Dbxref=InterPro:IPR007466
GO:0004671	PARKENT|GeneID=OUR12_008416-T1|Product=hypothetical protein|Dbxref=PFAM:PF04191;InterPro:IPR007269;PFAM:PF04140,PARKENT|GeneID=OUR12_016386-T1|Product=hypothetical protein|Dbxref=InterPro:IPR025770;PFAM:PF04191;InterPro:IPR007269;PFAM:PF04140,PARKENT|GeneID=OUR12_018604-T1|Product=hypothetical protein|Dbxref=PFAM:PF04191;InterPro:IPR007269;PFAM:PF04140,PARKENT|GeneID=OUR12_018606-T1|Product=hypot…
GO:0004672	PARKENT|GeneID=OUR12_000032-T1|Product=hypothetical protein|Dbxref=InterPro:IPR000719;InterPro:IPR024788;InterPro:IPR019794;InterPro:IPR008271;PFAM:PF12819;PFAM:PF11721;InterPro:IPR001245;InterPro:IPR045272;PFAM:PF00069;InterPro:IPR017441;PFAM:PF07714;Int
GO:0004674	PARKENT|GeneID=OUR12_000172-T1|Product=hypothetical protein|Dbxref=InterPro:IPR008271;InterPro:IPR050494;PFAM:PF00069;InterPro:IPR000719;InterPro:IPR011009,PARKENT|GeneID=OUR12_000355-T1|Product=hypothetical protein|Dbxref=InterPro:IPR008271;InterPro:IPR0
GO:0004675	PARKENT|GeneID=OUR12_008432-T1|Product=hypothetical protein|Dbxref=InterPro:IPR001220;InterPro:IPR013320;InterPro:IPR008271;PFAM:PF00139;PFAM:PF00069;InterPro:IPR050528;InterPro:IPR017441;InterPro:IPR000719;PFAM:PF07714;InterPro:IPR011009,PARKENT|GeneID=OUR12_012249-T1|Product=hypothetical protein|Dbxref=InterPro:IPR001220;InterPro:IPR013320;InterPro:IPR008271;PFAM:PF00139;PFAM:PF00069;InterPro:I…
GO:0004683	PARKENT|GeneID=OUR12_001889-T1|Product=Mitogen-activated protein kinase cpk1|Dbxref=InterPro:IPR000719;PFAM:PF00036;InterPro:IPR018247;PFAM:PF13499;InterPro:IPR050205;InterPro:IPR011009;InterPro:IPR002048;PFAM:PF13833;InterPro:IPR008271;InterPro:IPR011992;PFAM:PF13405;InterPro:IPR017441;PFAM:PF07714;PFAM:PF00069;PFAM:PF13202,PARKENT|GeneID=OUR12_002294-T1|Product=hypothetical protein|Dbxref=Inter…
GO:0004691	PARKENT|GeneID=OUR12_016826-T1|Product=hypothetical protein|Dbxref=InterPro:IPR000719;InterPro:IPR018490;InterPro:IPR011009;InterPro:IPR036457;PFAM:PF00481;InterPro:IPR001932;InterPro:IPR014710;InterPro:IPR000222;PFAM:PF00069;PFAM:PF00027;PFAM:PF07714;InterPro:IPR000595
GO:0004693	PARKENT|GeneID=OUR12_009030-T1|Product=Cyclin-dependent kinase 3|Dbxref=InterPro:IPR011009;InterPro:IPR000719;InterPro:IPR050108,PARKENT|GeneID=OUR12_011858-T1|Product=Cell division control protein 2 C|Dbxref=PFAM:PF06293;InterPro:IPR000719;InterPro:IPR008271;InterPro:IPR050108;PFAM:PF00069;InterPro:IPR017441;PFAM:PF07714;InterPro:IPR011009,PARKENT|GeneID=OUR12_021765-T1|Product=Cyclin-dependent …
GO:0004694	PARKENT|GeneID=OUR12_007559-T1|Product=hypothetical protein|Dbxref=InterPro:IPR050339;InterPro:IPR000719;InterPro:IPR011009
GO:0004707	PARKENT|GeneID=OUR12_000544-T1|Product=Mitogen-activated protein kinase 9|Dbxref=InterPro:IPR011009;InterPro:IPR003527;PFAM:PF00069;InterPro:IPR017441;InterPro:IPR000719;PFAM:PF07714;InterPro:IPR050117,PARKENT|GeneID=OUR12_001840-T1|Product=Mitogen-activated protein kinase mmk2|Dbxref=InterPro:IPR011009;InterPro:IPR003527;InterPro:IPR008271;PFAM:PF00069;InterPro:IPR017441;InterPro:IPR000719;PFAM:…
GO:0004708	PARKENT|GeneID=OUR12_001549-T1|Product=Dual specificity mitogen-activated protein kinase kinase 4|Dbxref=InterPro:IPR008271;PFAM:PF00069;InterPro:IPR017441;InterPro:IPR000719;PFAM:PF07714;InterPro:IPR011009,PARKENT|GeneID=OUR12_016650-T1|Product=hypothetical protein|Dbxref=InterPro:IPR008271;InterPro:IPR001245;PFAM:PF00069;InterPro:IPR017441;InterPro:IPR000719;PFAM:PF07714;InterPro:IPR011009,PARK…
GO:0004712	PARKENT|GeneID=OUR12_026958-T1|Product=hypothetical protein|Dbxref=InterPro:IPR027084;InterPro:IPR008271;PFAM:PF00069;InterPro:IPR017441;InterPro:IPR000719;PFAM:PF07714;InterPro:IPR011009
GO:0004713	PARKENT|GeneID=OUR12_000172-T1|Product=hypothetical protein|Dbxref=InterPro:IPR008271;InterPro:IPR050494;PFAM:PF00069;InterPro:IPR000719;InterPro:IPR011009,PARKENT|GeneID=OUR12_002717-T1|Product=Serine/threonine-protein kinase bsk2|Dbxref=InterPro:IPR000719;InterPro:IPR020635;PFAM:PF25575;InterPro:IPR045845;InterPro:IPR001245;InterPro:IPR011990;PFAM:PF00069;PFAM:PF07714;InterPro:IPR011009,PARKENT…
GO:0004714	PARKENT|GeneID=OUR12_000032-T1|Product=hypothetical protein|Dbxref=InterPro:IPR000719;InterPro:IPR024788;InterPro:IPR019794;InterPro:IPR008271;PFAM:PF12819;PFAM:PF11721;InterPro:IPR001245;InterPro:IPR045272;PFAM:PF00069;InterPro:IPR017441;PFAM:PF07714;InterPro:IPR011009,PARKENT|GeneID=OUR12_001738-T1|Product=hypothetical protein|Dbxref=InterPro:IPR024788;InterPro:IPR008271;PFAM:PF12819;InterPro:I…
GO:0004719	PARKENT|GeneID=OUR12_026327-T1|Product=hypothetical protein|Dbxref=PFAM:PF01135;InterPro:IPR029063;InterPro:IPR000682
GO:0004721	PARKENT|GeneID=OUR12_001736-T1|Product=hypothetical protein|Dbxref=InterPro:IPR036420;InterPro:IPR039189;PFAM:PF00533;InterPro:IPR023214;InterPro:IPR036412;PFAM:PF25505;PFAM:PF12738;InterPro:IPR001357;PFAM:PF03031;InterPro:IPR004274;InterPro:IPR011947,PARKENT|GeneID=OUR12_006554-T1|Product=hypothetical protein|Dbxref=InterPro:IPR029021;InterPro:IPR020422;PFAM:PF00782;InterPro:IPR000387;InterPro:I…
GO:0004722	PARKENT|GeneID=OUR12_000798-T1|Product=hypothetical protein|Dbxref=InterPro:IPR015655;InterPro:IPR036457;PFAM:PF00481;InterPro:IPR001932;InterPro:IPR000222,PARKENT|GeneID=OUR12_001029-T1|Product=Serine/threonine-protein phosphatase pp2a catalytic subunit|Dbxref=InterPro:IPR029052;InterPro:IPR004843;InterPro:IPR006186;InterPro:IPR047129;PFAM:PF00149,PARKENT|GeneID=OUR12_001797-T1|Product=hypotheti…
GO:0004725	PARKENT|GeneID=OUR12_002703-T1|Product=hypothetical protein|Dbxref=InterPro:IPR006545;InterPro:IPR036412;InterPro:IPR028472;InterPro:IPR038102,PARKENT|GeneID=OUR12_009278-T1|Product=hypothetical protein|Dbxref=InterPro:IPR052995;InterPro:IPR023485;InterPro:IPR036196;InterPro:IPR017867;PFAM:PF01451,PARKENT|GeneID=OUR12_010089-T1|Product=hypothetical protein|Dbxref=InterPro:IPR029021;InterPro:IPR05…
GO:0004729	PARKENT|GeneID=OUR12_010060-T1|Product=Protoporphyrinogen oxidase 1, chloroplastic|Dbxref=PFAM:PF01593;InterPro:IPR050464;PFAM:PF13450;InterPro:IPR004572;InterPro:IPR036188;InterPro:IPR002937,PARKENT|GeneID=OUR12_022273-T1|Product=hypothetical protein|Dbxref=PFAM:PF01593;InterPro:IPR050464;PFAM:PF13450;InterPro:IPR004572;InterPro:IPR036188;InterPro:IPR002937
GO:0004730	PARKENT|GeneID=OUR12_007504-T1|Product=hypothetical protein|Dbxref=PFAM:PF25335;InterPro:IPR007342;InterPro:IPR022830,PARKENT|GeneID=OUR12_008960-T1|Product=hypothetical protein|Dbxref=InterPro:IPR007342;InterPro:IPR022830
GO:0004733	PARKENT|GeneID=OUR12_023761-T1|Product=Pyridoxine/pyridoxamine 5'-phosphate oxidase 2|Dbxref=InterPro:IPR024624;InterPro:IPR000659;InterPro:IPR012349;PFAM:PF12766,PARKENT|GeneID=OUR12_027165-T1|Product=Pyridoxine/pyridoxamine 5'-phosphate oxidase 1, chloroplastic|Dbxref=InterPro:IPR004443;PFAM:PF01243;InterPro:IPR036652;InterPro:IPR012349;PFAM:PF03853;InterPro:IPR019740;InterPro:IPR019576;InterPr…
GO:0004735	PARKENT|GeneID=OUR12_013356-T1|Product=hypothetical protein|Dbxref=PFAM:PF14748;PFAM:PF03807;InterPro:IPR029036;InterPro:IPR000304;PFAM:PF03446;InterPro:IPR036291;InterPro:IPR008927;InterPro:IPR028939;InterPro:IPR053790
GO:0004737	PARKENT|GeneID=OUR12_008608-T1|Product=hypothetical protein|Dbxref=PFAM:PF02775;InterPro:IPR011766;InterPro:IPR047214;PFAM:PF02776;InterPro:IPR012110;InterPro:IPR029035;InterPro:IPR012001;InterPro:IPR012000;PFAM:PF00205;InterPro:IPR029061;InterPro:IPR047213,PARKENT|GeneID=OUR12_010907-T1|Product=Pyruvate decarboxylase 3|Dbxref=InterPro:IPR029061;InterPro:IPR012110,PARKENT|GeneID=OUR12_012215-T1|P…
GO:0004739	PARKENT|GeneID=OUR12_001019-T1|Product=Pyruvate dehydrogenase E1 component subunit alpha-2, mitochondrial|Dbxref=InterPro:IPR001017;PFAM:PF02775;InterPro:IPR050642;PFAM:PF00676;InterPro:IPR029061;InterPro:IPR017597,PARKENT|GeneID=OUR12_001706-T1|Product=hypothetical protein|Dbxref=InterPro:IPR009014;InterPro:IPR033248;PFAM:PF02780;PFAM:PF02779;InterPro:IPR027110;InterPro:IPR005475;InterPro:IPR029…
GO:0004740	PARKENT|GeneID=OUR12_006331-T1|Product=hypothetical protein|Dbxref=InterPro:IPR036784;InterPro:IPR005467;InterPro:IPR003594;InterPro:IPR004358;PFAM:PF02518;PFAM:PF10436;InterPro:IPR018955;InterPro:IPR039028;InterPro:IPR036890,PARKENT|GeneID=OUR12_020861-T1|Product=hypothetical protein|Dbxref=InterPro:IPR036784;InterPro:IPR005467;InterPro:IPR003594;InterPro:IPR004358;PFAM:PF02518;PFAM:PF10436;Inte…
GO:0004742	PARKENT|GeneID=OUR12_000359-T1|Product=Lta2p|Dbxref=InterPro:IPR011053;PFAM:PF02817;InterPro:IPR004167;InterPro:IPR036625;InterPro:IPR001078;InterPro:IPR023213;InterPro:IPR045257;PFAM:PF00198,PARKENT|GeneID=OUR12_013917-T1|Product=hypothetical protein|Dbxref=InterPro:IPR011053;PFAM:PF02817;InterPro:IPR006257;InterPro:IPR003016;PFAM:PF00364;InterPro:IPR004167;InterPro:IPR036625;InterPro:IPR001078;…
GO:0004743	PARKENT|GeneID=OUR12_002719-T1|Product=hypothetical protein|Dbxref=InterPro:IPR001697;PFAM:PF02887;InterPro:IPR036918;InterPro:IPR015795,PARKENT|GeneID=OUR12_002720-T1|Product=hypothetical protein|Dbxref=InterPro:IPR015813;InterPro:IPR001697;InterPro:IPR015806;PFAM:PF00224;InterPro:IPR040442;InterPro:IPR018209;InterPro:IPR015793;InterPro:IPR011037,PARKENT|GeneID=OUR12_003958-T1|Product=hypothetic…
GO:0004746	PARKENT|GeneID=OUR12_018105-T1|Product=hypothetical protein|Dbxref=PFAM:PF00677;InterPro:IPR017938;InterPro:IPR001783;InterPro:IPR023366;InterPro:IPR026017
GO:0004747	PARKENT|GeneID=OUR12_028993-T1|Product=hypothetical protein|Dbxref=InterPro:IPR011877;InterPro:IPR002139;InterPro:IPR002173;PFAM:PF00294;InterPro:IPR029056;InterPro:IPR011611
GO:0004748	PARKENT|GeneID=OUR12_011630-T1|Product=ribonucleotide-diphosphate reductase subunit rnr1|Dbxref=PFAM:PF00317;InterPro:IPR013346;InterPro:IPR008926;PFAM:PF03477;InterPro:IPR039718;PFAM:PF02867;InterPro:IPR005144;InterPro:IPR000788;InterPro:IPR013509,PARKENT|GeneID=OUR12_011631-T1|Product=hypothetical protein|Dbxref=InterPro:IPR008926;InterPro:IPR039718;InterPro:IPR000788
GO:0004749	PARKENT|GeneID=OUR12_002658-T1|Product=ribose-phosphate pyrophosphokinase 1|Dbxref=InterPro:IPR029057;InterPro:IPR005946;PFAM:PF00156;PFAM:PF14572;PFAM:PF13793;InterPro:IPR000836;InterPro:IPR000842;InterPro:IPR037515;InterPro:IPR029099,PARKENT|GeneID=OUR12_023255-T1|Product=ribose-phosphate pyrophosphokinase 1|Dbxref=InterPro:IPR029057;InterPro:IPR005946;PFAM:PF00156;PFAM:PF14572;PFAM:PF13793;Int…
GO:0004750	PARKENT|GeneID=OUR12_022265-T1|Product=hypothetical protein|Dbxref=InterPro:IPR011060;InterPro:IPR013785;InterPro:IPR000056,PARKENT|GeneID=OUR12_025997-T1|Product=hypothetical protein|Dbxref=InterPro:IPR026019;InterPro:IPR013785;InterPro:IPR011060;PFAM:PF00834;InterPro:IPR000056
GO:0004751	PARKENT|GeneID=OUR12_000499-T1|Product=Probable ribose-5-phosphate isomerase 2|Dbxref=PFAM:PF06026;InterPro:IPR020672;InterPro:IPR050262;InterPro:IPR037171;InterPro:IPR004788,PARKENT|GeneID=OUR12_008213-T1|Product=Probable ribose-5-phosphate isomerase 2|Dbxref=PFAM:PF06026;InterPro:IPR020672;InterPro:IPR050262;InterPro:IPR037171;InterPro:IPR004788,PARKENT|GeneID=OUR12_016193-T1|Product=Probable r…
GO:0004753	PARKENT|GeneID=OUR12_016497-T1|Product=hypothetical protein|Dbxref=InterPro:IPR051168;InterPro:IPR032095;PFAM:PF16653
GO:0004758	PARKENT|GeneID=OUR12_011818-T1|Product=serine palmitoyltransferase component|Dbxref=InterPro:IPR004839;PFAM:PF00155;InterPro:IPR015422;InterPro:IPR050087;InterPro:IPR015424;InterPro:IPR015421,PARKENT|GeneID=OUR12_022157-T1|Product=hypothetical protein|Dbxref=InterPro:IPR004839;InterPro:IPR001917;PFAM:PF00155;InterPro:IPR015422;InterPro:IPR050087;InterPro:IPR015424;InterPro:IPR015421,PARKENT|GeneI…
GO:0004760	PARKENT|GeneID=OUR12_009083-T1|Product=Serine--glyoxylate aminotransferase|Dbxref=InterPro:IPR020578;InterPro:IPR000192;PFAM:PF00266;InterPro:IPR015422;InterPro:IPR015424;InterPro:IPR015421;InterPro:IPR024169
GO:0004764	PARKENT|GeneID=OUR12_006478-T1|Product=hypothetical protein|Dbxref=InterPro:IPR013785;InterPro:IPR001381;InterPro:IPR046346;InterPro:IPR022893;PFAM:PF01488;PFAM:PF01487;InterPro:IPR036291;InterPro:IPR006151;InterPro:IPR013708;PFAM:PF08501,PARKENT|GeneID=OUR12_021240-T1|Product=hypothetical protein|Dbxref=PFAM:PF03807;InterPro:IPR041121;InterPro:IPR013785;InterPro:IPR001381;InterPro:IPR046346;Inte…
GO:0004765	PARKENT|GeneID=OUR12_011584-T1|Product=Shikimate kinase 1, chloroplastic|Dbxref=InterPro:IPR027417;InterPro:IPR031322,PARKENT|GeneID=OUR12_011585-T1|Product=Shikimate kinase|Dbxref=InterPro:IPR027417;InterPro:IPR031322;PFAM:PF01202;InterPro:IPR023000;InterPro:IPR000623,PARKENT|GeneID=OUR12_028264-T1|Product=hypothetical protein|Dbxref=PFAM:PF13238;InterPro:IPR027417;InterPro:IPR031322;PFAM:PF0120…
GO:0004768	PARKENT|GeneID=OUR12_007703-T1|Product=hypothetical protein|Dbxref=InterPro:IPR009078;InterPro:IPR005067;InterPro:IPR005803;InterPro:IPR012348;PFAM:PF03405,PARKENT|GeneID=OUR12_007704-T1|Product=hypothetical protein|Dbxref=InterPro:IPR009078;InterPro:IPR012348;InterPro:IPR005067,PARKENT|GeneID=OUR12_007710-T1|Product=Stearoyl-[acyl-carrier-protein] 9-desaturase 7, chloroplastic|Dbxref=InterPro:IP…
GO:0004769	PARKENT|GeneID=OUR12_008053-T1|Product=hypothetical protein|Dbxref=InterPro:IPR033118;InterPro:IPR007905;PFAM:PF05241
GO:0004775	PARKENT|GeneID=OUR12_010191-T1|Product=hypothetical protein|Dbxref=InterPro:IPR011761;InterPro:IPR005809;InterPro:IPR013815;InterPro:IPR013650;InterPro:IPR005811;PFAM:PF00549;InterPro:IPR016102;PFAM:PF08442;InterPro:IPR017866,PARKENT|GeneID=OUR12_016340-T1|Product=hypothetical protein|Dbxref=InterPro:IPR003781;PFAM:PF02629;InterPro:IPR036291,PARKENT|GeneID=OUR12_016341-T1|Product=hypothetical pro…
GO:0004776	PARKENT|GeneID=OUR12_016340-T1|Product=hypothetical protein|Dbxref=InterPro:IPR003781;PFAM:PF02629;InterPro:IPR036291,PARKENT|GeneID=OUR12_016341-T1|Product=hypothetical protein|Dbxref=InterPro:IPR016102;InterPro:IPR005811;PFAM:PF00549,PARKENT|GeneID=OUR12_016342-T1|Product=hypothetical protein|Dbxref=InterPro:IPR016102;InterPro:IPR005811;InterPro:IPR017440,PARKENT|GeneID=OUR12_020878-T1|Product=…
GO:0004777	PARKENT|GeneID=OUR12_030313-T1|Product=hypothetical protein|Dbxref=InterPro:IPR016162;InterPro:IPR050740;InterPro:IPR015590;InterPro:IPR016161,PARKENT|GeneID=OUR12_030314-T1|Product=hypothetical protein|Dbxref=InterPro:IPR010102;InterPro:IPR016162;InterPro:IPR015590;InterPro:IPR016163;InterPro:IPR050740;InterPro:IPR016160;InterPro:IPR029510;InterPro:IPR016161
GO:0004781	PARKENT|GeneID=OUR12_006727-T1|Product=Sigma1B-adaptin|Dbxref=InterPro:IPR025980;PFAM:PF01747;InterPro:IPR024951;InterPro:IPR002650;PFAM:PF14306;InterPro:IPR014729;InterPro:IPR015947,PARKENT|GeneID=OUR12_027904-T1|Product=AP-2 complex subunit sigma|Dbxref=InterPro:IPR024951;InterPro:IPR025980;PFAM:PF01747;InterPro:IPR002650;PFAM:PF14306;InterPro:IPR014729;InterPro:IPR015947
GO:0004784	PARKENT|GeneID=OUR12_008729-T1|Product=hypothetical protein|Dbxref=InterPro:IPR001189;InterPro:IPR000892;InterPro:IPR038551;InterPro:IPR036314;InterPro:IPR019831;PFAM:PF01283;PFAM:PF02777;InterPro:IPR036324;InterPro:IPR019832;InterPro:IPR047864;PFAM:PF00081,PARKENT|GeneID=OUR12_016385-T1|Product=Superoxide dismutase [Fe] 3, chloroplastic|Dbxref=InterPro:IPR001189;InterPro:IPR036314;InterPro:IPR01…
GO:0004788	PARKENT|GeneID=OUR12_009795-T1|Product=cAMP-dependent protein kinase subunit|Dbxref=PFAM:PF04263;InterPro:IPR036371;PFAM:PF04265;InterPro:IPR007373;InterPro:IPR036759;InterPro:IPR007371;InterPro:IPR006282
GO:0004789	PARKENT|GeneID=OUR12_018975-T1|Product=beta ketoadipyl CoA thiolase, th1|Dbxref=InterPro:IPR013785;InterPro:IPR013749;PFAM:PF08543;InterPro:IPR034291;InterPro:IPR029056;PFAM:PF02581;InterPro:IPR004399;InterPro:IPR022998;InterPro:IPR036206
GO:0004791	PARKENT|GeneID=OUR12_000887-T1|Product=hypothetical protein|Dbxref=InterPro:IPR036249;InterPro:IPR046349;InterPro:IPR052259;InterPro:IPR013766;InterPro:IPR045870;PFAM:PF08534;PFAM:PF13098;PFAM:PF00578;PFAM:PF03107;InterPro:IPR017937;PFAM:PF13905;InterPro:IPR012336;InterPro:IPR004146,PARKENT|GeneID=OUR12_000892-T1|Product=hypothetical protein|Dbxref=InterPro:IPR036249;InterPro:IPR046349;InterPro:I…
GO:0004792	PARKENT|GeneID=OUR12_029639-T1|Product=Adenylyltransferase and sulfurtransferase MOCS3|Dbxref=InterPro:IPR028885;InterPro:IPR045886;InterPro:IPR036873;InterPro:IPR035985;PFAM:PF00581;InterPro:IPR000594;InterPro:IPR001763;PFAM:PF00899,PARKENT|GeneID=OUR12_030263-T1|Product=threonyl-tRNA synthetase|Dbxref=InterPro:IPR036873;PFAM:PF00581;InterPro:IPR045078;InterPro:IPR001763;InterPro:IPR001307
GO:0004794	PARKENT|GeneID=OUR12_013224-T1|Product=Threonine dehydratase biosynthetic, chloroplastic|Dbxref=InterPro:IPR045865;InterPro:IPR000634;InterPro:IPR005787;PFAM:PF00291;InterPro:IPR036052;InterPro:IPR038110;InterPro:IPR001721;InterPro:IPR001926;InterPro:IPR050147;PFAM:PF00585
GO:0004795	PARKENT|GeneID=OUR12_004943-T1|Product=hypothetical protein|Dbxref=InterPro:IPR000634;PFAM:PF00291;InterPro:IPR036052;InterPro:IPR004450;InterPro:IPR001926;InterPro:IPR050214,PARKENT|GeneID=OUR12_016643-T1|Product=MT organizer Mto2|Dbxref=InterPro:IPR000634;PFAM:PF00291;InterPro:IPR036052;InterPro:IPR004450;InterPro:IPR001926;InterPro:IPR050214
GO:0004797	PARKENT|GeneID=OUR12_015310-T1|Product=hypothetical protein|Dbxref=InterPro:IPR001267;InterPro:IPR027417;PFAM:PF00265;InterPro:IPR020633,PARKENT|GeneID=OUR12_018470-T1|Product=hypothetical protein|Dbxref=InterPro:IPR001267;InterPro:IPR027417;PFAM:PF00265;InterPro:IPR020633
GO:0004798	PARKENT|GeneID=OUR12_022292-T1|Product=dTMP kinase|Dbxref=InterPro:IPR018094;InterPro:IPR027417;InterPro:IPR039430;PFAM:PF02223;InterPro:IPR018095
GO:0004799	PARKENT|GeneID=OUR12_027793-T1|Product=hypothetical protein|Dbxref=InterPro:IPR023451;InterPro:IPR017925;InterPro:IPR045097;InterPro:IPR024072;InterPro:IPR020940;InterPro:IPR001796;InterPro:IPR000398;PFAM:PF00186;PFAM:PF00303;InterPro:IPR036926,PARKENT|GeneID=OUR12_028501-T1|Product=hypothetical protein|Dbxref=InterPro:IPR023451;InterPro:IPR045097;InterPro:IPR001796;InterPro:IPR024072;InterPro:IP…
GO:0004801	PARKENT|GeneID=OUR12_001767-T1|Product=hypothetical protein|Dbxref=InterPro:IPR046357;InterPro:IPR004732;InterPro:IPR044208;PFAM:PF00254;InterPro:IPR013785;InterPro:IPR018225;InterPro:IPR001179;InterPro:IPR001585;PFAM:PF00923,PARKENT|GeneID=OUR12_002421-T1|Product=hypothetical protein|Dbxref=InterPro:IPR004730;InterPro:IPR001585;InterPro:IPR013785;PFAM:PF00923
GO:0004802	PARKENT|GeneID=OUR12_019819-T1|Product=hypothetical protein|Dbxref=InterPro:IPR033247;PFAM:PF00456;InterPro:IPR009014;PFAM:PF22613;PFAM:PF02780;InterPro:IPR005474;PFAM:PF02779;PFAM:PF00676;InterPro:IPR029061;InterPro:IPR005475;InterPro:IPR005478,PARKENT|GeneID=OUR12_023491-T1|Product=hypothetical protein|Dbxref=InterPro:IPR033247;PFAM:PF00456;InterPro:IPR009014;InterPro:IPR049557;InterPro:IPR0208…
GO:0004805	PARKENT|GeneID=OUR12_000648-T1|Product=Alpha,alpha-trehalose-phosphate synthase [UDP-forming] 6|Dbxref=InterPro:IPR006379;PFAM:PF00982;InterPro:IPR023214;InterPro:IPR036412;PFAM:PF02358;InterPro:IPR001830;InterPro:IPR003337,PARKENT|GeneID=OUR12_000956-T1|Product=Probable alpha,alpha-trehalose-phosphate synthase [UDP-forming] 10|Dbxref=InterPro:IPR006379;PFAM:PF00982;InterPro:IPR023214;InterPro:IP…
GO:0004806	PARKENT|GeneID=OUR12_011463-T1|Product=hypothetical protein|Dbxref=PFAM:PF01764;InterPro:IPR002921;InterPro:IPR029058;InterPro:IPR044819,PARKENT|GeneID=OUR12_011464-T1|Product=hypothetical protein|Dbxref=PFAM:PF01764;InterPro:IPR002921;InterPro:IPR029058;InterPro:IPR044819,PARKENT|GeneID=OUR12_011465-T1|Product=hypothetical protein|Dbxref=PFAM:PF01764;InterPro:IPR002921;InterPro:IPR029058;InterPr…
GO:0004807	PARKENT|GeneID=OUR12_003257-T1|Product=Triosephosphate isomerase, cytosolic|Dbxref=InterPro:IPR013785;InterPro:IPR000652;InterPro:IPR020861;InterPro:IPR035990;InterPro:IPR022896;PFAM:PF00121,PARKENT|GeneID=OUR12_008385-T1|Product=hypothetical protein|Dbxref=InterPro:IPR013785;InterPro:IPR000652;InterPro:IPR020861;InterPro:IPR035990;InterPro:IPR022896;PFAM:PF00121,PARKENT|GeneID=OUR12_019509-T1|Pr…
GO:0004809	PARKENT|GeneID=OUR12_022003-T1|Product=hypothetical protein|Dbxref=InterPro:IPR029063;InterPro:IPR042296;InterPro:IPR002905;PFAM:PF02005
GO:0004812	PARKENT|GeneID=OUR12_000244-T1|Product=hypothetical protein|Dbxref=PFAM:PF07973;InterPro:IPR002318;PFAM:PF02272;InterPro:IPR045864;InterPro:IPR018165;InterPro:IPR003156;InterPro:IPR018163;InterPro:IPR009000;InterPro:IPR023033;InterPro:IPR012947;InterPro:IPR018162;PFAM:PF01411;InterPro:IPR050058;InterPro:IPR018164,PARKENT|GeneID=OUR12_000401-T1|Product=Glutamine--tRNA ligase, cytoplasmic|Dbxref=In…
GO:0004813	PARKENT|GeneID=OUR12_000244-T1|Product=hypothetical protein|Dbxref=PFAM:PF07973;InterPro:IPR002318;PFAM:PF02272;InterPro:IPR045864;InterPro:IPR018165;InterPro:IPR003156;InterPro:IPR018163;InterPro:IPR009000;InterPro:IPR023033;InterPro:IPR012947;InterPro:IPR018162;PFAM:PF01411;InterPro:IPR050058;InterPro:IPR018164,PARKENT|GeneID=OUR12_003411-T1|Product=hypothetical protein|Dbxref=PFAM:PF07973;Inte…
GO:0004814	PARKENT|GeneID=OUR12_016780-T1|Product=hypothetical protein|Dbxref=PFAM:PF00750;InterPro:IPR005148;PFAM:PF05746;InterPro:IPR001412;InterPro:IPR009080;PFAM:PF03485;InterPro:IPR036695;InterPro:IPR014729;InterPro:IPR008909;InterPro:IPR035684;InterPro:IPR001278
GO:0004815	PARKENT|GeneID=OUR12_003965-T1|Product=hypothetical protein|Dbxref=InterPro:IPR004364;InterPro:IPR004365;InterPro:IPR012340;InterPro:IPR045864;PFAM:PF01336;InterPro:IPR047090;InterPro:IPR002312;PFAM:PF00152;InterPro:IPR047089;InterPro:IPR006195;InterPro:IPR004524;InterPro:IPR029351;PFAM:PF02938;InterPro:IPR004115,PARKENT|GeneID=OUR12_004625-T1|Product=Aspartate--tRNA ligase 2, cytoplasmic|Dbxref=…
GO:0004816	PARKENT|GeneID=OUR12_002472-T1|Product=hypothetical protein|Dbxref=InterPro:IPR004364;InterPro:IPR012340;InterPro:IPR045864;InterPro:IPR002312;PFAM:PF00152;InterPro:IPR006195,PARKENT|GeneID=OUR12_010686-T1|Product=Viral Genome polyprotein|Dbxref=InterPro:IPR004364;InterPro:IPR045864;InterPro:IPR004522;PFAM:PF00152,PARKENT|GeneID=OUR12_016748-T1|Product=Asparagine--tRNA ligase, cytoplasmic 1|Dbxre…
GO:0004817	PARKENT|GeneID=OUR12_004986-T1|Product=hypothetical protein|Dbxref=InterPro:IPR015803;InterPro:IPR032678;InterPro:IPR009080;PFAM:PF23493;InterPro:IPR014729;InterPro:IPR024909;InterPro:IPR015273,PARKENT|GeneID=OUR12_015603-T1|Product=hypothetical protein|Dbxref=InterPro:IPR015803;InterPro:IPR032678;InterPro:IPR009080;PFAM:PF23493;InterPro:IPR014729;PFAM:PF01406;InterPro:IPR024909,PARKENT|GeneID=OU…
GO:0004818	PARKENT|GeneID=OUR12_003479-T1|Product=Glutamate--tRNA ligase, chloroplastic/mitochondrial|Dbxref=InterPro:IPR033910;InterPro:IPR045462;InterPro:IPR001412;InterPro:IPR000924;InterPro:IPR049940;InterPro:IPR014729;PFAM:PF19269;InterPro:IPR004527;InterPro:IPR020058;InterPro:IPR020751;InterPro:IPR008925;PFAM:PF00749,PARKENT|GeneID=OUR12_020832-T1|Product=hypothetical protein|Dbxref=InterPro:IPR020059…
GO:0004819	PARKENT|GeneID=OUR12_000401-T1|Product=Glutamine--tRNA ligase, cytoplasmic|Dbxref=InterPro:IPR020059;InterPro:IPR000924;PFAM:PF04558;InterPro:IPR020058;InterPro:IPR042558;PFAM:PF03950;InterPro:IPR014729;InterPro:IPR007638;InterPro:IPR004514;InterPro:IPR011035;PFAM:PF20974;InterPro:IPR007639;InterPro:IPR050132;InterPro:IPR049437;PFAM:PF00749;InterPro:IPR001412;InterPro:IPR020056;InterPro:IPR042559…
GO:0004820	PARKENT|GeneID=OUR12_001761-T1|Product=hypothetical protein|Dbxref=InterPro:IPR045864;InterPro:IPR027031,PARKENT|GeneID=OUR12_001762-T1|Product=hypothetical protein|Dbxref=PFAM:PF00587;InterPro:IPR027031;InterPro:IPR002314;InterPro:IPR036621;InterPro:IPR002315;InterPro:IPR045864;InterPro:IPR004154;InterPro:IPR033731;InterPro:IPR006195;PFAM:PF03129,PARKENT|GeneID=OUR12_003669-T1|Product=hypothetic…
GO:0004821	PARKENT|GeneID=OUR12_007560-T1|Product=hypothetical protein|Dbxref=InterPro:IPR045864,PARKENT|GeneID=OUR12_012508-T1|Product=hypothetical protein|Dbxref=InterPro:IPR036621;InterPro:IPR045864;InterPro:IPR004154;InterPro:IPR041715;InterPro:IPR004516;PFAM:PF03129,PARKENT|GeneID=OUR12_028868-T1|Product=hypothetical protein|Dbxref=PFAM:PF13393;InterPro:IPR036621;InterPro:IPR045864;InterPro:IPR004154;I…
GO:0004822	PARKENT|GeneID=OUR12_006420-T1|Product=Isoleucine--tRNA ligase, chloroplastic/mitochondrial|Dbxref=InterPro:IPR050081;InterPro:IPR001412;InterPro:IPR009008;InterPro:IPR033708;InterPro:IPR002301;InterPro:IPR009080;InterPro:IPR013155;InterPro:IPR010663;PFAM:PF06827;InterPro:IPR014729;InterPro:IPR023585;PFAM:PF08264;InterPro:IPR002300,PARKENT|GeneID=OUR12_007534-T1|Product=hypothetical protein|Dbxre…
GO:0004823	PARKENT|GeneID=OUR12_010510-T1|Product=hypothetical protein|Dbxref=InterPro:IPR014729;InterPro:IPR002302,PARKENT|GeneID=OUR12_014735-T1|Product=hypothetical protein|Dbxref=InterPro:IPR014729;InterPro:IPR002300;InterPro:IPR002302,PARKENT|GeneID=OUR12_014736-T1|Product=hypothetical protein|Dbxref=InterPro:IPR014729;InterPro:IPR002300;InterPro:IPR002302,PARKENT|GeneID=OUR12_015032-T1|Product=hypothe…
GO:0004824	PARKENT|GeneID=OUR12_007848-T1|Product=Lysine--tRNA ligase, chloroplastic/mitochondrial|Dbxref=InterPro:IPR004365;InterPro:IPR004364;InterPro:IPR012340;InterPro:IPR044136;InterPro:IPR045864;PFAM:PF01336;InterPro:IPR018149;InterPro:IPR002313;PFAM:PF00152;InterPro:IPR006195,PARKENT|GeneID=OUR12_021072-T1|Product=hypothetical protein|Dbxref=InterPro:IPR012340,PARKENT|GeneID=OUR12_021073-T1|Product=h…
GO:0004825	PARKENT|GeneID=OUR12_007286-T1|Product=hypothetical protein|Dbxref=InterPro:IPR014758;InterPro:IPR001412;InterPro:IPR023458;PFAM:PF00133;InterPro:IPR014729;InterPro:IPR029038;PFAM:PF09334;InterPro:IPR033911;InterPro:IPR015413,PARKENT|GeneID=OUR12_007287-T1|Product=hypothetical protein|Dbxref=InterPro:IPR012340;InterPro:IPR041872;InterPro:IPR009080;InterPro:IPR023458;PFAM:PF19303;PFAM:PF01588;Inte…
GO:0004826	PARKENT|GeneID=OUR12_003562-T1|Product=hypothetical protein|Dbxref=InterPro:IPR006195;InterPro:IPR040725;InterPro:IPR045864;InterPro:IPR002319;InterPro:IPR004529;InterPro:IPR040724;PFAM:PF18553;PFAM:PF18552;PFAM:PF01409,PARKENT|GeneID=OUR12_017500-T1|Product=hypothetical protein|Dbxref=InterPro:IPR004530;InterPro:IPR045864;InterPro:IPR002319;PFAM:PF03147;InterPro:IPR006195;InterPro:IPR005121;Inte…
GO:0004827	PARKENT|GeneID=OUR12_010069-T1|Product=hypothetical protein|Dbxref=PFAM:PF00587;InterPro:IPR002316;InterPro:IPR004499;InterPro:IPR002314;InterPro:IPR017449;InterPro:IPR036621;InterPro:IPR033721;InterPro:IPR045864;InterPro:IPR004154;InterPro:IPR016061;PFAM:PF09180;InterPro:IPR006195;PFAM:PF03129,PARKENT|GeneID=OUR12_024861-T1|Product=Proline--tRNA ligase, chloroplastic/mitochondrial|Dbxref=PFAM:PF…
GO:0004828	PARKENT|GeneID=OUR12_011839-T1|Product=Serine--tRNA ligase, chloroplastic/mitochondrial|Dbxref=PFAM:PF00587;PFAM:PF02403;InterPro:IPR033729;InterPro:IPR042103;InterPro:IPR002314;InterPro:IPR010978;InterPro:IPR015866;InterPro:IPR045864;InterPro:IPR002317;InterPro:IPR006195,PARKENT|GeneID=OUR12_021130-T1|Product=hypothetical protein|Dbxref=PFAM:PF00587;PFAM:PF02403;InterPro:IPR033729;InterPro:IPR00…
GO:0004829	PARKENT|GeneID=OUR12_000963-T1|Product=hypothetical protein|Dbxref=InterPro:IPR004095;InterPro:IPR018163;PFAM:PF02824;InterPro:IPR012675;InterPro:IPR012676,PARKENT|GeneID=OUR12_000965-T1|Product=hypothetical protein|Dbxref=PFAM:PF00587;InterPro:IPR033728;PFAM:PF07973;InterPro:IPR002314;InterPro:IPR036621;InterPro:IPR045864;InterPro:IPR047246;InterPro:IPR004154;InterPro:IPR002320;InterPro:IPR01816…
GO:0004830	PARKENT|GeneID=OUR12_004320-T1|Product=Tryptophan--tRNA ligase, chloroplastic/mitochondrial|Dbxref=InterPro:IPR050203;InterPro:IPR002305;InterPro:IPR001412;InterPro:IPR014729;PFAM:PF00579;InterPro:IPR002306,PARKENT|GeneID=OUR12_004321-T1|Product=hypothetical protein|Dbxref=InterPro:IPR050203,PARKENT|GeneID=OUR12_018069-T1|Product=hypothetical protein|Dbxref=InterPro:IPR002305;InterPro:IPR001412;I…
GO:0004831	PARKENT|GeneID=OUR12_002180-T1|Product=hypothetical protein|Dbxref=InterPro:IPR002305;InterPro:IPR050489;InterPro:IPR023617;InterPro:IPR014729;PFAM:PF00579,PARKENT|GeneID=OUR12_021509-T1|Product=hypothetical protein|Dbxref=InterPro:IPR024107;InterPro:IPR002942;InterPro:IPR036986;InterPro:IPR002305;InterPro:IPR001412;InterPro:IPR054608;InterPro:IPR014729;PFAM:PF01479;PFAM:PF00579;InterPro:IPR02408…
GO:0004832	PARKENT|GeneID=OUR12_002800-T1|Product=Valine--tRNA ligase, mitochondrial 1|Dbxref=InterPro:IPR009008;InterPro:IPR002303;InterPro:IPR025709,PARKENT|GeneID=OUR12_002803-T1|Product=Valine--tRNA ligase, mitochondrial 1|Dbxref=InterPro:IPR009008;InterPro:IPR002303;InterPro:IPR025709,PARKENT|GeneID=OUR12_021644-T1|Product=hypothetical protein|Dbxref=InterPro:IPR014729;InterPro:IPR002303;InterPro:IPR00…
GO:0004834	PARKENT|GeneID=OUR12_009468-T1|Product=cTPxI|Dbxref=InterPro:IPR013785;PFAM:PF00290;InterPro:IPR018204;InterPro:IPR011060;InterPro:IPR002028,PARKENT|GeneID=OUR12_021922-T1|Product=Tryptophan synthase beta chain 2|Dbxref=InterPro:IPR006653;PFAM:PF00291;InterPro:IPR023026;InterPro:IPR006654;InterPro:IPR036052;InterPro:IPR006316;InterPro:IPR001926,PARKENT|GeneID=OUR12_029541-T1|Product=tryptophan sy…
GO:0004838	PARKENT|GeneID=OUR12_018051-T1|Product=zinc-finger protein|Dbxref=InterPro:IPR004838;InterPro:IPR004839;PFAM:PF00155;InterPro:IPR015422;InterPro:IPR015424;InterPro:IPR015421;InterPro:IPR005958,PARKENT|GeneID=OUR12_018052-T1|Product=zinc-finger protein|Dbxref=InterPro:IPR004839;PFAM:PF00155;InterPro:IPR015422;InterPro:IPR015424;InterPro:IPR015421;InterPro:IPR005958,PARKENT|GeneID=OUR12_018055-T1|P…
GO:0004839	PARKENT|GeneID=OUR12_008635-T1|Product=E1 ubiquitin-activating protein|Dbxref=InterPro:IPR045886;InterPro:IPR000011;InterPro:IPR000594;InterPro:IPR042063;InterPro:IPR035985;PFAM:PF10585;InterPro:IPR018075;PFAM:PF09358;InterPro:IPR032420;PFAM:PF16191;PFAM:PF00899;PFAM:PF16190;InterPro:IPR042449;InterPro:IPR038252;InterPro:IPR032418;InterPro:IPR033127;InterPro:IPR018074;InterPro:IPR018965;InterPro:…
GO:0004842	PARKENT|GeneID=OUR12_000012-T1|Product=hypothetical protein|Dbxref=PFAM:PF13445;InterPro:IPR013083;PFAM:PF13923;PFAM:PF12678;PFAM:PF13639;PFAM:PF12861;InterPro:IPR001841;PFAM:PF00097,PARKENT|GeneID=OUR12_000494-T1|Product=hypothetical protein|Dbxref=InterPro:IPR011016;InterPro:IPR022143;InterPro:IPR013083;InterPro:IPR033275,PARKENT|GeneID=OUR12_000519-T1|Product=U-box domain-containing protein 11…
GO:0004843	PARKENT|GeneID=OUR12_001537-T1|Product=OVARIAN TUMOR DOMAIN-containing deubiquitinating enzyme 4|Dbxref=InterPro:IPR003323;PFAM:PF02338;InterPro:IPR038765;InterPro:IPR047947,PARKENT|GeneID=OUR12_001756-T1|Product=ubiquitin-specific protease otu1|Dbxref=InterPro:IPR003323;InterPro:IPR042467;InterPro:IPR019400;InterPro:IPR038765;InterPro:IPR042468;PFAM:PF10275,PARKENT|GeneID=OUR12_002107-T1|Product…
GO:0004844	PARKENT|GeneID=OUR12_001356-T1|Product=hypothetical protein|Dbxref=InterPro:IPR005122;InterPro:IPR002043;InterPro:IPR018085;InterPro:IPR036895;PFAM:PF03167
GO:0004846	PARKENT|GeneID=OUR12_020122-T1|Product=hypothetical protein|Dbxref=PFAM:PF01014;InterPro:IPR002042
GO:0004851	PARKENT|GeneID=OUR12_020701-T1|Product=S-adenosyl-L-methionine-dependent uroporphyrinogen III methyltransferase, chloroplastic|Dbxref=PFAM:PF00590;InterPro:IPR000878;InterPro:IPR050161;InterPro:IPR035996;InterPro:IPR014776;InterPro:IPR006366;InterPro:IPR014777;InterPro:IPR003043
GO:0004852	PARKENT|GeneID=OUR12_013742-T1|Product=hypothetical protein|Dbxref=InterPro:IPR003754;PFAM:PF02602;InterPro:IPR036108,PARKENT|GeneID=OUR12_027601-T1|Product=hypothetical protein|Dbxref=InterPro:IPR003754;PFAM:PF02602;InterPro:IPR039793;InterPro:IPR036108
GO:0004853	PARKENT|GeneID=OUR12_019330-T1|Product=hypothetical protein|Dbxref=PFAM:PF01208;InterPro:IPR038071;InterPro:IPR000257;InterPro:IPR006361,PARKENT|GeneID=OUR12_029117-T1|Product=Uroporphyrinogen decarboxylase 1, chloroplastic|Dbxref=PFAM:PF01208;InterPro:IPR038071;InterPro:IPR000257;InterPro:IPR006361
GO:0004856	PARKENT|GeneID=OUR12_027307-T1|Product=Xylulose kinase 2|Dbxref=PFAM:PF00370;InterPro:IPR042024;InterPro:IPR043129;InterPro:IPR000577;InterPro:IPR018484;InterPro:IPR018485
GO:0004857	PARKENT|GeneID=OUR12_000587-T1|Product=hypothetical protein|Dbxref=InterPro:IPR006501;InterPro:IPR033131;InterPro:IPR011050;InterPro:IPR035513;PFAM:PF04043;PFAM:PF01095;InterPro:IPR012334;InterPro:IPR000070;InterPro:IPR018040,PARKENT|GeneID=OUR12_000588-T1|Product=hypothetical protein|Dbxref=InterPro:IPR051955;InterPro:IPR035513;PFAM:PF04043;InterPro:IPR006501,PARKENT|GeneID=OUR12_000592-T1|Produ…
GO:0004860	PARKENT|GeneID=OUR12_003803-T1|Product=hypothetical protein|Dbxref=PFAM:PF06658;InterPro:IPR009548
GO:0004861	PARKENT|GeneID=OUR12_003719-T1|Product=hypothetical protein|Dbxref=InterPro:IPR044275;InterPro:IPR003175;PFAM:PF02234;InterPro:IPR044898,PARKENT|GeneID=OUR12_007178-T1|Product=hypothetical protein|Dbxref=InterPro:IPR044275;InterPro:IPR003175;PFAM:PF02234;InterPro:IPR044898,PARKENT|GeneID=OUR12_010427-T1|Product=hypothetical protein|Dbxref=InterPro:IPR044275;InterPro:IPR003175;PFAM:PF02234;InterPr…
GO:0004864	PARKENT|GeneID=OUR12_000974-T1|Product=hypothetical protein|Dbxref=InterPro:IPR024949;InterPro:IPR023393;PFAM:PF10604;InterPro:IPR000916;InterPro:IPR051761;PFAM:PF00407,PARKENT|GeneID=OUR12_001181-T1|Product=hypothetical protein|Dbxref=InterPro:IPR006760;PFAM:PF04667,PARKENT|GeneID=OUR12_002260-T1|Product=hypothetical protein|Dbxref=InterPro:IPR027725;InterPro:IPR007062;InterPro:IPR036390;PFAM:PF…
GO:0004865	PARKENT|GeneID=OUR12_002234-T1|Product=hypothetical protein|Dbxref=PFAM:PF07491;InterPro:IPR011107,PARKENT|GeneID=OUR12_028670-T1|Product=hypothetical protein|Dbxref=PFAM:PF07491;InterPro:IPR011107
GO:0004866	PARKENT|GeneID=OUR12_005150-T1|Product=hypothetical protein|Dbxref=PFAM:PF00197;InterPro:IPR002160;InterPro:IPR011065,PARKENT|GeneID=OUR12_012864-T1|Product=hypothetical protein|Dbxref=PFAM:PF11566;InterPro:IPR021625;InterPro:IPR045128,PARKENT|GeneID=OUR12_017422-T1|Product=hypothetical protein|Dbxref=InterPro:IPR001563;InterPro:IPR002160;PFAM:PF00450;InterPro:IPR029058;InterPro:IPR011065,PARKENT…
GO:0004867	PARKENT|GeneID=OUR12_006825-T1|Product=hypothetical protein|Dbxref=PFAM:PF00280;InterPro:IPR036354;InterPro:IPR000864,PARKENT|GeneID=OUR12_019034-T1|Product=hypothetical protein|Dbxref=PFAM:PF02428;InterPro:IPR003465;InterPro:IPR051391,PARKENT|GeneID=OUR12_019293-T1|Product=hypothetical protein|Dbxref=PFAM:PF00280;InterPro:IPR036354;InterPro:IPR000864,PARKENT|GeneID=OUR12_027621-T1|Product=hypoth…
GO:0004869	PARKENT|GeneID=OUR12_007211-T1|Product=hypothetical protein|Dbxref=InterPro:IPR046350;InterPro:IPR000010;PFAM:PF16845,PARKENT|GeneID=OUR12_008944-T1|Product=hypothetical protein|Dbxref=PFAM:PF16845;InterPro:IPR027214;InterPro:IPR046350;InterPro:IPR000010;InterPro:IPR018073;PFAM:PF00031,PARKENT|GeneID=OUR12_011925-T1|Product=hypothetical protein|Dbxref=InterPro:IPR046350;InterPro:IPR027214;InterPr…
GO:0004888	PARKENT|GeneID=OUR12_004521-T1|Product=glycolytic proteins transcriptional activator gcr1|Dbxref=InterPro:IPR017981;PFAM:PF05462;InterPro:IPR022340;InterPro:IPR022343
GO:0004930	PARKENT|GeneID=OUR12_004521-T1|Product=glycolytic proteins transcriptional activator gcr1|Dbxref=InterPro:IPR017981;PFAM:PF05462;InterPro:IPR022340;InterPro:IPR022343,PARKENT|GeneID=OUR12_005099-T1|Product=hypothetical protein|Dbxref=InterPro:IPR001828;InterPro:IPR028082;InterPro:IPR000337;InterPro:IPR015683,PARKENT|GeneID=OUR12_021254-T1|Product=hypothetical protein|Dbxref=InterPro:IPR018781,PAR…
GO:0005047	PARKENT|GeneID=OUR12_017258-T1|Product=hypothetical protein|Dbxref=PFAM:PF13401;PFAM:PF00448;InterPro:IPR027417;InterPro:IPR000897;InterPro:IPR042101;InterPro:IPR036225;InterPro:IPR011012;PFAM:PF02881;InterPro:IPR013822;PFAM:PF04086;InterPro:IPR003593;InterPro:IPR007222,PARKENT|GeneID=OUR12_023643-T1|Product=hypothetical protein|Dbxref=PFAM:PF00448;InterPro:IPR027417;InterPro:IPR000897;InterPro:I…
GO:0005048	PARKENT|GeneID=OUR12_002494-T1|Product=Protein transport protein Sec61 subunit alpha|Dbxref=PFAM:PF10559;InterPro:IPR023201;InterPro:IPR002208;InterPro:IPR019561;InterPro:IPR030659;PFAM:PF00344,PARKENT|GeneID=OUR12_009581-T1|Product=hypothetical protein|Dbxref=PFAM:PF00344;InterPro:IPR023201;InterPro:IPR002208,PARKENT|GeneID=OUR12_017435-T1|Product=hypothetical protein|Dbxref=InterPro:IPR023201;I…
GO:0005049	PARKENT|GeneID=OUR12_012398-T1|Product=Exportin 7|Dbxref=InterPro:IPR011989;InterPro:IPR001494;InterPro:IPR016024;InterPro:IPR044189;PFAM:PF03810,PARKENT|GeneID=OUR12_012399-T1|Product=hypothetical protein|Dbxref=InterPro:IPR016024;InterPro:IPR044189,PARKENT|GeneID=OUR12_015793-T1|Product=hypothetical protein|Dbxref=InterPro:IPR044189,PARKENT|GeneID=OUR12_020242-T1|Product=hypothetical protein|Db…
GO:0005052	PARKENT|GeneID=OUR12_029901-T1|Product=hypothetical protein|Dbxref=InterPro:IPR024111;PFAM:PF07719;InterPro:IPR019734;PFAM:PF00515;InterPro:IPR011990,PARKENT|GeneID=OUR12_029902-T1|Product=Peroxisomal membrane signal receptor PTS1|Dbxref=InterPro:IPR024111
GO:0005053	PARKENT|GeneID=OUR12_015767-T1|Product=hypothetical protein|Dbxref=InterPro:IPR036322;InterPro:IPR044536;InterPro:IPR020472;InterPro:IPR019775;PFAM:PF00400;InterPro:IPR001680;InterPro:IPR015943
GO:0005080	PARKENT|GeneID=OUR12_025553-T1|Product=Guanine nucleotide-binding protein subunit beta|Dbxref=InterPro:IPR036322;InterPro:IPR020472;InterPro:IPR019775;InterPro:IPR045223;PFAM:PF00400;InterPro:IPR001680;InterPro:IPR015943
GO:0005085	PARKENT|GeneID=OUR12_000549-T1|Product=hypothetical protein|Dbxref=InterPro:IPR045260;PFAM:PF00400;InterPro:IPR001680;InterPro:IPR011047;InterPro:IPR015943,PARKENT|GeneID=OUR12_001132-T1|Product=hypothetical protein|Dbxref=InterPro:IPR007681;PFAM:PF04603;InterPro:IPR016123,PARKENT|GeneID=OUR12_002774-T1|Product=hypothetical protein|Dbxref=PFAM:PF12783;InterPro:IPR000904;InterPro:IPR032691;InterPr…
GO:0005086	PARKENT|GeneID=OUR12_008179-T1|Product=hypothetical protein|Dbxref=InterPro:IPR030671;PFAM:PF03911;InterPro:IPR016482,PARKENT|GeneID=OUR12_019773-T1|Product=hypothetical protein|Dbxref=InterPro:IPR030671;PFAM:PF03911;InterPro:IPR016482,PARKENT|GeneID=OUR12_023439-T1|Product=hypothetical protein|Dbxref=InterPro:IPR030671;PFAM:PF03911;InterPro:IPR016482
GO:0005092	PARKENT|GeneID=OUR12_005860-T1|Product=hypothetical protein|Dbxref=PFAM:PF22603;InterPro:IPR001738;InterPro:IPR018203;InterPro:IPR036188,PARKENT|GeneID=OUR12_007793-T1|Product=Rab GDP dissociation inhibitor beta|Dbxref=InterPro:IPR000806;InterPro:IPR018203;PFAM:PF00996;InterPro:IPR036188,PARKENT|GeneID=OUR12_011125-T1|Product=hypothetical protein|Dbxref=InterPro:IPR000806;PFAM:PF01593;InterPro:IP…
GO:0005093	PARKENT|GeneID=OUR12_007793-T1|Product=Rab GDP dissociation inhibitor beta|Dbxref=InterPro:IPR000806;InterPro:IPR018203;PFAM:PF00996;InterPro:IPR036188,PARKENT|GeneID=OUR12_011125-T1|Product=hypothetical protein|Dbxref=InterPro:IPR000806;PFAM:PF01593;InterPro:IPR018203;PFAM:PF00996;InterPro:IPR036188
GO:0005094	PARKENT|GeneID=OUR12_007357-T1|Product=hypothetical protein|Dbxref=PFAM:PF02115;InterPro:IPR014756;InterPro:IPR024792;InterPro:IPR000406,PARKENT|GeneID=OUR12_010209-T1|Product=hypothetical protein|Dbxref=PFAM:PF02115;InterPro:IPR014756;InterPro:IPR024792;InterPro:IPR000406,PARKENT|GeneID=OUR12_015186-T1|Product=Rab GDP dissociation inhibitor alpha|Dbxref=PFAM:PF02115;InterPro:IPR014756;InterPro:I…
GO:0005096	PARKENT|GeneID=OUR12_000549-T1|Product=hypothetical protein|Dbxref=InterPro:IPR045260;PFAM:PF00400;InterPro:IPR001680;InterPro:IPR011047;InterPro:IPR015943,PARKENT|GeneID=OUR12_001369-T1|Product=hypothetical protein|Dbxref=InterPro:IPR035969;InterPro:IPR000195,PARKENT|GeneID=OUR12_001389-T1|Product=ADP-ribosylation factor GTPase-activating protein agd4|Dbxref=InterPro:IPR001164;InterPro:IPR002110…
GO:0005102	PARKENT|GeneID=OUR12_026201-T1|Product=hypothetical protein|Dbxref=PFAM:PF23020;PFAM:PF17733;InterPro:IPR054154;PFAM:PF04695;InterPro:IPR025655;InterPro:IPR006785;InterPro:IPR036388
GO:0005179	PARKENT|GeneID=OUR12_011512-T1|Product=hypothetical protein|Dbxref=InterPro:IPR033250,PARKENT|GeneID=OUR12_011513-T1|Product=hypothetical protein|Dbxref=InterPro:IPR033250,PARKENT|GeneID=OUR12_011514-T1|Product=hypothetical protein|Dbxref=InterPro:IPR033250,PARKENT|GeneID=OUR12_011515-T1|Product=hypothetical protein|Dbxref=InterPro:IPR033250,PARKENT|GeneID=OUR12_011516-T1|Product=hypothetical pro…
GO:0005198	PARKENT|GeneID=OUR12_001205-T1|Product=26S proteasome regulatory subunit rpn6|Dbxref=PFAM:PF01399;InterPro:IPR040780;InterPro:IPR000717;InterPro:IPR036390;InterPro:IPR040773;PFAM:PF18503;InterPro:IPR011990;PFAM:PF18055;InterPro:IPR050871,PARKENT|GeneID=OUR12_001222-T1|Product=hypothetical protein|Dbxref=InterPro:IPR000996,PARKENT|GeneID=OUR12_001952-T1|Product=epoxide hydrolase, soluble (sEH)|Dbx…
GO:0005200	PARKENT|GeneID=OUR12_000589-T1|Product=hypothetical protein|Dbxref=InterPro:IPR034666;InterPro:IPR007188,PARKENT|GeneID=OUR12_000591-T1|Product=Actin-related protein 2/3 complex subunit 2A|Dbxref=PFAM:PF04045;InterPro:IPR034666;InterPro:IPR007188,PARKENT|GeneID=OUR12_002186-T1|Product=hypothetical protein|Dbxref=InterPro:IPR002453;InterPro:IPR008280;InterPro:IPR017975;InterPro:IPR003008;PFAM:PF00…
GO:0005215	PARKENT|GeneID=OUR12_000152-T1|Product=serine/threonine protein kinase Ran1|Dbxref=PFAM:PF00702;InterPro:IPR008250;InterPro:IPR027256;InterPro:IPR023299;InterPro:IPR001757;InterPro:IPR023214;InterPro:IPR017969;InterPro:IPR036412;InterPro:IPR006121;PFAM:PF00122;InterPro:IPR036163;InterPro:IPR018303;PFAM:PF00403;InterPro:IPR023298;InterPro:IPR044492;InterPro:IPR006122,PARKENT|GeneID=OUR12_000269-T1…
GO:0005216	PARKENT|GeneID=OUR12_004777-T1|Product=hypothetical protein|Dbxref=PFAM:PF07885;InterPro:IPR045319;InterPro:IPR018490;PFAM:PF00520;InterPro:IPR003938;InterPro:IPR005821;InterPro:IPR014710;PFAM:PF00027;InterPro:IPR000595,PARKENT|GeneID=OUR12_004832-T1|Product=RAC-alpha serine/threonine-protein kinase|Dbxref=PFAM:PF11834;PFAM:PF07885;InterPro:IPR045319;InterPro:IPR018490;InterPro:IPR002110;InterPro…
GO:0005227	PARKENT|GeneID=OUR12_002900-T1|Product=hypothetical protein|Dbxref=InterPro:IPR045122;PFAM:PF02714;InterPro:IPR003864;InterPro:IPR027815;InterPro:IPR032880;PFAM:PF14703;PFAM:PF13967,PARKENT|GeneID=OUR12_004095-T1|Product=hypothetical protein|Dbxref=InterPro:IPR045122;InterPro:IPR003864;PFAM:PF02714,PARKENT|GeneID=OUR12_005776-T1|Product=hypothetical protein|Dbxref=InterPro:IPR045122;PFAM:PF02714;…
GO:0005245	PARKENT|GeneID=OUR12_018099-T1|Product=hypothetical protein|Dbxref=PFAM:PF00520;InterPro:IPR044581;InterPro:IPR005821
GO:0005247	PARKENT|GeneID=OUR12_003496-T1|Product=hypothetical protein|Dbxref=InterPro:IPR046342;InterPro:IPR050368;PFAM:PF00571;InterPro:IPR001807;InterPro:IPR000644;InterPro:IPR014743,PARKENT|GeneID=OUR12_003497-T1|Product=hypothetical protein|Dbxref=InterPro:IPR050368;InterPro:IPR001807;InterPro:IPR014743,PARKENT|GeneID=OUR12_006597-T1|Product=hypothetical protein|Dbxref=InterPro:IPR046342;InterPro:IPR00…
GO:0005249	PARKENT|GeneID=OUR12_004777-T1|Product=hypothetical protein|Dbxref=PFAM:PF07885;InterPro:IPR045319;InterPro:IPR018490;PFAM:PF00520;InterPro:IPR003938;InterPro:IPR005821;InterPro:IPR014710;PFAM:PF00027;InterPro:IPR000595,PARKENT|GeneID=OUR12_004832-T1|Product=RAC-alpha serine/threonine-protein kinase|Dbxref=PFAM:PF11834;PFAM:PF07885;InterPro:IPR045319;InterPro:IPR018490;InterPro:IPR002110;InterPro…
GO:0005254	PARKENT|GeneID=OUR12_013998-T1|Product=hypothetical protein|Dbxref=InterPro:IPR007632;PFAM:PF04547;InterPro:IPR049452,PARKENT|GeneID=OUR12_024009-T1|Product=Voltage-dependent chloride channel 1, chloroplastic|Dbxref=PFAM:PF25539;InterPro:IPR021134;InterPro:IPR044669
GO:0005261	PARKENT|GeneID=OUR12_021188-T1|Product=hypothetical protein|Dbxref=PFAM:PF24874;InterPro:IPR027272;PFAM:PF12166;InterPro:IPR031334;PFAM:PF25288
GO:0005262	PARKENT|GeneID=OUR12_005439-T1|Product=hypothetical protein|Dbxref=InterPro:IPR006769;PFAM:PF04678;InterPro:IPR039055,PARKENT|GeneID=OUR12_008775-T1|Product=hypothetical protein|Dbxref=InterPro:IPR006769;PFAM:PF04678;InterPro:IPR039055,PARKENT|GeneID=OUR12_008776-T1|Product=hypothetical protein|Dbxref=InterPro:IPR039055,PARKENT|GeneID=OUR12_013483-T1|Product=hypothetical protein|Dbxref=InterPro:I…
GO:0005267	PARKENT|GeneID=OUR12_010081-T1|Product=serine/threonine protein kinase|Dbxref=InterPro:IPR018247;PFAM:PF07885;InterPro:IPR013099;InterPro:IPR003280;InterPro:IPR011992,PARKENT|GeneID=OUR12_015236-T1|Product=hypothetical protein|Dbxref=PFAM:PF07885;InterPro:IPR013099;InterPro:IPR002048;InterPro:IPR003280;InterPro:IPR011992,PARKENT|GeneID=OUR12_015923-T1|Product=hypothetical protein|Dbxref=PFAM:PF07…
GO:0005274	PARKENT|GeneID=OUR12_000060-T1|Product=Phospholipid metabolism protein|Dbxref=PFAM:PF07168;InterPro:IPR030189;InterPro:IPR009834
GO:0005313	PARKENT|GeneID=OUR12_000127-T1|Product=Catabolite repression protein cat5|Dbxref=PFAM:PF13520;InterPro:IPR029485;PFAM:PF13906;InterPro:IPR002293;PFAM:PF00324,PARKENT|GeneID=OUR12_000450-T1|Product=hypothetical protein|Dbxref=InterPro:IPR051123;InterPro:IPR004840;InterPro:IPR002293,PARKENT|GeneID=OUR12_000451-T1|Product=Mitochondrial branched-chain amino acid (BCAA) aminotransferase|Dbxref=InterPr…
GO:0005315	PARKENT|GeneID=OUR12_003466-T1|Product=Mitochondrial phosphate carrier protein 1, mitochondrial|Dbxref=InterPro:IPR023395;PFAM:PF00153;InterPro:IPR018108;InterPro:IPR044677,PARKENT|GeneID=OUR12_006898-T1|Product=Inorganic phosphate transporter 1-4|Dbxref=InterPro:IPR020846;InterPro:IPR036259;InterPro:IPR005828;PFAM:PF07690;PFAM:PF00083;InterPro:IPR004738,PARKENT|GeneID=OUR12_006900-T1|Product=Ino…
GO:0005319	PARKENT|GeneID=OUR12_007630-T1|Product=Protein TRIGALACTOSYLDIACYLGLYCEROL 2, chloroplastic|Dbxref=InterPro:IPR039342,PARKENT|GeneID=OUR12_007631-T1|Product=Protein TRIGALACTOSYLDIACYLGLYCEROL 2, chloroplastic|Dbxref=InterPro:IPR003399;PFAM:PF02470;InterPro:IPR039342,PARKENT|GeneID=OUR12_013697-T1|Product=Phospholipid-transporting ATPase abca1|Dbxref=InterPro:IPR027417;InterPro:IPR003439;InterPro…
GO:0005324	PARKENT|GeneID=OUR12_010992-T1|Product=hypothetical protein|Dbxref=InterPro:IPR050835;InterPro:IPR011527,PARKENT|GeneID=OUR12_010993-T1|Product=ATP-binding cassette sub- D member 1|Dbxref=InterPro:IPR050835;InterPro:IPR011527;InterPro:IPR036640;PFAM:PF06472,PARKENT|GeneID=OUR12_010994-T1|Product=ATP-binding cassette sub- D member 1|Dbxref=InterPro:IPR050835;InterPro:IPR027417;InterPro:IPR003439;I…
GO:0005337	PARKENT|GeneID=OUR12_000939-T1|Product=Epsin-1, required for endocytosis and actin patch assembly|Dbxref=InterPro:IPR002259;PFAM:PF01733,PARKENT|GeneID=OUR12_014372-T1|Product=hypothetical protein|Dbxref=InterPro:IPR036259;InterPro:IPR002259;PFAM:PF01733,PARKENT|GeneID=OUR12_015461-T1|Product=hypothetical protein|Dbxref=InterPro:IPR002259;PFAM:PF01733,PARKENT|GeneID=OUR12_015466-T1|Product=hypoth…
GO:0005338	PARKENT|GeneID=OUR12_008129-T1|Product=UDP-xylose transporter 1|Dbxref=InterPro:IPR004853;PFAM:PF03151;InterPro:IPR050186,PARKENT|GeneID=OUR12_008730-T1|Product=UDP-xylose transporter 3|Dbxref=InterPro:IPR004853;PFAM:PF03151;InterPro:IPR050186,PARKENT|GeneID=OUR12_011615-T1|Product=UDP-rhamnose/UDP-galactose transporter 6|Dbxref=InterPro:IPR004853;PFAM:PF03151;InterPro:IPR050186,PARKENT|GeneID=OU…
GO:0005344	PARKENT|GeneID=OUR12_004742-T1|Product=Two-on-two hemoglobin-3|Dbxref=InterPro:IPR001486;InterPro:IPR012292;InterPro:IPR044203;InterPro:IPR009050
GO:0005345	PARKENT|GeneID=OUR12_012335-T1|Product=Adenine/guanine permease azg1|Dbxref=InterPro:IPR006043;InterPro:IPR045018,PARKENT|GeneID=OUR12_019331-T1|Product=Adenine/guanine permease azg1|Dbxref=InterPro:IPR006043;InterPro:IPR045018,PARKENT|GeneID=OUR12_026372-T1|Product=Adenine/guanine permease azg2|Dbxref=InterPro:IPR006043;PFAM:PF00860;InterPro:IPR045018
GO:0005347	PARKENT|GeneID=OUR12_006575-T1|Product=NAD(+) salvage pathway protein|Dbxref=InterPro:IPR023395;PFAM:PF00153;InterPro:IPR018108;InterPro:IPR045900,PARKENT|GeneID=OUR12_012979-T1|Product=hypothetical protein|Dbxref=InterPro:IPR023395;PFAM:PF00153;InterPro:IPR002067;InterPro:IPR018108,PARKENT|GeneID=OUR12_021127-T1|Product=NAD(+) salvage pathway protein|Dbxref=InterPro:IPR002067;InterPro:IPR023395;…
GO:0005351	PARKENT|GeneID=OUR12_003603-T1|Product=Polyol transporter 5|Dbxref=InterPro:IPR003663;InterPro:IPR020846;InterPro:IPR036259;InterPro:IPR045262;InterPro:IPR005828;InterPro:IPR044776;PFAM:PF07690;InterPro:IPR005829;PFAM:PF00083,PARKENT|GeneID=OUR12_018143-T1|Product=Probable polyol transporter 4|Dbxref=InterPro:IPR003663;InterPro:IPR020846;InterPro:IPR036259;InterPro:IPR045262;InterPro:IPR005828;In…
GO:0005355	PARKENT|GeneID=OUR12_008434-T1|Product=hypothetical protein|Dbxref=InterPro:IPR003663;InterPro:IPR020846;InterPro:IPR036259;InterPro:IPR005828;PFAM:PF07690;InterPro:IPR005829;PFAM:PF00083;InterPro:IPR050820,PARKENT|GeneID=OUR12_024213-T1|Product=Vacuolar glucose transporter 1|Dbxref=InterPro:IPR003663;InterPro:IPR020846;InterPro:IPR036259;InterPro:IPR005828;PFAM:PF07690;InterPro:IPR005829;PFAM:PF…
GO:0005363	PARKENT|GeneID=OUR12_024096-T1|Product=hypothetical protein|Dbxref=InterPro:IPR034628
GO:0005366	PARKENT|GeneID=OUR12_015315-T1|Product=Sugar (and other) transporter|Dbxref=InterPro:IPR003663;InterPro:IPR020846;InterPro:IPR036259;InterPro:IPR005828;PFAM:PF07690;InterPro:IPR005829;PFAM:PF00083;InterPro:IPR050814,PARKENT|GeneID=OUR12_016023-T1|Product=Fibroblast growth factor 3|Dbxref=InterPro:IPR003663;InterPro:IPR020846;InterPro:IPR036259;InterPro:IPR005828;PFAM:PF07690;InterPro:IPR005829;PF…
GO:0005375	PARKENT|GeneID=OUR12_004106-T1|Product=hypothetical protein|Dbxref=InterPro:IPR007274,PARKENT|GeneID=OUR12_004107-T1|Product=hypothetical protein|Dbxref=InterPro:IPR007274,PARKENT|GeneID=OUR12_004108-T1|Product=hypothetical protein|Dbxref=InterPro:IPR007274,PARKENT|GeneID=OUR12_004522-T1|Product=hypothetical protein|Dbxref=PFAM:PF04145;InterPro:IPR007274,PARKENT|GeneID=OUR12_008483-T1|Product=hyp…
GO:0005381	PARKENT|GeneID=OUR12_000653-T1|Product=Vacuolar iron transporter 1|Dbxref=InterPro:IPR008217;PFAM:PF01988,PARKENT|GeneID=OUR12_000655-T1|Product=Vacuolar iron transporter 1|Dbxref=InterPro:IPR008217;PFAM:PF01988,PARKENT|GeneID=OUR12_006062-T1|Product=hypothetical protein|Dbxref=InterPro:IPR008217;PFAM:PF01988,PARKENT|GeneID=OUR12_010644-T1|Product=hypothetical protein|Dbxref=InterPro:IPR009716,PA…
GO:0005384	PARKENT|GeneID=OUR12_000337-T1|Product=hypothetical protein|Dbxref=InterPro:IPR001727;PFAM:PF01169,PARKENT|GeneID=OUR12_000653-T1|Product=Vacuolar iron transporter 1|Dbxref=InterPro:IPR008217;PFAM:PF01988,PARKENT|GeneID=OUR12_000655-T1|Product=Vacuolar iron transporter 1|Dbxref=InterPro:IPR008217;PFAM:PF01988,PARKENT|GeneID=OUR12_001894-T1|Product=hypothetical protein|Dbxref=InterPro:IPR001727;In…
GO:0005385	PARKENT|GeneID=OUR12_000142-T1|Product=hypothetical protein|Dbxref=InterPro:IPR004698;InterPro:IPR003689;PFAM:PF02535,PARKENT|GeneID=OUR12_000143-T1|Product=hypothetical protein|Dbxref=InterPro:IPR004698;InterPro:IPR003689;PFAM:PF02535,PARKENT|GeneID=OUR12_000691-T1|Product=IAA-alanine resistance protein 1|Dbxref=InterPro:IPR003689;PFAM:PF02535,PARKENT|GeneID=OUR12_002127-T1|Product=Metal toleran…
GO:0005388	PARKENT|GeneID=OUR12_006729-T1|Product=Putative calcium-transporting ATPase 13, plasma membrane-type|Dbxref=PFAM:PF00702;PFAM:PF00689;InterPro:IPR008250;InterPro:IPR004014;InterPro:IPR023214;PFAM:PF00690;InterPro:IPR001757;InterPro:IPR006068;InterPro:IPR036412;InterPro:IPR006408;PFAM:PF00122;PFAM:PF13246;InterPro:IPR018303;InterPro:IPR023298,PARKENT|GeneID=OUR12_006742-T1|Product=hypothetical pro…
GO:0005452	PARKENT|GeneID=OUR12_004831-T1|Product=Probable boron transporter 7|Dbxref=InterPro:IPR011531;InterPro:IPR003020,PARKENT|GeneID=OUR12_006300-T1|Product=Probable boron transporter 2|Dbxref=PFAM:PF00955;InterPro:IPR003020;InterPro:IPR011531,PARKENT|GeneID=OUR12_010005-T1|Product=Probable boron transporter 2|Dbxref=InterPro:IPR011531;InterPro:IPR003020,PARKENT|GeneID=OUR12_014284-T1|Product=Boron tr…
GO:0005457	PARKENT|GeneID=OUR12_006005-T1|Product=GDP-mannose transporter gonst1|Dbxref=InterPro:IPR004853;PFAM:PF03151;InterPro:IPR050186,PARKENT|GeneID=OUR12_008547-T1|Product=hypothetical protein|Dbxref=InterPro:IPR050186,PARKENT|GeneID=OUR12_016205-T1|Product=GDP-mannose transporter gonst3|Dbxref=InterPro:IPR004853;PFAM:PF03151;InterPro:IPR050186,PARKENT|GeneID=OUR12_016963-T1|Product=GDP-fucose transpo…
GO:0005459	PARKENT|GeneID=OUR12_001110-T1|Product=UDP-galactose/UDP-glucose transporter 3|Dbxref=PFAM:PF08449;InterPro:IPR013657,PARKENT|GeneID=OUR12_005103-T1|Product=UDP-galactose/UDP-glucose transporter 7|Dbxref=InterPro:IPR004853;PFAM:PF08449;PFAM:PF03151;InterPro:IPR050186,PARKENT|GeneID=OUR12_011615-T1|Product=UDP-rhamnose/UDP-galactose transporter 6|Dbxref=InterPro:IPR004853;PFAM:PF03151;InterPro:IPR…
GO:0005460	PARKENT|GeneID=OUR12_001110-T1|Product=UDP-galactose/UDP-glucose transporter 3|Dbxref=PFAM:PF08449;InterPro:IPR013657,PARKENT|GeneID=OUR12_005103-T1|Product=UDP-galactose/UDP-glucose transporter 7|Dbxref=InterPro:IPR004853;PFAM:PF08449;PFAM:PF03151;InterPro:IPR050186,PARKENT|GeneID=OUR12_026907-T1|Product=UDP-galactose transporter 1|Dbxref=PFAM:PF03151;InterPro:IPR050186;PFAM:PF08449;InterPro:IPR…
GO:0005464	PARKENT|GeneID=OUR12_008129-T1|Product=UDP-xylose transporter 1|Dbxref=InterPro:IPR004853;PFAM:PF03151;InterPro:IPR050186,PARKENT|GeneID=OUR12_008730-T1|Product=UDP-xylose transporter 3|Dbxref=InterPro:IPR004853;PFAM:PF03151;InterPro:IPR050186,PARKENT|GeneID=OUR12_019350-T1|Product=UDP-xylose transporter 3|Dbxref=InterPro:IPR004853;PFAM:PF03151;InterPro:IPR050186
GO:0005469	PARKENT|GeneID=OUR12_012208-T1|Product=Mitochondrial succinate-fumarate transporter|Dbxref=InterPro:IPR023395;PFAM:PF00153;InterPro:IPR018108;InterPro:IPR049563
GO:0005471	PARKENT|GeneID=OUR12_004411-T1|Product=hypothetical protein|Dbxref=InterPro:IPR002067;InterPro:IPR023395;InterPro:IPR018108;PFAM:PF00153;InterPro:IPR002113,PARKENT|GeneID=OUR12_014273-T1|Product=hypothetical protein|Dbxref=InterPro:IPR004667;PFAM:PF03219,PARKENT|GeneID=OUR12_018070-T1|Product=ADP/ATP carrier protein aac3|Dbxref=InterPro:IPR002067;InterPro:IPR023395;InterPro:IPR018108;PFAM:PF00153…
GO:0005483	PARKENT|GeneID=OUR12_012307-T1|Product=hypothetical protein|Dbxref=InterPro:IPR000744;InterPro:IPR011990,PARKENT|GeneID=OUR12_016194-T1|Product=hypothetical protein|Dbxref=InterPro:IPR000744;InterPro:IPR011990;PFAM:PF14938,PARKENT|GeneID=OUR12_019313-T1|Product=hypothetical protein|Dbxref=PFAM:PF14938;InterPro:IPR019734;PFAM:PF02071;PFAM:PF13181;InterPro:IPR011990;InterPro:IPR000744
GO:0005484	PARKENT|GeneID=OUR12_000075-T1|Product=SNAP25 ous protein|Dbxref=InterPro:IPR044766;InterPro:IPR000727,PARKENT|GeneID=OUR12_001213-T1|Product=Vesicle transport v-SNARE 12|Dbxref=PFAM:PF12352;InterPro:IPR038407;InterPro:IPR027027;InterPro:IPR007705;PFAM:PF03908;InterPro:IPR010989;PFAM:PF05008,PARKENT|GeneID=OUR12_002618-T1|Product=Novel plant SNARE 11|Dbxref=PFAM:PF03908;InterPro:IPR044766;InterPr…
GO:0005504	PARKENT|GeneID=OUR12_000723-T1|Product=hypothetical protein|Dbxref=PFAM:PF14368;InterPro:IPR039265;InterPro:IPR016140;PFAM:PF00234;InterPro:IPR036312,PARKENT|GeneID=OUR12_002507-T1|Product=acyl-coenzyme A oxidase|Dbxref=PFAM:PF14749;InterPro:IPR046373;InterPro:IPR006091;InterPro:IPR002655;InterPro:IPR012258;PFAM:PF01756;InterPro:IPR037069;PFAM:PF02770;InterPro:IPR055060;InterPro:IPR036250;InterPr…
GO:0005506	PARKENT|GeneID=OUR12_000025-T1|Product=hypothetical protein|Dbxref=InterPro:IPR017972;InterPro:IPR036396;InterPro:IPR001128;InterPro:IPR002401,PARKENT|GeneID=OUR12_000026-T1|Product=hypothetical protein|Dbxref=InterPro:IPR017972;PFAM:PF00067;InterPro:IPR0
GO:0005507	PARKENT|GeneID=OUR12_000152-T1|Product=serine/threonine protein kinase Ran1|Dbxref=PFAM:PF00702;InterPro:IPR008250;InterPro:IPR027256;InterPro:IPR023299;InterPro:IPR001757;InterPro:IPR023214;InterPro:IPR017969;InterPro:IPR036412;InterPro:IPR006121;PFAM:PF00122;InterPro:IPR036163;InterPro:IPR018303;PFAM:PF00403;InterPro:IPR023298;InterPro:IPR044492;InterPro:IPR006122,PARKENT|GeneID=OUR12_000821-T1…
GO:0005509	PARKENT|GeneID=OUR12_000118-T1|Product=Vacuolar-sorting receptor 6|Dbxref=PFAM:PF02225;InterPro:IPR001881;InterPro:IPR003137;InterPro:IPR026823;InterPro:IPR018097;InterPro:IPR046450;PFAM:PF25011;PFAM:PF12662,PARKENT|GeneID=OUR12_000268-T1|Product=hypothet
GO:0005515	PARKENT|GeneID=OUR12_000023-T1|Product=hypothetical protein|Dbxref=InterPro:IPR036322;InterPro:IPR015943;InterPro:IPR040092,PARKENT|GeneID=OUR12_000046-T1|Product=LRR receptor-like serine/threonine-protein kinase rpk2|Dbxref=InterPro:IPR000719;InterPro:IP
GO:0005516	PARKENT|GeneID=OUR12_001889-T1|Product=Mitogen-activated protein kinase cpk1|Dbxref=InterPro:IPR000719;PFAM:PF00036;InterPro:IPR018247;PFAM:PF13499;InterPro:IPR050205;InterPro:IPR011009;InterPro:IPR002048;PFAM:PF13833;InterPro:IPR008271;InterPro:IPR011992;PFAM:PF13405;InterPro:IPR017441;PFAM:PF07714;PFAM:PF00069;PFAM:PF13202,PARKENT|GeneID=OUR12_002294-T1|Product=hypothetical protein|Dbxref=Inter…
GO:0005524	PARKENT|GeneID=OUR12_000032-T1|Product=hypothetical protein|Dbxref=InterPro:IPR000719;InterPro:IPR024788;InterPro:IPR019794;InterPro:IPR008271;PFAM:PF12819;PFAM:PF11721;InterPro:IPR001245;InterPro:IPR045272;PFAM:PF00069;InterPro:IPR017441;PFAM:PF07714;Int
GO:0005525	PARKENT|GeneID=OUR12_000137-T1|Product=hypothetical protein|Dbxref=InterPro:IPR027417;InterPro:IPR006073;InterPro:IPR005662;InterPro:IPR005225;InterPro:IPR004044;PFAM:PF01926;InterPro:IPR030388;InterPro:IPR009019;PFAM:PF02421;InterPro:IPR015946;PFAM:PF076
GO:0005536	PARKENT|GeneID=OUR12_009098-T1|Product=hypothetical protein|Dbxref=InterPro:IPR022673;InterPro:IPR022672;InterPro:IPR043129;InterPro:IPR019807;InterPro:IPR001312,PARKENT|GeneID=OUR12_011225-T1|Product=hypothetical protein|Dbxref=InterPro:IPR022673;InterPro:IPR022672;InterPro:IPR043129;PFAM:PF00349;PFAM:PF03727;InterPro:IPR001312,PARKENT|GeneID=OUR12_014073-T1|Product=Hexokinase isoenzyme 2|Dbxref…
GO:0005542	PARKENT|GeneID=OUR12_018306-T1|Product=hypothetical protein|Dbxref=InterPro:IPR037070;InterPro:IPR051623;PFAM:PF07837;InterPro:IPR022384;InterPro:IPR037064;InterPro:IPR012886;InterPro:IPR013802
GO:0005543	PARKENT|GeneID=OUR12_000582-T1|Product=hypothetical protein|Dbxref=InterPro:IPR011417;InterPro:IPR014712;InterPro:IPR045192;PFAM:PF07651;InterPro:IPR048050;InterPro:IPR008942;InterPro:IPR013809,PARKENT|GeneID=OUR12_000663-T1|Product=hypothetical protein|Dbxref=InterPro:IPR011417;InterPro:IPR014712;InterPro:IPR045192;PFAM:PF07651;InterPro:IPR008942;InterPro:IPR013809,PARKENT|GeneID=OUR12_000694-T1…
GO:0005544	PARKENT|GeneID=OUR12_000687-T1|Product=hypothetical protein|Dbxref=InterPro:IPR037104;InterPro:IPR018252;InterPro:IPR001464;PFAM:PF00191;InterPro:IPR018502,PARKENT|GeneID=OUR12_009073-T1|Product=Annexin D8|Dbxref=InterPro:IPR037104;InterPro:IPR009118;InterPro:IPR018252;InterPro:IPR001464;PFAM:PF00191;InterPro:IPR018502,PARKENT|GeneID=OUR12_010967-T1|Product=hypothetical protein|Dbxref=InterPro:IP…
GO:0005545	PARKENT|GeneID=OUR12_000582-T1|Product=hypothetical protein|Dbxref=InterPro:IPR011417;InterPro:IPR014712;InterPro:IPR045192;PFAM:PF07651;InterPro:IPR048050;InterPro:IPR008942;InterPro:IPR013809,PARKENT|GeneID=OUR12_000663-T1|Product=hypothetical protein|Dbxref=InterPro:IPR011417;InterPro:IPR014712;InterPro:IPR045192;PFAM:PF07651;InterPro:IPR008942;InterPro:IPR013809,PARKENT|GeneID=OUR12_000694-T1…
GO:0005546	PARKENT|GeneID=OUR12_000582-T1|Product=hypothetical protein|Dbxref=InterPro:IPR011417;InterPro:IPR014712;InterPro:IPR045192;PFAM:PF07651;InterPro:IPR048050;InterPro:IPR008942;InterPro:IPR013809,PARKENT|GeneID=OUR12_000663-T1|Product=hypothetical protein|Dbxref=InterPro:IPR011417;InterPro:IPR014712;InterPro:IPR045192;PFAM:PF07651;InterPro:IPR008942;InterPro:IPR013809,PARKENT|GeneID=OUR12_000694-T1…
GO:0005548	PARKENT|GeneID=OUR12_007372-T1|Product=Protein TRIGALACTOSYLDIACYLGLYCEROL 1, chloroplastic|Dbxref=InterPro:IPR030802;InterPro:IPR003453;PFAM:PF02405,PARKENT|GeneID=OUR12_008218-T1|Product=hypothetical protein|Dbxref=PFAM:PF02121;InterPro:IPR001666;InterPro:IPR023393
GO:0005576	PARKENT|GeneID=OUR12_001163-T1|Product=hypothetical protein|Dbxref=InterPro:IPR001568;InterPro:IPR033697;InterPro:IPR036430;InterPro:IPR033130;InterPro:IPR018188;PFAM:PF00445,PARKENT|GeneID=OUR12_001174-T1|Product=Expansin-A10|Dbxref=InterPro:IPR036908;InterPro:IPR002963;InterPro:IPR007118;InterPro:IPR007112;InterPro:IPR036749;PFAM:PF03330;InterPro:IPR009009;PFAM:PF01357;PFAM:PF22514;InterPro:IPR…
GO:0005615	PARKENT|GeneID=OUR12_000495-T1|Product=Sulfhydryl oxidase 1|Dbxref=InterPro:IPR036774;InterPro:IPR013766;PFAM:PF04777;InterPro:IPR039798;InterPro:IPR017937;PFAM:PF00085;InterPro:IPR036249;InterPro:IPR017905,PARKENT|GeneID=OUR12_000762-T1|Product=hypothetical protein|Dbxref=InterPro:IPR000169;InterPro:IPR025660;InterPro:IPR039417;InterPro:IPR000668;PFAM:PF00112;PFAM:PF08246;InterPro:IPR038765;Inte…
GO:0005618	PARKENT|GeneID=OUR12_000682-T1|Product=Probable xyloglucan endotransglucosylase/hydrolase protein 27|Dbxref=InterPro:IPR000757;PFAM:PF06955;PFAM:PF00722;InterPro:IPR016455;InterPro:IPR010713;InterPro:IPR044791;InterPro:IPR013320,PARKENT|GeneID=OUR12_000944-T1|Product=hypothetical protein|Dbxref=InterPro:IPR000757;PFAM:PF06955;PFAM:PF00722;InterPro:IPR016455;InterPro:IPR010713;InterPro:IPR044791;I…
GO:0005622	PARKENT|GeneID=OUR12_000465-T1|Product=hypothetical protein|Dbxref=InterPro:IPR011545;PFAM:PF00270;InterPro:IPR027417;InterPro:IPR014001,PARKENT|GeneID=OUR12_000466-T1|Product=hypothetical protein|Dbxref=PFAM:PF21010;InterPro:IPR027417;InterPro:IPR001650;PFAM:PF04408;InterPro:IPR007502;InterPro:IPR048333;PFAM:PF00271,PARKENT|GeneID=OUR12_000467-T1|Product=hypothetical protein|Dbxref=InterPro:IPR0…
GO:0005634	PARKENT|GeneID=OUR12_000014-T1|Product=Agamous-like MADS-box protein ap1|Dbxref=PFAM:PF01486;InterPro:IPR050142;InterPro:IPR002487,PARKENT|GeneID=OUR12_000016-T1|Product=Agamous-like MADS-box protein mads2|Dbxref=PFAM:PF00319;PFAM:PF01486;InterPro:IPR0024
GO:0005635	PARKENT|GeneID=OUR12_000253-T1|Product=hypothetical protein|Dbxref=InterPro:IPR011989;InterPro:IPR016024;InterPro:IPR001494;PFAM:PF03810,PARKENT|GeneID=OUR12_000254-T1|Product=hypothetical protein|Dbxref=InterPro:IPR016024,PARKENT|GeneID=OUR12_004563-T1|Product=hypothetical protein|Dbxref=,PARKENT|GeneID=OUR12_004565-T1|Product=hypothetical protein|Dbxref=,PARKENT|GeneID=OUR12_005221-T1|Product=h…
GO:0005637	PARKENT|GeneID=OUR12_002666-T1|Product=hypothetical protein|Dbxref=InterPro:IPR044780;InterPro:IPR018996;InterPro:IPR041885;PFAM:PF09402
GO:0005643	PARKENT|GeneID=OUR12_000627-T1|Product=hypothetical protein|Dbxref=InterPro:IPR007187;InterPro:IPR014908;InterPro:IPR042538;InterPro:IPR004870;PFAM:PF03177;InterPro:IPR042533;PFAM:PF08801;InterPro:IPR042537,PARKENT|GeneID=OUR12_000774-T1|Product=hypothetical protein|Dbxref=PFAM:PF07817;InterPro:IPR012476;InterPro:IPR038506,PARKENT|GeneID=OUR12_001536-T1|Product=hypothetical protein|Dbxref=PFAM:PF…
GO:0005654	PARKENT|GeneID=OUR12_000362-T1|Product=Ubiquitin receptor RAD23c|Dbxref=InterPro:IPR009060;InterPro:IPR036353;PFAM:PF00240;PFAM:PF00627;InterPro:IPR029071;InterPro:IPR015940;InterPro:IPR000626;InterPro:IPR015360;PFAM:PF11976;InterPro:IPR006636;InterPro:IPR004806;PFAM:PF09280,PARKENT|GeneID=OUR12_000874-T1|Product=hypothetical protein|Dbxref=InterPro:IPR034264;InterPro:IPR035979;InterPro:IPR012677…
GO:0005655	PARKENT|GeneID=OUR12_008271-T1|Product=hypothetical protein|Dbxref=InterPro:IPR002738;PFAM:PF01876;InterPro:IPR016195,PARKENT|GeneID=OUR12_009660-T1|Product=Octanoyltransferase LIP2p2, chloroplastic|Dbxref=InterPro:IPR020605;InterPro:IPR045864;InterPro:IPR004143;PFAM:PF21948;InterPro:IPR000544,PARKENT|GeneID=OUR12_014565-T1|Product=hypothetical protein|Dbxref=InterPro:IPR039182;InterPro:IPR009723…
GO:0005656	PARKENT|GeneID=OUR12_001584-T1|Product=Origin recognition complex subunit 3|Dbxref=InterPro:IPR020795;InterPro:IPR045667,PARKENT|GeneID=OUR12_024131-T1|Product=Origin recognition complex subunit 3|Dbxref=InterPro:IPR020795;PFAM:PF18137;InterPro:IPR040855,PARKENT|GeneID=OUR12_024132-T1|Product=Origin recognition complex subunit 3|Dbxref=InterPro:IPR020795;InterPro:IPR045667,PARKENT|GeneID=OUR12_02…
GO:0005657	PARKENT|GeneID=OUR12_000132-T1|Product=hypothetical protein|Dbxref=InterPro:IPR043128;PFAM:PF00817;InterPro:IPR036775;InterPro:IPR017961;InterPro:IPR001126;InterPro:IPR043502;PFAM:PF11799;InterPro:IPR052230,PARKENT|GeneID=OUR12_008237-T1|Product=DNA repair protein RAD51|Dbxref=InterPro:IPR027417;InterPro:IPR030548;PFAM:PF26169;InterPro:IPR016467;InterPro:IPR020588;InterPro:IPR013632;InterPro:IPR0…
GO:0005658	PARKENT|GeneID=OUR12_001525-T1|Product=hypothetical protein|Dbxref=InterPro:IPR007185;PFAM:PF22062;PFAM:PF04042;InterPro:IPR016722;InterPro:IPR043034;InterPro:IPR054300;InterPro:IPR013627;PFAM:PF08418,PARKENT|GeneID=OUR12_001964-T1|Product=hypothetical protein|Dbxref=InterPro:IPR002755;InterPro:IPR014052;PFAM:PF01896,PARKENT|GeneID=OUR12_007141-T1|Product=hypothetical protein|Dbxref=InterPro:IPR0…
GO:0005662	PARKENT|GeneID=OUR12_003009-T1|Product=hypothetical protein|Dbxref=InterPro:IPR004365;InterPro:IPR012340;InterPro:IPR007199;PFAM:PF16900;InterPro:IPR047192;InterPro:IPR001878;PFAM:PF00098;PFAM:PF01336;InterPro:IPR004591;InterPro:IPR013955;InterPro:IPR036875;InterPro:IPR031657;PFAM:PF08646;PFAM:PF04057,PARKENT|GeneID=OUR12_004573-T1|Product=hypothetical protein|Dbxref=InterPro:IPR004365;InterPro:I…
GO:0005663	PARKENT|GeneID=OUR12_002255-T1|Product=Subunit of heteropentameric Replication factor C (RF-C)|Dbxref=PFAM:PF00004;InterPro:IPR027417;InterPro:IPR047854;PFAM:PF08542;PFAM:PF13177;InterPro:IPR013748;InterPro:IPR050238;InterPro:IPR003959;InterPro:IPR008921;PFAM:PF13173;InterPro:IPR003593,PARKENT|GeneID=OUR12_002751-T1|Product=hypothetical protein|Dbxref=InterPro:IPR008921;InterPro:IPR027417;InterPr…
GO:0005664	PARKENT|GeneID=OUR12_000472-T1|Product=origin recognition complex subunit 4|Dbxref=InterPro:IPR032705;PFAM:PF00004;PFAM:PF13401;InterPro:IPR027417;InterPro:IPR016527;InterPro:IPR003959;InterPro:IPR003593,PARKENT|GeneID=OUR12_001140-T1|Product=Origin of replication complex subunit 6|Dbxref=InterPro:IPR054113;PFAM:PF05460;InterPro:IPR008721;InterPro:IPR020529;PFAM:PF21913,PARKENT|GeneID=OUR12_00158…
GO:0005665	PARKENT|GeneID=OUR12_001585-T1|Product=hypothetical protein|Dbxref=InterPro:IPR045867,PARKENT|GeneID=OUR12_002296-T1|Product=hypothetical protein|Dbxref=InterPro:IPR007083;InterPro:IPR038120;InterPro:IPR000722;InterPro:IPR045867;InterPro:IPR040403;InterPro:IPR040402;PFAM:PF00623;InterPro:IPR007066;InterPro:IPR006592;PFAM:PF11523;InterPro:IPR042102;PFAM:PF04983,PARKENT|GeneID=OUR12_003785-T1|Produ…
GO:0005666	PARKENT|GeneID=OUR12_002493-T1|Product=hypothetical protein|Dbxref=InterPro:IPR016049;InterPro:IPR007832;InterPro:IPR036390;InterPro:IPR036388,PARKENT|GeneID=OUR12_005482-T1|Product=hypothetical protein|Dbxref=InterPro:IPR006886,PARKENT|GeneID=OUR12_006579-T1|Product=hypothetical protein|Dbxref=PFAM:PF08221;InterPro:IPR013197;InterPro:IPR039748;PFAM:PF05645;InterPro:IPR008806;InterPro:IPR036388,P…
GO:0005667	PARKENT|GeneID=OUR12_000330-T1|Product=hypothetical protein|Dbxref=InterPro:IPR021419,PARKENT|GeneID=OUR12_000332-T1|Product=Mediator of RNA polymerase II transcription subunit 25|Dbxref=PFAM:PF11265;InterPro:IPR021419,PARKENT|GeneID=OUR12_000606-T1|Product=Mediator of RNA polymerase II transcription subunit 23|Dbxref=InterPro:IPR021629,PARKENT|GeneID=OUR12_000607-T1|Product=Mediator of RNA polym…
GO:0005669	PARKENT|GeneID=OUR12_000179-T1|Product=hypothetical protein|Dbxref=InterPro:IPR009072;PFAM:PF07524;InterPro:IPR006565;InterPro:IPR037818,PARKENT|GeneID=OUR12_003863-T1|Product=hypothetical protein|Dbxref=InterPro:IPR045144;InterPro:IPR022003;InterPro:IPR007900;PFAM:PF12174;PFAM:PF05236,PARKENT|GeneID=OUR12_004920-T1|Product=hypothetical protein|Dbxref=PFAM:PF04494;InterPro:IPR007582;InterPro:IPR0…
GO:0005672	PARKENT|GeneID=OUR12_008436-T1|Product=hypothetical protein|Dbxref=InterPro:IPR009088;InterPro:IPR004855,PARKENT|GeneID=OUR12_027259-T1|Product=hypothetical protein|Dbxref=InterPro:IPR015872;InterPro:IPR003194;PFAM:PF02268;InterPro:IPR009088;InterPro:IPR009083;InterPro:IPR015871;PFAM:PF02751
GO:0005673	PARKENT|GeneID=OUR12_000001-T1|Product=hypothetical protein|Dbxref=InterPro:IPR039997;InterPro:IPR013083,PARKENT|GeneID=OUR12_002231-T1|Product=hypothetical protein|Dbxref=InterPro:IPR011008;PFAM:PF18121;InterPro:IPR003166;InterPro:IPR013097;InterPro:IPR016656;PFAM:PF07876;InterPro:IPR040501,PARKENT|GeneID=OUR12_005445-T1|Product=hypothetical protein|Dbxref=InterPro:IPR016656;InterPro:IPR003166,P…
GO:0005674	PARKENT|GeneID=OUR12_015177-T1|Product=Transcription initiation factor IIF subunit alpha|Dbxref=InterPro:IPR011039;InterPro:IPR008851;InterPro:IPR036390;PFAM:PF05793;InterPro:IPR036388,PARKENT|GeneID=OUR12_019761-T1|Product=hypothetical protein|Dbxref=InterPro:IPR003196;PFAM:PF17683;InterPro:IPR036390;InterPro:IPR040504;PFAM:PF02270;InterPro:IPR040450;InterPro:IPR011039;InterPro:IPR036388,PARKENT…
GO:0005675	PARKENT|GeneID=OUR12_001818-T1|Product=General transcription and DNA repair factor IIH helicase subunit xpb1|Dbxref=PFAM:PF13625;InterPro:IPR027417;InterPro:IPR014001;InterPro:IPR001650;PFAM:PF16203;InterPro:IPR032830;InterPro:IPR050615;InterPro:IPR001161;PFAM:PF04851;InterPro:IPR032438;PFAM:PF00271;InterPro:IPR006935,PARKENT|GeneID=OUR12_002369-T1|Product=TFIIH complex subunit tfb5|Dbxref=InterP…
GO:0005680	PARKENT|GeneID=OUR12_001190-T1|Product=anaphase-promoting complex subunit 2|Dbxref=InterPro:IPR014786;InterPro:IPR036317;InterPro:IPR016158;PFAM:PF08672;PFAM:PF26557;InterPro:IPR036390;PFAM:PF25773;InterPro:IPR044554;InterPro:IPR001373;InterPro:IPR036388,PARKENT|GeneID=OUR12_002316-T1|Product=B-type cell cycle switch protein ccs52A|Dbxref=InterPro:IPR036322;PFAM:PF24807;InterPro:IPR019775;PFAM:PF…
GO:0005681	PARKENT|GeneID=OUR12_001816-T1|Product=hypothetical protein|Dbxref=InterPro:IPR050441;InterPro:IPR035979;InterPro:IPR012677;InterPro:IPR000504;PFAM:PF00076,PARKENT|GeneID=OUR12_003431-T1|Product=Small nuclear ribonucleoprotein SmD3b|Dbxref=PFAM:PF01423;InterPro:IPR027141;InterPro:IPR034099;InterPro:IPR010920;InterPro:IPR001163;InterPro:IPR047575,PARKENT|GeneID=OUR12_005217-T1|Product=hypothetical…
GO:0005682	PARKENT|GeneID=OUR12_000657-T1|Product=mRNA splicing protein|Dbxref=PFAM:PF01423;InterPro:IPR027248;InterPro:IPR010920;InterPro:IPR001163;InterPro:IPR047575,PARKENT|GeneID=OUR12_003431-T1|Product=Small nuclear ribonucleoprotein SmD3b|Dbxref=PFAM:PF01423;InterPro:IPR027141;InterPro:IPR034099;InterPro:IPR010920;InterPro:IPR001163;InterPro:IPR047575,PARKENT|GeneID=OUR12_006730-T1|Product=Thioredoxin…
GO:0005684	PARKENT|GeneID=OUR12_000308-T1|Product=hypothetical protein|Dbxref=PFAM:PF04502;InterPro:IPR007590,PARKENT|GeneID=OUR12_002686-T1|Product=hypothetical protein|Dbxref=InterPro:IPR051112;InterPro:IPR018609;PFAM:PF09736,PARKENT|GeneID=OUR12_002687-T1|Product=hypothetical protein|Dbxref=InterPro:IPR051112,PARKENT|GeneID=OUR12_005734-T1|Product=hypothetical protein|Dbxref=InterPro:IPR051376;PFAM:PF125…
GO:0005685	PARKENT|GeneID=OUR12_000657-T1|Product=mRNA splicing protein|Dbxref=PFAM:PF01423;InterPro:IPR027248;InterPro:IPR010920;InterPro:IPR001163;InterPro:IPR047575,PARKENT|GeneID=OUR12_003431-T1|Product=Small nuclear ribonucleoprotein SmD3b|Dbxref=PFAM:PF01423;InterPro:IPR027141;InterPro:IPR034099;InterPro:IPR010920;InterPro:IPR001163;InterPro:IPR047575,PARKENT|GeneID=OUR12_005403-T1|Product=hypothetica…
GO:0005686	PARKENT|GeneID=OUR12_000212-T1|Product=hypothetical protein|Dbxref=PFAM:PF01805;PFAM:PF00240;InterPro:IPR035967;InterPro:IPR022030;InterPro:IPR029071;PFAM:PF12230;InterPro:IPR000626;InterPro:IPR035563;InterPro:IPR000061;InterPro:IPR045146,PARKENT|GeneID=OUR12_000657-T1|Product=mRNA splicing protein|Dbxref=PFAM:PF01423;InterPro:IPR027248;InterPro:IPR010920;InterPro:IPR001163;InterPro:IPR047575,PAR…
GO:0005687	PARKENT|GeneID=OUR12_000947-T1|Product=U4/U6-U5 snRNP complex subunit prp31|Dbxref=InterPro:IPR042239;InterPro:IPR036070;PFAM:PF01798;InterPro:IPR012976;InterPro:IPR002687;PFAM:PF09785;InterPro:IPR019175;InterPro:IPR027105,PARKENT|GeneID=OUR12_003431-T1|Product=Small nuclear ribonucleoprotein SmD3b|Dbxref=PFAM:PF01423;InterPro:IPR027141;InterPro:IPR034099;InterPro:IPR010920;InterPro:IPR001163;Int…
GO:0005688	PARKENT|GeneID=OUR12_009633-T1|Product=U6 snRNA-associated Sm-like protein LSm2|Dbxref=PFAM:PF01423;InterPro:IPR016654;InterPro:IPR010920;InterPro:IPR001163;InterPro:IPR047575,PARKENT|GeneID=OUR12_020671-T1|Product=Sm-like protein lsm7|Dbxref=PFAM:PF01423;InterPro:IPR017132;InterPro:IPR010920;InterPro:IPR044641;InterPro:IPR001163;InterPro:IPR047575,PARKENT|GeneID=OUR12_021058-T1|Product=hypotheti…
GO:0005689	PARKENT|GeneID=OUR12_003431-T1|Product=Small nuclear ribonucleoprotein SmD3b|Dbxref=PFAM:PF01423;InterPro:IPR027141;InterPro:IPR034099;InterPro:IPR010920;InterPro:IPR001163;InterPro:IPR047575,PARKENT|GeneID=OUR12_005485-T1|Product=Splicing factor 3B subunit 4|Dbxref=InterPro:IPR034158;InterPro:IPR034159;InterPro:IPR035979;InterPro:IPR052084;InterPro:IPR012677;InterPro:IPR000504;PFAM:PF00076,PARKE…
GO:0005694	PARKENT|GeneID=OUR12_001855-T1|Product=hypothetical protein|Dbxref=InterPro:IPR002815;InterPro:IPR034136;InterPro:IPR036078,PARKENT|GeneID=OUR12_005117-T1|Product=Structural maintenance of chromosomes protein 3|Dbxref=PFAM:PF02463;InterPro:IPR027417;InterPro:IPR010935;PFAM:PF06470;InterPro:IPR036277;InterPro:IPR003395;InterPro:IPR024704,PARKENT|GeneID=OUR12_010157-T1|Product=Structural maintenanc…
GO:0005697	PARKENT|GeneID=OUR12_009036-T1|Product=hypothetical protein|Dbxref=PFAM:PF10373;InterPro:IPR045153;InterPro:IPR019458;PFAM:PF10374;InterPro:IPR018834;InterPro:IPR011990,PARKENT|GeneID=OUR12_013326-T1|Product=hypothetical protein|Dbxref=PFAM:PF10373;InterPro:IPR045153;InterPro:IPR019458;PFAM:PF10374;InterPro:IPR018834;InterPro:IPR011990,PARKENT|GeneID=OUR12_015624-T1|Product=hypothetical protein|D…
GO:0005730	PARKENT|GeneID=OUR12_000008-T1|Product=hypothetical protein|Dbxref=InterPro:IPR007276;PFAM:PF04147,PARKENT|GeneID=OUR12_000009-T1|Product=hypothetical protein|Dbxref=InterPro:IPR007276,PARKENT|GeneID=OUR12_000186-T1|Product=hypothetical protein|Dbxref=InterPro:IPR053940;InterPro:IPR010678,PARKENT|GeneID=OUR12_000230-T1|Product=hypothetical protein|Dbxref=InterPro:IPR035979;InterPro:IPR012677;Inte…
GO:0005732	PARKENT|GeneID=OUR12_026222-T1|Product=hypothetical protein|Dbxref=InterPro:IPR012173
GO:0005736	PARKENT|GeneID=OUR12_007661-T1|Product=DNA-directed RNA polymerases II and V subunit 8A|Dbxref=InterPro:IPR012340;InterPro:IPR005570;PFAM:PF03870,PARKENT|GeneID=OUR12_007662-T1|Product=hypothetical protein|Dbxref=InterPro:IPR012340;InterPro:IPR005570;PFAM:PF03870,PARKENT|GeneID=OUR12_008494-T1|Product=hypothetical protein|Dbxref=InterPro:IPR009025;PFAM:PF01193;InterPro:IPR008193;InterPro:IPR02290…
GO:0005737	PARKENT|GeneID=OUR12_000069-T1|Product=Growth-regulating factor 12|Dbxref=InterPro:IPR000308;PFAM:PF00244;InterPro:IPR023410;InterPro:IPR023409;InterPro:IPR036815,PARKENT|GeneID=OUR12_000084-T1|Product=Transcription factor stp1|Dbxref=InterPro:IPR035090;I
GO:0005739	PARKENT|GeneID=OUR12_000085-T1|Product=hypothetical protein|Dbxref=InterPro:IPR050361;InterPro:IPR007863;InterPro:IPR011765;InterPro:IPR001431;PFAM:PF05193;InterPro:IPR011249;PFAM:PF00675,PARKENT|GeneID=OUR12_000128-T1|Product=hypothetical protein|Dbxref=
GO:0005740	PARKENT|GeneID=OUR12_004848-T1|Product=Cytochrome c oxidase subunit 5b-2, mitochondrial|Dbxref=InterPro:IPR002124,PARKENT|GeneID=OUR12_014299-T1|Product=hypothetical protein|Dbxref=InterPro:IPR036972;InterPro:IPR002124,PARKENT|GeneID=OUR12_014300-T1|Product=hypothetical protein|Dbxref=InterPro:IPR002124,PARKENT|GeneID=OUR12_029975-T1|Product=Cytochrome c oxidase subunit 5B|Dbxref=InterPro:IPR0056…
GO:0005741	PARKENT|GeneID=OUR12_000237-T1|Product=hypothetical protein|Dbxref=PFAM:PF00004;PFAM:PF17862;InterPro:IPR027417;InterPro:IPR003960;InterPro:IPR003959;InterPro:IPR051701;InterPro:IPR041569;PFAM:PF24933;InterPro:IPR003593,PARKENT|GeneID=OUR12_001085-T1|Product=hypothetical protein|Dbxref=InterPro:IPR001925;PFAM:PF01459;InterPro:IPR027246;InterPro:IPR023614,PARKENT|GeneID=OUR12_001886-T1|Product=hyp…
GO:0005742	PARKENT|GeneID=OUR12_003634-T1|Product=hypothetical protein|Dbxref=InterPro:IPR034554,PARKENT|GeneID=OUR12_004024-T1|Product=hypothetical protein|Dbxref=PFAM:PF01459;InterPro:IPR037930;InterPro:IPR027246;InterPro:IPR023614,PARKENT|GeneID=OUR12_022234-T1|Product=mitochondrial import receptor subunit tom20|Dbxref=InterPro:IPR010547;PFAM:PF06552;InterPro:IPR011990,PARKENT|GeneID=OUR12_025853-T1|Prod…
GO:0005743	PARKENT|GeneID=OUR12_000790-T1|Product=hypothetical protein|Dbxref=InterPro:IPR027540;InterPro:IPR007715;PFAM:PF05019,PARKENT|GeneID=OUR12_004403-T1|Product=Mitochondrial carrier protein CoAc1|Dbxref=InterPro:IPR023395;PFAM:PF00153;InterPro:IPR002067;InterPro:IPR018108,PARKENT|GeneID=OUR12_004411-T1|Product=hypothetical protein|Dbxref=InterPro:IPR002067;InterPro:IPR023395;InterPro:IPR018108;PFAM:…
GO:0005744	PARKENT|GeneID=OUR12_003023-T1|Product=mitochondrial import inner membrane translocase subunit tim21|Dbxref=PFAM:PF08294;InterPro:IPR013261;InterPro:IPR038552,PARKENT|GeneID=OUR12_005015-T1|Product=hypothetical protein|Dbxref=PFAM:PF02466;InterPro:IPR045238,PARKENT|GeneID=OUR12_005168-T1|Product=hypothetical protein|Dbxref=PFAM:PF02466;InterPro:IPR045238,PARKENT|GeneID=OUR12_007428-T1|Product=hyp…
GO:0005745	PARKENT|GeneID=OUR12_008415-T1|Product=ATP-dependent zinc metalloprotease FTSH 10, mitochondrial|Dbxref=PFAM:PF00004;PFAM:PF17862;InterPro:IPR027417;InterPro:IPR003960;PFAM:PF01434;InterPro:IPR037219;InterPro:IPR003959;InterPro:IPR050928;InterPro:IPR011546;InterPro:IPR041569;InterPro:IPR000642;PFAM:PF06480;InterPro:IPR003593;InterPro:IPR005936,PARKENT|GeneID=OUR12_012789-T1|Product=hypothetical p…
GO:0005746	PARKENT|GeneID=OUR12_006082-T1|Product=hypothetical protein|Dbxref=InterPro:IPR040153;PFAM:PF04588;InterPro:IPR007667,PARKENT|GeneID=OUR12_019322-T1|Product=hypothetical protein|Dbxref=InterPro:IPR040153;PFAM:PF04588;InterPro:IPR007667,PARKENT|GeneID=OUR12_021065-T1|Product=hypothetical protein|Dbxref=InterPro:IPR040153
GO:0005747	PARKENT|GeneID=OUR12_000733-T1|Product=hypothetical protein|Dbxref=InterPro:IPR008698;PFAM:PF05676,PARKENT|GeneID=OUR12_000764-T1|Product=hypothetical protein|Dbxref=,PARKENT|GeneID=OUR12_001625-T1|Product=hypothetical protein|Dbxref=PFAM:PF17250;PFAM:PF00504;InterPro:IPR035204;InterPro:IPR022796,PARKENT|GeneID=OUR12_001803-T1|Product=hypothetical protein|Dbxref=InterPro:IPR036249;InterPro:IPR016…
GO:0005749	PARKENT|GeneID=OUR12_005504-T1|Product=Succinate dehydrogenase [ubiquinone] flavoprotein subunit 1, mitochondrial|Dbxref=InterPro:IPR011281;InterPro:IPR003953;InterPro:IPR014006;InterPro:IPR015939;InterPro:IPR030664;InterPro:IPR003952;InterPro:IPR037099;InterPro:IPR027477;InterPro:IPR036188;PFAM:PF02910;PFAM:PF00890,PARKENT|GeneID=OUR12_010297-T1|Product=succinate dehydrogenase|Dbxref=InterPro:IP…
GO:0005750	PARKENT|GeneID=OUR12_001764-T1|Product=hypothetical protein|Dbxref=InterPro:IPR036922;InterPro:IPR005805;PFAM:PF02921;InterPro:IPR014349;InterPro:IPR006317;PFAM:PF00355;InterPro:IPR004192;InterPro:IPR017941,PARKENT|GeneID=OUR12_004833-T1|Product=hypothetical protein|Dbxref=PFAM:PF02271;InterPro:IPR003197;InterPro:IPR036544,PARKENT|GeneID=OUR12_013104-T1|Product=hypothetical protein|Dbxref=InterPr…
GO:0005753	PARKENT|GeneID=OUR12_000483-T1|Product=hypothetical protein|Dbxref=InterPro:IPR004100;InterPro:IPR027417;InterPro:IPR024034;InterPro:IPR005722;InterPro:IPR050053;InterPro:IPR000194;InterPro:IPR020003;InterPro:IPR036121;InterPro:IPR020971;InterPro:IPR042079;PFAM:PF02874;PFAM:PF22919;InterPro:IPR003593;PFAM:PF00006;PFAM:PF11421,PARKENT|GeneID=OUR12_025565-T1|Product=hypothetical protein|Dbxref=Inte…
GO:0005758	PARKENT|GeneID=OUR12_004446-T1|Product=hypothetical protein|Dbxref=InterPro:IPR007918;InterPro:IPR036811;PFAM:PF05254,PARKENT|GeneID=OUR12_008021-T1|Product=hypothetical protein|Dbxref=InterPro:IPR037365;InterPro:IPR006797;PFAM:PF04707,PARKENT|GeneID=OUR12_016454-T1|Product=Oxidoreductase|Dbxref=InterPro:IPR039289;PFAM:PF06747;InterPro:IPR010625,PARKENT|GeneID=OUR12_019054-T1|Product=hypothetical…
GO:0005759	PARKENT|GeneID=OUR12_000554-T1|Product=10 kDa chaperonin|Dbxref=InterPro:IPR037124;InterPro:IPR011032;InterPro:IPR020818;PFAM:PF00166,PARKENT|GeneID=OUR12_000881-T1|Product=iron-binding protein|Dbxref=PFAM:PF01592;InterPro:IPR002871;InterPro:IPR011339,PARKENT|GeneID=OUR12_002381-T1|Product=hypothetical protein|Dbxref=PFAM:PF25455;InterPro:IPR027266;InterPro:IPR045179;InterPro:IPR017703,PARKENT|Ge…
GO:0005761	PARKENT|GeneID=OUR12_004240-T1|Product=hypothetical protein|Dbxref=InterPro:IPR035566;InterPro:IPR005813;PFAM:PF00453,PARKENT|GeneID=OUR12_023868-T1|Product=hypothetical protein|Dbxref=InterPro:IPR039145,PARKENT|GeneID=OUR12_026143-T1|Product=hypothetical protein|Dbxref=InterPro:IPR001854;InterPro:IPR010729;PFAM:PF06984;PFAM:PF00831;InterPro:IPR036049;InterPro:IPR038340
GO:0005762	PARKENT|GeneID=OUR12_000385-T1|Product=60S ribosomal protein L15|Dbxref=InterPro:IPR036227;PFAM:PF00828;InterPro:IPR030878;InterPro:IPR021131;InterPro:IPR005749;InterPro:IPR001196,PARKENT|GeneID=OUR12_002126-T1|Product=60S ribosomal protein L11|Dbxref=InterPro:IPR036796;InterPro:IPR036769;InterPro:IPR020784;InterPro:IPR000911;InterPro:IPR020783;PFAM:PF03946;InterPro:IPR006519;PFAM:PF00298;InterPr…
GO:0005763	PARKENT|GeneID=OUR12_008585-T1|Product=hypothetical protein|Dbxref=PFAM:PF01084;InterPro:IPR036870;InterPro:IPR001648,PARKENT|GeneID=OUR12_008693-T1|Product=hypothetical protein|Dbxref=PFAM:PF10236;InterPro:IPR019368,PARKENT|GeneID=OUR12_009345-T1|Product=Small ribosomal subunit protein uS9m|Dbxref=InterPro:IPR014721;InterPro:IPR000754;InterPro:IPR020568;InterPro:IPR023035;InterPro:IPR020574;PFAM…
GO:0005764	PARKENT|GeneID=OUR12_000762-T1|Product=hypothetical protein|Dbxref=InterPro:IPR000169;InterPro:IPR025660;InterPro:IPR039417;InterPro:IPR000668;PFAM:PF00112;PFAM:PF08246;InterPro:IPR038765;InterPro:IPR025661;InterPro:IPR013128;InterPro:IPR013201,PARKENT|GeneID=OUR12_003144-T1|Product=Cysteine protease rd19a|Dbxref=InterPro:IPR000169;InterPro:IPR025660;InterPro:IPR039417;InterPro:IPR000668;PFAM:PF0…
GO:0005765	PARKENT|GeneID=OUR12_002171-T1|Product=Signal peptide peptidase-like 2|Dbxref=PFAM:PF02225;InterPro:IPR003137;PFAM:PF04258;InterPro:IPR006639;InterPro:IPR046450;InterPro:IPR007369,PARKENT|GeneID=OUR12_002863-T1|Product=signal peptide peptidase-like|Dbxref=InterPro:IPR007369;InterPro:IPR035513;InterPro:IPR043129;InterPro:IPR004000,PARKENT|GeneID=OUR12_007400-T1|Product=Signal peptide peptidase-lik…
GO:0005768	PARKENT|GeneID=OUR12_000487-T1|Product=bck1-like resistance to osmotic shock|Dbxref=InterPro:IPR045251;InterPro:IPR038499;PFAM:PF03097;PFAM:PF13949;InterPro:IPR025304;InterPro:IPR004328,PARKENT|GeneID=OUR12_000903-T1|Product=hypothetical protein|Dbxref=,PARKENT|GeneID=OUR12_001107-T1|Product=Vacuolar protein sorting-associated protein 29|Dbxref=InterPro:IPR024654;InterPro:IPR028661;InterPro:IPR02…
GO:0005769	PARKENT|GeneID=OUR12_017832-T1|Product=hypothetical protein|Dbxref=InterPro:IPR001849;PFAM:PF00169;InterPro:IPR011993;InterPro:IPR045188,PARKENT|GeneID=OUR12_020335-T1|Product=hypothetical protein|Dbxref=InterPro:IPR036770;InterPro:IPR040847;PFAM:PF13639;PFAM:PF13606;PFAM:PF00069;InterPro:IPR013083;InterPro:IPR044584;InterPro:IPR000719;PFAM:PF13637;InterPro:IPR001841;PFAM:PF13445;PFAM:PF18346;PFA…
GO:0005770	PARKENT|GeneID=OUR12_005754-T1|Product=Vacuolar protein sorting-associated protein 35B|Dbxref=PFAM:PF03635;InterPro:IPR016024;InterPro:IPR042491;InterPro:IPR005378,PARKENT|GeneID=OUR12_006517-T1|Product=AP-5 complex subunit mu|Dbxref=PFAM:PF00928;InterPro:IPR039591;InterPro:IPR036168;InterPro:IPR028565,PARKENT|GeneID=OUR12_009197-T1|Product=Vacuolar protein sorting-associated protein 41|Dbxref=In…
GO:0005771	PARKENT|GeneID=OUR12_004355-T1|Product=hypothetical protein|Dbxref=InterPro:IPR005024;PFAM:PF03357,PARKENT|GeneID=OUR12_009152-T1|Product=hypothetical protein|Dbxref=InterPro:IPR005024;PFAM:PF03357,PARKENT|GeneID=OUR12_010057-T1|Product=hypothetical protein|Dbxref=PFAM:PF25880;InterPro:IPR005024;PFAM:PF03357,PARKENT|GeneID=OUR12_010180-T1|Product=hypothetical protein|Dbxref=InterPro:IPR005024;PFA…
GO:0005773	PARKENT|GeneID=OUR12_000211-T1|Product=Serine carboxypeptidase-like 35|Dbxref=InterPro:IPR018202;InterPro:IPR001563;PFAM:PF00450;InterPro:IPR029058;InterPro:IPR033124,PARKENT|GeneID=OUR12_001739-T1|Product=Serine carboxypeptidase-like 45|Dbxref=InterPro:IPR018202;InterPro:IPR001563;InterPro:IPR029058;InterPro:IPR033124,PARKENT|GeneID=OUR12_002127-T1|Product=Metal tolerance protein 1|Dbxref=InterP…
GO:0005774	PARKENT|GeneID=OUR12_000653-T1|Product=Vacuolar iron transporter 1|Dbxref=InterPro:IPR008217;PFAM:PF01988,PARKENT|GeneID=OUR12_000655-T1|Product=Vacuolar iron transporter 1|Dbxref=InterPro:IPR008217;PFAM:PF01988,PARKENT|GeneID=OUR12_000816-T1|Product=Protein DETOXIFICATION 29|Dbxref=InterPro:IPR045069;PFAM:PF01554;InterPro:IPR002528,PARKENT|GeneID=OUR12_000818-T1|Product=Protein DETOXIFICATION 31…
GO:0005776	PARKENT|GeneID=OUR12_005934-T1|Product=hypothetical protein|Dbxref=InterPro:IPR011009;InterPro:IPR000719;PFAM:PF07714;InterPro:IPR045269,PARKENT|GeneID=OUR12_008757-T1|Product=hypothetical protein|Dbxref=InterPro:IPR000811;InterPro:IPR007241,PARKENT|GeneID=OUR12_010124-T1|Product=autophagy protein atg9|Dbxref=InterPro:IPR007241,PARKENT|GeneID=OUR12_012846-T1|Product=hypothetical protein|Dbxref=PF…
GO:0005777	PARKENT|GeneID=OUR12_000164-T1|Product=hypothetical protein|Dbxref=PFAM:PF13561;InterPro:IPR045017;PFAM:PF23441;PFAM:PF08659;InterPro:IPR036291;InterPro:IPR002347;PFAM:PF00106,PARKENT|GeneID=OUR12_001700-T1|Product=delta(3,5)-delta(2,4)-dienoyl-CoA isomerase|Dbxref=InterPro:IPR014748;InterPro:IPR045002;PFAM:PF16113;InterPro:IPR029045;PFAM:PF00378;InterPro:IPR018376;InterPro:IPR001753,PARKENT|Gene…
GO:0005778	PARKENT|GeneID=OUR12_002469-T1|Product=hypothetical protein|Dbxref=InterPro:IPR038322;InterPro:IPR006708;PFAM:PF04614,PARKENT|GeneID=OUR12_003482-T1|Product=3-hydroxy-3-methylglutaryl-coenzyme A (HMG-CoA) reductase isozyme|Dbxref=InterPro:IPR023282;InterPro:IPR023076;InterPro:IPR002202;InterPro:IPR023074;PFAM:PF00368;InterPro:IPR004554;InterPro:IPR009023;InterPro:IPR009029,PARKENT|GeneID=OUR12_00…
GO:0005779	PARKENT|GeneID=OUR12_006575-T1|Product=NAD(+) salvage pathway protein|Dbxref=InterPro:IPR023395;PFAM:PF00153;InterPro:IPR018108;InterPro:IPR045900,PARKENT|GeneID=OUR12_013351-T1|Product=Mitochondrial fission 1 protein A|Dbxref=InterPro:IPR033745;InterPro:IPR028061;PFAM:PF14852;PFAM:PF14853;InterPro:IPR028058;InterPro:IPR011990;InterPro:IPR016543,PARKENT|GeneID=OUR12_021127-T1|Product=NAD(+) salva…
GO:0005782	PARKENT|GeneID=OUR12_015025-T1|Product=hypothetical protein|Dbxref=PFAM:PF17408;InterPro:IPR038351;InterPro:IPR035372;InterPro:IPR038917;InterPro:IPR042303;InterPro:IPR007956,PARKENT|GeneID=OUR12_015767-T1|Product=hypothetical protein|Dbxref=InterPro:IPR036322;InterPro:IPR044536;InterPro:IPR020472;InterPro:IPR019775;PFAM:PF00400;InterPro:IPR001680;InterPro:IPR015943
GO:0005783	PARKENT|GeneID=OUR12_000062-T1|Product=hypothetical protein|Dbxref=InterPro:IPR033294;InterPro:IPR036013;PFAM:PF01145;InterPro:IPR001107,PARKENT|GeneID=OUR12_000528-T1|Product=hypothetical protein|Dbxref=InterPro:IPR053224;InterPro:IPR011042,PARKENT|GeneID=OUR12_000578-T1|Product=hypothetical protein|Dbxref=InterPro:IPR019308,PARKENT|GeneID=OUR12_000579-T1|Product=hypothetical protein|Dbxref=Inte…
GO:0005784	PARKENT|GeneID=OUR12_002494-T1|Product=Protein transport protein Sec61 subunit alpha|Dbxref=PFAM:PF10559;InterPro:IPR023201;InterPro:IPR002208;InterPro:IPR019561;InterPro:IPR030659;PFAM:PF00344,PARKENT|GeneID=OUR12_008179-T1|Product=hypothetical protein|Dbxref=InterPro:IPR030671;PFAM:PF03911;InterPro:IPR016482,PARKENT|GeneID=OUR12_019773-T1|Product=hypothetical protein|Dbxref=InterPro:IPR030671;P…
GO:0005785	PARKENT|GeneID=OUR12_000869-T1|Product=hypothetical protein|Dbxref=PFAM:PF00009;InterPro:IPR019009;InterPro:IPR027417;PFAM:PF09439;PFAM:PF04670;PFAM:PF01926;PFAM:PF00025,PARKENT|GeneID=OUR12_017258-T1|Product=hypothetical protein|Dbxref=PFAM:PF13401;PFAM:PF00448;InterPro:IPR027417;InterPro:IPR000897;InterPro:IPR042101;InterPro:IPR036225;InterPro:IPR011012;PFAM:PF02881;InterPro:IPR013822;PFAM:PF04…
GO:0005786	PARKENT|GeneID=OUR12_001496-T1|Product=hypothetical protein|Dbxref=PFAM:PF17004;PFAM:PF08492;InterPro:IPR013699;InterPro:IPR011990;InterPro:IPR031545;InterPro:IPR026270,PARKENT|GeneID=OUR12_007683-T1|Product=RNA-binding signal recognition particle subunit srp14|Dbxref=InterPro:IPR009018;PFAM:PF02290;InterPro:IPR003210,PARKENT|GeneID=OUR12_009444-T1|Product=Signal recognition particle protein|Dbxr…
GO:0005787	PARKENT|GeneID=OUR12_001599-T1|Product=hypothetical protein|Dbxref=PFAM:PF06645;InterPro:IPR009542,PARKENT|GeneID=OUR12_006558-T1|Product=hypothetical protein|Dbxref=InterPro:IPR007653;PFAM:PF04573,PARKENT|GeneID=OUR12_014346-T1|Product=hypothetical protein|Dbxref=InterPro:IPR036286;InterPro:IPR019533;PFAM:PF00717;InterPro:IPR001733;InterPro:IPR015927,PARKENT|GeneID=OUR12_019697-T1|Product=hypoth…
GO:0005788	PARKENT|GeneID=OUR12_007695-T1|Product=hypothetical protein|Dbxref=PFAM:PF08806;InterPro:IPR014912;InterPro:IPR036249;InterPro:IPR039992;InterPro:IPR038219,PARKENT|GeneID=OUR12_012589-T1|Product=DnaJ sub C member 3|Dbxref=PFAM:PF07719;InterPro:IPR044620;InterPro:IPR019734;InterPro:IPR013105;InterPro:IPR001623;PFAM:PF13174;InterPro:IPR011990;PFAM:PF13181;PFAM:PF13432;InterPro:IPR018253;InterPro:IP…
GO:0005789	PARKENT|GeneID=OUR12_000062-T1|Product=hypothetical protein|Dbxref=InterPro:IPR033294;InterPro:IPR036013;PFAM:PF01145;InterPro:IPR001107,PARKENT|GeneID=OUR12_000613-T1|Product=hypothetical protein|Dbxref=InterPro:IPR008417,PARKENT|GeneID=OUR12_001141-T1|Product=Arf guanine nucleotide exchange factor sbh1|Dbxref=PFAM:PF04116;InterPro:IPR006694;InterPro:IPR050307,PARKENT|GeneID=OUR12_001213-T1|Prod…
GO:0005793	PARKENT|GeneID=OUR12_001209-T1|Product=hypothetical protein|Dbxref=InterPro:IPR009038;InterPro:IPR015720;PFAM:PF01105,PARKENT|GeneID=OUR12_003579-T1|Product=hypothetical protein|Dbxref=PFAM:PF08752;InterPro:IPR013041;InterPro:IPR032154;PFAM:PF01602;InterPro:IPR009028;InterPro:IPR012295;InterPro:IPR037067;InterPro:IPR011989;InterPro:IPR017106;InterPro:IPR002553;PFAM:PF16381;InterPro:IPR013040;Inte…
GO:0005794	PARKENT|GeneID=OUR12_000024-T1|Product=Probable UDP-arabinopyranose mutase 2|Dbxref=InterPro:IPR037595;PFAM:PF03214;InterPro:IPR029044;InterPro:IPR004901,PARKENT|GeneID=OUR12_000066-T1|Product=hypothetical protein|Dbxref=PFAM:PF03151;InterPro:IPR050186;InterPro:IPR004696;InterPro:IPR004853;PFAM:PF00892,PARKENT|GeneID=OUR12_000067-T1|Product=hypothetical protein|Dbxref=PFAM:PF03151;InterPro:IPR050…
GO:0005795	PARKENT|GeneID=OUR12_018513-T1|Product=Alpha-1,6-mannosyl-glycoprotein 2-beta-N-acetylglucosaminyltransferase|Dbxref=InterPro:IPR029044;PFAM:PF05060;InterPro:IPR007754,PARKENT|GeneID=OUR12_020418-T1|Product=Golgin candidate 6|Dbxref=InterPro:IPR006953;InterPro:IPR011989;InterPro:IPR016024;PFAM:PF04869;PFAM:PF04871;InterPro:IPR006955,PARKENT|GeneID=OUR12_029267-T1|Product=hypothetical protein|Dbxr…
GO:0005797	PARKENT|GeneID=OUR12_004937-T1|Product=Golgi SNAP receptor complex member 1-1|Dbxref=PFAM:PF12352;InterPro:IPR023601,PARKENT|GeneID=OUR12_023509-T1|Product=Golgi SNAP receptor complex member 1-2|Dbxref=PFAM:PF12352;InterPro:IPR023601
GO:0005801	PARKENT|GeneID=OUR12_003245-T1|Product=hypothetical protein|Dbxref=PFAM:PF00810;InterPro:IPR000133,PARKENT|GeneID=OUR12_004937-T1|Product=Golgi SNAP receptor complex member 1-1|Dbxref=PFAM:PF12352;InterPro:IPR023601,PARKENT|GeneID=OUR12_007193-T1|Product=endoplasmic reticulum retention protein|Dbxref=PFAM:PF00810;InterPro:IPR000133,PARKENT|GeneID=OUR12_007236-T1|Product=hypothetical protein|Dbxre…
GO:0005802	PARKENT|GeneID=OUR12_001144-T1|Product=hypothetical protein|Dbxref=InterPro:IPR029063;PFAM:PF08241;InterPro:IPR004159;PFAM:PF03141,PARKENT|GeneID=OUR12_001201-T1|Product=hypothetical protein|Dbxref=InterPro:IPR004331;InterPro:IPR034092;PFAM:PF03105;InterPro:IPR004342,PARKENT|GeneID=OUR12_001202-T1|Product=Phosphate transporter PHO1 3|Dbxref=InterPro:IPR004331;InterPro:IPR034092;PFAM:PF03105;Inter…
GO:0005811	PARKENT|GeneID=OUR12_004623-T1|Product=Beta-amyrin synthase 1|Dbxref=InterPro:IPR018333;InterPro:IPR008930;InterPro:IPR002365;InterPro:IPR032696,PARKENT|GeneID=OUR12_004624-T1|Product=hypothetical protein|Dbxref=InterPro:IPR032697;InterPro:IPR018333;InterPro:IPR008930,PARKENT|GeneID=OUR12_014931-T1|Product=Cycloartenol synthase|Dbxref=InterPro:IPR018333;InterPro:IPR008930,PARKENT|GeneID=OUR12_014…
GO:0005813	PARKENT|GeneID=OUR12_001325-T1|Product=hypothetical protein|Dbxref=InterPro:IPR005314;InterPro:IPR030397,PARKENT|GeneID=OUR12_003871-T1|Product=hypothetical protein|Dbxref=PFAM:PF04484;InterPro:IPR007573,PARKENT|GeneID=OUR12_006441-T1|Product=Probable serine/threonine-protein phosphatase 2A regulatory subunit B'' subunit ton2|Dbxref=InterPro:IPR018247;InterPro:IPR002048;InterPro:IPR011992;InterPr…
GO:0005814	PARKENT|GeneID=OUR12_007759-T1|Product=Probable calcium-binding protein cml13|Dbxref=PFAM:PF00036;InterPro:IPR018247;PFAM:PF13499;InterPro:IPR002048;PFAM:PF13833;PFAM:PF00404;InterPro:IPR011992;PFAM:PF13405;InterPro:IPR050145;PFAM:PF13202,PARKENT|GeneID=OUR12_011480-T1|Product=hypothetical protein|Dbxref=PFAM:PF00036;InterPro:IPR018247;PFAM:PF13499;InterPro:IPR002048;PFAM:PF13833;InterPro:IPR0119…
GO:0005815	PARKENT|GeneID=OUR12_001125-T1|Product=Microtubule-associated protein RP/EB member 1B|Dbxref=PFAM:PF03271;InterPro:IPR004953;InterPro:IPR001715;InterPro:IPR027328;InterPro:IPR036133;InterPro:IPR036872,PARKENT|GeneID=OUR12_009830-T1|Product=Gamma-tubulin complex component 4|Dbxref=InterPro:IPR042241;InterPro:IPR007259;PFAM:PF04130;PFAM:PF17681;InterPro:IPR040457;InterPro:IPR041470,PARKENT|GeneID=O…
GO:0005819	PARKENT|GeneID=OUR12_000690-T1|Product=hypothetical protein|Dbxref=InterPro:IPR007145;PFAM:PF03999,PARKENT|GeneID=OUR12_001619-T1|Product=hypothetical protein|Dbxref=InterPro:IPR007145;PFAM:PF03999,PARKENT|GeneID=OUR12_002348-T1|Product=hypothetical protein|Dbxref=InterPro:IPR009675;InterPro:IPR027330;PFAM:PF12214,PARKENT|GeneID=OUR12_005242-T1|Product=hypothetical protein|Dbxref=InterPro:IPR0096…
GO:0005828	PARKENT|GeneID=OUR12_019625-T1|Product=Protein nedd1|Dbxref=InterPro:IPR036322;InterPro:IPR044621;PFAM:PF00400;InterPro:IPR001680;InterPro:IPR015943,PARKENT|GeneID=OUR12_026899-T1|Product=hypothetical protein|Dbxref=InterPro:IPR036322;InterPro:IPR044621;PFAM:PF00400;InterPro:IPR001680;InterPro:IPR015943
GO:0005829	PARKENT|GeneID=OUR12_000024-T1|Product=Probable UDP-arabinopyranose mutase 2|Dbxref=InterPro:IPR037595;PFAM:PF03214;InterPro:IPR029044;InterPro:IPR004901,PARKENT|GeneID=OUR12_000042-T1|Product=hypothetical protein|Dbxref=InterPro:IPR035979;InterPro:IPR002
GO:0005832	PARKENT|GeneID=OUR12_005448-T1|Product=T-complex protein 1 subunit delta|Dbxref=InterPro:IPR002423;InterPro:IPR027409;InterPro:IPR017998,PARKENT|GeneID=OUR12_011302-T1|Product=T-complex protein 1 subunit eta|Dbxref=InterPro:IPR027413;InterPro:IPR002423;InterPro:IPR027410;InterPro:IPR027409;InterPro:IPR017998;InterPro:IPR012720;InterPro:IPR002194,PARKENT|GeneID=OUR12_011826-T1|Product=T-complex pr…
GO:0005834	PARKENT|GeneID=OUR12_003576-T1|Product=hypothetical protein|Dbxref=InterPro:IPR036322;InterPro:IPR001632;InterPro:IPR016346;InterPro:IPR019775;PFAM:PF00400;InterPro:IPR001680;InterPro:IPR015943,PARKENT|GeneID=OUR12_003577-T1|Product=hypothetical protein|Dbxref=InterPro:IPR036322;InterPro:IPR016346;InterPro:IPR020472;InterPro:IPR001680;InterPro:IPR015943,PARKENT|GeneID=OUR12_004517-T1|Product=guan…
GO:0005838	PARKENT|GeneID=OUR12_001983-T1|Product=26S proteasome non-ATPase regulatory subunit 7 A|Dbxref=InterPro:IPR024969;InterPro:IPR037518;InterPro:IPR033858;PFAM:PF13012;InterPro:IPR000555;PFAM:PF01398,PARKENT|GeneID=OUR12_002023-T1|Product=26S proteasome non-ATPase regulatory subunit 8 A|Dbxref=InterPro:IPR006746,PARKENT|GeneID=OUR12_012942-T1|Product=26S proteasome non-ATPase regulatory subunit 7 A|…
GO:0005839	PARKENT|GeneID=OUR12_000772-T1|Product=Bifunctional protein GlmU|Dbxref=InterPro:IPR000243;InterPro:IPR016050;InterPro:IPR029055;InterPro:IPR001353;InterPro:IPR023333;PFAM:PF00227,PARKENT|GeneID=OUR12_001551-T1|Product=hypothetical protein|Dbxref=InterPro:IPR000243;InterPro:IPR016050;InterPro:IPR029055;InterPro:IPR001353;InterPro:IPR023333;PFAM:PF00227,PARKENT|GeneID=OUR12_001704-T1|Product=Prote…
GO:0005840	PARKENT|GeneID=OUR12_000077-T1|Product=Protein component of the small (40S) ribosomal subunit|Dbxref=InterPro:IPR001266;InterPro:IPR036390;InterPro:IPR018277;PFAM:PF01090;InterPro:IPR036388,PARKENT|GeneID=OUR12_000157-T1|Product=hypothetical protein|Dbxre
GO:0005844	PARKENT|GeneID=OUR12_006233-T1|Product=hypothetical protein|Dbxref=InterPro:IPR016655;InterPro:IPR044549;PFAM:PF02996;InterPro:IPR009053;InterPro:IPR004127,PARKENT|GeneID=OUR12_013994-T1|Product=hypothetical protein|Dbxref=InterPro:IPR040213;InterPro:IPR006575;InterPro:IPR016135,PARKENT|GeneID=OUR12_015964-T1|Product=hypothetical protein|Dbxref=InterPro:IPR036388;InterPro:IPR034878;InterPro:IPR03…
GO:0005845	PARKENT|GeneID=OUR12_009095-T1|Product=Nucleic acid dioxygenase ALKBH1|Dbxref=PFAM:PF02854;InterPro:IPR027159;InterPro:IPR016024;InterPro:IPR015172;InterPro:IPR003890,PARKENT|GeneID=OUR12_029444-T1|Product=hypothetical protein|Dbxref=InterPro:IPR039753;PFAM:PF08242;PFAM:PF13649;PFAM:PF08241;InterPro:IPR029063;PFAM:PF03291;InterPro:IPR004971;PFAM:PF13847
GO:0005846	PARKENT|GeneID=OUR12_009095-T1|Product=Nucleic acid dioxygenase ALKBH1|Dbxref=PFAM:PF02854;InterPro:IPR027159;InterPro:IPR016024;InterPro:IPR015172;InterPro:IPR003890,PARKENT|GeneID=OUR12_018047-T1|Product=hypothetical protein|Dbxref=InterPro:IPR035979;PFAM:PF00076;InterPro:IPR012677;InterPro:IPR027157;InterPro:IPR000504;InterPro:IPR034148
GO:0005847	PARKENT|GeneID=OUR12_000752-T1|Product=hypothetical protein|Dbxref=InterPro:IPR034772;InterPro:IPR035979;InterPro:IPR012677;InterPro:IPR000504;PFAM:PF00076,PARKENT|GeneID=OUR12_008929-T1|Product=hypothetical protein|Dbxref=InterPro:IPR006811;PFAM:PF04722,PARKENT|GeneID=OUR12_016149-T1|Product=hypothetical protein|Dbxref=,PARKENT|GeneID=OUR12_018954-T1|Product=hypothetical protein|Dbxref=InterPro:…
GO:0005848	PARKENT|GeneID=OUR12_025834-T1|Product=hypothetical protein|Dbxref=InterPro:IPR044633,PARKENT|GeneID=OUR12_025835-T1|Product=hypothetical protein|Dbxref=InterPro:IPR044633;InterPro:IPR036322;InterPro:IPR015943;InterPro:IPR001680,PARKENT|GeneID=OUR12_025836-T1|Product=Cleavage stimulation factor subunit 50|Dbxref=InterPro:IPR036322;InterPro:IPR001680;PFAM:PF00400;InterPro:IPR044633;InterPro:IPR015…
GO:0005849	PARKENT|GeneID=OUR12_013174-T1|Product=hypothetical protein|Dbxref=InterPro:IPR013087;InterPro:IPR006569;PFAM:PF04818;InterPro:IPR047415;PFAM:PF23228;InterPro:IPR045154;InterPro:IPR008942,PARKENT|GeneID=OUR12_015013-T1|Product=hypothetical protein|Dbxref=InterPro:IPR013087;InterPro:IPR006569;PFAM:PF04818;InterPro:IPR047415;PFAM:PF23228;InterPro:IPR045154;InterPro:IPR008942,PARKENT|GeneID=OUR12_01…
GO:0005850	PARKENT|GeneID=OUR12_008641-T1|Product=hypothetical protein|Dbxref=InterPro:IPR012340;InterPro:IPR044126;InterPro:IPR024055;InterPro:IPR011488;InterPro:IPR024054;PFAM:PF07541;InterPro:IPR003029;PFAM:PF00575,PARKENT|GeneID=OUR12_008748-T1|Product=hypothetical protein|Dbxref=InterPro:IPR045196;InterPro:IPR016189;InterPro:IPR016190;InterPro:IPR002735;PFAM:PF01873,PARKENT|GeneID=OUR12_016315-T1|Produ…
GO:0005851	PARKENT|GeneID=OUR12_005481-T1|Product=hypothetical protein|Dbxref=InterPro:IPR051960,PARKENT|GeneID=OUR12_013768-T1|Product=hypothetical protein|Dbxref=InterPro:IPR051501;InterPro:IPR000649;PFAM:PF01008;InterPro:IPR042528;InterPro:IPR042529;InterPro:IPR037171,PARKENT|GeneID=OUR12_020421-T1|Product=hypothetical protein|Dbxref=InterPro:IPR000649;PFAM:PF01008;InterPro:IPR042529;InterPro:IPR037171;I…
GO:0005852	PARKENT|GeneID=OUR12_000728-T1|Product=Eukaryotic translation initiation factor 3 subunit I|Dbxref=InterPro:IPR036322;InterPro:IPR020472;InterPro:IPR019775;PFAM:PF00400;InterPro:IPR001680;InterPro:IPR027525;PFAM:PF24805;InterPro:IPR015943,PARKENT|GeneID=OUR12_004707-T1|Product=hypothetical protein|Dbxref=InterPro:IPR000717;PFAM:PF10255;InterPro:IPR019382,PARKENT|GeneID=OUR12_005044-T1|Product=Euk…
GO:0005853	PARKENT|GeneID=OUR12_008962-T1|Product=hypothetical protein|Dbxref=InterPro:IPR036219;InterPro:IPR049720;InterPro:IPR036282;InterPro:IPR001326;PFAM:PF00736;InterPro:IPR014717;InterPro:IPR014038,PARKENT|GeneID=OUR12_025401-T1|Product=hypothetical protein|Dbxref=InterPro:IPR036219;InterPro:IPR049720;InterPro:IPR036282;InterPro:IPR001326;PFAM:PF00736;InterPro:IPR014717;InterPro:IPR014038
GO:0005854	PARKENT|GeneID=OUR12_012435-T1|Product=hypothetical protein|Dbxref=PFAM:PF19026;PFAM:PF01849;InterPro:IPR016641;InterPro:IPR038187;InterPro:IPR002715;InterPro:IPR044034,PARKENT|GeneID=OUR12_020254-T1|Product=hypothetical protein|Dbxref=PFAM:PF19026;PFAM:PF01849;InterPro:IPR016641;InterPro:IPR038187;InterPro:IPR002715;InterPro:IPR044034,PARKENT|GeneID=OUR12_025117-T1|Product=hypothetical protein|D…
GO:0005856	PARKENT|GeneID=OUR12_003316-T1|Product=GTP-binding protein Rho1|Dbxref=InterPro:IPR003578;InterPro:IPR027417;InterPro:IPR005225;PFAM:PF00071;InterPro:IPR001806;PFAM:PF08477,PARKENT|GeneID=OUR12_005753-T1|Product=Rac-like GTP-binding protein arac1|Dbxref=InterPro:IPR003578;InterPro:IPR027417;InterPro:IPR005225;PFAM:PF00071;InterPro:IPR001806;PFAM:PF08477,PARKENT|GeneID=OUR12_006072-T1|Product=Kine…
GO:0005868	PARKENT|GeneID=OUR12_006100-T1|Product=Dynein light chain Tctex-type|Dbxref=InterPro:IPR019763;InterPro:IPR037177;PFAM:PF01221;InterPro:IPR001372,PARKENT|GeneID=OUR12_014152-T1|Product=hypothetical protein|Dbxref=InterPro:IPR037177;PFAM:PF01221;InterPro:IPR001372,PARKENT|GeneID=OUR12_017001-T1|Product=hypothetical protein|Dbxref=InterPro:IPR037177;PFAM:PF01221;InterPro:IPR001372,PARKENT|GeneID=OU…
GO:0005871	PARKENT|GeneID=OUR12_000831-T1|Product=hypothetical protein|Dbxref=PFAM:PF16796;InterPro:IPR027417;InterPro:IPR001752;InterPro:IPR027640;InterPro:IPR036961,PARKENT|GeneID=OUR12_006944-T1|Product=hypothetical protein|Dbxref=PFAM:PF00225;InterPro:IPR027417;InterPro:IPR001752;InterPro:IPR027640;InterPro:IPR036961,PARKENT|GeneID=OUR12_024831-T1|Product=hypothetical protein|Dbxref=PFAM:PF16796;PFAM:PF…
GO:0005874	PARKENT|GeneID=OUR12_000634-T1|Product=Phragmoplastin drp1c|Dbxref=InterPro:IPR027417;PFAM:PF01031;InterPro:IPR030381;InterPro:IPR000375;PFAM:PF02212;InterPro:IPR003130;InterPro:IPR020850;InterPro:IPR019762;PFAM:PF00350;InterPro:IPR022812;InterPro:IPR001401;InterPro:IPR045063,PARKENT|GeneID=OUR12_000831-T1|Product=hypothetical protein|Dbxref=PFAM:PF16796;InterPro:IPR027417;InterPro:IPR001752;Inte…
GO:0005875	PARKENT|GeneID=OUR12_002802-T1|Product=hypothetical protein|Dbxref=InterPro:IPR036961;InterPro:IPR027640;InterPro:IPR027417,PARKENT|GeneID=OUR12_006100-T1|Product=Dynein light chain Tctex-type|Dbxref=InterPro:IPR019763;InterPro:IPR037177;PFAM:PF01221;InterPro:IPR001372,PARKENT|GeneID=OUR12_011420-T1|Product=Kinesin-like protein KIN-4A|Dbxref=PFAM:PF16796;PFAM:PF00225;InterPro:IPR027417;PFAM:PF257…
GO:0005876	PARKENT|GeneID=OUR12_002358-T1|Product=hypothetical protein|Dbxref=PFAM:PF16796;PFAM:PF00225;InterPro:IPR047149;PFAM:PF00514;InterPro:IPR027417;InterPro:IPR001752;InterPro:IPR000225;InterPro:IPR011989;InterPro:IPR036961;InterPro:IPR019821;InterPro:IPR016024,PARKENT|GeneID=OUR12_004344-T1|Product=Phosphatidylinositol:ceramide phosphoinositol transferase (IPC synthase)|Dbxref=InterPro:IPR030616;Int…
GO:0005880	PARKENT|GeneID=OUR12_002348-T1|Product=hypothetical protein|Dbxref=InterPro:IPR009675;InterPro:IPR027330;PFAM:PF12214,PARKENT|GeneID=OUR12_003871-T1|Product=hypothetical protein|Dbxref=PFAM:PF04484;InterPro:IPR007573,PARKENT|GeneID=OUR12_005242-T1|Product=hypothetical protein|Dbxref=InterPro:IPR009675;PFAM:PF06886;InterPro:IPR027329,PARKENT|GeneID=OUR12_007685-T1|Product=hypothetical protein|Dbxr…
GO:0005881	PARKENT|GeneID=OUR12_001125-T1|Product=Microtubule-associated protein RP/EB member 1B|Dbxref=PFAM:PF03271;InterPro:IPR004953;InterPro:IPR001715;InterPro:IPR027328;InterPro:IPR036133;InterPro:IPR036872,PARKENT|GeneID=OUR12_006381-T1|Product=hypothetical protein|Dbxref=InterPro:IPR011989;InterPro:IPR024395;PFAM:PF12348;InterPro:IPR016024,PARKENT|GeneID=OUR12_008827-T1|Product=hypothetical protein|D…
GO:0005884	PARKENT|GeneID=OUR12_010701-T1|Product=Fimbrin-2|Dbxref=InterPro:IPR001715;InterPro:IPR011992;InterPro:IPR039959;InterPro:IPR036872;PFAM:PF00307,PARKENT|GeneID=OUR12_018166-T1|Product=Fimbrin-5|Dbxref=InterPro:IPR001715;InterPro:IPR011992;InterPro:IPR039959;InterPro:IPR036872;PFAM:PF00307,PARKENT|GeneID=OUR12_029681-T1|Product=Fimbrin-5|Dbxref=InterPro:IPR001715;InterPro:IPR011992;InterPro:IPR039…
GO:0005885	PARKENT|GeneID=OUR12_000098-T1|Product=Actin-related protein 3|Dbxref=InterPro:IPR043129;InterPro:IPR004000,PARKENT|GeneID=OUR12_000589-T1|Product=hypothetical protein|Dbxref=InterPro:IPR034666;InterPro:IPR007188,PARKENT|GeneID=OUR12_000591-T1|Product=Actin-related protein 2/3 complex subunit 2A|Dbxref=PFAM:PF04045;InterPro:IPR034666;InterPro:IPR007188,PARKENT|GeneID=OUR12_000754-T1|Product=hypot…
GO:0005886	PARKENT|GeneID=OUR12_000075-T1|Product=SNAP25 ous protein|Dbxref=InterPro:IPR044766;InterPro:IPR000727,PARKENT|GeneID=OUR12_000127-T1|Product=Catabolite repression protein cat5|Dbxref=PFAM:PF13520;InterPro:IPR029485;PFAM:PF13906;InterPro:IPR002293;PFAM:PF
GO:0005887	PARKENT|GeneID=OUR12_000550-T1|Product=Probable sulfate transporter 3.3|Dbxref=InterPro:IPR018045;InterPro:IPR002645;InterPro:IPR011547;PFAM:PF01740;InterPro:IPR036513;InterPro:IPR001902,PARKENT|GeneID=OUR12_000765-T1|Product=hypothetical protein|Dbxref=PFAM:PF00664;InterPro:IPR027417;InterPro:IPR003439;InterPro:IPR039421;InterPro:IPR036640;InterPro:IPR011527;PFAM:PF00005;InterPro:IPR017871;Inter…
GO:0005905	PARKENT|GeneID=OUR12_000582-T1|Product=hypothetical protein|Dbxref=InterPro:IPR011417;InterPro:IPR014712;InterPro:IPR045192;PFAM:PF07651;InterPro:IPR048050;InterPro:IPR008942;InterPro:IPR013809,PARKENT|GeneID=OUR12_000663-T1|Product=hypothetical protein|Dbxref=InterPro:IPR011417;InterPro:IPR014712;InterPro:IPR045192;PFAM:PF07651;InterPro:IPR008942;InterPro:IPR013809,PARKENT|GeneID=OUR12_000694-T1…
GO:0005938	PARKENT|GeneID=OUR12_004341-T1|Product=Glutamate 5-kinase|Dbxref=InterPro:IPR048278;InterPro:IPR036140;PFAM:PF00235;InterPro:IPR005455;InterPro:IPR027310,PARKENT|GeneID=OUR12_014067-T1|Product=Profilin-1|Dbxref=InterPro:IPR048278;InterPro:IPR036140;PFAM:PF00235;InterPro:IPR005455;InterPro:IPR027310,PARKENT|GeneID=OUR12_016773-T1|Product=hypothetical protein|Dbxref=InterPro:IPR048278;InterPro:IPR0…
GO:0005946	PARKENT|GeneID=OUR12_012339-T1|Product=hypothetical protein|Dbxref=InterPro:IPR003337;PFAM:PF02358;InterPro:IPR001830
GO:0005947	PARKENT|GeneID=OUR12_006018-T1|Product=hypothetical protein|Dbxref=InterPro:IPR001017;PFAM:PF00676;InterPro:IPR029061;InterPro:IPR050771,PARKENT|GeneID=OUR12_007828-T1|Product=hypothetical protein|Dbxref=InterPro:IPR009014;InterPro:IPR033248;PFAM:PF02780;PFAM:PF02779;InterPro:IPR029061;InterPro:IPR005475,PARKENT|GeneID=OUR12_028003-T1|Product=hypothetical protein|Dbxref=InterPro:IPR001017;PFAM:PF…
GO:0005948	PARKENT|GeneID=OUR12_022225-T1|Product=hypothetical protein|Dbxref=PFAM:PF02775;InterPro:IPR011766;InterPro:IPR000399;PFAM:PF02776;InterPro:IPR012846;InterPro:IPR045229;InterPro:IPR039368;InterPro:IPR029035;InterPro:IPR012001;InterPro:IPR012000;PFAM:PF00205;InterPro:IPR029061,PARKENT|GeneID=OUR12_025377-T1|Product=Agglutinin-like protein 1 precursor|Dbxref=InterPro:IPR045229;InterPro:IPR029035;In…
GO:0005951	PARKENT|GeneID=OUR12_005922-T1|Product=hypothetical protein|Dbxref=PFAM:PF00988;InterPro:IPR006274;InterPro:IPR017926;InterPro:IPR029062;InterPro:IPR035686;PFAM:PF00117;InterPro:IPR036480;InterPro:IPR002474
GO:0005952	PARKENT|GeneID=OUR12_016826-T1|Product=hypothetical protein|Dbxref=InterPro:IPR000719;InterPro:IPR018490;InterPro:IPR011009;InterPro:IPR036457;PFAM:PF00481;InterPro:IPR001932;InterPro:IPR014710;InterPro:IPR000222;PFAM:PF00069;PFAM:PF00027;PFAM:PF07714;InterPro:IPR000595
GO:0005953	PARKENT|GeneID=OUR12_007545-T1|Product=hypothetical protein|Dbxref=PFAM:PF01239;InterPro:IPR002088,PARKENT|GeneID=OUR12_019543-T1|Product=hypothetical protein|Dbxref=InterPro:IPR041960;InterPro:IPR008930;InterPro:IPR001330;InterPro:IPR045089;PFAM:PF00432
GO:0005956	PARKENT|GeneID=OUR12_011331-T1|Product=Casein kinase II subunit alpha-4, chloroplastic|Dbxref=InterPro:IPR045216;InterPro:IPR008271;PFAM:PF00069;InterPro:IPR017441;InterPro:IPR000719;PFAM:PF07714;InterPro:IPR011009,PARKENT|GeneID=OUR12_011347-T1|Product=Casein kinase II subunit alpha|Dbxref=InterPro:IPR045216;InterPro:IPR008271;PFAM:PF00069;InterPro:IPR017441;InterPro:IPR000719;PFAM:PF07714;Inter…
GO:0005958	PARKENT|GeneID=OUR12_006808-T1|Product=DNA repair protein xrcc4|Dbxref=PFAM:PF21924;InterPro:IPR038051;InterPro:IPR053962;PFAM:PF06632;InterPro:IPR053961;InterPro:IPR010585;PFAM:PF09302;InterPro:IPR014751;InterPro:IPR009089
GO:0005960	PARKENT|GeneID=OUR12_000210-T1|Product=hypothetical protein|Dbxref=InterPro:IPR033753;InterPro:IPR011053;InterPro:IPR002930,PARKENT|GeneID=OUR12_002706-T1|Product=hypothetical protein|Dbxref=InterPro:IPR015422;InterPro:IPR020581;InterPro:IPR049316,PARKENT|GeneID=OUR12_002715-T1|Product=hypothetical protein|Dbxref=InterPro:IPR011053;PFAM:PF01597;InterPro:IPR003016;InterPro:IPR033753;InterPro:IPR01…
GO:0005965	PARKENT|GeneID=OUR12_007545-T1|Product=hypothetical protein|Dbxref=PFAM:PF01239;InterPro:IPR002088,PARKENT|GeneID=OUR12_022486-T1|Product=hypothetical protein|Dbxref=InterPro:IPR008930;InterPro:IPR001330;InterPro:IPR026872;InterPro:IPR045089;PFAM:PF00432
GO:0005967	PARKENT|GeneID=OUR12_001706-T1|Product=hypothetical protein|Dbxref=InterPro:IPR009014;InterPro:IPR033248;PFAM:PF02780;PFAM:PF02779;InterPro:IPR027110;InterPro:IPR005475;InterPro:IPR029061,PARKENT|GeneID=OUR12_004542-T1|Product=hypothetical protein|Dbxref=InterPro:IPR027110;InterPro:IPR029061,PARKENT|GeneID=OUR12_025306-T1|Product=hypothetical protein|Dbxref=InterPro:IPR009014;InterPro:IPR033248;P…
GO:0005968	PARKENT|GeneID=OUR12_005860-T1|Product=hypothetical protein|Dbxref=PFAM:PF22603;InterPro:IPR001738;InterPro:IPR018203;InterPro:IPR036188,PARKENT|GeneID=OUR12_011985-T1|Product=hypothetical protein|Dbxref=InterPro:IPR008930;InterPro:IPR045089,PARKENT|GeneID=OUR12_018406-T1|Product=hypothetical protein|Dbxref=InterPro:IPR008930;InterPro:IPR001330;InterPro:IPR045089;InterPro:IPR026873;PFAM:PF00432,P…
GO:0005971	PARKENT|GeneID=OUR12_011630-T1|Product=ribonucleotide-diphosphate reductase subunit rnr1|Dbxref=PFAM:PF00317;InterPro:IPR013346;InterPro:IPR008926;PFAM:PF03477;InterPro:IPR039718;PFAM:PF02867;InterPro:IPR005144;InterPro:IPR000788;InterPro:IPR013509,PARKENT|GeneID=OUR12_011631-T1|Product=hypothetical protein|Dbxref=InterPro:IPR008926;InterPro:IPR039718;InterPro:IPR000788
GO:0005975	PARKENT|GeneID=OUR12_000030-T1|Product=Probable 6-phosphogluconolactonase 1|Dbxref=InterPro:IPR006148;InterPro:IPR039104;InterPro:IPR005900;PFAM:PF01182;InterPro:IPR037171,PARKENT|GeneID=OUR12_000037-T1|Product=hypothetical protein|Dbxref=InterPro:IPR0066
GO:0005977	PARKENT|GeneID=OUR12_005942-T1|Product=UTP--glucose-1-phosphate uridylyltransferase|Dbxref=InterPro:IPR029044;InterPro:IPR016267;InterPro:IPR002618;PFAM:PF01704
GO:0005978	PARKENT|GeneID=OUR12_001370-T1|Product=Glucose-1-phosphate adenylyltransferase|Dbxref=InterPro:IPR029044;InterPro:IPR011831;InterPro:IPR005835;InterPro:IPR005836,PARKENT|GeneID=OUR12_001456-T1|Product=hypothetical protein|Dbxref=InterPro:IPR029044;InterPro:IPR011831;InterPro:IPR005835,PARKENT|GeneID=OUR12_003524-T1|Product=Glucose-1-phosphate adenylyltransferase large subunit 1|Dbxref=InterPro:IP…
GO:0005980	PARKENT|GeneID=OUR12_000084-T1|Product=Transcription factor stp1|Dbxref=InterPro:IPR035090;InterPro:IPR000811,PARKENT|GeneID=OUR12_008517-T1|Product=hypothetical protein|Dbxref=PFAM:PF00343;InterPro:IPR011833;InterPro:IPR035090;InterPro:IPR000811,PARKENT|GeneID=OUR12_015660-T1|Product=hypothetical protein|Dbxref=PFAM:PF00343;InterPro:IPR011833;InterPro:IPR035090;InterPro:IPR000811,PARKENT|GeneID=…
GO:0005982	PARKENT|GeneID=OUR12_006749-T1|Product=hypothetical protein|Dbxref=InterPro:IPR052495,PARKENT|GeneID=OUR12_013149-T1|Product=hypothetical protein|Dbxref=,PARKENT|GeneID=OUR12_013150-T1|Product=hypothetical protein|Dbxref=InterPro:IPR004193;InterPro:IPR013783;InterPro:IPR014756;PFAM:PF02922,PARKENT|GeneID=OUR12_013151-T1|Product=hypothetical protein|Dbxref=InterPro:IPR017853;InterPro:IPR006048;Int…
GO:0005983	PARKENT|GeneID=OUR12_019332-T1|Product=Phosphoglucan phosphatase lsf2, chloroplastic|Dbxref=InterPro:IPR029021;InterPro:IPR052832;InterPro:IPR020422;PFAM:PF00782;InterPro:IPR045204;InterPro:IPR000387;PFAM:PF22784;InterPro:IPR000340,PARKENT|GeneID=OUR12_019923-T1|Product=Phosphoglucan phosphatase DSP4, chloroplastic|Dbxref=InterPro:IPR029021;PFAM:PF16561;InterPro:IPR052832;InterPro:IPR020422;PFAM:…
GO:0005985	PARKENT|GeneID=OUR12_005169-T1|Product=Sucrose synthase 6|Dbxref=PFAM:PF24861;InterPro:IPR000368;InterPro:IPR001296;PFAM:PF13692;InterPro:IPR012820;PFAM:PF24862;PFAM:PF00862;PFAM:PF00534,PARKENT|GeneID=OUR12_006120-T1|Product=Sucrose synthase 2|Dbxref=InterPro:IPR000368;InterPro:IPR001296;PFAM:PF13692;InterPro:IPR012820;PFAM:PF24862;PFAM:PF00534,PARKENT|GeneID=OUR12_006121-T1|Product=Sucrose synt…
GO:0005986	PARKENT|GeneID=OUR12_012083-T1|Product=Pre-mRNA-splicing factor spp2|Dbxref=InterPro:IPR006379;PFAM:PF08282;InterPro:IPR006380;InterPro:IPR012847;InterPro:IPR023214;PFAM:PF05116;InterPro:IPR051518;InterPro:IPR036412;PFAM:PF08472;InterPro:IPR032710;InterPro:IPR013679,PARKENT|GeneID=OUR12_012894-T1|Product=hypothetical protein|Dbxref=InterPro:IPR020548;PFAM:PF18913;InterPro:IPR000146;InterPro:IPR04…
GO:0005987	PARKENT|GeneID=OUR12_003246-T1|Product=hypothetical protein|Dbxref=InterPro:IPR024746;InterPro:IPR008928;PFAM:PF12899;InterPro:IPR012341,PARKENT|GeneID=OUR12_006265-T1|Product=nuclear integrity protein 1|Dbxref=InterPro:IPR024746;InterPro:IPR008928;PFAM:PF12899;InterPro:IPR012341,PARKENT|GeneID=OUR12_007220-T1|Product=Alkaline neutral invertase|Dbxref=InterPro:IPR024746,PARKENT|GeneID=OUR12_00892…
GO:0005990	PARKENT|GeneID=OUR12_020360-T1|Product=hypothetical protein|Dbxref=InterPro:IPR006101;InterPro:IPR017853;InterPro:IPR014718;InterPro:IPR023232;InterPro:IPR023230;PFAM:PF02929;PFAM:PF16353;InterPro:IPR006102;InterPro:IPR036156;PFAM:PF00703;InterPro:IPR011013;PFAM:PF02836;InterPro:IPR004199;InterPro:IPR013783;InterPro:IPR006103;InterPro:IPR050347;InterPro:IPR032312,PARKENT|GeneID=OUR12_020362-T1|Pr…
GO:0005991	PARKENT|GeneID=OUR12_002043-T1|Product=Trehalase|Dbxref=PFAM:PF01204;InterPro:IPR008928;InterPro:IPR001661;PFAM:PF22422;InterPro:IPR012341;InterPro:IPR018232
GO:0005992	PARKENT|GeneID=OUR12_000648-T1|Product=Alpha,alpha-trehalose-phosphate synthase [UDP-forming] 6|Dbxref=InterPro:IPR006379;PFAM:PF00982;InterPro:IPR023214;InterPro:IPR036412;PFAM:PF02358;InterPro:IPR001830;InterPro:IPR003337,PARKENT|GeneID=OUR12_000956-T1|Product=Probable alpha,alpha-trehalose-phosphate synthase [UDP-forming] 10|Dbxref=InterPro:IPR006379;PFAM:PF00982;InterPro:IPR023214;InterPro:IP…
GO:0005993	PARKENT|GeneID=OUR12_002043-T1|Product=Trehalase|Dbxref=PFAM:PF01204;InterPro:IPR008928;InterPro:IPR001661;PFAM:PF22422;InterPro:IPR012341;InterPro:IPR018232
GO:0005997	PARKENT|GeneID=OUR12_027307-T1|Product=Xylulose kinase 2|Dbxref=PFAM:PF00370;InterPro:IPR042024;InterPro:IPR043129;InterPro:IPR000577;InterPro:IPR018484;InterPro:IPR018485
GO:0006000	PARKENT|GeneID=OUR12_007581-T1|Product=Fructokinase-2|Dbxref=InterPro:IPR050306;InterPro:IPR002139;InterPro:IPR002173;PFAM:PF00294;InterPro:IPR029056;InterPro:IPR011611,PARKENT|GeneID=OUR12_008611-T1|Product=hypothetical protein|Dbxref=InterPro:IPR013784;PFAM:PF01591;InterPro:IPR027417;InterPro:IPR029033;InterPro:IPR013078;InterPro:IPR001345;InterPro:IPR003094;PFAM:PF00300;InterPro:IPR002044;Inte…
GO:0006002	PARKENT|GeneID=OUR12_004343-T1|Product=ATP-dependent 6-phosphofructokinase 3|Dbxref=PFAM:PF00365;InterPro:IPR050929;InterPro:IPR000023;InterPro:IPR022953;InterPro:IPR035966;InterPro:IPR012004,PARKENT|GeneID=OUR12_011097-T1|Product=ATP-dependent 6-phosphofructokinase 5, chloroplastic|Dbxref=PFAM:PF00365;InterPro:IPR050929;InterPro:IPR000023;InterPro:IPR022953;InterPro:IPR035966,PARKENT|GeneID=OUR1…
GO:0006003	PARKENT|GeneID=OUR12_008611-T1|Product=hypothetical protein|Dbxref=InterPro:IPR013784;PFAM:PF01591;InterPro:IPR027417;InterPro:IPR029033;InterPro:IPR013078;InterPro:IPR001345;InterPro:IPR003094;PFAM:PF00300;InterPro:IPR002044;InterPro:IPR013079;InterPro:IPR013783
GO:0006004	PARKENT|GeneID=OUR12_009146-T1|Product=L-fucose permease Glucose/galactose transporter|Dbxref=InterPro:IPR000933;InterPro:IPR008979;InterPro:IPR017853;PFAM:PF01120,PARKENT|GeneID=OUR12_024654-T1|Product=hypothetical protein|Dbxref=InterPro:IPR000933;InterPro:IPR008979;InterPro:IPR017853;PFAM:PF01120,PARKENT|GeneID=OUR12_024655-T1|Product=hypothetical protein|Dbxref=InterPro:IPR000933;InterPro:IPR…
GO:0006006	PARKENT|GeneID=OUR12_001502-T1|Product=Glyceraldehyde-3-phosphate dehydrogenase 2, cytosolic|Dbxref=PFAM:PF00044;InterPro:IPR020828;InterPro:IPR020829;InterPro:IPR036291;InterPro:IPR020831;InterPro:IPR006424;PFAM:PF02800;InterPro:IPR020830,PARKENT|GeneID=OUR12_001678-T1|Product=Glucose-6-phosphate 1-dehydrogenase|Dbxref=InterPro:IPR022675;PFAM:PF02781;InterPro:IPR019796;InterPro:IPR001282;InterPr…
GO:0006007	PARKENT|GeneID=OUR12_011857-T1|Product=2,3-bisphosphoglycerate-independent phosphoglycerate mutase|Dbxref=InterPro:IPR011258;InterPro:IPR005995;InterPro:IPR006124;PFAM:PF06415;InterPro:IPR017850;InterPro:IPR036646;PFAM:PF01676
GO:0006011	PARKENT|GeneID=OUR12_005942-T1|Product=UTP--glucose-1-phosphate uridylyltransferase|Dbxref=InterPro:IPR029044;InterPro:IPR016267;InterPro:IPR002618;PFAM:PF01704
GO:0006012	PARKENT|GeneID=OUR12_001992-T1|Product=UDP-glucose 4-epimerase|Dbxref=PFAM:PF02719;InterPro:IPR016040;PFAM:PF04321;PFAM:PF16363;InterPro:IPR005886;InterPro:IPR036291;PFAM:PF01370;PFAM:PF01073,PARKENT|GeneID=OUR12_001995-T1|Product=UDP-glucose 4-epimerase|Dbxref=PFAM:PF02719;InterPro:IPR016040;PFAM:PF04321;PFAM:PF16363;InterPro:IPR005886;InterPro:IPR036291;PFAM:PF01370;PFAM:PF01073,PARKENT|GeneID=…
GO:0006013	PARKENT|GeneID=OUR12_005736-T1|Product=hypothetical protein|Dbxref=InterPro:IPR000602;InterPro:IPR028995;InterPro:IPR048534;PFAM:PF09261;PFAM:PF21260;InterPro:IPR013780;PFAM:PF01074;InterPro:IPR011682;InterPro:IPR015341;PFAM:PF17677;InterPro:IPR041147;InterPro:IPR050843;InterPro:IPR011013;InterPro:IPR011330;PFAM:PF07748;InterPro:IPR037094;InterPro:IPR027291,PARKENT|GeneID=OUR12_016285-T1|Product=…
GO:0006014	PARKENT|GeneID=OUR12_028993-T1|Product=hypothetical protein|Dbxref=InterPro:IPR011877;InterPro:IPR002139;InterPro:IPR002173;PFAM:PF00294;InterPro:IPR029056;InterPro:IPR011611
GO:0006015	PARKENT|GeneID=OUR12_000827-T1|Product=ribose phosphate diphosphokinase subunit prs3|Dbxref=InterPro:IPR029057;InterPro:IPR005946;PFAM:PF00156;InterPro:IPR000836;PFAM:PF13793;InterPro:IPR029099,PARKENT|GeneID=OUR12_002658-T1|Product=ribose-phosphate pyrophosphokinase 1|Dbxref=InterPro:IPR029057;InterPro:IPR005946;PFAM:PF00156;PFAM:PF14572;PFAM:PF13793;InterPro:IPR000836;InterPro:IPR000842;InterPr…
GO:0006020	PARKENT|GeneID=OUR12_000190-T1|Product=hypothetical protein|Dbxref=PFAM:PF00459;InterPro:IPR020550;InterPro:IPR033942;InterPro:IPR000760,PARKENT|GeneID=OUR12_000191-T1|Product=hypothetical protein|Dbxref=InterPro:IPR000760,PARKENT|GeneID=OUR12_015319-T1|Product=Small subunit (SSU) processome component|Dbxref=PFAM:PF00459;InterPro:IPR033942;InterPro:IPR020552;InterPro:IPR000760;InterPro:IPR020583;…
GO:0006024	PARKENT|GeneID=OUR12_000078-T1|Product=UDP-glucose 6-dehydrogenase 1|Dbxref=InterPro:IPR014027;PFAM:PF00984;InterPro:IPR028356;InterPro:IPR036220;InterPro:IPR001732;InterPro:IPR014026;PFAM:PF03721;InterPro:IPR036291;InterPro:IPR008927;InterPro:IPR017476;PFAM:PF03720,PARKENT|GeneID=OUR12_005382-T1|Product=hypothetical protein|Dbxref=InterPro:IPR028356;InterPro:IPR029346;InterPro:IPR001732,PARKENT|…
GO:0006032	PARKENT|GeneID=OUR12_003405-T1|Product=Basic endochitinase|Dbxref=PFAM:PF00182;PFAM:PF00187;InterPro:IPR001002;InterPro:IPR023346;InterPro:IPR018371;InterPro:IPR000726;InterPro:IPR036861,PARKENT|GeneID=OUR12_005822-T1|Product=hypothetical protein|Dbxref=InterPro:IPR023346;InterPro:IPR000726,PARKENT|GeneID=OUR12_005823-T1|Product=hypothetical protein|Dbxref=InterPro:IPR023346;InterPro:IPR000726,PA…
GO:0006044	PARKENT|GeneID=OUR12_000802-T1|Product=hypothetical protein|Dbxref=PFAM:PF04724;InterPro:IPR006813,PARKENT|GeneID=OUR12_017067-T1|Product=hypothetical protein|Dbxref=PFAM:PF04724;InterPro:IPR006813,PARKENT|GeneID=OUR12_022377-T1|Product=hypothetical protein|Dbxref=PFAM:PF04724;InterPro:IPR006813
GO:0006048	PARKENT|GeneID=OUR12_000155-T1|Product=UDP-N-acetylglucosamine diphosphorylase 1|Dbxref=InterPro:IPR029044;InterPro:IPR002618;InterPro:IPR039741;PFAM:PF01704,PARKENT|GeneID=OUR12_002669-T1|Product=hypothetical protein|Dbxref=PFAM:PF21405;InterPro:IPR049022;InterPro:IPR016055;PFAM:PF21404;PFAM:PF00408;InterPro:IPR005843;PFAM:PF02880;InterPro:IPR036900;InterPro:IPR016657;InterPro:IPR049023,PARKENT|…
GO:0006071	PARKENT|GeneID=OUR12_003152-T1|Product=D-ribulose kinase|Dbxref=InterPro:IPR043129;InterPro:IPR018485;InterPro:IPR000577;PFAM:PF02782,PARKENT|GeneID=OUR12_014428-T1|Product=hypothetical protein|Dbxref=PFAM:PF00370;PFAM:PF02782;InterPro:IPR043129;InterPro:IPR005999;InterPro:IPR000577;InterPro:IPR018484;InterPro:IPR018485;InterPro:IPR018483,PARKENT|GeneID=OUR12_014657-T1|Product=hypothetical protei…
GO:0006072	PARKENT|GeneID=OUR12_013724-T1|Product=Glycerol-3-phosphate dehydrogenase [NAD(+)] gpdhc1, cytosolic|Dbxref=PFAM:PF01210;InterPro:IPR006109;InterPro:IPR011128;InterPro:IPR013328;InterPro:IPR036291;PFAM:PF07479;InterPro:IPR008927;InterPro:IPR006168,PARKENT|GeneID=OUR12_014428-T1|Product=hypothetical protein|Dbxref=PFAM:PF00370;PFAM:PF02782;InterPro:IPR043129;InterPro:IPR005999;InterPro:IPR000577;I…
GO:0006075	PARKENT|GeneID=OUR12_005998-T1|Product=Callose synthase 5|Dbxref=PFAM:PF25968;InterPro:IPR026899;InterPro:IPR023175;InterPro:IPR003440;InterPro:IPR039431;PFAM:PF14288;PFAM:PF04652,PARKENT|GeneID=OUR12_007935-T1|Product=Callose synthase 9|Dbxref=InterPro:IPR003440,PARKENT|GeneID=OUR12_007936-T1|Product=Callose synthase 9|Dbxref=InterPro:IPR003440,PARKENT|GeneID=OUR12_007937-T1|Product=Callose synt…
GO:0006081	PARKENT|GeneID=OUR12_005647-T1|Product=Aldehyde dehydrogenase 3 member F1|Dbxref=PFAM:PF00171;InterPro:IPR012394;InterPro:IPR016162;InterPro:IPR015590;InterPro:IPR016163;InterPro:IPR016161,PARKENT|GeneID=OUR12_008046-T1|Product=hypothetical protein|Dbxref=InterPro:IPR016162;InterPro:IPR016161;InterPro:IPR012394,PARKENT|GeneID=OUR12_008048-T1|Product=hypothetical protein|Dbxref=InterPro:IPR012394;…
GO:0006084	PARKENT|GeneID=OUR12_002304-T1|Product=hypothetical protein|Dbxref=InterPro:IPR013746;InterPro:IPR010122;InterPro:IPR013528;InterPro:IPR016039;PFAM:PF08540;PFAM:PF01154,PARKENT|GeneID=OUR12_024568-T1|Product=hypothetical protein|Dbxref=InterPro:IPR013528;InterPro:IPR016039
GO:0006085	PARKENT|GeneID=OUR12_000868-T1|Product=ATP-citrate synthase alpha chain protein 1|Dbxref=InterPro:IPR002020;PFAM:PF08442;InterPro:IPR016102;InterPro:IPR032263;InterPro:IPR013650;PFAM:PF24948;PFAM:PF16114,PARKENT|GeneID=OUR12_006214-T1|Product=ATP-citrate synthase beta chain protein 2|Dbxref=InterPro:IPR002020;InterPro:IPR017440;InterPro:IPR033847;InterPro:IPR016102;InterPro:IPR005811;PFAM:PF00549…
GO:0006086	PARKENT|GeneID=OUR12_000359-T1|Product=Lta2p|Dbxref=InterPro:IPR011053;PFAM:PF02817;InterPro:IPR004167;InterPro:IPR036625;InterPro:IPR001078;InterPro:IPR023213;InterPro:IPR045257;PFAM:PF00198,PARKENT|GeneID=OUR12_001019-T1|Product=Pyruvate dehydrogenase E1 component subunit alpha-2, mitochondrial|Dbxref=InterPro:IPR001017;PFAM:PF02775;InterPro:IPR050642;PFAM:PF00676;InterPro:IPR029061;InterPro:IP…
GO:0006089	PARKENT|GeneID=OUR12_002448-T1|Product=hypothetical protein|Dbxref=InterPro:IPR022383;PFAM:PF00056;InterPro:IPR001236;InterPro:IPR015955;PFAM:PF02866;InterPro:IPR011304;InterPro:IPR036291;InterPro:IPR018177;InterPro:IPR001557,PARKENT|GeneID=OUR12_023519-T1|Product=hypothetical protein|Dbxref=InterPro:IPR022383;PFAM:PF00056;InterPro:IPR001236;InterPro:IPR015955;PFAM:PF02866;InterPro:IPR011304;Inte…
GO:0006090	PARKENT|GeneID=OUR12_002448-T1|Product=hypothetical protein|Dbxref=InterPro:IPR022383;PFAM:PF00056;InterPro:IPR001236;InterPro:IPR015955;PFAM:PF02866;InterPro:IPR011304;InterPro:IPR036291;InterPro:IPR018177;InterPro:IPR001557,PARKENT|GeneID=OUR12_002840-T1|Product=NADP-dependent malic enzyme|Dbxref=InterPro:IPR012302;InterPro:IPR036291,PARKENT|GeneID=OUR12_006507-T1|Product=hypothetical protein|D…
GO:0006094	PARKENT|GeneID=OUR12_003257-T1|Product=Triosephosphate isomerase, cytosolic|Dbxref=InterPro:IPR013785;InterPro:IPR000652;InterPro:IPR020861;InterPro:IPR035990;InterPro:IPR022896;PFAM:PF00121,PARKENT|GeneID=OUR12_008385-T1|Product=hypothetical protein|Dbxref=InterPro:IPR013785;InterPro:IPR000652;InterPro:IPR020861;InterPro:IPR035990;InterPro:IPR022896;PFAM:PF00121,PARKENT|GeneID=OUR12_009003-T1|Pr…
GO:0006096	PARKENT|GeneID=OUR12_000464-T1|Product=Fructose-bisphosphate aldolase 3, chloroplastic|Dbxref=InterPro:IPR000741;InterPro:IPR029768;PFAM:PF00274;InterPro:IPR013785,PARKENT|GeneID=OUR12_001502-T1|Product=Glyceraldehyde-3-phosphate dehydrogenase 2, cytosolic|Dbxref=PFAM:PF00044;InterPro:IPR020828;InterPro:IPR020829;InterPro:IPR036291;InterPro:IPR020831;InterPro:IPR006424;PFAM:PF02800;InterPro:IPR02…
GO:0006097	PARKENT|GeneID=OUR12_025429-T1|Product=hypothetical protein|Dbxref=InterPro:IPR019830;InterPro:IPR006252;InterPro:IPR011076;PFAM:PF20659;InterPro:IPR046363;InterPro:IPR001465;InterPro:IPR048356;InterPro:IPR044856;PFAM:PF20656;PFAM:PF01274;InterPro:IPR048355
GO:0006098	PARKENT|GeneID=OUR12_000030-T1|Product=Probable 6-phosphogluconolactonase 1|Dbxref=InterPro:IPR006148;InterPro:IPR039104;InterPro:IPR005900;PFAM:PF01182;InterPro:IPR037171,PARKENT|GeneID=OUR12_001347-T1|Product=6-phosphogluconate dehydrogenase, decarboxylating 2|Dbxref=InterPro:IPR006113;InterPro:IPR006115;PFAM:PF03446;PFAM:PF00393;InterPro:IPR013328;InterPro:IPR036291;InterPro:IPR006183;InterPro…
GO:0006099	PARKENT|GeneID=OUR12_000292-T1|Product=Phosphoenolpyruvate carboxylase 4|Dbxref=InterPro:IPR033129;InterPro:IPR015813;InterPro:IPR018129;InterPro:IPR022805;InterPro:IPR021135,PARKENT|GeneID=OUR12_001571-T1|Product=hypothetical protein|Dbxref=InterPro:IPR036291;InterPro:IPR010945,PARKENT|GeneID=OUR12_003390-T1|Product=isocitrate dehydrogenase (NAD(+)) idh1|Dbxref=InterPro:IPR004434;PFAM:PF00180;In…
GO:0006101	PARKENT|GeneID=OUR12_005782-T1|Product=Aconitate hydratase mitochondrial|Dbxref=InterPro:IPR000573;InterPro:IPR044137;InterPro:IPR006249;InterPro:IPR036008;PFAM:PF00694;PFAM:PF00330;InterPro:IPR015928;InterPro:IPR015931;InterPro:IPR018136;InterPro:IPR001030,PARKENT|GeneID=OUR12_018321-T1|Product=hypothetical protein|Dbxref=InterPro:IPR000573;InterPro:IPR044137;InterPro:IPR006249;InterPro:IPR03600…
GO:0006102	PARKENT|GeneID=OUR12_003390-T1|Product=isocitrate dehydrogenase (NAD(+)) idh1|Dbxref=InterPro:IPR004434;PFAM:PF00180;InterPro:IPR024084,PARKENT|GeneID=OUR12_005190-T1|Product=hypothetical protein|Dbxref=PFAM:PF00180;InterPro:IPR004790;InterPro:IPR019818;InterPro:IPR024084,PARKENT|GeneID=OUR12_005840-T1|Product=isocitrate dehydrogenase (NAD(+)) idh1|Dbxref=InterPro:IPR004434;PFAM:PF00180;InterPro:…
GO:0006104	PARKENT|GeneID=OUR12_010191-T1|Product=hypothetical protein|Dbxref=InterPro:IPR011761;InterPro:IPR005809;InterPro:IPR013815;InterPro:IPR013650;InterPro:IPR005811;PFAM:PF00549;InterPro:IPR016102;PFAM:PF08442;InterPro:IPR017866
GO:0006106	PARKENT|GeneID=OUR12_009867-T1|Product=fumarase fum1|Dbxref=InterPro:IPR008948;PFAM:PF00206;InterPro:IPR022761;PFAM:PF10415;InterPro:IPR000362;InterPro:IPR024083;InterPro:IPR018951;InterPro:IPR020557;InterPro:IPR005677,PARKENT|GeneID=OUR12_021007-T1|Product=fumarase fum1|Dbxref=InterPro:IPR008948;InterPro:IPR022761;PFAM:PF10415;InterPro:IPR000362;InterPro:IPR024083;InterPro:IPR018951;InterPro:IPR…
GO:0006107	PARKENT|GeneID=OUR12_001571-T1|Product=hypothetical protein|Dbxref=InterPro:IPR036291;InterPro:IPR010945,PARKENT|GeneID=OUR12_004480-T1|Product=Omega-amidase, chloroplastic|Dbxref=InterPro:IPR036526;InterPro:IPR045254;InterPro:IPR003010;PFAM:PF00795,PARKENT|GeneID=OUR12_010147-T1|Product=hypothetical protein|Dbxref=InterPro:IPR001236;PFAM:PF00056;InterPro:IPR010945;InterPro:IPR036291,PARKENT|Gene…
GO:0006108	PARKENT|GeneID=OUR12_001571-T1|Product=hypothetical protein|Dbxref=InterPro:IPR036291;InterPro:IPR010945,PARKENT|GeneID=OUR12_002840-T1|Product=NADP-dependent malic enzyme|Dbxref=InterPro:IPR012302;InterPro:IPR036291,PARKENT|GeneID=OUR12_003997-T1|Product=hypothetical protein|Dbxref=InterPro:IPR022383;PFAM:PF00056;InterPro:IPR001252;InterPro:IPR001236;InterPro:IPR015955;PFAM:PF02866;InterPro:IPR0…
GO:0006114	PARKENT|GeneID=OUR12_017657-T1|Product=glutathione synthase|Dbxref=PFAM:PF00702;PFAM:PF13419;InterPro:IPR023214;InterPro:IPR036412;PFAM:PF12710;InterPro:IPR045228;InterPro:IPR023198;InterPro:IPR006439,PARKENT|GeneID=OUR12_017952-T1|Product=hypothetical protein|Dbxref=PFAM:PF00702;PFAM:PF13419;InterPro:IPR023214;InterPro:IPR036412;PFAM:PF12710;InterPro:IPR041492;PFAM:PF13242;InterPro:IPR023198;Int…
GO:0006116	PARKENT|GeneID=OUR12_008592-T1|Product=Internal alternative NAD(P)H-ubiquinone oxidoreductase A1, mitochondrial|Dbxref=PFAM:PF07992;PFAM:PF00070;InterPro:IPR045024;PFAM:PF22366;InterPro:IPR036188;InterPro:IPR054585;InterPro:IPR023753,PARKENT|GeneID=OUR12_013724-T1|Product=Glycerol-3-phosphate dehydrogenase [NAD(+)] gpdhc1, cytosolic|Dbxref=PFAM:PF01210;InterPro:IPR006109;InterPro:IPR011128;InterP…
GO:0006120	PARKENT|GeneID=OUR12_003179-T1|Product=NADH dehydrogenase [ubiquinone] 1 beta subcomplex subunit 9|Dbxref=InterPro:IPR033034;InterPro:IPR045292;InterPro:IPR008011;PFAM:PF05347,PARKENT|GeneID=OUR12_003563-T1|Product=hypothetical protein|Dbxref=InterPro:IPR017900;PFAM:PF13187;PFAM:PF00037;PFAM:PF12838;PFAM:PF12800;InterPro:IPR017896;PFAM:PF13237;InterPro:IPR010226,PARKENT|GeneID=OUR12_006493-T1|Pro…
GO:0006121	PARKENT|GeneID=OUR12_005504-T1|Product=Succinate dehydrogenase [ubiquinone] flavoprotein subunit 1, mitochondrial|Dbxref=InterPro:IPR011281;InterPro:IPR003953;InterPro:IPR014006;InterPro:IPR015939;InterPro:IPR030664;InterPro:IPR003952;InterPro:IPR037099;InterPro:IPR027477;InterPro:IPR036188;PFAM:PF02910;PFAM:PF00890,PARKENT|GeneID=OUR12_020694-T1|Product=Sdh1-2p|Dbxref=PFAM:PF02910;InterPro:IPR03…
GO:0006122	PARKENT|GeneID=OUR12_001764-T1|Product=hypothetical protein|Dbxref=InterPro:IPR036922;InterPro:IPR005805;PFAM:PF02921;InterPro:IPR014349;InterPro:IPR006317;PFAM:PF00355;InterPro:IPR004192;InterPro:IPR017941,PARKENT|GeneID=OUR12_004833-T1|Product=hypothetical protein|Dbxref=PFAM:PF02271;InterPro:IPR003197;InterPro:IPR036544,PARKENT|GeneID=OUR12_008759-T1|Product=hypothetical protein|Dbxref=InterPr…
GO:0006123	PARKENT|GeneID=OUR12_004848-T1|Product=Cytochrome c oxidase subunit 5b-2, mitochondrial|Dbxref=InterPro:IPR002124,PARKENT|GeneID=OUR12_011237-T1|Product=Cytochrome c oxidase subunit 6A|Dbxref=PFAM:PF02046;InterPro:IPR036418;InterPro:IPR001349,PARKENT|GeneID=OUR12_014299-T1|Product=hypothetical protein|Dbxref=InterPro:IPR036972;InterPro:IPR002124,PARKENT|GeneID=OUR12_014300-T1|Product=hypothetical…
GO:0006139	PARKENT|GeneID=OUR12_001532-T1|Product=hypothetical protein|Dbxref=PFAM:PF00406;InterPro:IPR027417;PFAM:PF13207;InterPro:IPR033690;PFAM:PF05191;InterPro:IPR000850;InterPro:IPR006259;InterPro:IPR007862,PARKENT|GeneID=OUR12_002190-T1|Product=hypothetical protein|Dbxref=InterPro:IPR000484;InterPro:IPR036854;InterPro:IPR037027;InterPro:IPR006641;PFAM:PF00124;InterPro:IPR005227;PFAM:PF03652;InterPro:I…
GO:0006144	PARKENT|GeneID=OUR12_014756-T1|Product=hypothetical protein|Dbxref=InterPro:IPR000895;InterPro:IPR036817;InterPro:IPR036778;InterPro:IPR014306;InterPro:IPR023419;InterPro:IPR023418;PFAM:PF00576;InterPro:IPR023416,PARKENT|GeneID=OUR12_019817-T1|Product=hypothetical protein|Dbxref=InterPro:IPR001805;InterPro:IPR029056;InterPro:IPR011611
GO:0006145	PARKENT|GeneID=OUR12_015587-T1|Product=hypothetical protein|Dbxref=InterPro:IPR032466;InterPro:IPR006680;InterPro:IPR011059;PFAM:PF01979;PFAM:PF24890;InterPro:IPR050138;InterPro:IPR017593,PARKENT|GeneID=OUR12_020122-T1|Product=hypothetical protein|Dbxref=PFAM:PF01014;InterPro:IPR002042
GO:0006152	PARKENT|GeneID=OUR12_007781-T1|Product=Probable uridine nucleosidase 2|Dbxref=InterPro:IPR036452;InterPro:IPR023186;InterPro:IPR001910;PFAM:PF01156,PARKENT|GeneID=OUR12_013144-T1|Product=Uridine nucleosidase 1|Dbxref=InterPro:IPR036452;InterPro:IPR023186;InterPro:IPR001910;PFAM:PF01156,PARKENT|GeneID=OUR12_021324-T1|Product=hypothetical protein|Dbxref=InterPro:IPR028883;PFAM:PF14437;InterPro:IPR0…
GO:0006154	PARKENT|GeneID=OUR12_015020-T1|Product=hypothetical protein|Dbxref=InterPro:IPR001365;InterPro:IPR032466;InterPro:IPR006330;PFAM:PF00962
GO:0006163	PARKENT|GeneID=OUR12_006530-T1|Product=Guanylate kinase 3, chloroplastic|Dbxref=InterPro:IPR027417;InterPro:IPR017665;InterPro:IPR008145;InterPro:IPR020590;PFAM:PF00625;InterPro:IPR008144,PARKENT|GeneID=OUR12_013637-T1|Product=Guanylate kinase 2|Dbxref=InterPro:IPR027417;InterPro:IPR017665;InterPro:IPR008145;InterPro:IPR011043;InterPro:IPR020590;PFAM:PF00625;InterPro:IPR008144
GO:0006164	PARKENT|GeneID=OUR12_000158-T1|Product=hypothetical protein|Dbxref=PFAM:PF01808;InterPro:IPR002695;InterPro:IPR036914;InterPro:IPR011607;PFAM:PF02142;InterPro:IPR024051;InterPro:IPR016193,PARKENT|GeneID=OUR12_000827-T1|Product=ribose phosphate diphosphokinase subunit prs3|Dbxref=InterPro:IPR029057;InterPro:IPR005946;PFAM:PF00156;InterPro:IPR000836;PFAM:PF13793;InterPro:IPR029099,PARKENT|GeneID=OU…
GO:0006165	PARKENT|GeneID=OUR12_017172-T1|Product=hypothetical protein|Dbxref=PFAM:PF00406;InterPro:IPR027417;PFAM:PF13207;InterPro:IPR033690;InterPro:IPR000850,PARKENT|GeneID=OUR12_028672-T1|Product=hypothetical protein|Dbxref=PFAM:PF00406;InterPro:IPR027417;PFAM:PF13207;InterPro:IPR036193;InterPro:IPR033690;InterPro:IPR000850;InterPro:IPR006259
GO:0006166	PARKENT|GeneID=OUR12_019817-T1|Product=hypothetical protein|Dbxref=InterPro:IPR001805;InterPro:IPR029056;InterPro:IPR011611,PARKENT|GeneID=OUR12_028288-T1|Product=hypothetical protein|Dbxref=InterPro:IPR029057;PFAM:PF00156;InterPro:IPR000836;InterPro:IPR050408;InterPro:IPR005904
GO:0006168	PARKENT|GeneID=OUR12_004903-T1|Product=Adenine phosphoribosyltransferase 5|Dbxref=InterPro:IPR050120;InterPro:IPR029057;InterPro:IPR005764;PFAM:PF00156;InterPro:IPR000836,PARKENT|GeneID=OUR12_014400-T1|Product=hypothetical protein|Dbxref=InterPro:IPR050120;InterPro:IPR029057;InterPro:IPR005764;PFAM:PF00156;InterPro:IPR000836,PARKENT|GeneID=OUR12_027421-T1|Product=adenine phosphoribosyltransferase…
GO:0006177	PARKENT|GeneID=OUR12_000828-T1|Product=hypothetical protein|Dbxref=InterPro:IPR035902,PARKENT|GeneID=OUR12_002177-T1|Product=hypothetical protein|Dbxref=InterPro:IPR025777;PFAM:PF03171;InterPro:IPR044861;InterPro:IPR027443;InterPro:IPR001674;InterPro:IPR017926;InterPro:IPR029062;InterPro:IPR014729;InterPro:IPR022955;InterPro:IPR005123;PFAM:PF00958;PFAM:PF00117;InterPro:IPR004739
GO:0006178	PARKENT|GeneID=OUR12_028288-T1|Product=hypothetical protein|Dbxref=InterPro:IPR029057;PFAM:PF00156;InterPro:IPR000836;InterPro:IPR050408;InterPro:IPR005904
GO:0006183	PARKENT|GeneID=OUR12_001984-T1|Product=hypothetical protein|Dbxref=InterPro:IPR034907;PFAM:PF00334;InterPro:IPR001564;InterPro:IPR036850;InterPro:IPR023005,PARKENT|GeneID=OUR12_002862-T1|Product=Nucleoside diphosphate kinase III, chloroplastic/mitochondrial|Dbxref=InterPro:IPR034907;PFAM:PF00334;InterPro:IPR036850;InterPro:IPR001564,PARKENT|GeneID=OUR12_013820-T1|Product=hypothetical protein|Dbxr…
GO:0006188	PARKENT|GeneID=OUR12_001064-T1|Product=hypothetical protein|Dbxref=PFAM:PF19326;InterPro:IPR032466;InterPro:IPR006329;InterPro:IPR006650,PARKENT|GeneID=OUR12_001065-T1|Product=hypothetical protein|Dbxref=InterPro:IPR006329;InterPro:IPR032466,PARKENT|GeneID=OUR12_012203-T1|Product=hypothetical protein|Dbxref=PFAM:PF19326;InterPro:IPR032466;InterPro:IPR006329;InterPro:IPR006650,PARKENT|GeneID=OUR12…
GO:0006189	PARKENT|GeneID=OUR12_000158-T1|Product=hypothetical protein|Dbxref=PFAM:PF01808;InterPro:IPR002695;InterPro:IPR036914;InterPro:IPR011607;PFAM:PF02142;InterPro:IPR024051;InterPro:IPR016193,PARKENT|GeneID=OUR12_002488-T1|Product=Formyltetrahydrofolate deformylase 1, mitochondrial|Dbxref=InterPro:IPR004810;InterPro:IPR002376;PFAM:PF00551;InterPro:IPR036477,PARKENT|GeneID=OUR12_005265-T1|Product=hypo…
GO:0006203	PARKENT|GeneID=OUR12_000293-T1|Product=hypothetical protein|Dbxref=PFAM:PF00293;InterPro:IPR015797;InterPro:IPR000086;InterPro:IPR020476;InterPro:IPR020084,PARKENT|GeneID=OUR12_000933-T1|Product=hypothetical protein|Dbxref=InterPro:IPR003607;PFAM:PF01966;InterPro:IPR050135;InterPro:IPR006674,PARKENT|GeneID=OUR12_022492-T1|Product=hypothetical protein|Dbxref=InterPro:IPR003607;PFAM:PF01966;InterPr…
GO:0006207	PARKENT|GeneID=OUR12_005922-T1|Product=hypothetical protein|Dbxref=PFAM:PF00988;InterPro:IPR006274;InterPro:IPR017926;InterPro:IPR029062;InterPro:IPR035686;PFAM:PF00117;InterPro:IPR036480;InterPro:IPR002474,PARKENT|GeneID=OUR12_016382-T1|Product=hypothetical protein|Dbxref=InterPro:IPR005720;InterPro:IPR013785;InterPro:IPR005719;InterPro:IPR001295;InterPro:IPR050074,PARKENT|GeneID=OUR12_018081-T1…
GO:0006208	PARKENT|GeneID=OUR12_009012-T1|Product=dihydropyrimidinase|Dbxref=InterPro:IPR032466;InterPro:IPR011778;InterPro:IPR011059;InterPro:IPR006680;InterPro:IPR050378;PFAM:PF01979
GO:0006210	PARKENT|GeneID=OUR12_004074-T1|Product=hypothetical protein|Dbxref=InterPro:IPR016163;InterPro:IPR010061;InterPro:IPR015590;InterPro:IPR016161,PARKENT|GeneID=OUR12_004076-T1|Product=Methylmalonate-semialdehyde dehydrogenase [acylating], mitochondrial|Dbxref=PFAM:PF00171;InterPro:IPR016162;InterPro:IPR015590;InterPro:IPR016163;InterPro:IPR016160;InterPro:IPR010061;InterPro:IPR016161,PARKENT|GeneID…
GO:0006212	PARKENT|GeneID=OUR12_025446-T1|Product=Dihydropyrimidine dehydrogenase [NADP(+)]|Dbxref=InterPro:IPR005720;InterPro:IPR013785;PFAM:PF01180
GO:0006221	PARKENT|GeneID=OUR12_001251-T1|Product=hypothetical protein|Dbxref=InterPro:IPR027417;InterPro:IPR004468;InterPro:IPR033828;InterPro:IPR017456;InterPro:IPR017926;InterPro:IPR029062;PFAM:PF00117,PARKENT|GeneID=OUR12_005954-T1|Product=hypothetical protein|Dbxref=PFAM:PF00696;InterPro:IPR015963;InterPro:IPR036393;InterPro:IPR001048,PARKENT|GeneID=OUR12_009896-T1|Product=hypothetical protein|Dbxref=I…
GO:0006222	PARKENT|GeneID=OUR12_020419-T1|Product=hypothetical protein|Dbxref=InterPro:IPR013785;InterPro:IPR029057;PFAM:PF00156;InterPro:IPR023031;InterPro:IPR011060;InterPro:IPR000836;InterPro:IPR001754;InterPro:IPR004467
GO:0006225	PARKENT|GeneID=OUR12_005954-T1|Product=hypothetical protein|Dbxref=PFAM:PF00696;InterPro:IPR015963;InterPro:IPR036393;InterPro:IPR001048,PARKENT|GeneID=OUR12_013201-T1|Product=hypothetical protein|Dbxref=PFAM:PF00696;InterPro:IPR036393;InterPro:IPR001048,PARKENT|GeneID=OUR12_013203-T1|Product=hypothetical protein|Dbxref=PFAM:PF13837;InterPro:IPR044822;PFAM:PF10545;InterPro:IPR036393,PARKENT|GeneI…
GO:0006226	PARKENT|GeneID=OUR12_009002-T1|Product=hypothetical protein|Dbxref=InterPro:IPR036157;InterPro:IPR029054;InterPro:IPR008181;PFAM:PF00692;InterPro:IPR033704
GO:0006227	PARKENT|GeneID=OUR12_022292-T1|Product=dTMP kinase|Dbxref=InterPro:IPR018094;InterPro:IPR027417;InterPro:IPR039430;PFAM:PF02223;InterPro:IPR018095
GO:0006228	PARKENT|GeneID=OUR12_001984-T1|Product=hypothetical protein|Dbxref=InterPro:IPR034907;PFAM:PF00334;InterPro:IPR001564;InterPro:IPR036850;InterPro:IPR023005,PARKENT|GeneID=OUR12_002862-T1|Product=Nucleoside diphosphate kinase III, chloroplastic/mitochondrial|Dbxref=InterPro:IPR034907;PFAM:PF00334;InterPro:IPR036850;InterPro:IPR001564,PARKENT|GeneID=OUR12_013820-T1|Product=hypothetical protein|Dbxr…
GO:0006231	PARKENT|GeneID=OUR12_027793-T1|Product=hypothetical protein|Dbxref=InterPro:IPR023451;InterPro:IPR017925;InterPro:IPR045097;InterPro:IPR024072;InterPro:IPR020940;InterPro:IPR001796;InterPro:IPR000398;PFAM:PF00186;PFAM:PF00303;InterPro:IPR036926,PARKENT|GeneID=OUR12_028501-T1|Product=hypothetical protein|Dbxref=InterPro:IPR023451;InterPro:IPR045097;InterPro:IPR001796;InterPro:IPR024072;InterPro:IP…
GO:0006233	PARKENT|GeneID=OUR12_022292-T1|Product=dTMP kinase|Dbxref=InterPro:IPR018094;InterPro:IPR027417;InterPro:IPR039430;PFAM:PF02223;InterPro:IPR018095
GO:0006235	PARKENT|GeneID=OUR12_022292-T1|Product=dTMP kinase|Dbxref=InterPro:IPR018094;InterPro:IPR027417;InterPro:IPR039430;PFAM:PF02223;InterPro:IPR018095
GO:0006241	PARKENT|GeneID=OUR12_001251-T1|Product=hypothetical protein|Dbxref=InterPro:IPR027417;InterPro:IPR004468;InterPro:IPR033828;InterPro:IPR017456;InterPro:IPR017926;InterPro:IPR029062;PFAM:PF00117,PARKENT|GeneID=OUR12_001984-T1|Product=hypothetical protein|Dbxref=InterPro:IPR034907;PFAM:PF00334;InterPro:IPR001564;InterPro:IPR036850;InterPro:IPR023005,PARKENT|GeneID=OUR12_002862-T1|Product=Nucleoside…
GO:0006259	PARKENT|GeneID=OUR12_006722-T1|Product=Meiotic recombination protein dmc1|Dbxref=InterPro:IPR020587;InterPro:IPR027417;InterPro:IPR010995;InterPro:IPR020588;InterPro:IPR013632,PARKENT|GeneID=OUR12_012713-T1|Product=DNA topoisomerase 6 subunit A|Dbxref=InterPro:IPR002815;InterPro:IPR013049;PFAM:PF04406;PFAM:PF21180;InterPro:IPR034136;InterPro:IPR036078;InterPro:IPR004085;PFAM:PF20768;InterPro:IPR0…
GO:0006260	PARKENT|GeneID=OUR12_000472-T1|Product=origin recognition complex subunit 4|Dbxref=InterPro:IPR032705;PFAM:PF00004;PFAM:PF13401;InterPro:IPR027417;InterPro:IPR016527;InterPro:IPR003959;InterPro:IPR003593,PARKENT|GeneID=OUR12_001140-T1|Product=Origin of replication complex subunit 6|Dbxref=InterPro:IPR054113;PFAM:PF05460;InterPro:IPR008721;InterPro:IPR020529;PFAM:PF21913,PARKENT|GeneID=OUR12_00152…
GO:0006261	PARKENT|GeneID=OUR12_002255-T1|Product=Subunit of heteropentameric Replication factor C (RF-C)|Dbxref=PFAM:PF00004;InterPro:IPR027417;InterPro:IPR047854;PFAM:PF08542;PFAM:PF13177;InterPro:IPR013748;InterPro:IPR050238;InterPro:IPR003959;InterPro:IPR008921;PFAM:PF13173;InterPro:IPR003593,PARKENT|GeneID=OUR12_002751-T1|Product=hypothetical protein|Dbxref=InterPro:IPR008921;InterPro:IPR027417;InterPr…
GO:0006264	PARKENT|GeneID=OUR12_002986-T1|Product=hypothetical protein|Dbxref=InterPro:IPR000424;PFAM:PF00436;InterPro:IPR012340;InterPro:IPR011344,PARKENT|GeneID=OUR12_009464-T1|Product=hypothetical protein|Dbxref=InterPro:IPR000424;PFAM:PF00436;InterPro:IPR012340;InterPro:IPR011344,PARKENT|GeneID=OUR12_017627-T1|Product=hypothetical protein|Dbxref=InterPro:IPR012340;InterPro:IPR000424;InterPro:IPR011344,P…
GO:0006265	PARKENT|GeneID=OUR12_004619-T1|Product=hypothetical protein|Dbxref=InterPro:IPR025589;InterPro:IPR000380;PFAM:PF13368,PARKENT|GeneID=OUR12_004620-T1|Product=hypothetical protein|Dbxref=InterPro:IPR013497;InterPro:IPR013826;InterPro:IPR003602;InterPro:IPR005733;InterPro:IPR000380;InterPro:IPR028612;InterPro:IPR013824;PFAM:PF01131;PFAM:PF01751;InterPro:IPR006171;InterPro:IPR013825;InterPro:IPR02340…
GO:0006266	PARKENT|GeneID=OUR12_009167-T1|Product=tRNA ligase|Dbxref=InterPro:IPR012340;InterPro:IPR012310;InterPro:IPR012309;PFAM:PF04679;InterPro:IPR050191;InterPro:IPR016059;InterPro:IPR000977,PARKENT|GeneID=OUR12_009168-T1|Product=tRNA ligase|Dbxref=InterPro:IPR012310;InterPro:IPR012308;PFAM:PF04675;InterPro:IPR050191;InterPro:IPR016059;InterPro:IPR000977;InterPro:IPR036599;PFAM:PF01068,PARKENT|GeneID=O…
GO:0006268	PARKENT|GeneID=OUR12_001787-T1|Product=hypothetical protein|Dbxref=InterPro:IPR018525;InterPro:IPR012340;InterPro:IPR027417;InterPro:IPR027925;PFAM:PF00493;PFAM:PF17207;PFAM:PF07728;InterPro:IPR001208;InterPro:IPR041562;PFAM:PF17855;PFAM:PF12619;PFAM:PF23669;InterPro:IPR033762;InterPro:IPR008045;InterPro:IPR031327;PFAM:PF14551,PARKENT|GeneID=OUR12_003146-T1|Product=DNA replication licensing facto…
GO:0006269	PARKENT|GeneID=OUR12_001964-T1|Product=hypothetical protein|Dbxref=InterPro:IPR002755;InterPro:IPR014052;PFAM:PF01896,PARKENT|GeneID=OUR12_007141-T1|Product=hypothetical protein|Dbxref=InterPro:IPR007238;PFAM:PF26466
GO:0006270	PARKENT|GeneID=OUR12_000472-T1|Product=origin recognition complex subunit 4|Dbxref=InterPro:IPR032705;PFAM:PF00004;PFAM:PF13401;InterPro:IPR027417;InterPro:IPR016527;InterPro:IPR003959;InterPro:IPR003593,PARKENT|GeneID=OUR12_001140-T1|Product=Origin of replication complex subunit 6|Dbxref=InterPro:IPR054113;PFAM:PF05460;InterPro:IPR008721;InterPro:IPR020529;PFAM:PF21913,PARKENT|GeneID=OUR12_00152…
GO:0006271	PARKENT|GeneID=OUR12_003146-T1|Product=DNA replication licensing factor, mcm4 component|Dbxref=InterPro:IPR031327;InterPro:IPR018525;InterPro:IPR012340;InterPro:IPR036388;InterPro:IPR027417;InterPro:IPR027925;PFAM:PF21128;PFAM:PF00493;PFAM:PF17207;PFAM:PF07728;InterPro:IPR001208;InterPro:IPR041562;PFAM:PF17855;InterPro:IPR033762;InterPro:IPR003593;InterPro:IPR008047;PFAM:PF14551,PARKENT|GeneID=OU…
GO:0006272	PARKENT|GeneID=OUR12_008506-T1|Product=hypothetical protein|Dbxref=PFAM:PF02747;InterPro:IPR022649;PFAM:PF00705;InterPro:IPR046938;InterPro:IPR022648;PFAM:PF04139;InterPro:IPR000730;InterPro:IPR022659,PARKENT|GeneID=OUR12_008507-T1|Product=hypothetical protein|Dbxref=PFAM:PF02747;InterPro:IPR022649;PFAM:PF00705;InterPro:IPR046938;InterPro:IPR022648;InterPro:IPR000730;InterPro:IPR022659;PFAM:PF021…
GO:0006273	PARKENT|GeneID=OUR12_009167-T1|Product=tRNA ligase|Dbxref=InterPro:IPR012340;InterPro:IPR012310;InterPro:IPR012309;PFAM:PF04679;InterPro:IPR050191;InterPro:IPR016059;InterPro:IPR000977,PARKENT|GeneID=OUR12_009168-T1|Product=tRNA ligase|Dbxref=InterPro:IPR012310;InterPro:IPR012308;PFAM:PF04675;InterPro:IPR050191;InterPro:IPR016059;InterPro:IPR000977;InterPro:IPR036599;PFAM:PF01068,PARKENT|GeneID=O…
GO:0006275	PARKENT|GeneID=OUR12_008506-T1|Product=hypothetical protein|Dbxref=PFAM:PF02747;InterPro:IPR022649;PFAM:PF00705;InterPro:IPR046938;InterPro:IPR022648;PFAM:PF04139;InterPro:IPR000730;InterPro:IPR022659,PARKENT|GeneID=OUR12_008507-T1|Product=hypothetical protein|Dbxref=PFAM:PF02747;InterPro:IPR022649;PFAM:PF00705;InterPro:IPR046938;InterPro:IPR022648;InterPro:IPR000730;InterPro:IPR022659;PFAM:PF021…
GO:0006281	PARKENT|GeneID=OUR12_000132-T1|Product=hypothetical protein|Dbxref=InterPro:IPR043128;PFAM:PF00817;InterPro:IPR036775;InterPro:IPR017961;InterPro:IPR001126;InterPro:IPR043502;PFAM:PF11799;InterPro:IPR052230,PARKENT|GeneID=OUR12_000225-T1|Product=hypothetical protein|Dbxref=InterPro:IPR020847;InterPro:IPR013083;PFAM:PF13920;InterPro:IPR052972;InterPro:IPR001841,PARKENT|GeneID=OUR12_000982-T1|Produ…
GO:0006282	PARKENT|GeneID=OUR12_018541-T1|Product=hypothetical protein|Dbxref=PFAM:PF05028;InterPro:IPR046372;PFAM:PF20811;InterPro:IPR048362;InterPro:IPR007724,PARKENT|GeneID=OUR12_029819-T1|Product=hypothetical protein|Dbxref=InterPro:IPR003783;InterPro:IPR053924;PFAM:PF02631;InterPro:IPR036388
GO:0006283	PARKENT|GeneID=OUR12_006188-T1|Product=DNA-directed RNA polymerases II, IV and V subunit 9A|Dbxref=InterPro:IPR034012;InterPro:IPR001529;PFAM:PF02150;InterPro:IPR019761;InterPro:IPR012164;InterPro:IPR001222;PFAM:PF01096,PARKENT|GeneID=OUR12_010173-T1|Product=hypothetical protein|Dbxref=InterPro:IPR027417;InterPro:IPR001650;InterPro:IPR014001;InterPro:IPR000330;InterPro:IPR038718;PFAM:PF00176;PFAM…
GO:0006284	PARKENT|GeneID=OUR12_001245-T1|Product=hypothetical protein|Dbxref=PFAM:PF03352;InterPro:IPR011257;InterPro:IPR005019,PARKENT|GeneID=OUR12_001284-T1|Product=hypothetical protein|Dbxref=PFAM:PF03352;InterPro:IPR011257;InterPro:IPR005019,PARKENT|GeneID=OUR12_001356-T1|Product=hypothetical protein|Dbxref=InterPro:IPR005122;InterPro:IPR002043;InterPro:IPR018085;InterPro:IPR036895;PFAM:PF03167,PARKENT…
GO:0006285	PARKENT|GeneID=OUR12_003551-T1|Product=hypothetical protein|Dbxref=InterPro:IPR051912;InterPro:IPR003265;InterPro:IPR011257;PFAM:PF00730,PARKENT|GeneID=OUR12_005531-T1|Product=hypothetical protein|Dbxref=InterPro:IPR051912;InterPro:IPR003265;InterPro:IPR011257;PFAM:PF00730,PARKENT|GeneID=OUR12_007546-T1|Product=alpha,alpha-trehalase nth1|Dbxref=InterPro:IPR004035;InterPro:IPR003651;InterPro:IPR02…
GO:0006287	PARKENT|GeneID=OUR12_006028-T1|Product=DNA polymerase delta catalytic subunit|Dbxref=InterPro:IPR050240,PARKENT|GeneID=OUR12_006029-T1|Product=DNA polymerase delta catalytic subunit|Dbxref=InterPro:IPR036397;InterPro:IPR006133;PFAM:PF03104;InterPro:IPR050240;PFAM:PF24055;InterPro:IPR012337,PARKENT|GeneID=OUR12_009286-T1|Product=DNA polymerase epsilon catalytic subunit A|Dbxref=InterPro:IPR043502;…
GO:0006289	PARKENT|GeneID=OUR12_000362-T1|Product=Ubiquitin receptor RAD23c|Dbxref=InterPro:IPR009060;InterPro:IPR036353;PFAM:PF00240;PFAM:PF00627;InterPro:IPR029071;InterPro:IPR015940;InterPro:IPR000626;InterPro:IPR015360;PFAM:PF11976;InterPro:IPR006636;InterPro:IPR004806;PFAM:PF09280,PARKENT|GeneID=OUR12_001818-T1|Product=General transcription and DNA repair factor IIH helicase subunit xpb1|Dbxref=PFAM:PF…
GO:0006294	PARKENT|GeneID=OUR12_002369-T1|Product=TFIIH complex subunit tfb5|Dbxref=InterPro:IPR035935;PFAM:PF06331;InterPro:IPR009400
GO:0006296	PARKENT|GeneID=OUR12_002582-T1|Product=DNA repair endonuclease uvh1|Dbxref=InterPro:IPR047520;PFAM:PF02732;InterPro:IPR010994;InterPro:IPR011335;InterPro:IPR006166,PARKENT|GeneID=OUR12_007546-T1|Product=alpha,alpha-trehalase nth1|Dbxref=InterPro:IPR004035;InterPro:IPR003651;InterPro:IPR023170;InterPro:IPR003265;PFAM:PF10576;InterPro:IPR011257;PFAM:PF00730
GO:0006297	PARKENT|GeneID=OUR12_006028-T1|Product=DNA polymerase delta catalytic subunit|Dbxref=InterPro:IPR050240,PARKENT|GeneID=OUR12_006029-T1|Product=DNA polymerase delta catalytic subunit|Dbxref=InterPro:IPR036397;InterPro:IPR006133;PFAM:PF03104;InterPro:IPR050240;PFAM:PF24055;InterPro:IPR012337,PARKENT|GeneID=OUR12_009286-T1|Product=DNA polymerase epsilon catalytic subunit A|Dbxref=InterPro:IPR043502;…
GO:0006298	PARKENT|GeneID=OUR12_002492-T1|Product=MutS protein msh4|Dbxref=InterPro:IPR000432;InterPro:IPR027417;InterPro:IPR045076,PARKENT|GeneID=OUR12_005876-T1|Product=hypothetical protein|Dbxref=InterPro:IPR014790;InterPro:IPR014721;PFAM:PF08676;InterPro:IPR042120;InterPro:IPR014762;InterPro:IPR042121;PFAM:PF02518;InterPro:IPR037198;InterPro:IPR013507;InterPro:IPR038973;PFAM:PF13589;InterPro:IPR036890,P…
GO:0006301	PARKENT|GeneID=OUR12_000616-T1|Product=Ubiquitin-conjugating enzyme E2 variant 1A|Dbxref=PFAM:PF00179;InterPro:IPR016135;InterPro:IPR000608,PARKENT|GeneID=OUR12_009403-T1|Product=Ubiquitin-conjugating enzyme E2 variant 1D|Dbxref=PFAM:PF00179;InterPro:IPR016135;InterPro:IPR000608,PARKENT|GeneID=OUR12_013015-T1|Product=Ubiquitin-conjugating enzyme E2 variant 1D|Dbxref=PFAM:PF00179;InterPro:IPR01613…
GO:0006302	PARKENT|GeneID=OUR12_002025-T1|Product=hypothetical protein|Dbxref=PFAM:PF10382;InterPro:IPR018838;InterPro:IPR052800,PARKENT|GeneID=OUR12_004727-T1|Product=hypothetical protein|Dbxref=PFAM:PF00476;InterPro:IPR048960;InterPro:IPR036397;InterPro:IPR043502;PFAM:PF25453;InterPro:IPR002298;InterPro:IPR001098,PARKENT|GeneID=OUR12_004728-T1|Product=hypothetical protein|Dbxref=PFAM:PF20470;PFAM:PF21099;…
GO:0006303	PARKENT|GeneID=OUR12_000982-T1|Product=hypothetical protein|Dbxref=InterPro:IPR002054;InterPro:IPR036420;InterPro:IPR043519;InterPro:IPR037160;PFAM:PF10391;InterPro:IPR029398;PFAM:PF14792;InterPro:IPR027421;InterPro:IPR018944;InterPro:IPR002008;PFAM:PF14791;InterPro:IPR010996;PFAM:PF14716;InterPro:IPR001357;InterPro:IPR028207;InterPro:IPR022312;InterPro:IPR019843,PARKENT|GeneID=OUR12_004531-T1|Pr…
GO:0006306	PARKENT|GeneID=OUR12_006301-T1|Product=DNA (cytosine-5-)-methyltransferase|Dbxref=InterPro:IPR029063;InterPro:IPR030380;InterPro:IPR001525,PARKENT|GeneID=OUR12_022454-T1|Product=DNA (cytosine-5-)-methyltransferase|Dbxref=InterPro:IPR009060;InterPro:IPR001525;InterPro:IPR029063;InterPro:IPR030380;InterPro:IPR015940
GO:0006307	PARKENT|GeneID=OUR12_003551-T1|Product=hypothetical protein|Dbxref=InterPro:IPR051912;InterPro:IPR003265;InterPro:IPR011257;PFAM:PF00730,PARKENT|GeneID=OUR12_005531-T1|Product=hypothetical protein|Dbxref=InterPro:IPR051912;InterPro:IPR003265;InterPro:IPR011257;PFAM:PF00730,PARKENT|GeneID=OUR12_015275-T1|Product=Alpha-ketoglutarate-dependent dioxygenase alkB 2|Dbxref=InterPro:IPR032852;InterPro:IP…
GO:0006308	PARKENT|GeneID=OUR12_000396-T1|Product=Endonuclease 2|Dbxref=PFAM:PF02265;InterPro:IPR003154;InterPro:IPR008947,PARKENT|GeneID=OUR12_015518-T1|Product=Endonuclease 4|Dbxref=PFAM:PF02265;InterPro:IPR003154;InterPro:IPR008947,PARKENT|GeneID=OUR12_015519-T1|Product=Endonuclease 1|Dbxref=PFAM:PF02265;InterPro:IPR003154;InterPro:IPR008947,PARKENT|GeneID=OUR12_020485-T1|Product=hypothetical protein|Dbx…
GO:0006310	PARKENT|GeneID=OUR12_003009-T1|Product=hypothetical protein|Dbxref=InterPro:IPR004365;InterPro:IPR012340;InterPro:IPR007199;PFAM:PF16900;InterPro:IPR047192;InterPro:IPR001878;PFAM:PF00098;PFAM:PF01336;InterPro:IPR004591;InterPro:IPR013955;InterPro:IPR036875;InterPro:IPR031657;PFAM:PF08646;PFAM:PF04057,PARKENT|GeneID=OUR12_004573-T1|Product=hypothetical protein|Dbxref=InterPro:IPR004365;InterPro:I…
GO:0006312	PARKENT|GeneID=OUR12_006722-T1|Product=Meiotic recombination protein dmc1|Dbxref=InterPro:IPR020587;InterPro:IPR027417;InterPro:IPR010995;InterPro:IPR020588;InterPro:IPR013632,PARKENT|GeneID=OUR12_016503-T1|Product=recombinase rad51|Dbxref=PFAM:PF14520;InterPro:IPR011941;InterPro:IPR020587;InterPro:IPR027417;PFAM:PF00154;InterPro:IPR010995;InterPro:IPR016467;PFAM:PF08423;InterPro:IPR020588;PFAM:P…
GO:0006315	PARKENT|GeneID=OUR12_010783-T1|Product=Nuclear intron maturase 4, mitochondrial|Dbxref=PFAM:PF00078;InterPro:IPR043502;InterPro:IPR000477;PFAM:PF01348;InterPro:IPR024937,PARKENT|GeneID=OUR12_013383-T1|Product=Nuclear intron maturase 3, mitochondrial|Dbxref=PFAM:PF01348;InterPro:IPR024937
GO:0006325	PARKENT|GeneID=OUR12_000482-T1|Product=ASF1 anti-silencing function 1|Dbxref=InterPro:IPR036747;InterPro:IPR006818;PFAM:PF04729,PARKENT|GeneID=OUR12_003259-T1|Product=hypothetical protein|Dbxref=InterPro:IPR048337;InterPro:IPR007005,PARKENT|GeneID=OUR12_003834-T1|Product=hypothetical protein|Dbxref=InterPro:IPR019786;InterPro:IPR013083;InterPro:IPR001965;InterPro:IPR045876;PFAM:PF00628;InterPro:I…
GO:0006334	PARKENT|GeneID=OUR12_000545-T1|Product=hypothetical protein|Dbxref=PFAM:PF00538;InterPro:IPR036390;InterPro:IPR017956;InterPro:IPR005818;InterPro:IPR036388,PARKENT|GeneID=OUR12_000585-T1|Product=hypothetical protein|Dbxref=PFAM:PF00538;InterPro:IPR036390;InterPro:IPR000116;InterPro:IPR017956;InterPro:IPR005818;InterPro:IPR036388,PARKENT|GeneID=OUR12_003914-T1|Product=hypothetical protein|Dbxref=I…
GO:0006335	PARKENT|GeneID=OUR12_000482-T1|Product=ASF1 anti-silencing function 1|Dbxref=InterPro:IPR036747;InterPro:IPR006818;PFAM:PF04729,PARKENT|GeneID=OUR12_005975-T1|Product=3-oxoacyl-[acyl-carrier-protein] synthase|Dbxref=InterPro:IPR036322;InterPro:IPR045145;InterPro:IPR019775;PFAM:PF00400;InterPro:IPR001680;PFAM:PF24105;InterPro:IPR024977;InterPro:IPR015943,PARKENT|GeneID=OUR12_010858-T1|Product=hypo…
GO:0006336	PARKENT|GeneID=OUR12_000482-T1|Product=ASF1 anti-silencing function 1|Dbxref=InterPro:IPR036747;InterPro:IPR006818;PFAM:PF04729,PARKENT|GeneID=OUR12_009308-T1|Product=hypothetical protein|Dbxref=InterPro:IPR036322;PFAM:PF07569;InterPro:IPR011494;InterPro:IPR019775;PFAM:PF00400;InterPro:IPR015943;InterPro:IPR001680;InterPro:IPR031120;PFAM:PF24105,PARKENT|GeneID=OUR12_021757-T1|Product=Histone chap…
GO:0006338	PARKENT|GeneID=OUR12_000161-T1|Product=hypothetical protein|Dbxref=InterPro:IPR001650;InterPro:IPR000330;PFAM:PF11496;PFAM:PF04851;PFAM:PF06465;InterPro:IPR011011;PFAM:PF00271;PFAM:PF00385;InterPro:IPR014001;InterPro:IPR027417;InterPro:IPR013083;InterPro:IPR019786;PFAM:PF00176;InterPro:IPR023780;InterPro:IPR009057;InterPro:IPR038718;InterPro:IPR016197;InterPro:IPR049730;InterPro:IPR001965;PFAM:PF…
GO:0006342	PARKENT|GeneID=OUR12_004792-T1|Product=hypothetical protein|Dbxref=InterPro:IPR007125;InterPro:IPR032454;PFAM:PF16211;InterPro:IPR009072;PFAM:PF00125;InterPro:IPR002119,PARKENT|GeneID=OUR12_008327-T1|Product=hypothetical protein|Dbxref=InterPro:IPR007125;InterPro:IPR032454;PFAM:PF16211;InterPro:IPR032458;InterPro:IPR009072;PFAM:PF00125;InterPro:IPR002119,PARKENT|GeneID=OUR12_009482-T1|Product=His…
GO:0006346	PARKENT|GeneID=OUR12_011822-T1|Product=hypothetical protein|Dbxref=PFAM:PF01426;PFAM:PF12047;InterPro:IPR017198;InterPro:IPR001025;InterPro:IPR043151;InterPro:IPR029063;InterPro:IPR050390;InterPro:IPR022702,PARKENT|GeneID=OUR12_011823-T1|Product=DNA (cytosine-5)-methyltransferase 1B|Dbxref=PFAM:PF01426;PFAM:PF12047;InterPro:IPR017198;InterPro:IPR001025;InterPro:IPR001525;InterPro:IPR043151;InterP…
GO:0006351	PARKENT|GeneID=OUR12_000342-T1|Product=Transcription factor tgal1|Dbxref=InterPro:IPR025422;InterPro:IPR046347;PFAM:PF00170;PFAM:PF07716;PFAM:PF14144;InterPro:IPR004827,PARKENT|GeneID=OUR12_001275-T1|Product=hypothetical protein|Dbxref=InterPro:IPR044295;InterPro:IPR011598;InterPro:IPR036638,PARKENT|GeneID=OUR12_001289-T1|Product=hypothetical protein|Dbxref=InterPro:IPR037159;InterPro:IPR043502;I…
GO:0006352	PARKENT|GeneID=OUR12_003863-T1|Product=hypothetical protein|Dbxref=InterPro:IPR045144;InterPro:IPR022003;InterPro:IPR007900;PFAM:PF12174;PFAM:PF05236,PARKENT|GeneID=OUR12_004351-T1|Product=hypothetical protein|Dbxref=PFAM:PF04539;InterPro:IPR007627;PFAM:PF04545;InterPro:IPR000943;InterPro:IPR013324;InterPro:IPR050239;InterPro:IPR007630;InterPro:IPR014284;PFAM:PF04542;InterPro:IPR007624;InterPro:I…
GO:0006353	PARKENT|GeneID=OUR12_007826-T1|Product=hypothetical protein|Dbxref=InterPro:IPR011605,PARKENT|GeneID=OUR12_010161-T1|Product=hypothetical protein|Dbxref=PFAM:PF07498;InterPro:IPR011112,PARKENT|GeneID=OUR12_013722-T1|Product=hypothetical protein|Dbxref=PFAM:PF07498;InterPro:IPR011112,PARKENT|GeneID=OUR12_015795-T1|Product=hypothetical protein|Dbxref=InterPro:IPR036269;PFAM:PF07498;InterPro:IPR0111…
GO:0006354	PARKENT|GeneID=OUR12_012898-T1|Product=hypothetical protein|Dbxref=InterPro:IPR043425;InterPro:IPR008991;InterPro:IPR014722;InterPro:IPR006645;InterPro:IPR036735;PFAM:PF02357,PARKENT|GeneID=OUR12_028047-T1|Product=hypothetical protein|Dbxref=InterPro:IPR041977;InterPro:IPR005824;PFAM:PF23038;InterPro:IPR041976;InterPro:IPR005825;PFAM:PF23284;InterPro:IPR039659;PFAM:PF11942;PFAM:PF03439;InterPro:I…
GO:0006355	PARKENT|GeneID=OUR12_000014-T1|Product=Agamous-like MADS-box protein ap1|Dbxref=PFAM:PF01486;InterPro:IPR050142;InterPro:IPR002487,PARKENT|GeneID=OUR12_000016-T1|Product=Agamous-like MADS-box protein mads2|Dbxref=PFAM:PF00319;PFAM:PF01486;InterPro:IPR0024
GO:0006357	PARKENT|GeneID=OUR12_000014-T1|Product=Agamous-like MADS-box protein ap1|Dbxref=PFAM:PF01486;InterPro:IPR050142;InterPro:IPR002487,PARKENT|GeneID=OUR12_000016-T1|Product=Agamous-like MADS-box protein mads2|Dbxref=PFAM:PF00319;PFAM:PF01486;InterPro:IPR0024
GO:0006360	PARKENT|GeneID=OUR12_001154-T1|Product=hypothetical protein|Dbxref=InterPro:IPR021752;InterPro:IPR033599;PFAM:PF11781,PARKENT|GeneID=OUR12_011212-T1|Product=hypothetical protein|Dbxref=PFAM:PF08243;InterPro:IPR013256,PARKENT|GeneID=OUR12_017868-T1|Product=hypothetical protein|Dbxref=PFAM:PF01192;InterPro:IPR020708;InterPro:IPR006111;InterPro:IPR028363;InterPro:IPR006110;InterPro:IPR036161,PARKENT…
GO:0006361	PARKENT|GeneID=OUR12_006041-T1|Product=hypothetical protein|Dbxref=InterPro:IPR007991;PFAM:PF05327,PARKENT|GeneID=OUR12_006052-T1|Product=hypothetical protein|Dbxref=InterPro:IPR007991
GO:0006362	PARKENT|GeneID=OUR12_013923-T1|Product=hypothetical protein|Dbxref=InterPro:IPR009668;PFAM:PF06870
GO:0006364	PARKENT|GeneID=OUR12_000186-T1|Product=hypothetical protein|Dbxref=InterPro:IPR053940;InterPro:IPR010678,PARKENT|GeneID=OUR12_002190-T1|Product=hypothetical protein|Dbxref=InterPro:IPR000484;InterPro:IPR036854;InterPro:IPR037027;InterPro:IPR006641;PFAM:PF00124;InterPro:IPR005227;PFAM:PF03652;InterPro:IPR012337,PARKENT|GeneID=OUR12_002913-T1|Product=hypothetical protein|Dbxref=InterPro:IPR027417;I…
GO:0006366	PARKENT|GeneID=OUR12_002369-T1|Product=TFIIH complex subunit tfb5|Dbxref=InterPro:IPR035935;PFAM:PF06331;InterPro:IPR009400,PARKENT|GeneID=OUR12_003426-T1|Product=hypothetical protein|Dbxref=PFAM:PF06244;InterPro:IPR054414;InterPro:IPR010422,PARKENT|GeneID=OUR12_005036-T1|Product=DNA-directed RNA polymerases II, IV and V subunit 11|Dbxref=InterPro:IPR037685;InterPro:IPR009025;PFAM:PF01193;InterPr…
GO:0006367	PARKENT|GeneID=OUR12_001818-T1|Product=General transcription and DNA repair factor IIH helicase subunit xpb1|Dbxref=PFAM:PF13625;InterPro:IPR027417;InterPro:IPR014001;InterPro:IPR001650;PFAM:PF16203;InterPro:IPR032830;InterPro:IPR050615;InterPro:IPR001161;PFAM:PF04851;InterPro:IPR032438;PFAM:PF00271;InterPro:IPR006935,PARKENT|GeneID=OUR12_002231-T1|Product=hypothetical protein|Dbxref=InterPro:IPR…
GO:0006368	PARKENT|GeneID=OUR12_006667-T1|Product=accessory factor associated with RNA polymerase II|Dbxref=InterPro:IPR038103;InterPro:IPR032041;InterPro:IPR031336;PFAM:PF05179;InterPro:IPR007852,PARKENT|GeneID=OUR12_012375-T1|Product=hypothetical protein|Dbxref=PFAM:PF07500;InterPro:IPR006289;InterPro:IPR003618;InterPro:IPR036575;InterPro:IPR035100;InterPro:IPR001222;PFAM:PF01096,PARKENT|GeneID=OUR12_0124…
GO:0006369	PARKENT|GeneID=OUR12_008929-T1|Product=hypothetical protein|Dbxref=InterPro:IPR006811;PFAM:PF04722,PARKENT|GeneID=OUR12_013174-T1|Product=hypothetical protein|Dbxref=InterPro:IPR013087;InterPro:IPR006569;PFAM:PF04818;InterPro:IPR047415;PFAM:PF23228;InterPro:IPR045154;InterPro:IPR008942,PARKENT|GeneID=OUR12_015013-T1|Product=hypothetical protein|Dbxref=InterPro:IPR013087;InterPro:IPR006569;PFAM:PF…
[truncated: 3,094 more rows]
