# Supplementary material
Source: Research Square preprint supplement (doi:10.21203/rs.3.rs-9233976/v1)
Supplement: Supplementary file 2 [file 3de3288060ef7d47831f9048.xlsx]

## Sheet: Лист1
Article title: De novo genome assembly and annotation of the Uzbek autochthonous grapevine cultivar Parkent (Vitis vinifera L.)
Journal: Plant Molecular Biology Reporter
Authors: Ilkhom B. Salakhutdinov, Dmitriy A. Mirzabaev, Venera S. Kamburova, Dilshod E. Usmonov, Farhod S. Radjapov, Shukhrat E. Shermatov, Zabardast T. Buriev, Ibrokhim Y. Abdurakhmonov.
Affiliation: Center of Genomics and Bioinformatics of the Academy of Sciences of the Republic of Uzbekistan
Corresponding author: Dmitriy A. Mirzabaev, email: dmitriy08m@gmail.com.
Online Resource 4. Statistics of the de novo genome assembly for V. vinifera cv. Parkent
Assembly metrics (QUAST)
# contigs (>= 0 bp)	404401
# contigs (>= 1000 bp)	86403
# contigs (>= 5000 bp)	16763
# contigs (>= 10000 bp)	5595
# contigs (>= 25000 bp)	741
# contigs (>= 50000 bp)	83
Total length (>= 0 bp)	449418097
Total length (>= 1000 bp)	326847502
Total length (>= 5000 bp)	174192488
Total length (>= 10000 bp)	97117009
Total length (>= 25000 bp)	27055239
Total length (>= 50000 bp)	5488186
# contigs	404401
Largest contig	144669
Total length	449418097
GC (%)	34.27
N50	3209
N90	329
auN	7165.9
L50	29461
L90	233874
# N's per 100 kbp	0.00
BUSCO completeness assessment (n = 2326)
Complete BUSCOs	1364 (58.6%)
Single-copy	1340 (57.6%)
Duplicated	24 (1.0%)
Fragmented	528 (22.7%)
Missing	434 (18.7%)
All statistics are based on contigs of size >= 200 bp, unless otherwise noted (e.g., "# contigs (>= 0 bp)" and "Total length (>= 0 bp)" include all contigs); # - number.
