# Supplementary material
Source: Research Square preprint supplement (doi:10.21203/rs.3.rs-9233976/v1)
Supplement: Supplementary file 3 [file 561e3ca91333ad3811036170.xlsx]

## Sheet: Лист1
Article title: De novo genome assembly and annotation of the Uzbek autochthonous grapevine cultivar Parkent (Vitis vinifera L.)
Journal: Plant Molecular Biology Reporter
Authors: Ilkhom B. Salakhutdinov, Dmitriy A. Mirzabaev, Venera S. Kamburova, Dilshod E. Usmonov, Farhod S. Radjapov, Shukhrat E. Shermatov, Zabardast T. Buriev, Ibrokhim Y. Abdurakhmonov.
Affiliation: Center of Genomics and Bioinformatics of the Academy of Sciences of the Republic of Uzbekistan
Corresponding author: Dmitriy A. Mirzabaev, email: dmitriy08m@gmail.com.
Online Resource 7. Classification and proportions of repetitive sequences and transposable elements in the cv. Parkent genome assembly
==================================================
file name:	Parkent_genome_final.fasta
sequences:	219068
total length:	466480055 bp (454509135 bp excl N/X-runs)
GC level:	34.31 %
bases masked:	241397691 bp ( 51.75 %)
==================================================
		number of elements*	length occupied	percentage of sequence
------------------------------------------------------------------------------
Retroelements		202491	95213360 bp	20.41 %
SINEs:		0	0 bp	0.00 %
Penelope:		0	0 bp	0.00 %
LINEs:		39862	18450098 bp	3.96 %
CRE/SLACS		0	0 bp	0.00 %
L2/CR1/Rex		0	0 bp	0.00 %
R1/LOA/Jockey		0	0 bp	0.00 %
R2/R4/NeSL		0	0 bp	0.00 %
RTE/Bov-B		1316	221718 bp	0.05 %
L1/CIN4		38546	18228380 bp	3.91 %
LTR elements:		162629	76763262 bp	16.46 %
BEL/Pao		470	140459 bp	0.03 %
Ty1/Copia		91726	43361691 bp	9.30 %
Gypsy/DIRS1		59927	29564326 bp	6.34 %
Retroviral		0	0 bp	0.00 %
Rolling-circles		3431	1996820 bp	0.43 %
Unclassified:		486549	129247300 bp	27.71 %
Total interspersed repeats:			232507707 bp	49.84 %
Small RNA:		849	169608 bp	0.04 %
Satellites:		0	0 bp	0.00 %
Simple repeats:		170916	6723556 bp	1.44 %
Low complexity:		0	0 bp	0.00 %
==================================================
* most repeats fragmented by insertions or deletions have been counted as one element
