# Supplementary material
Source: Research Square preprint supplement (doi:10.21203/rs.3.rs-9233976/v1)
Supplement: Supplementary file 4 [file a229a855e2c3a3bac4a0f5a7.xlsx]

## Sheet: Лист1
Article title: De novo genome assembly and annotation of the Uzbek autochthonous grapevine cultivar Parkent (Vitis vinifera L.)
Journal: Plant Molecular Biology Reporter
Authors: Ilkhom B. Salakhutdinov, Dmitriy A. Mirzabaev, Venera S. Kamburova, Dilshod E. Usmonov, Farhod S. Radjapov, Shukhrat E. Shermatov, Zabardast T. Buriev, Ibrokhim Y. Abdurakhmonov.
Affiliation: Center of Genomics and Bioinformatics of the Academy of Sciences of the Republic of Uzbekistan
Corresponding author: Dmitriy A. Mirzabaev, email: dmitriy08m@gmail.com.
Online Resource 5. Statistics of the V. vinifera cv. Parkent genome assembly after RagTag scaffolding and three rounds of polishing.
Assembly metrics (QUAST)	Final Polished Assembly (Scaffold-level)¹	Gap-split Assembly (Contig-level)²
# contigs (>= 0 bp)	219068	-
# contigs (>= 1000 bp)	15533	77482
# contigs (>= 5000 bp)	1008	20250
# contigs (>= 10000 bp)	162	7500
# contigs (>= 25000 bp)	22	1114
# contigs (>= 50000 bp)	19	148
Total length (>= 0 bp)	466480055	-
Total length (>= 1000 bp)	393823620	356607417
Total length (>= 5000 bp)	366087314	224334671
Total length (>= 10000 bp)	360521217	135215237
Total length (>= 25000 bp)	358728975	42214405
Total length (>= 50000 bp)	358640891	10232646
# contigs	219068	339397
Largest contig	26593664	187861
Total length	466480055	454335245
Reference length	494873210	494873210
GC (%)	34.31	34.31
Reference GC (%)	35.07	35.07
N50	17766594	4885
NG50	17766594	4115
N90	430	360
NG90	287	238
auN	14935786.8	9685.2
auNG	14078851.9	8891.9
L50	12	20824
LG50	12	25347
L90	58397	171529
LG90	133210	296536
# misassemblies	17220	15202
# misassembled contigs	5901	13472
Misassembled contigs length	362564155	68918656
# local misassemblies	7097	6481
# scaffold gap ext. mis.	17179	-
# scaffold gap loc. mis.	46339	-
# unaligned mis. contigs	1289	2377
# unaligned contigs	52580 + 5436 part	58886 + 13486 part
Unaligned length	72927921	67015082
Genome fraction (%)	67.933	68.173
Duplication ratio	1.132	1.128
# N's per 100 kbp	2603.50	0.00
# mismatches per 100 kbp	1194.77	1199.43
# indels per 100 kbp	191.14	179.39
# genomic features	549627 + 51767 part	534112 + 67166 part
Largest alignment	610564	179146
Total aligned length	380466574	380595442
NA50	37348	3401
NGA50	31740	2683
NA90	-	-
NGA90	-	-
auNA	64641.4	7405.8
auNGA	60932.6	6799.1
LA50	2723	27094
LGA50	3135	33799
LA90	-	-
LGA90	-	-
BUSCO completeness assessment (n = 2326)
Complete BUSCOs	2284 (98.2%)
Single-copy	2265 (97.4%)
Duplicated	19 (0.8%)
Fragmented	17 (0.7%)
Missing	25 (1.1%)
¹ Final Polished Assembly: The comprehensive V. vinifera cv. Parkent genome assembly obtained after orientation with RagTag and three consecutive rounds of polishing.
² Gap-split Assembly: The polished assembly explicitly split into contigs at each gap position (≥10 unknown nucleotides, N) to assess the baseline structural variations and misassemblies originating solely from primary contig sequences.
All statistics are based on contigs of size >= 200 bp, unless otherwise noted (e.g., "# contigs (>= 0 bp)" and "Total length (>= 0 bp)" include all contigs); # - number.
