# Supplementary material
Source: Research Square preprint supplement (doi:10.21203/rs.3.rs-9233976/v1)
Supplement: Supplementary file 5 [file a457a21eaa4928403c8aedac.xlsx]

## Sheet: Лист1
Article title: De novo genome assembly and annotation of the Uzbek autochthonous grapevine cultivar Parkent (Vitis vinifera L.)
Journal: Plant Molecular Biology Reporter
Authors: Ilkhom B. Salakhutdinov, Dmitriy A. Mirzabaev, Venera S. Kamburova, Dilshod E. Usmonov, Farhod S. Radjapov, Shukhrat E. Shermatov, Zabardast T. Buriev, Ibrokhim Y. Abdurakhmonov.
Affiliation: Center of Genomics and Bioinformatics of the Academy of Sciences of the Republic of Uzbekistan
Corresponding author: Dmitriy A. Mirzabaev, email: dmitriy08m@gmail.com.
Online Resource 3. Summary of genome characteristics estimated by GenomeScope 2.0 at different k-mer sizes (k = 21, 33, 63)
	k- 21
property	min	max
Heterozygosity	1.47416	1.59138
Genome Haploid Length	477,888,383 bp	482,473,781 bp
Genome Repeat Length	210,373,735 bp	212,392,297 bp
Genome Unique Length	267,514,649 bp	270,081,485 bp
Model Fit	65.3472	98.4395
Read Error Rate	0.174974	0.174974
Formula:
y_transform ~ x^transform_exp * length * predict2_0(r1, k, d, kmercov, bias, x)
Parameters:
Estimate Std. Error t value Pr(>|t|)
d 9.173e-02 2.234e-03 41.06 <2e-16 ***
r1 1.533e-02 2.930e-04 52.31 <2e-16 ***
kmercov 1.602e+01 3.824e-02 418.88 <2e-16 ***
bias 1.351e+00 3.814e-02 35.43 <2e-16 ***
length 2.959e+08 9.215e+05 321.13 <2e-16 ***
---
Signif. codes: 0 '***' 0.001 '**' 0.01 '*' 0.05 '.' 0.1 ' ' 1
Residual standard error: 3408000 on 1995 degrees of freedom
Number of iterations to convergence: 8
Achieved convergence tolerance: 1.49e-08
http://genomescope.org/genomescope2.0/analysis.php?code=RMByQlYQIs65BswQ1Q8B
	k- 33
property	min	max
Heterozygosity	1.39898	1.46313
Genome Haploid Length	477,479,978 bp	481,920,706 bp
Genome Repeat Length	165,925,439 bp	167,468,603 bp
Genome Unique Length	311,554,539 bp	314,452,103 bp
Model Fit	74.0283	98.6218
Read Error Rate	0.172508	0.172508
Formula:
y_transform ~ x^transform_exp * length * predict2_0(r1, k, d, kmercov, bias, x)
Parameters:
Estimate Std. Error t value Pr(>|t|)
d 7.862e-02 2.004e-03 39.23 <2e-16 ***
r1 1.431e-02 1.604e-04 89.24 <2e-16 ***
kmercov 1.426e+01 3.299e-02 432.09 <2e-16 ***
bias 1.252e+00 3.287e-02 38.08 <2e-16 ***
length 3.397e+08 8.484e+05 400.39 <2e-16 ***
---
Signif. codes: 0 '***' 0.001 '**' 0.01 '*' 0.05 '.' 0.1 ' ' 1
Residual standard error: 2392000 on 1995 degrees of freedom
Number of iterations to convergence: 10
Achieved convergence tolerance: 1.49e-08
http://genomescope.org/genomescope2.0/analysis.php?code=k5GzIkTXK1dSn1WCADD5
	k- 63
property	min	max
Heterozygosity	1.06149	1.32115
Genome Haploid Length	452,692,365 bp	474,392,317 bp
Genome Repeat Length	128,803,830 bp	134,978,083 bp
Genome Unique Length	323,888,535 bp	339,414,235 bp
Model Fit	82.1163	99.4311
Read Error Rate	0.164271	0.164271
Formula:
y_transform ~ x^transform_exp * length * predict2_0(r1, k, d, kmercov, bias, x)
Parameters:
Estimate Std. Error t value Pr(>|t|)
d 8.320e-02 4.559e-03 18.251 <2e-16 ***
r1 1.191e-02 6.492e-04 18.352 <2e-16 ***
kmercov 9.957e+00 1.165e-01 85.446 <2e-16 ***
bias 1.043e+00 1.072e-01 9.729 <2e-16 ***
length 3.616e+08 1.820e+06 198.668 <2e-16 ***
---
Signif. codes: 0 '***' 0.001 '**' 0.01 '*' 0.05 '.' 0.1 ' ' 1
Residual standard error: 1211000 on 1995 degrees of freedom
Number of iterations to convergence: 17
Achieved convergence tolerance: 1.49e-08
http://genomescope.org/genomescope2.0/analysis.php?code=UXchs94zG2QotEfzu8cP
