# Supplementary material
Source: Research Square preprint supplement (doi:10.21203/rs.3.rs-9233976/v1)
Supplement: Supplementary file 6 [file bab4af5dd4d655223e70a11c.xlsx]

## Sheet: Лист1
Article title: De novo genome assembly and annotation of the Uzbek autochthonous grapevine cultivar Parkent (Vitis vinifera L.)
Journal: Plant Molecular Biology Reporter
Authors: Ilkhom B. Salakhutdinov, Dmitriy A. Mirzabaev, Venera S. Kamburova, Dilshod E. Usmonov, Farhod S. Radjapov, Shukhrat E. Shermatov, Zabardast T. Buriev, Ibrokhim Y. Abdurakhmonov.
Affiliation: Center of Genomics and Bioinformatics of the Academy of Sciences of the Republic of Uzbekistan
Corresponding author: Dmitriy A. Mirzabaev, email: dmitriy08m@gmail.com.
Online Resource 6. Comparative analysis of structural variations, assembly inaccuracies, and micro-mutations in the V. vinifera cv. Parkent genome.
Category / Metric (QUAST)	Final Polished Assembly (Scaffold-level)¹	Gap-split Assembly (Contig-level)²
I. Large-scale Structural Variations
Total Misassemblies	17,220	15.202
Relocations (Total)	10.633	7.456
originating from contigs	6.813	7.456
originating from scaffold gaps	3.82	0
Translocations (Total)	6.533	7.689
originating from contigs	5.534	7.689
originating from scaffold gaps	999	0
Inversions (Total)	54	57
originating from contigs	41	57
originating from scaffold gaps	13	0
Local misassemblies	7.097	6.481
II. Assembly Continuity Inaccuracies
Misassembled contigs (number)	5.901	13.472
Total length of misassembled contigs (bp)	362,564,155	68,918,656
Unaligned misassembled contigs	1.289	2.377
Scaffold gap extensive misassemblies	17.179	-
Scaffold gap local misassemblies	46.339	-
III. Small-scale Variations (Micro-mutations)
Mismatches (SNPs)	4,545,716	4,564,982
Indels (Total)	727.231	682.746
Short indels (≤ 5 bp)	553.495	547.461
Long indels (> 5 bp)	173.736	135.285
Total Indel length (bp)	8,607,375	3,639,934
¹ Final Polished Assembly: The comprehensive V. vinifera cv. Parkent genome assembly obtained after orientation with RagTag and three consecutive rounds of polishing.
² Gap-split Assembly: The polished assembly explicitly split into contigs at each gap position (≥10 unknown nucleotides, N) to assess the baseline structural variations and misassemblies originating solely from primary contig sequences.
