# Supplementary material
Source: Research Square preprint supplement (doi:10.21203/rs.3.rs-9233976/v1)
Supplement: Supplementary file 7 [file f56cec125cf7716269db49bb.xlsx]

## Sheet: Лист1
Article title: De novo genome assembly and annotation of the Uzbek autochthonous grapevine cultivar Parkent (Vitis vinifera L.)
Journal: Plant Molecular Biology Reporter
Authors: Ilkhom B. Salakhutdinov, Dmitriy A. Mirzabaev, Venera S. Kamburova, Dilshod E. Usmonov, Farhod S. Radjapov, Shukhrat E. Shermatov, Zabardast T. Buriev, Ibrokhim Y. Abdurakhmonov.
Affiliation: Center of Genomics and Bioinformatics of the Academy of Sciences of the Republic of Uzbekistan
Corresponding author: Dmitriy A. Mirzabaev, email: dmitriy08m@gmail.com.
Online Resource 2. Comparative quality assessment of sequencing reads before and after filtering and decontamination steps for Vitis vinifera cv. Parkent.
FastQC quality assessment of raw sequencing reads
	Total sequences	Total Bases	Sequence length	%GC	Per base sequence quality	Per tile sequence quality	Per sequence quality scores	Per base sequence content	Per sequence GC content	Per base N content	Sequence Length Distribution	Sequence Duplication Levels (%)	Overrepresented sequences	Adapter Content
SRR33453403_R1	83375581	12,2 Gbp	35-151	36	Good	Failure	Good	Failure	Warning	Good	Warning	Warning	Warning	Good
SRR33453403_R2	83375581	12,2 Gbp	33-151	36	Good	Good	Good	Failure	Warning	Good	Warning	Warning	Warning	Good
FastQC quality metrics after filtering and decontamination (fastp, Kraken2)
	Total sequences	Total Bases	Sequence length	%GC	Per base sequence quality	Per tile sequence quality	Per sequence quality scores	Per base sequence content	Per sequence GC content	Per base N content	Sequence Length Distribution	Sequence Duplication Levels (%)	Overrepresented sequences	Adapter Content
SRR33453403_R1	74378635	9,8 Gbp	50-134	35	Good	Failure	Good	Good	Good	Good	Warning	Warning	Good	Good
SRR33453403_R2	74378635	9,8 Gbp	50-134	35	Good	Warning	Good	Good	Good	Good	Good	Good	Good	Good
